# Supplementary material for: Novel regulators of islet function identified from genetic variation in mouse islet Ca2+ oscillations
Source: eLife. 2023 Oct 3;12:RP88189. doi: 10.7554/eLife.88189 (PMC10547476; doi:10.7554/eLife.88189)
Supplement: Supplementary file 1. — This includes protein IDs, gene names, gene IDs, and human orthologues for each of the proteins that correlate to one of the following metrics and have a glycemic-related SNP (see Table 2): basal Ca2+, 8G SD, 8G/QLA SD, 8G/QLA/GIP SD, 8G AD, 8G PD, and 8G 1st freq. [file elife-88189-supp1.xlsx]

## Sheet: Sheet1
Supplemental file 1
Protein ID	Gene name	Gene ID or gene number	Human orthologue
Q9CQA1	Trappc5	66682	TRAPPC5
Q8CC86	Naprt	223646	NAPRT
Q5H8C4-2;Q5H8C4;Q8CDS8;Q6P6M9	Vps13a	271564	VPS13A
P10639	Txn	22166	TXN
I1E4X5;Q8BWQ6;D3YW20;D3YW19;Q8BWQ6-3	9030624J02Rik	71517	VPS35L
E0CXW2;E9PUK2;Q80V03-2;Q80V03	Adck5	268822	ADCK5
A2A6P4;Q8BKU4;Q9CQP1;Q3TYF6;Q3TY58	Fam104a	28081	FAM104A
Q91ZE0	Tmlhe	MGI:2180203	TMLHE
P70280	Vamp7	MGI:1096399	VAMP7
Q8VE95	C030006K11Rik	ENSMUSG00000116138	C8orf82
P42208;E9Q3V6;F6WYM0;D3YYB1;D3Z3C0	Septin2	ENSMUSG00000116048	SEPTIN2
Q543K9;P23492	Pnp	ENSMUSG00000115338	PNP
Q9CRC0	Vkorc1	ENSMUSG00000096145	VKORC1
Q6ZWR6-4;Q6ZWR6	Syne1	ENSMUSG00000096054	SYNE1
Q14A47;Q8K003	Tma7	ENSMUSG00000091537	TMA7
Q5BLJ7;P62301;Q921R2	Rps13	ENSMUSG00000090862	RPS13
Q9WV96;D6RG99;D3YVK5;D3YVK4	Timm10b	ENSMUSG00000089847	TIMM10B
Q9CPW2	Fdx2	ENSMUSG00000079677	FDX2
A0A087WQE6;A0A087WNT1;P83940;A0A087WPE4	Eloc	ENSMUSG00000079658	ELOC
Q8R2U0-2;Q8R2U0	Seh1l	ENSMUSG00000079614	SEH1L
Q9D002;Q9CZE1;Q545N1;P56873	Znrd2	ENSMUSG00000079478	ZNRD2
Q99JR8-2;Q99JR8;Q3TXH6;Q3TM59	Smarcd2	ENSMUSG00000078619	SMARCD2
S4R191;S4R1P3;S4R2T3;P0C8K7	Smim1	ENSMUSG00000078350	SMIM1
Q9JJQ6;Q3TLS9;Q8CCG9;Q00558	F8a	ENSMUSG00000078317	F8A1
Q80TA1;Q9D4D0	Selenoi	ENSMUSG00000075703	SELENOI
Q8VCQ3;E0CZ57	Nrbf2	ENSMUSG00000075000	NRBF2
Q3ULL5;Q99L45	Eif2s2	ENSMUSG00000074656	EIF2S2
G5E8V9;E9Q3G5	Arfip1	ENSMUSG00000074513	ARFIP1
Q9D9Z5	Dda1	ENSMUSG00000074247	DDA1
Q62084	Ppp1r14bl	ENSMUSG00000073730	PPP1R14B
O78207;W5XQG0;Q792Z7;P01899;Q31168;Q31167;O78206;O19467;Q569W0	H2-D1	ENSMUSG00000073411	HLA-E
B1AVZ0	Uprt	ENSMUSG00000073016	UPRT
P68369	Tuba1a	ENSMUSG00000072235	TUBA1A
Q505N7;Q3UW66;Q99J99	Mpst	ENSMUSG00000071711	MPST
Q3U781;Q9D6W4;P84104-2;P84104;A2A4X6	Srsf3	ENSMUSG00000071172	SRSF3
A2AP32;A2AP31;Q3UIU2	Ndufb6	ENSMUSG00000071014	NDUFB6
Q80X95	Rraga	ENSMUSG00000070934	RRAGA
Q9JJL8	Sars2	ENSMUSG00000070699	SARS2
Q04750	Top1	ENSMUSG00000070544	TOP1
Q544H0;Q9Z1D1;Q3THA0	Eif3g	ENSMUSG00000070319	EIF3G
Q8BTZ7	Gmppb	ENSMUSG00000070284	GMPPB
Q8BXR1;D3YY38	Slc7a14	ENSMUSG00000069072	SLC7A14
G3X9M0;Q9ER88;Q9ER88-2	Dap3	ENSMUSG00000068921	DAP3
Q3U7U8;C5H0E8;P62835;Q3V3W9;C5H0E9	Rap1a	ENSMUSG00000068798	RAP1A
Q9CQU1	Mfap1	ENSMUSG00000068479	MFAP1
D3YX27;Q3TXN0;Q3UJR3;Q9JIY5;S4R1B3;Q80V84;F6XUR8;F6TCV0;D3YX28	Htra2	ENSMUSG00000068329	HTRA2
Q8R0J7	Vps37b	ENSMUSG00000066278	VPS37B
Q9EPL8	Ipo7	ENSMUSG00000066232	IPO7
P11352	Gpx1	ENSMUSG00000063856	GPX1
Q6PAL3;Q8BNE3;Q8BSZ2	Ap3s2	ENSMUSG00000063801	AP3S2
Q9CQ65	Mtap	ENSMUSG00000062937	MTAP
Q4KL81;P63260;Q3TSB7;Q3UD81	Actg1	ENSMUSG00000062825	ACTG1
Q6P1A9;Q5EBG5;Q58ET1;Q80UT7;P12970	Rpl7a	ENSMUSG00000062647	RPL7A
Supplemental file 1 continued
Protein ID	Gene name	Gene ID or gene number	Human orthologue
Q9JME5	Ap3b2	ENSMUSG00000062444	AP3B2
Q3UIZ0;Q99KY4-2;Q99KY4;Q3UDE5	Gak	ENSMUSG00000062234	GAK
Q9DB29	Iah1	ENSMUSG00000062054	IAH1
Q3THU8;Q8VEM8;G5E902;Q3UB63;Q3U995	Slc25a3	ENSMUSG00000061904	SLC25A3
E9PVD1	Ccdc62	ENSMUSG00000061882	CCDC62
Q5M9L7;Q8BT90;P63276;Q3TK12	Rps17	ENSMUSG00000061787	RPS17
Q9CRY7	Gdpd1	ENSMUSG00000061666	GDPD1
A0MNP4;Q9ERF3;Q8BVQ0;D6RDC7	Wdr61	ENSMUSG00000061559	WDR61
Q6RJ37;Q5KTQ2;O35641;P01902;Q31634;Q31191;Q31148;Q31614;Q31290	H2-K1	ENSMUSG00000061232	HLA-E
Q9ER38	Tor3a	ENSMUSG00000060519	TOR3A
Q99L69;Q3U3J1;P50136	Bckdha	ENSMUSG00000060376	BCKDHA
G3UYD0;Q3UHU8;Q9ESZ8-5;Q9ESZ8-4;Q9ESZ8-3;Q9ESZ8-6;Q9ESZ8-2;Q9ESZ8	Gtf2i	ENSMUSG00000060261	GTF2I
Q9DCD8;Q58EV4;O70435;Q3TEL1;E0CX62	Psma3	ENSMUSG00000060073	PSMA3
P17156;B7U582	Hspa2	ENSMUSG00000059970	HSPA2
I6L960;G3X9Y5;Q6A0C5;E9Q735	Ube4a	ENSMUSG00000059890	UBE4A
Q4FZL1;Q5F2A7;P60843;Q3UXC2;Q3TGK7;Q3TFG3;Q3TLL6;Q3U8I0;Q78WR5	Eif4a1	ENSMUSG00000059796	EIF4A1
Q540I4;Q3TJS0;O08917;G3UYU4	Flot1	ENSMUSG00000059714	FLOT1
Q5NCJ9;Q8R1I1	Uqcr10	ENSMUSG00000059534	UQCR10
A2RSB1;B7ZNL2;Q8C1W9;Q78ZA7	Nap1l4	ENSMUSG00000059119	NAP1L4
Q642K1;Q58EW0;P35980;Q0QEW9;G3UZJ6;G3UZK4	Rpl18	ENSMUSG00000059070	RPL18
Q1WWK3;P43276	H1f5	ENSMUSG00000058773	H1-5
Q4PZA2-3;Q4PZA2-4;Q4PZA2;Q4PZA2-2	Ece1	ENSMUSG00000057530	ECE1
Q3UHJ0;Q3UHJ0-2	Aak1	ENSMUSG00000057230	AAK1
F6RPJ9;Q8CGB9;Q9JHR7	Ide	ENSMUSG00000056999	IDE
P42128	Foxk1	ENSMUSG00000056493	FOXK1
Q544Y7;P18760;F8WGL3;Q9CX22	Cfl1	ENSMUSG00000056201	CFL1
E9Q5W5;Q5SSH7-2;Q5SSH7	Zzef1	ENSMUSG00000055670	ZZEF1
A0AUN0;Q4G0C0;G3X928	Sec23ip	ENSMUSG00000055319	SEC23IP
Q8R395	Commd5	ENSMUSG00000055041	COMMD5
Q4W4C9;Q3TVC0;B2L107;P62761	Vsnl1	ENSMUSG00000054459	VSNL1
B0FTY3;Q8R1N4;Q8R1N4-2;Q8R1N4-3	Nudcd3	ENSMUSG00000053838	NUDCD3
Q61292;Q3USI2	Lamb2	ENSMUSG00000052911	LAMB2
Q9R1T2;Q9R1T2-2	Sae1	ENSMUSG00000052833	SAE1
Q7TMK6;Q3UWV9;Q3TKK8	Hook2	ENSMUSG00000052566	HOOK2
Q505D7	Opa3	ENSMUSG00000052214	OPA3
Q8K3W0;D3Z7P0;Q8K3W0-1;Q8K3W0-5;Q8K3W0-6;E9Q0U3;Q8K3W0-4	Babam2	ENSMUSG00000052139	BABAM2
Q9QY96;Q9QY96-2;Q8CDP3	Casr	ENSMUSG00000051980	CASR
A2ASS6;E9Q8N1;E9Q8K5;A2ASS6-2	Ttn	ENSMUSG00000051747	TTN
P43274	H1f4	ENSMUSG00000051627	H1-4
Q9CZP0	Ufsp1	ENSMUSG00000051502	UFSP1
Q91WK1	Spryd4	ENSMUSG00000051346	SPRYD4
Q9Z0W3;Q9Z0W3-2	Nup160	ENSMUSG00000051329	NUP160
Q2M4J2;Q9Z1B3-2;Q9Z1B3-3;Q9Z1B3;Q6ZQ92;Q3UPW0	Plcb1	ENSMUSG00000051177	PLCB1
A2AIL4	Ndufaf6	ENSMUSG00000050323	NDUFAF6
P27661	H2ax	ENSMUSG00000049932	H2AX
Q8R086	Suox	ENSMUSG00000049858	SUOX
P43275	H1f1	ENSMUSG00000049539	H1-1
Q3U3H9;P61963;Q80ZU1	Dcaf7	ENSMUSG00000049354	DCAF7
A2ASW4;Q9EQZ6-3;Q9EQZ6;A2ASW8;Q571A8;Q9EQZ6-2	Rapgef4	ENSMUSG00000049044	RAPGEF4
P59266	Fitm2	ENSMUSG00000048486	FITM2
O88845;Q3TR91;O88845-3	Akap10	ENSMUSG00000047804	AKAP10
Q3U487	Hectd3	ENSMUSG00000046861	HECTD3
Q566K0;P17095;Q3TE85	Hmga1	ENSMUSG00000046711	HMGA1
Supplemental file 1 continued
Protein ID	Gene name	Gene ID or gene number	Human orthologue
Q8C4B4;Q8C4B4-2	Unc119b	ENSMUSG00000046562	UNC119B
Q3UK83;Q3U7F3;Q3TIK8;Q5EBP8;P49312;Q3TFB1;P49312-2	Hnrnpa1	ENSMUSG00000046434	HNRNPA1
Q3UAP1;Q9WUQ2;D3Z3S1	Preb	ENSMUSG00000045302	PREB
Q4VAI2;Q9D358	Acp1	ENSMUSG00000044573	ACP1
Q8C298;E9Q179;Q8C5Q4	Grsf1	ENSMUSG00000044221	GRSF1
B2RX64;Q571E5;B7ZWH8	Prss53	ENSMUSG00000044139	PRSS53
Q8R3Y8-2;Q8R3Y8	Irf2bp1	ENSMUSG00000044030	IRF2BP1
P70399;P70399-3	Tp53bp1	ENSMUSG00000043909	TP53BP1
Q3TIU4	Pde12	ENSMUSG00000043702	PDE12
E9Q933;Q8BK08	Tmem11	ENSMUSG00000043284	TMEM11
Q52L87;P68373;Q3TIZ0	Tuba1c	ENSMUSG00000043091	TUBA1C
Q561M4;Q3UDC3;O88746	Tom1	ENSMUSG00000042870	TOM1
Q9JHC0	Gpx2	ENSMUSG00000042808	GPX2
D3Z7X0;D3Z2B3	Acad12	ENSMUSG00000042647	ACAD10
P70227	Itpr3	ENSMUSG00000042644	ITPR3
O70305-2;E9QM77;O70305;O70305-3;F6U2C2;Q3UX07;F7B6X4;Q3UX51	Atxn2	ENSMUSG00000042605	ATXN2
Q60520;Q60520-1	Sin3a	ENSMUSG00000042557	SIN3A
Q3TK27;Q8CI11;Q8CI11-2	Gnl3	ENSMUSG00000042354	GNL3
E9Q7L3;D3Z1W6;E9Q7L2;D3Z1N4;E9Q4Y5;F8VQD1;Q8BSQ9-2;Q8BSQ9;D3YYF2;D6RIL0;D6RI94;D3Z3R4;F6THL5	Pbrm1	ENSMUSG00000042323	PBRM1
Q3V3R4;Q3V391;Q05DI0	Itga1	ENSMUSG00000042284	ITGA1
Q3THL5;Q80X73	Pelo	ENSMUSG00000042275	PELO
B2RQR5;Q3TDT4;Q8BPQ7;D3Z7V4;D3YUT7	Sgsm1	ENSMUSG00000042216	SGSM1
E9Q481;Q6P2K6	Ppp4r3a	ENSMUSG00000041846	PPP4R3A
Q5SVI5;P52792;Q5SVI6;P52792-2	Gck	ENSMUSG00000041798	GCK
P12968	Iapp	ENSMUSG00000041681	IAPP
Q6V4S5	Sdk2	ENSMUSG00000041592	SDK2
Q8QZS1;E0CX19	Hibch	ENSMUSG00000041426	HIBCH
B2RVP5;Q3THW5;P0C0S6;Q8R029;Q3TFU6;Q3UA95	H2az2	ENSMUSG00000041126	H2AZ2
Q7TNG5;E9QK48;Q7TNG5-2;D3YWS2;D6RGM3	Eml2	ENSMUSG00000040811	EML2
Q8VDM6-2;Q8VDM6	Hnrnpul1	ENSMUSG00000040725	HNRNPUL1
E9QN47;Q80U28-14;A2AGQ7;A2AGR0;A2AGQ5;A2AGQ4;Q80U28-3;Q80U28-15;Q80U28;Q80U28-8;Q80U28-4;Q80U28-2;A6PWP8;Q80U28-13	Madd	ENSMUSG00000040687	MADD
E9Q9J4;Q6ZQB6-3;Q6ZQB6;Q6ZQB6-2;Q80V47	Ppip5k2	ENSMUSG00000040648	PPIP5K2
K3W4R5;A2AGT5-3;A2AGT5;Z4YL78;A2AGT5-2;Q80U79	Ckap5	ENSMUSG00000040549	CKAP5
Q8K4R4-2;X1WI19;Q8BTD8;Q8K4R4-3;Q8K4R4;Q8K4R4-4	Pitpnc1	ENSMUSG00000040430	PITPNC1
A2AFS3	Elapor1	ENSMUSG00000040412	ELAPOR1
Q6NZR5;Q3TW36;Q8CDP6;O70349;Q8R3X0;Q3TE28	Skiv2l	ENSMUSG00000040356	SKIV2L
S4R2J9;Q3TLH4-5;Q3TLH4;S4R294	Prrc2c	ENSMUSG00000040225	PRRC2C
B2RUS7;Q8BNE2;Q6PGE2;Q9Z2P1	Abcc8	ENSMUSG00000040136	ABCC8
Q91YT7;Q3UNH5	Ythdf2	ENSMUSG00000040025	YTHDF2
Q542C3;P59114	Pcif1	ENSMUSG00000039849	PCIF1
Q5U458;E9Q8B3	Dnajc11	ENSMUSG00000039768	DNAJC11
P60670;Q3UE06;Q3UDU9;P60670-2	Nploc4	ENSMUSG00000039703	NPLOC4
Q543N6;P58389;Q8C0E1;A2AWE9;A2AWF0	Ptpa	ENSMUSG00000039515	PTPA
Q8R0G9;Q8CDZ5	Nup133	ENSMUSG00000039509	NUP133
Q80UI9;Q3TDI2;P56695;Q3UN10	Wfs1	ENSMUSG00000039474	WFS1
Q91X52;A2AC16	Dcxr	ENSMUSG00000039450	DCXR
G3X972;Q80U83;Q3V222;Q8R2V9	Sec24c	ENSMUSG00000039367	SEC24C
Q9QXV0	Pcsk1n	ENSMUSG00000039278	PCSK1N
Q3UD03;Q3U199;Q3TCV9;Q6NSR8	Npepl1	ENSMUSG00000039263	NPEPL1
E9QLB2;Q3UFF7	Lyplal1	ENSMUSG00000039246	LYPLAL1
Q8BYA0	Tbcd	ENSMUSG00000039230	TBCD
Q9Z2H7	Gipc2	ENSMUSG00000039131	GIPC2
P97449;Q3UP74;Q3TB69	Anpep	ENSMUSG00000039062	ANPEP
Supplemental file 1 continued
Protein ID	Gene name	Gene ID or gene number	Human orthologue
Q9D0A3	Arpin	ENSMUSG00000039043	ARPIN-AP3S2
Q9WVJ3-2;Q9WVJ3;Q3U496	Cpq	ENSMUSG00000039007	CPQ
Q8C1L7;Q9CQR2	Rps21	ENSMUSG00000039001	RPS21
Q80U95	Ube3c	ENSMUSG00000039000	UBE3C
Q8C9B9	Dido1	ENSMUSG00000038914	DIDO1
Q5BLK0;P35979;Q8C2K0;Q3TIQ2	Rpl12	ENSMUSG00000038900	RPL12
E9Q8A3;Q8BKC8-2;Q8BKC8;Q8BKC8-3	Pi4kb	ENSMUSG00000038861	PI4KB
Q8BM55;D3Z6S1;Q8BM55-3;Q8BM55-2	Tmem214	ENSMUSG00000038828	TMEM214
Q5RL55;Q6P542	Abcf1	ENSMUSG00000038762	ABCF1
B7ZMR0;Q76LS9-2;Q76LS9	Mindy1	ENSMUSG00000038712	MINDY1
P56135;F8WHP8	Atp5j2	ENSMUSG00000038690	ATP5MF
Q8BXL7;E9PZK7	Arfrp1	ENSMUSG00000038671	ARFRP1
P60840-2;P60840;P60840-3	Ensa	ENSMUSG00000038619	ENSA
Q9JIS5	Sv2a	ENSMUSG00000038486	SV2A
Q80U12;Q80U12-2	Sgsm2	ENSMUSG00000038351	SGSM2
Q8BJT9;Q8BJR2;Q91VV3;Q8BK85	Edem2	ENSMUSG00000038312	EDEM2
Q9D7E3	Ovca2	ENSMUSG00000038268	OVCA2
B2RXC1	Trappc11	ENSMUSG00000038102	TRAPPC11
Q8VDN4;D3YUR9	Ccdc92	ENSMUSG00000037979	CCDC92
Q5F2E7;Q5F2E7-2	Nufip2	ENSMUSG00000037857	NUFIP2
Q3U7P6;Q05915;Q3UC70	Gch1	ENSMUSG00000037580	GCH1
Q922B3;Q3UDC5	Icam1	ENSMUSG00000037405	ICAM1
O88712-2;O88712;O88712-3	Ctbp1	ENSMUSG00000037373	CTBP1
Q99MR6-3;Q99MR6-4;Q99MR6-2;Q99MR6	Srrt	ENSMUSG00000037364	SRRT
E9Q0R0;B1ATV4;Q3V165;B1ATV6;B1ATV5;Q8K2G4-2;Q8K2G4	Bbs7	ENSMUSG00000037325	BBS7
Q543N5;Q9QYB1	Clic4	ENSMUSG00000037242	CLIC4
Q6GQU1;Q3UPC4;Q3TJE3;P17710-3;Q3UE51;G3UVV4;P17710-4;P17710;P17710-2;Q3TTB4	Hk1	ENSMUSG00000037012	HK1
B2RRE7	Otud4	ENSMUSG00000036990	OTUD4
Q8BQ47;D3Z0T5	Cnpy4	ENSMUSG00000036968	CNPY4
Q6ZPU9;H3BIY2;E0CXJ9;Q6ZPU9-2	Kifbp	ENSMUSG00000036955	KIFBP
B1AU25;Q9Z0X1;Q2QKE3	Aifm1	ENSMUSG00000036932	AIFM1
P68372;Q9CVR0;Q9DCR1	Tubb4b	ENSMUSG00000036752	TUBB4B
Q8CJG0;Q8CGT9;Q6P239;Q8R3Q7;Q6PHA2	Ago2	ENSMUSG00000036698	AGO2
Q923C1;A2AJ15;Q8BTW7	Man1b1	ENSMUSG00000036646	MAN1B1
Q6RUT9;O70496;Q8CCI9;E9PYL4	Clcn7	ENSMUSG00000036636	CLCN7
Q9CTE8;Q9DB25	Alg5	ENSMUSG00000036632	ALG5
Q8K1L5	Ppp1r11	ENSMUSG00000036398	PPP1R11
Q6ZWZ2	Ube2r2	ENSMUSG00000036241	UBE2R2
Q9ERS2	Ndufa13	ENSMUSG00000036199	NDUFA13
Q5SZA3;P15864	H1f2	ENSMUSG00000036181	H1-2
E9QMN5;Q8CHY6	Gatad2a	ENSMUSG00000036180	GATAD2A
Q6P5C5;Q3T9H8	Smug1	ENSMUSG00000036061	SMUG1
Q6PB44-2;Q6PB44	Ptpn23	ENSMUSG00000036057	PTPN23
Q8C0L8	Cog5	ENSMUSG00000035933	COG5
Q545I7;P01325	Ins1	ENSMUSG00000035804	INS
B2RRC5;A2AWA9	Rabgap1	ENSMUSG00000035437	RABGAP1
A1ILG8;Q8BX70;Q8BX70-3;Q8BX70-2	Vps13c	ENSMUSG00000035284	VPS13C
Q3U896;Q9Z2D0	Mtmr9	ENSMUSG00000035078	MTMR9
Q3UMF0-3;B1AZ15;B1AZ14;Q3UMF0-4;Q3UMF0-2;Q3UMF0	Cobll1	ENSMUSG00000034903	COBLL1
Q8K133;Q0PD31;P35290	Rab24	ENSMUSG00000034789	RAB24
Q3TRK3;Q9QXS6-3;Q9QXS6;Q9QXS6-2	Dbn1	ENSMUSG00000034675	DBN1
I7HPW8;F6YB52	Myo15b	ENSMUSG00000034427	MYO15B
Q9CV53;Q91WK5	Gcsh	ENSMUSG00000034424	GCSH
Supplemental file 1 continued
Protein ID	Gene name	Gene ID or gene number	Human orthologue
Q3UXQ1;Q05CG5;O55176;B1AXU3;B1AXU4;O55176-5;O55176-4;O55176-2	Pja1	ENSMUSG00000034403	PJA1
Q9D486-3;Q9D486;B2RY70;Q9D486-2	Cmip	ENSMUSG00000034390	CMIP
Q5SVF7;O55125;Q3UGS1;Q5SVG6	Nipsnap1	ENSMUSG00000034285	NIPSNAP1
Q8R3P6;Q8R3P6-2	Ints14	ENSMUSG00000034263	INTS14
P46460	Nsf	ENSMUSG00000034187	NSF
Q8K3X4	Irf2bpl	ENSMUSG00000034168	IRF2BPL
E9PU87;F6S7W6;Q6P4S6;F6U6U5;F6U8X4;Q6P4S6-2	Sik3	ENSMUSG00000034135	SIK3
Q8R3G9	Tspan8	ENSMUSG00000034127	TSPAN8
B9EKJ7;P58871;Z4YJL4	Tnks1bp1	ENSMUSG00000033955	TNKS1BP1
Q8K2C9	Hacd3	ENSMUSG00000033629	HACD3
Q6A0A2;Q6A0A2-2;Q6A0A2-3	Larp4b	ENSMUSG00000033499	LARP4B
Q8K2I1;D3YWJ4	Fntb	ENSMUSG00000033373	CHURC1-FNTB
Q8BFW7;Q8BFW7-4;Q8BFW7-5	Lpp	ENSMUSG00000033306	LPP
Q5EBQ2;P70296;Q3TGC5;D3Z1V4;D6RHS6	Pebp1	ENSMUSG00000032959	PEBP1
Q7TQH0-2;Q7TQH0-3;Q7TQH0;Q3TGG2;E9Q5Q0;Q3TYH7	Atxn2l	ENSMUSG00000032637	ATXN2L
Q921M8;Q3TEX8;P35123;Q6NXV6;Q5DTK8;Q3TPN5	Usp4	ENSMUSG00000032612	USP4
Q8BML9;Q8BU21;Q3TN94;D3Z158;Q3TIN2;Q8R1V9	Qars	ENSMUSG00000032604	QARS1
Q8K1M3;P12367	Prkar2a	ENSMUSG00000032601	PRKAR2A
Q8R146-2;Q8R146	Apeh	ENSMUSG00000032590	APEH
Q5DTS4;S4R1W5;Q8R388;O88720;Q3ULB0	Rbm6	ENSMUSG00000032582	RBM6
Q4VA21;Q3TQM5;Q8BH16	Fbxl2	ENSMUSG00000032507	FBXL2
P27546-2;P27546;P27546-3;E9PZ43	Map4	ENSMUSG00000032479	MAP4
Q80YA7	Dpp8	ENSMUSG00000032393	DPP8
Q8BHI7;D3Z0Z6;D3Z136	Elovl5	ENSMUSG00000032349	ELOVL5
Q3TE95;Q8BP92	Rcn2	ENSMUSG00000032320	RCN2
P41241;Q3UVH2;Q8BIS9	Csk	ENSMUSG00000032312	CSK
F8WIE1;Q8BWY6;Q3ZCX9;Q91W89;E9PZ88;Q3TBQ3;E9PYM7	Man2c1	ENSMUSG00000032295	MAN2C1
Q2M4G8;O35239	Ptpn9	ENSMUSG00000032290	PTPN9
G3X915;Q9D7V2	Lysmd2	ENSMUSG00000032184	LYSMD2
Q99L41;Q3UPG1;Q3UBC6;P22907-2;P22907	Hmbs	ENSMUSG00000032126	HMBS
Q80X80;Q8CAA2;Q3U590;Q9DBJ2;Q6PHC0;Q80U48;Q8CFV7	C2cd2l	ENSMUSG00000032120	C2CD2L
F8WIG4;Q3TI08;Q3TY03;Q62384;F8WHU9;Q9JJA1;Q3TIH8;Q9CUE2;Q8C8U3	Zpr1	ENSMUSG00000032078	ZPR1
Q8VEB4	Pla2g15	ENSMUSG00000031903	PLA2G15
Q8R1U1;G3UWH9;Q7TSQ9	Cog4	ENSMUSG00000031753	COG4
Q8CBB7;Q3UKX8;P22892;Q8CC03	Ap1g1	ENSMUSG00000031731	AP1G1
Q8BHC2;Q9CX00	Ist1	ENSMUSG00000031729	IST1
Q99LG2;Q3U316;E9PV58;Q3U1S0	Tnpo2	ENSMUSG00000031691	TNPO2
Q3UTJ2	Sorbs2	ENSMUSG00000031626	SORBS2
P18581-2;E9QJY0;P18581	Slc7a2	ENSMUSG00000031596	SLC7A2
Q78P93;Q3U646;Q9WV54;Q3U8A7;Q3TWT5	Asah1	ENSMUSG00000031591	ASAH1
Q61733	Mrps31	ENSMUSG00000031533	MRPS31
E9PXE2;Q3UHQ9;G3UX72;E9PXE1;Q6PDM6;D3YUF3;D3YUF4;G3UXP9;E9Q863;E9PY13;E9PY12;E9QPM7;Q003U3;Q64096;G3UYM8;Q80U26;F6VR53	Mcf2l	ENSMUSG00000031442	MCF2L
Q499D4;Q3TM67;Q9ESX5;Q3TI79;B7ZCL7;F6YUI5	Dkc1	ENSMUSG00000031403	DKC1
B7ZCL8;Q542P4;P70290;Q684Q6;A2AN84;B7ZCL9	Mpp1	ENSMUSG00000031402	MPP1
I7HPY1;I7HLV5;Q9D8T0;I7HJS7;J3JS95	Fam3a	ENSMUSG00000031399	FAM3A
Q9Z2D6-2;Q9Z2D6	Mecp2	ENSMUSG00000031393	MECP2
Q684Q8;B1AUY7;Q540H0;Q9QY36;B1AUY8;B1AUY9;B1AUZ1	Naa10	ENSMUSG00000031388	NAA10
Q61191;B1AUX2	Hcfc1	ENSMUSG00000031386	HCFC1
B9EKP5;B7FAU9;Q8BTM8;B7FAV1;Q6KAM8	Flna	ENSMUSG00000031328	FLNA
A2AQW0	Map3k15	ENSMUSG00000031303	MAP3K15
Q3UFJ3;P35486	Pdha1	ENSMUSG00000031299	PDHA1
Q0PD14;Q8BHC1	Rab39b	ENSMUSG00000031202	RAB39B
P46737;P46737-2	Brcc3	ENSMUSG00000031201	BRCC3
Supplemental file 1 continued
Protein ID	Gene name	Gene ID or gene number	Human orthologue
Q9D6K8	Fundc2	ENSMUSG00000031198	FUNDC2
A3KMJ8;P61759;Q3TIR6	Vbp1	ENSMUSG00000031197	VBP1
Q6A028	Swap70	ENSMUSG00000031015	SWAP70
A0A067XG53;B9EJ23;B7ZP42;O70589-3;O70589-4;O70589-5;O70589;O70589-2	Cask	ENSMUSG00000031012	CASK
Q0VDQ3;Q9D733;Q9D6X7	Gp2	ENSMUSG00000030954	GP2
P70452	Stx4a	ENSMUSG00000030805	STX4
Q91W34;D6RDS0;Q91W34-2	Rusf1	ENSMUSG00000030780	RUSF1
Q9JIF7	Copb1	ENSMUSG00000030754	COPB1
Q3TS44;Q9R1P4	Psma1	ENSMUSG00000030751	PSMA1
Q8R1B4;Q66JU1	Eif3c	ENSMUSG00000030738	EIF3CL
Q91WG2;Q91WG2-2;Q91WG2-1;Q3TZJ2	Rabep2	ENSMUSG00000030727	RABEP2
Q3U232;Q3U1N0;O89053;Q3U9K3;Q3T9L1;G3UYK8	Coro1a	ENSMUSG00000030707	CORO1A
Q0VG22;Q9JMD3;Q52LA1;E9PVP0;Q5RL65;Q6PDD6;Q66JR2;G3UYM0;G3UY59;G3UW37;G3UY87;G3V020	Stard10	ENSMUSG00000030688	STARD10
E9QLQ3;Q61409	Pde3b	ENSMUSG00000030671	PDE3B
P81117	Nucb2	ENSMUSG00000030659	NUCB2
B0LAE4;Q3UBA1;Q3TQE3;Q8C1Y9;Q80ZW9;Q3TIC7;Q3THR3;Q9JKW0	Arl6ip1	ENSMUSG00000030654	ARL6IP1
P54071	Idh2	ENSMUSG00000030541	IDH2
Q8C076;P59016	Vps33b	ENSMUSG00000030534	VPS33B
Q8CFZ2;Q62030;E9Q4D0;F6XJP7;H3BJL4	Pcsk6	ENSMUSG00000030513	PCSK6
Q7TMB8-2;Q7TMB8	Cyfip1	ENSMUSG00000030447	CYFIP1
Q80XR5;P26369;Q505Q1;Q922I0;Q3KQM4	U2af2	ENSMUSG00000030435	U2AF2
Q3U3S0;P58404-2;P58404	Strn4	ENSMUSG00000030374	STRN4
Q8BJA6;Q3UY68;Q91YS8;Q3TDH8	Camk1	ENSMUSG00000030272	CAMK1
Q3UJN2;Q3U1C2;P60122	Ruvbl1	ENSMUSG00000030079	RUVBL1
Q5RKP4;Q91YQ5;Q8BMR3;Q3U900;Q99LY0	Rpn1	ENSMUSG00000030062	RPN1
Q9QZE5	Copg1	ENSMUSG00000030058	COPG1
Q3UME9;Q3U026;Q80UM7;Q3U950;Q3U8P9	Mogs	ENSMUSG00000030036	MOGS
E9QML5;Q61464-4;Q61464;E9QKZ7;Q61464-7;Q61464-2;Q61464-5;Q3TNM0;Q3TZK9;Q3TQM2;Q3TQ35	Zfp638	ENSMUSG00000030016	ZNF638
Q7TMN7	Anxa4	ENSMUSG00000029994	ANXA4
Q9CZD3	Gars	ENSMUSG00000029777	GARS1
Q3U9V4;P62880;E9QKR0;D3YZX3;D3Z1M1;D3Z1T4	Gnb2	ENSMUSG00000029713	GNB2
H3BKT0;H3BJN3;Q6AXG1;Q9JJB6;H3BJ26;H3BLJ7	Cux1	ENSMUSG00000029705	CUX1
P52946	Pdx1	ENSMUSG00000029644	PDX1
B2RTB0;Q3UHX2;Q1WWJ8	Pdap1	ENSMUSG00000029623	PDAP1
Q3TCE7;Q91Z25;Q9WV32;Q3U094;Q3TBA2	Arpc1b	ENSMUSG00000029622	ARPC1B
Q9R0Q6	Arpc1a	ENSMUSG00000029621	ARPC1A
P57759	Erp29	ENSMUSG00000029616	ERP29
Q3UY34	2210016L21Rik	ENSMUSG00000029559	C12orf43
Q9WTX8;Q9WTX8-2	Mad1l1	ENSMUSG00000029554	MAD1L1
Q8K370;Q9CRH8	Acad10	ENSMUSG00000029456	ACAD10
Q544B1;Q3UJW1;Q3U9J7;Q3TVM2;P47738;Q3U6I3	Aldh2	ENSMUSG00000029455	ALDH2
S4R2L4;B7ZNU2;S4R265;A2RTL5;S4R1M5	Rsrc2	ENSMUSG00000029422	RSRC2
D3YXR8;Q80U40-2;Q80U40	Rimbp2	ENSMUSG00000029420	RIMBP2
Q9JJ59;Q9JJ59-2	Abcb9	ENSMUSG00000029408	ABCB9
E9PYJ7;Q6ZPQ6-2;Q6ZPQ6;Q6NS55;Q3UEE4	Pitpnm2	ENSMUSG00000029406	PITPNM2
Q9D394-2	Rufy3	ENSMUSG00000029291	RUFY3
Q3TM92;Q91W96;Q3TI31	Anapc4	ENSMUSG00000029176	ANAPC4
Q9EQF6	Dpysl5	ENSMUSG00000029168	DPYSL5
Q2UZW7;Q6PER3	Mapre3	ENSMUSG00000029166	MAPRE3
Q99K41;Q3U254;Q3USG5;Q3UUU0	Emilin1	ENSMUSG00000029163	EMILIN1
E9Q1Q9;P97328;Q9CPP1;D3YVB6	Khk	ENSMUSG00000029162	KHK
Q9CRD0;Q9CRD0-2;Q9CRD0-3	Ociad1	ENSMUSG00000029152	OCIAD1
Q3TCW5;Q99J45;D3YUV1	Nrbp1	ENSMUSG00000029148	NRBP1
Supplemental file 1 continued
Protein ID	Gene name	Gene ID or gene number	Human orthologue
Q61074	Ppm1g	ENSMUSG00000029147	PPM1G
Q8BVL3	Snx17	ENSMUSG00000029146	SNX17
D3Z780;Q61749;Q61749-2	Eif2b4	ENSMUSG00000029145	EIF2B4
E9PX68;Q5BKS1;O54716;E9Q585;Q3UHY0;E9Q1Q0;Q3UUI2;Q6GQW1	Slc4a1ap	ENSMUSG00000029141	SLC4A1AP
B1AX98;E9PV22;Q505F5	Lrrc47	ENSMUSG00000029028	LRRC47
Q542V3;Q8VE97;Q8K3A8;A2A837	Srsf4	ENSMUSG00000028911	SRSF4
P48193;A2A841;P48193-2;A2A842;A2AD32;B6ZHC8	Epb41	ENSMUSG00000028906	EPB41
Q58E59;Q9D554	Sf3a3	ENSMUSG00000028902	SF3A3
Q3U5F4	Yrdc	ENSMUSG00000028889	YRDC
Q923G3;P47757-2;A2AMW0;P47757-4;Q3TVK4;Q3TRH8;P47757;F7CAZ6	Capzb	ENSMUSG00000028745	CAPZB
B1AU76;B1AU75;Q99MD9-2;Q99MD9	Nasp	ENSMUSG00000028693	NASP
Q540D7;Q9JII6;Q80XJ7;Q3UJW9;B1AXW3	Akr1a1	ENSMUSG00000028692	AKR1A1
P35700;B1AXW5;B1AXW6;Q3U9J9;B1AXW4	Prdx1	ENSMUSG00000028691	PRDX1
B1ARU4;E9PVY8;E9QA63;Q9QXZ0;E9QNP1;Q9QXZ0-3;Q9QXZ0-2;Q9QXZ0-4;F6Q750	Macf1	ENSMUSG00000028649	MACF1
P32020;P32020-2	Scp2	ENSMUSG00000028603	SCP2
Q3TLP5;Q3TLP5-2;F6YTG0;Q3TLP5-3	Echdc2	ENSMUSG00000028601	ECHDC2
E9PX48;A2A9M5;Q8R1A4-2;Q8R1A4	Dock7	ENSMUSG00000028556	DOCK7
A2ACP1-2;A2ACP1	Ttc39a	ENSMUSG00000028555	TTC39A
Q3U054;Q9D153;Q60772	Cdkn2c	ENSMUSG00000028551	CDKN2C
Q7TT37	Elp1	ENSMUSG00000028431	ELP1
Q9D7S9	Chmp5	ENSMUSG00000028419	CHMP5
F6TCF9;Q60739-2;Q60739;Q9CUY1	Bag1	ENSMUSG00000028416	BAG1
Q5NTY0;Q3TK61;P63037;B1AXY1;B1AXY0	Dnaja1	ENSMUSG00000028410	DNAJA1
Q9DCV4;A2AGJ2	Rmdn1	ENSMUSG00000028229	RMDN1
Q9CQB5	Cisd2	ENSMUSG00000028165	CISD2
Q8K2I4	Manba	ENSMUSG00000028164	MANBA
P25799;P25799-4;P25799-2;P25799-3	Nfkb1	ENSMUSG00000028163	NFKB1
P48678;P48678-2;P48678-3	Lmna	ENSMUSG00000028063	LMNA
Q9JHS3;D3YTS4	Lamtor2	ENSMUSG00000028062	LAMTOR2
H3BJU7;H3BJX8;H3BJ45;H3BJ40;H3BKH9;Q60875-5;Q60875-4;Q60875;Q3TYZ4;Q60875-2;Q60875-3	Arhgef2	ENSMUSG00000028059	ARHGEF2
B9EJR4;O35387	Hax1	ENSMUSG00000027944	HAX1
Q8CAQ1;G3X9Q0;Q9JKP5;Q8CHF5	Mbnl1	ENSMUSG00000027763	MBNL1
Q3TEB9;Q6NX62;Q6PCW8;Q546F8;Q571G2;Q9D753;F6SGT4;D3YYN3	Exosc8	ENSMUSG00000027752	EXOSC8
P14246	Slc2a2	ENSMUSG00000027690	SLC2A2
Q541E2;Q3TWM2;P51855;Q8R436	Gss	ENSMUSG00000027610	GSS
Q8N9U3;Q8C1A8;Q8C141;A2AQN4;Q9QXG4;Q8C113;A2AQN5	Acss2	ENSMUSG00000027605	ACSS2
Q6P289;Q571M5;Q8C863;Q8C863-2	Itch	ENSMUSG00000027598	ITCH
Q8VDM1;F7C2Y9	Zgpat	ENSMUSG00000027582	ZGPAT
B5B2P6;B5B2Q2;B5B2P7;Q60591-4;Q60591-2;Q60591;B5B2P8;B5B2Q4;Q3TTU8;B5B2Q6;A2AQC8;B5B2R5;Q8C443;Q6P3F6	Nfatc2	ENSMUSG00000027544	NFATC2
P63094;Q6R0H7;P63094-3	Gnas	ENSMUSG00000027523	GNAS
Q3TYS4;Q9D662;Q3TAW4;Q3UKB4;Q3TIS3;Q8CDS4	Sec23b	ENSMUSG00000027429	SEC23B
Q80VD1	Fam98b	ENSMUSG00000027349	FAM98B
Q3UA17;Q791V5;A2AFW6;Q9D050;Q05C68	Mtch2	ENSMUSG00000027282	MTCH2
Q99K28;Q99K28-2	Arfgap2	ENSMUSG00000027255	ARFGAP2
A2ARP8;Q9QYR6;Q9QYR6-2	Map1a	ENSMUSG00000027254	MAP1A
P27773	Pdia3	ENSMUSG00000027248	PDIA3
Q8BQW4;A2AH25;Q5FWK3;Q8C5A0	Arhgap1	ENSMUSG00000027247	ARHGAP1
Q3V3N6;P61202;P61202-2;A2AQE4;Q3UK65	Cops2	ENSMUSG00000027206	COPS2
A2AQ53;O88840;Q61554;Q60784	Fbn1	ENSMUSG00000027204	FBN1
Q8C6E3;Q542K4;Q3UZE7;Q3TVZ1;P24270;Q3UF58;Q91XI2	Cat	ENSMUSG00000027187	CAT
A2AIX1;E9QAT4;Q811L5;Q80U43;F7BPW6	Sec16a	ENSMUSG00000026924	SEC16A
Q3TUI3;Q8K2F0;Q05DR7;Q4G5Y4;Q5CCJ9;Q8K2F0-2;A2AKA9;Q53TY6	Brd3	ENSMUSG00000026918	BRD3
Q91WM1-2;Q91WM1;Q8C5B7	Strbp	ENSMUSG00000026915	STRBP
Supplemental file 1 continued
Protein ID	Gene name	Gene ID or gene number	Human orthologue
Q6PAC1;P13020-2;Q3UCW8;P13020;Q3U9Q8;Q3TGJ9	Gsn	ENSMUSG00000026879	GSN
Q6Q477;D1FNM9;Q32ME1;F7AAP4;D1FNM8;H2BL43;E9Q828	Atp2b4	ENSMUSG00000026463	ATP2B4
A0A087WRY3;Q80XU3	Nucks1	ENSMUSG00000026434	NUCKS1
Q3TDQ5;G9M4M6;Q8C0J2-2;Q8C0J2-5;Q8C0J2;Q8C0J2-3;Q8C0J2-4;Q3TQX8	Atg16l1	ENSMUSG00000026289	ATG16L1
Q3V2C6;Q3V1K9;P31001	Des	ENSMUSG00000026208	DES
Q9JKY0	Cnot9	ENSMUSG00000026174	CNOT9
E9PUC4;Q6NSW3-2;Q6NSW3;Q6NSW3-3;Q6NSW3-4	Sphkap	ENSMUSG00000026163	SPHKAP
Q9JKX6	Nudt5	ENSMUSG00000025817	NUDT5
P09055;P09055-2	Itgb1	ENSMUSG00000025809	ITGB1
Q3TIC8;Q9CZ13;Q3THM1;Q8K2S8	Uqcrc1	ENSMUSG00000025651	UQCRC1
Q8R4N0	Clybl	ENSMUSG00000025545	CLYBL
Q3UUH0;Q91YI0;E0CXM2;E0CY49	Asl	ENSMUSG00000025533	ASL
O35566	Cd151	ENSMUSG00000025510	CD151
P99027	Rplp2	ENSMUSG00000025508	RPLP2
B2RT97;Q9WVJ2;E9Q5I9	Psmd13	ENSMUSG00000025487	PSMD13
Q3TIR3	Ric8a	ENSMUSG00000025485	RIC8A
O35153;I6L979	Bet1l	ENSMUSG00000025484	BET1L
Q8R2K1;D3YWS7;F6SJM7;Q8R2K1-2;Q8R2K1-3;Q8R2K1-5;Q8R2K1-4;F6X9P4	Fuom	ENSMUSG00000025466	FUOM
Q03265;D3Z6F5	Atp5a1	ENSMUSG00000025428	ATP5F1A
Q3TPZ5;Q99KJ8	Dctn2	ENSMUSG00000025410	DCTN2
Q99K87;Q3TFD0;Q9CZN7	Shmt2	ENSMUSG00000025403	SHMT2
Q3UID0;Q6PDG5-2;Q6PDG5	Smarcc2	ENSMUSG00000025369	SMARCC2
Q3TGU7;P50580;Q05BN2;Q3UMW2;D3YVH7	Pa2g4	ENSMUSG00000025364	PA2G4
Q497N1;P62855	Rps26	ENSMUSG00000025362	RPS26
P70122;F6TN03	Sbds	ENSMUSG00000025337	SBDS
Q9QXE7	Tbl1x	ENSMUSG00000025246	TBL1X
Q9JHQ5;Q8CDG8;Q3UHL8;F6VG18;F6VTH5	Lztfl1	ENSMUSG00000025245	LZTFL1
Q8VDC1	Fyco1	ENSMUSG00000025241	FYCO1
Q9EQQ9-3;Q9EQQ9	Oga	ENSMUSG00000025220	OGA
Q8CI33;Q8CI33-2	Cwf19l1	ENSMUSG00000025200	CWF19L1
Q91X78	Erlin1	ENSMUSG00000025198	ERLIN1
Q6P264;Q7TQJ3;Q9ER35	Fn3k	ENSMUSG00000025175	FN3K
Q3TWE3;Q3THC3;Q3TF72;P09103;Q3URP6;Q3UBY9;Q3UJA8;Q3UA23;Q3TIM0;Q3TGS0;Q3UDR2;Q3U738;Q3TT76	P4hb	ENSMUSG00000025130	P4HB
G3X9J6;E9Q9M1;Q3V1L4	Nt5c2	ENSMUSG00000025041	NT5C2
O89116	Vti1a	ENSMUSG00000024983	VTI1A
Q61823	Pdcd4	ENSMUSG00000024975	PDCD4
Q3UWS9;Q3U7H9;P99029-2;P99029;G3UZJ4;H3BJQ7;Q9D6X2	Prdx5	ENSMUSG00000024953	PRDX5
R4H4V1;R4H4Y7;Q9EQC5	Scyl1	ENSMUSG00000024941	SCYL1
Q91XB7	Yif1a	ENSMUSG00000024875	YIF1A
Q0PD66;Q9D1G1	Rab1b	ENSMUSG00000024870	RAB1B
Q3UJB0;Q3UAI4;Q80W39;Q3UBH2;Q3UQU5;Q8BL33	Sf3b2	ENSMUSG00000024853	SF3B2
Q91Z50;Q8R069;Q8C952;Q3TGH6;Q8C5X6;Q99M86;P39749	Fen1	ENSMUSG00000024742	FEN1
P30677;Q8CBT5;Q8C3M7	Gna14	ENSMUSG00000024697	GNA14
Q3UHH5;P21279	Gnaq	ENSMUSG00000024639	GNAQ
Q06180-2;Q06180;D3Z6W2	Ptpn2	ENSMUSG00000024539	PTPN2
Q9D8V7;Q8BM48	Sec11c	ENSMUSG00000024516	SEC11C
Q3TKB7;Q3THT9;Q99N84;G3UYQ9;G3UYX8;Q542W5;G3UX79;Q99N84-2	Mrps18b	ENSMUSG00000024436	MRPS18B
P36916;A2VDH5;Q52KE3;P36916-2	Gnl1	ENSMUSG00000024429	GNL1
Q5DTJ4;Q7TSC1	Prrc2a	ENSMUSG00000024393	PRRC2A
N0E4C0;P67871;N0E4C5;G3UXG7;G3UZJ5;N0E463;G3UXU2	Csnk2b	ENSMUSG00000024387	CSNK2B
Q3UIA1;P19426-2;P19426;G3UY39	Nelfe	ENSMUSG00000024369	NELFE
Q61228;A0A068BGU5;Q61230;Q61229;Q61227	Tap2	ENSMUSG00000024339	TAP2
A0A068BIT8;P28063;G3UZW8	Psmb8	ENSMUSG00000024338	PSMB8
Supplemental file 1 continued
Protein ID	Gene name	Gene ID or gene number	Human orthologue
B2RS09;Q7JJ13-2;Q7JJ13;U3KLT0	Brd2	ENSMUSG00000024335	BRD2
Q14C53;A0A068BIT0;Q31125	Slc39a7	ENSMUSG00000024327	SLC39A7
A0A068BGT0;Q8C754;G3UY33;Q3V3A4;Q8C754-2	Vps52	ENSMUSG00000024319	VPS52
Q5XW48;Q3U9A3;Q3TED6;Q9D679;Q91WI5;Q3TCU5;A0A068BIS1;Q9R233-2;Q9R233;Q5XW51;Q5XW49;Q5XW52;G3UZZ2;Q5XW46	Tapbp	ENSMUSG00000024308	TAPBP
Q4FJN2;Q64378;Q3TX72	Fkbp5	ENSMUSG00000024222	FKBP5
I1E4X7;Q9JI46;H3BLR8;B2KF67	Nudt3	ENSMUSG00000024213	NUDT3
D3Z4C9;Q9CQY6;D3Z4D6	Uqcc2	ENSMUSG00000024208	UQCC2
D5MCW4;Q9CQ89	Cuta	ENSMUSG00000024194	CUTA
Q3TV90;Q9CYI4;Q05D11;D3Z765;Q9CYI4-2	Luc7l	ENSMUSG00000024188	LUC7L
D3Z6P0-2;D3Z6P0	Pdia2	ENSMUSG00000024184	PDIA2
Q059U9;Q9DBR0	Akap8	ENSMUSG00000024045	AKAP8
Q9DBC3	Cmtr1	ENSMUSG00000024019	CMTR1
Q9CPP6;Q9CX78	Ndufa5	ENSMUSG00000023089	NDUFA5
Q3UH60;D3Z5G8;Q3UH60-2	Dip2b	ENSMUSG00000023026	DIP2B
Q3UT02;E9Q066;G3X9Q6;Q8BWW4	Larp4	ENSMUSG00000023025	LARP4
Q9ERG0;Q8C7S2;Q8CD09;Q9ERG0-2;Q8C3R7;Q8BT15	Lima1	ENSMUSG00000023022	LIMA1
Q64737;Q3UJP8;Q3TH49;Q64737-2	Gart	ENSMUSG00000022962	GART
H9KV00;Q9QX47-3;Q9QX47;H9KV15;H9KV01;Q9QX47-4;Q9QX47-2	Son	ENSMUSG00000022961	SON
Q64685;Q9JJM6	St6gal1	ENSMUSG00000022885	ST6GAL1
Q52KC1;P10630;Q8BTU6;E9Q561	Eif4a2	ENSMUSG00000022884	EIF4A2
Q80X54;Q91YJ2	Snx4	ENSMUSG00000022808	SNX4
Q8K0F1	Tbc1d23	ENSMUSG00000022749	TBC1D23
Q99K01-2	Pdxdc1	ENSMUSG00000022680	PDXDC1
Q8C3X8	Lmf2	ENSMUSG00000022614	LMF2
Q9DCC4	Pycrl	ENSMUSG00000022571	PYCR3
Q80T84;D3Z624;G3XA21;E0CZ22	Mroh1	ENSMUSG00000022558	MROH1
Q8VDD5;Q3UFT0	Myh9	ENSMUSG00000022443	MYH9
Q8BGH2	Samm50	ENSMUSG00000022437	SAMM50
Q921M7	Cyrib	ENSMUSG00000022378	CYRIB
Q8BPS4	Gpr180	ENSMUSG00000022131	GPR180
Q9EPK7-2;Q9EPK7;E9PUW7	Xpo7	ENSMUSG00000022100	XPO7
P98063;Q6P550;Q570Z4	Bmp1	ENSMUSG00000022098	BMP1
Q3TT94;Q6P1F6;Q571J7;Q3TPC5;Q9CWU3	Ppp2r2a	ENSMUSG00000022052	PPP2R2A
E9Q774;E9Q777;Q6ZQ80;Q8BSJ2	Akap11	ENSMUSG00000022016	AKAP11
P40142	Tkt	ENSMUSG00000021957	TKT
Q3TVS6;P10605;Q3TC17;Q6LAF6	Ctsb	ENSMUSG00000021939	CTSB
Q9D958	Spcs1	ENSMUSG00000021917	SPCS1
Q8VE38-2;Q8VE38	Oxnad1	ENSMUSG00000021906	OXNAD1
Q14BR4;P61750;Q9DD04;E9Q798	Arf4	ENSMUSG00000021877	ARF4
D3Z7V3;H7BX64;Q3URD3-2;Q3URD3;F8WIH0;F6UV57;F6YCM8;Q3URD3-5	Slmap	ENSMUSG00000021870	SLMAP
Q64727	Vcl	ENSMUSG00000021823	VCL
Q923F9;E9QPX3;Q9CXZ1;Q9CTT4	Ndufs4	ENSMUSG00000021764	NDUFS4
Q99JI4;Q8C1T2	Psmd6	ENSMUSG00000021737	PSMD6
Q9D0G0	Mrps30	ENSMUSG00000021731	MRPS30
Q544T5;P00375	Dhfr	ENSMUSG00000021707	DHFR2
B9EKK3	Iqgap2	ENSMUSG00000021676	IQGAP2
Q8BSX8;Q9EQG9-2;Q9EQG9;Q9EQG9-3	Cert1	ENSMUSG00000021669	CERT1
Q32MU0;P63239	Pcsk1	ENSMUSG00000021587	PCSK1
Q9CZL5	Pcbd2	ENSMUSG00000021496	PCBD2
Q9DBH5	Lman2	ENSMUSG00000021484	LMAN2
E9QKB2;Q9JKS5	Habp4	ENSMUSG00000021476	HABP4
Q3TV94;Q52PE3;Q9CY50	Ssr1	ENSMUSG00000021427	SSR1
D3Z030;Q6EDY6-3;Q6EDY6;F7AI27	Carmil1	ENSMUSG00000021338	CARMIL1
Supplemental file 1 continued
Protein ID	Gene name	Gene ID or gene number	Human orthologue
Q91WD9	Scgn	ENSMUSG00000021337	SCGN
Q60803;Q3UHM2;Q3UHJ1	Traf3	ENSMUSG00000021277	TRAF3
Q3U6U7;P32921-2;Q3UDG2;Q4FJZ4;P32921	Wars	ENSMUSG00000021266	WARS1
Q3UZJ4;Q61151	Ppp2r5e	ENSMUSG00000021051	PPP2R5E
Q91YP0	L2hgdh	ENSMUSG00000020988	L2HGDH
Q8CCP0;Q8CCP0-2;Q8CCP0-3	Nemf	ENSMUSG00000020982	NEMF
Q543F1;Q3U5Q3;A2AH85;Q6A0E3;O08810;G3UZ34;Q3TMY8;Q7TMX4	Eftud2	ENSMUSG00000020929	EFTUD2
P42232	Stat5b	ENSMUSG00000020919	STAT5B
Q5SUR0	Pfas	ENSMUSG00000020899	PFAS
Q8CHR4;O35619;B0QZN5;P63044	Vamp2	ENSMUSG00000020894	VAMP2
Q5F239;P62254;D6RES1	Ube2g1	ENSMUSG00000020794	UBE2G1
B7ZP20	Ankfy1	ENSMUSG00000020790	ANKFY1
Q04690-2;Q04690;Q04690-4;Q04690-3	Nf1	ENSMUSG00000020716	NF1
Q4FJL0;P61027;Q3U621	Rab10	ENSMUSG00000020671	RAB10
Q542A1;Q61334	Bcap29	ENSMUSG00000020650	BCAP29
A9E3L2;Q9Z2I2;Q80YE1;Q810R7	Fkbp1b	ENSMUSG00000020635	FKBP1B
Q9DBC7;Q3TYK4;Q8C3Z4;Q3UBA7;A2AI69;F8S0Y0	Prkar1a	ENSMUSG00000020612	PRKAR1A
Q9QXB9	Drg2	ENSMUSG00000020537	DRG2
P28661-5;P28661-4;P28661-3;P28661-2;P28661	septin4	ENSMUSG00000020486	SEPTIN4
Q62418-3;Q62418-2;Q62418	Dbnl	ENSMUSG00000020476	DBNL
O35654;A8Y5G7	Pold2	ENSMUSG00000020471	POLD2
Q3U2G2;Q571M2;Q61316	Hspa4	ENSMUSG00000020361	HSPA4
Q8R1K4;Q8R1K4-2;F8WHK6;Q8R1K4-3	Phykpl	ENSMUSG00000020359	PHYKPL
Q62261	Sptbn1	ENSMUSG00000020315	SPTBN1
Q9JMH6-2;Q9JMH6	Txnrd1	ENSMUSG00000020250	TXNRD1
Q3UB66;Q0PD67;P62821	Rab1a	ENSMUSG00000020149	RAB1A
Q80YD1	Supv3l1	ENSMUSG00000020079	SUPV3L1
Q5BKP5;Q99MJ9;Q8BRU5	Ddx50	ENSMUSG00000020076	DDX50
Q9JIK5;Q6PCP0;Q3ULC7;Q9CWZ5;Q8K2L4	Ddx21	ENSMUSG00000020075	DDX21
Q8CH18;Q8CH18-3	Ccar1	ENSMUSG00000020074	CCAR1
Q3TGM7;Q69ZS7;Q3UJ02;Q69ZS7-2	Hbs1l	ENSMUSG00000019977	HBS1L
Q3TNH0;Q61029-3;Q61029-2;Q61033-2	Tmpo	ENSMUSG00000019961	TMPO
K3W4Q9;Q8BH60-2;Q8BH60	Gopc	ENSMUSG00000019861	GOPC
Q8R344	Ccdc12	ENSMUSG00000019659	CCDC12
Q9Z1N5;Q3TB18	Ddx39b	ENSMUSG00000019432	DDX39B
Q6NXX6;K3W4T3;Q9Z1G4-3;Q9Z1G4-2;Q3TXT5;Q9Z1G4;Q3TY98	Atp6v0a1	ENSMUSG00000019302	ATP6V0A1
P08249	Mdh2	ENSMUSG00000019179	MDH2
Q3UCY7;Q3TWN7;Q571E2;Q9R1Q9;Q3TT23;Q3THZ3;Q3UWN7;Q3TKX1	Atp6ap1	ENSMUSG00000019087	ATP6AP1
Q8BXJ6;Q8BGV0;D3YV21	Nars2	ENSMUSG00000018995	NARS2
Q9JLI8	Sart3	ENSMUSG00000018974	SART3
P68510	Ywhah	ENSMUSG00000018965	YWHAH
Q9D0I9;Q3TVC5;Q3UAZ3	Rars	ENSMUSG00000018848	RARS1
D3Z041;P41216	Acsl1	ENSMUSG00000018796	ACSL1
Q6P5B5;Q9WVR4	Fxr2	ENSMUSG00000018765	FXR2
E9PVP3;Q5F2B1;Q8C9V6;Q8R0J2;F6XX36;Q9R0Q9	Mpdu1	ENSMUSG00000018761	MPDU1
Q9JHH9;Q9CTG7;F2Z4A2	Copz2	ENSMUSG00000018672	COPZ2
Q3U506;Q3TLJ5;Q99LM2;Q3TSS9	Cdk5rap3	ENSMUSG00000018669	CDK5RAP3
P83917;Q7TPM0;Q9CYJ8	Cbx1	ENSMUSG00000018666	CBX1
Q3TWY6;Q9Z160;Q3TR89;Q3TAY0;Q3U7X8;Q810S7;Q3TYM3	Cog1	ENSMUSG00000018661	COG1
Q91XF0	Pnpo	ENSMUSG00000018659	PNPO
P50544;B1AR28;Q3UJR6	Acadvl	ENSMUSG00000018574	ACADVL
A2A5Y6;P10637;P10637-6	Mapt	ENSMUSG00000018411	MAPT
A2A5N2;Q9CQV8;A2A5N1	Ywhab	ENSMUSG00000018326	YWHAB
Supplemental file 1 continued
Protein ID	Gene name	Gene ID or gene number	Human orthologue
Q3USC7;Q8VE33;A2A5H8	Gdap1l1	ENSMUSG00000017943	GDAP1L1
Q3UQB4;A2BFB1;Q8K0H8;A2BFB0;O08609-3;O08609;A2BFB2;O08609-2	Mlx	ENSMUSG00000017801	MLX
E9PUE7;Q5SSL4;Q5SSL4-2;Q5SSL4-4;Q5SSL4-3	Abr	ENSMUSG00000017631	ABR
H3BIW0;G3X8T2;Q0P678	Zc3h18	ENSMUSG00000017478	ZC3H18
B2RX66;Q5F2E8;Q3UUG1	Taok1	ENSMUSG00000017291	TAOK1
Q2M4I9;A2A4A6;Q62077;Q3UZ68	Plcg1	ENSMUSG00000016933	PLCG1
Q3UJ84;Q3U417;Q8C8U0;Q8C8U0-3;Q8C8U0-2	Ppfibp1	ENSMUSG00000016487	PPFIBP1
Q9D8S9	Bola1	ENSMUSG00000015943	BOLA1
Q9QZQ8	Macroh2a1	ENSMUSG00000015937	MACROH2A1
V9GXE6;I6L9E0;Q3U3J6;A2ALA6;P09925	Surf1	ENSMUSG00000015790	SURF1
Q3THX4;P97390	Vps45	ENSMUSG00000015747	VPS45
Q8BIW1	Prune1	ENSMUSG00000015711	PRUNE1
Q4FJQ8;Q3UAX2;Q8C562;Q3UC81;Q3UB98;Q3UB54;Q3U841;Q3U784;Q3U5U0;P11152;Q3UCZ2;Q3UCD4;Q3UC44;Q3UBE9;Q3U715;Q3UCH4;Q3U6S8	Lpl	ENSMUSG00000015568	LPL
P50396	Gdi1	ENSMUSG00000015291	GDI1
Q9CR70;J3JS94	Lage3	ENSMUSG00000015289	LAGE3
A1BN54;Q7TPR4	Actn1	ENSMUSG00000015143	ACTN1
Q571E4;Q8CC47	Galns	ENSMUSG00000015027	GALNS
Q3URE1	Acsf3	ENSMUSG00000015016	ACSF3
Q545Q2;Q64310;Q3U7E6;E0CXD9;F7CH13	Surf4	ENSMUSG00000014867	SURF4
Q505D1	Ankrd28	ENSMUSG00000014496	ANKRD28
B7ZNX2;P53995;A2ATQ5;Q3UE43;Q3TP10	Anapc1	ENSMUSG00000014355	ANAPC1
Q3UE37	Ube2z	ENSMUSG00000014349	UBE2Z
Q9D5T0;Q9D9C1	Atad1	ENSMUSG00000013662	ATAD1
B2RQC6;E9QAI5;G3UWN2;B2RQC6-2;Q6P9L1	Cad	ENSMUSG00000013629	CAD
Q91WD5;D3YXT0;F6RJ83	Ndufs2	ENSMUSG00000013593	NDUFS2
Q8C4Y3;Q69ZP4	Nelfb	ENSMUSG00000013465	NELFB
Q3U7Z6;Q9DBJ1;Q6NWV5	Pgam1	ENSMUSG00000011752	PGAM1
Q8CH02	Sugp1	ENSMUSG00000011306	SUGP1
D3Z5M2;Q99LF8	Pabpc4	ENSMUSG00000011257	PABPC4
Q80WQ2;Q8CCX6;Q8C907	Vac14	ENSMUSG00000010936	VAC14
Q8BKZ9	Pdhx	ENSMUSG00000010914	PDHX
Q9ER72;Q3UXN3	Cars	ENSMUSG00000010755	CARS1
P54731	Faf1	ENSMUSG00000010517	FAF1
Q9CW46	Raver1	ENSMUSG00000010205	RAVER1
Q61686	Cbx5	ENSMUSG00000009575	CBX5
Q8BFY9-2;Q8BFY9;Q3TKD0	Tnpo1	ENSMUSG00000009470	TNPO1
Q64332	Syn2	ENSMUSG00000009394	SYN2
Q5SVG5;Q5SVG4;O35643;Q8CC13;Q3TVN4;Q3U1K9	Ap1b1	ENSMUSG00000009090	AP1B1
Q561N5;F6YVP7;P62270;S4R1N6;Q3TW65	Rps18	ENSMUSG00000008668	RPS18
Q3TMH2	Scrn3	ENSMUSG00000008226	SCRN3
Q564F4;Q3TII0;P80315;Q3UJZ8;G5E839	Cct4	ENSMUSG00000007739	CCT4
B2RRS4;E9PWV7;Q923K4;D6RDC6;Q923K4-2	Gtpbp3	ENSMUSG00000007610	GTPBP3
Q3UKQ5;Q3UF03;P24668	M6pr	ENSMUSG00000007458	M6PR
Q3U9X2;Q9ES84;O35901;O35900;Q9EP83	Lsm2	ENSMUSG00000007050	LSM2
Q542F1;Q9Z1Q5;Q3TIP8	Clic1	ENSMUSG00000007041	CLIC1
Q99LD8;O08972	Ddah2	ENSMUSG00000007039	DDAH2
Q3UL64;O35657	Neu1	ENSMUSG00000007038	NEU1
Q790I0;Q9Z1Q9;Q7TPT7;Q3U3D3;G3UY93;Q3TII4	Vars	ENSMUSG00000007029	VARS1
E9Q9M5;J3KMM1;Q3UJD6-2;Q3UJD6	Usp19	ENSMUSG00000006676	USP19
P08030	Aprt	ENSMUSG00000006589	APRT
Q9CVB6;Q3UA52;Q4FZG5;D3YXG6	Arpc2	ENSMUSG00000006304	ARPC2
P62814	Atp6v1b2	ENSMUSG00000006273	ATP6V1B2
Q922Z3;Q3UPJ8;Q3TK29;Q9CQN1;Q922R9;Q3TSG8	Trap1	ENSMUSG00000005981	TRAP1
Supplemental file 1 continued
Protein ID	Gene name	Gene ID or gene number	Human orthologue
P99026	Psmb4	ENSMUSG00000005779	PSMB4
Q3U8E7;P18155	Mthfd2	ENSMUSG00000005667	MTHFD2
M4TKR7;P15208	Insr	ENSMUSG00000005534	INSR
P37040;Q05DV1	Por	ENSMUSG00000005514	POR
Q9DCT2	Ndufs3	ENSMUSG00000005510	NDUFS3
P28659-4;P28659-2;P28659-3;P28659	Celf1	ENSMUSG00000005506	CELF1
Q9R099;Q9CY49	Tbl2	ENSMUSG00000005374	TBL2
Q99MZ3;Q99MZ3-4;Q99MZ3-3;H9U1Q1;Q99MZ3-5;Q99MZ3-2	Mlxipl	ENSMUSG00000005373	MLXIPL
Q8C2D2;P70362;Q9CWQ7;Q9CZJ3	Ufd1	ENSMUSG00000005262	UFD1
Q9Z186	G6pc2	ENSMUSG00000005232	G6PC2
O08847;P08775	Polr2a	ENSMUSG00000005198	POLR2A
Q61171;Q5M9N9;D3Z4A4	Prdx2	ENSMUSG00000005161	PRDX2
O88569;O88569-2;O88569-3;B7ZP22	Hnrnpa2b1	ENSMUSG00000004980	HNRNPA2B1
Q9R0N5	Syt5	ENSMUSG00000004961	SYT5
Q3U9G9	Lbr	ENSMUSG00000004880	LBR
Q8R1V4;Q5SVW9	Tmed4	ENSMUSG00000004394	TMED4
Q6ZQ84;Q9JLV5;E9Q4T8	Cul3	ENSMUSG00000004364	CUL3
Q91V01	Lpcat3	ENSMUSG00000004270	LPCAT3
Q542P8;O35130	Emg1	ENSMUSG00000004268	EMG1
Q545V3;Q3UJ20;P17183;D3Z6E4;Q922A0	Eno2	ENSMUSG00000004267	ENO2
Q3V235;O35129;F6QPR1	Phb2	ENSMUSG00000004264	PHB2
Q544R7;Q3U6W4;O70252;D3YX62	Hmox2	ENSMUSG00000004070	HMOX2
Q3TY95;Q60823;F8WHG5;Q8CE74;D3YXM7;D3Z3N2	Akt2	ENSMUSG00000004056	AKT2
Q3ULI4;Q3U5Q4;P42227;Q6GU23;P42227-2;B7ZC18;Q3U6S9	Stat3	ENSMUSG00000004040	STAT3
P62918;Q3UJS0;Q3THC7;Q9Z237	Rpl8	ENSMUSG00000003970	RPL8
Q542Y0;Q64669;Q99KL8	Nqo1	ENSMUSG00000003849	NQO1
B2MWM9;P14211;Q3UWP8	Calr	ENSMUSG00000003814	CALR
Q60759;Q8BVD4	Gcdh	ENSMUSG00000003809	GCDH
Q8C0C7;E9PWY9;Q8BJG2;Q8BXN0;Q4FJQ2	Farsa	ENSMUSG00000003808	FARSA
Q9Z2X8;Q05DM3;Q3UWI4	Keap1	ENSMUSG00000003308	KEAP1
Q8CHW4	Eif2b5	ENSMUSG00000003235	EIF2B5
Q3TRJ7;Q62419;Q3U3C4	Sh3gl1	ENSMUSG00000003200	SH3GL1
P46414;Q4FJM2	Cdkn1b	ENSMUSG00000003031	CDKN1B
Q6GTX3;Q4FK40;Q3UBS0;Q3TXU4;P08226;Q3TX45;Q3UEE7;G3UWN5	Apoe	ENSMUSG00000002985	APOE
Q8VBZ3	Clptm1	ENSMUSG00000002981	CLPTM1
Q99K86;Q9R069;Q8BGB4	Bcam	ENSMUSG00000002980	BCAM
Q3UMU9;Q3UMU9-3;Q3UMU9-4;Q3UMU9-2	Hdgfl2	ENSMUSG00000002833	HDGFL2
Q9CQW1	Ykt6	ENSMUSG00000002741	YKT6
Q9D0K8;Q5RL57;Q3TLG2;Q9R0L7	Akap8l	ENSMUSG00000002625	AKAP8L
P28028	Braf	ENSMUSG00000002413	BRAF
Q9CQ56;Q5I940;Q05CJ0;Q9CQ56-2	Use1	ENSMUSG00000002395	USE1
Q8K4Z5;Q3TVM1	Sf3a1	ENSMUSG00000002129	SF3A1
P24638;Q3UZN1;Q3U4F3	Acp2	ENSMUSG00000002103	ACP2
Q3U8Y7;Q3TKG4;O88685;Q3TKC2;A2AGN7;B7ZCF1;A0A087WPH7;Q3UD94	Psmc3	ENSMUSG00000002102	PSMC3
Q3U9U5;Q61335	Bcap31	ENSMUSG00000002015	BCAP31
Q3TKM5;Q3TGZ3;P70404;Q684I8	Idh3g	ENSMUSG00000002010	IDH3G
O08579;Q3THM8;I7HJS1;B7FAU5	Emd	ENSMUSG00000001964	EMD
Q99LL5;E9QAL6;Q9CTC0;Q9CSK2;Q8BW04	Pwp1	ENSMUSG00000001785	PWP1
Q9DBL7	Coasy	ENSMUSG00000001755	COASY
O88325;O54752	Naglu	ENSMUSG00000001751	NAGLU
P99024	Tubb5	ENSMUSG00000001525	TUBB
Q11011;E9Q039;F6QYF8;E9Q6F4	Npepps	ENSMUSG00000001441	NPEPPS
Q3TFE8;Q7TSZ6;P70168;Q3UHW8	Kpnb1	ENSMUSG00000001440	KPNB1
Supplemental file 1 continued
Protein ID	Gene name	Gene ID or gene number	Human orthologue
Q3TW51;Q78PY7;Q3UZI3;Q3TRW3	Snd1	ENSMUSG00000001424	SND1
E9QKT0;Q63943-2;Q921S6;Q63943;Q3URR2;E9Q5E0	Mef2d	ENSMUSG00000001419	MEF2D
Q3U4U6;P80318;E9Q133;Q3U0I3;F6Q609	Cct3	ENSMUSG00000001416	CCT3
D3Z4P2;P59481	Lman2l	ENSMUSG00000001143	LMAN2L
Q9D689;Q6P1F5;Q6ZQ77;Q9JKY5;Q80UP1	Hip1r	ENSMUSG00000000915	HIP1R
P47963;Q5RKP3	Rpl13	ENSMUSG00000000740	RPL13
D3YZN4;Q7TNG0;D3Z1Z1;B2RQY8;Q3ULF4;D3YXB7;F6W695	Spg7	ENSMUSG00000000738	SPG7
B2RPS1;Q0PD56;P61021;Q8C458	Rab5b	ENSMUSG00000000711	RAB5B
Q545N7;P30275;A2ARP5	Ckmt1	ENSMUSG00000000308	CKMT1B
D3Z596;D3YWU5;D3Z595	Ins2	ENSMUSG00000000215	INS
P24529;Q3UTB3;E9Q9G5	Th	ENSMUSG00000000214	TH
