# Supplementary material for: Novel regulators of islet function identified from genetic variation in mouse islet Ca2+ oscillations
Source: eLife. 2023 Oct 3;12:RP88189. doi: 10.7554/eLife.88189 (PMC10547476; doi:10.7554/eLife.88189)
Supplement: Supplementary file 3. — The Enrichr tool (Chen et al., 2013; Kuleshov et al., 2016) queries multiple databases for information regarding gene lists and queries can be stored for access later using hyperlinks. This Excel file contains five tabs. The ‘Key’ tab indicates the contents of the file. The ‘Uniprot_IDs_correlated’ and ‘Uniprot_IDs_anticorrelated’ tabs each, respectively, contain in their columns lists of the Uniprot IDs for peptides correlated (coefficient >0.5) or anticorrelated (coefficient <−0.5) to specific Ca2+ parameters listed in the row labeled ‘Traits’. These Uniprot IDs were queried to determine the gene names. The ‘Enrichr_correlated’ and ‘Enrichr_anticorrelated’ tabs each, respectively, contain these corresponding gene names for those proteins correlated (coefficient >0.5) or anticorrelated (coefficient <−0.5) to specific Ca2+ parameters listed in the row labeled ‘Traits’. In the row ‘Enrichr Link’ contains the Enrichr query hyperlinks for each protein list. For example, the Enrichr_correlated column B has the link https://maayanlab.cloud/Enrichr/enrich?dataset=affcd1912271cd603ec6e26304ac789e which is the Enrichr database search for the proteins listed in that column that correlate with the 1st frequency component in 8G. This table is available via the Zenodo repository (DOI 10.5281/zenodo.7776230). [file elife-88189-supp3.xlsx]

## Sheet: Uniprot_IDs_correlated
Trait	8G 1st freq.	8G 2nd freq.	8G 1st freq. ampl.	8G 2nd freq. ampl.	8G/QLA 1st freq.	8G/QLA 2nd freq.	8G/QLA 1st freq. ampl.	8G/QLA 2nd freq. ampl.	8G/QLA/GIP 1st freq.	8G/QLA/GIP 2nd freq.	8G/QLA/GIP 1st freq. ampl.	8G/QLA/GIP 2nd freq. ampl.	8G Baseline	8G Peak	8G PF	8G AD	8G PD	8G SP	8G Avg Ca2+	8G Avg Ca2+ change from basal	8G Detrended avg Ca2+	8G Detrended avg Ca2+ change from basal	8G/QLA Baseline	8G/QLA Peak	8G/QLA PF	8G/QLA AD	8G/QLA PD	8G/QLA SP	8G/QLA Avg Ca2+	8G/QLA Avg Ca2+ change from basal	8G/QLA Detrended avg Ca2+	8G/QLA Detrended avg Ca2+ change from basal	8G/QLA/GIP Baseline	8G/QLA/GIP Peak	8G/QLA/GIP PF	8G/QLA/GIP AD	8G/QLA/GIP PD	8G/QLA/GIP SP	8G/QLA/GIP Avg Ca2+	8G/QLA/GIP Avg Ca2+ change from basal	8G/QLA/GIP Detrended avg Ca2+	8G/QLA/GIP Detrended avg Ca2+ change from basal	Basal Ca2+ Avg Ca2+
Protein IDs	Q9DCZ1;F6VY18	Q99LU0;Q3TJ28	P70302	Q8BFW6	Q8CBE6;Q8BPJ7;Q544G5;Q62165;D9IFT4	P18608;D3Z607;Q8CEW1	A0A087WRI8;G5E8E3;Q8R3Y5-2;Q8R3Y5	E9QMV2;C6EQJ5;Q4KML4	Q3UYN1;Q544R1;Q9Z2Y8;Q6P8V7	Q9Z2E1	Q52L50;Q99JI6	Q9D927	Q564G0	Q3TV22;P97792-2;P97792	Q810A3	Q5F2E7;Q5F2E7-2	Q9CQ45	Q3UU20;Q8R1F6-2;Q8R1F6	Q99J83	E9Q7N5;Q8R2Q4-3;Q8R2Q4-2;Q8R2Q4;Q3TML3;Q3TSU6;Q8C1C2	Q9D6S7	A9E3L2;Q9Z2I2;Q80YE1;Q810R7	D3YXJ5	A2AW05;Q05DR5;Q08943;Q08943-2	Q62417-2;Q62417;Q62417-7;Q62417-5;Q62417-6;Q62417-4;Q62417-3	Q9JJE1;Q3U3F4;Q3TMJ8;P31938;Q3UK05;Q3TMW4	Q8BTU4;Q564E6;Q3TG93;P32067;Q9CYB9	Q8R0F3;E9Q265;E9Q0Z7	Q0P6I6	Q8JZZ5;P53811	Q9JJH1	Q8R395	Q9CZ04;Q9CZ04-2;D3Z440;D3YVI6	Q9CQ10	Q3UNF2;P97470	Q544K9;Q3TVV7;P13439	Q6A0A2;Q6A0A2-2;Q6A0A2-3	Q99JT9;F7ARY2	Q80X90	B1AU74;Q9CWP6-2;Q9CWP6-3;Q9CWP6;Q3U0U1;Q9CWP6-4	Q9JM62;Q9JM62-2	D6RI47;D3YWI4;E9Q1I6;F8WHT5;G3UVW1;P19258	Q499D4;Q3TM67;Q9ESX5;Q3TI79;B7ZCL7;F6YUI5
	Q8BP71-5;Q8BP71;Q8BP71-6;Q9JJ43-5;Q9JJ43-2;Q8BP71-7;Q9JJ43-4;Q8BP71-8;Q8BP71-3;Q9JJ43-6;Q9JJ43;Q9JJ43-3;Q8BP71-2	Q60I30;Q9D892;Q3U589	Q3T9Z2;Q91Z53	Q9D020-1;Q9D020	Q8R4R6;A2ATJ2	Q8BHC2;Q9CX00	Q91UZ1;V9GXQ9;A2AT91;Q5FWA6;Q8BXH1	Q4FK38;Q3UDJ2;Q8R0X7;Q69ZN1;D6REF7	Q9DCC4	Q3U781;Q9D6W4;P84104-2;P84104;A2A4X6	Q80YA7	Q7TN29;Q7TN29-2	Q9CXS4	D3Z4T6;A0A4W9;Q80Z24	Q8BTW2;Q3U8X1;Q9DCH4;Q6IRT4;Q3UVY8	Q7TQE2;Q8CBM0;Q3TCR9;Q62523;Q8CD55	B0QZX9;Q8BHC4	Q8K2T8	P99024	Q80U35-2;Q80U35	Q5EEX1;P01326;E0CXX7	I6L970;Q3TBX5;Q3U3K9;P70295;Q3TAZ9	Q544B1;Q3UJW1;Q3U9J7;Q3TVM2;P47738;Q3U6I3	Q9ME04;Q7JCY6;P03911;W0TGY1;F1JVR2;A9UIX0;Q3UQ59;A0A075DCI1	P56480	Q8BYM8;G3X975	Q9QZH6;J3KMM6	Q3UZT7;Q02248;E9Q6A9;Q80VE7	B2RWX4;Q8BZ36-2;Q8BZ36	Q3UNZ8;Q3UNZ8-2	A2AW05;Q05DR5;Q08943;Q08943-2	B2RX64;Q571E5;B7ZWH8	B2RS41;Q8BWF0	O08847;P08775	Q3TQY2;Q8CBY8-2;Q8CBY8	P28659-4;P28659-2;P28659-3;P28659	P20108;Q8K4K8	Q3U487	Q8JZZ5;P53811	Q9ERS2	Q5RKP0;Q499X4;Q3TXD3;Q62465;Q3U331	D3Z1F9;Q8C0M0-2;Q8C0M0;Q8C0M0-3	A2AF58;Q80T23;Q80T23-2
	O70569;P62264;Q3UJS5;D3YVF4;D3Z7I1	Q3UHW2;Q3TT11;P51660	Q3TDA1;Q8BX94;Q571D2	Q6PGG8;Q80VL1	Q3UC51;O54734;Q3UG68	Q91VZ6;D3YVX4	Q6P6M7;Q3U597	Q3TB24;Q9QYI5;Q9QYI5-2	Q68EF0	D3Z6P0-2;D3Z6P0	Q9DB29	Q7TMK6;Q3UWV9;Q3TKK8	Q925E7;F6RV17	Q149D1;Q8BH55	Q8BH43;Q3T9Z7;Q80UQ8	P97855;Q571F9;Q3UR88	A2API8;F7AA26;O54931-2;O54931;Q99L95;Q69ZV5;O54931-5;O54931-4;O54931-3;Q8C9L6	A8C1T7;Q91XD7	Q9CQ10	Q102J0;Q8R242;Q8R242-2	P97467;F8VQA4;E9Q704;Q3V1A8	Q3U6F6;P26638;Q8C483;Q3U8N1;A2AFS0	Q3URS9-2;Q3URS9	Q11011;E9Q039;F6QYF8;E9Q6F4	Q63810-2;Q63810	P80316	P50518	Q8C4C9;Q9QYI4;D6RHR9	Q3UL64;O35657	Q8CIH9;Q3TUW2;Q3UGA8;Q3TKC5;Q3UGU3	Q8VDG5;Q8VDG5-2	B2RRX2;P63328-2;P63328;Q4V9X0	Q8R3N6;Q3UTN0	Q3TLS3	Q91WU5	P57722;P57722-2;E9Q7D8;Q8CFQ6	Q9CQY2;D3YZS0	P15920	Q8CIH9;Q3TUW2;Q3UGA8;Q3TKC5;Q3UGU3	Q924L1-3;Q924L1-2;Q924L1	D3Z6J0;Q6SKR2;Q6PRU9;Q4KMV5;E9PXT7	Q8R121;Q8R121-2	Q6A028
	Q810A3	Q8VDK1-2;Q8VDK1;D3YY53	Q543B9;Q9QUR6;Q3TCS0;Q8C6A3;Q3TQ97	O08847;P08775	A1L367;A1L366;Q61550;Q3UTE4;Q3TG35;Q6ZQJ6	Q3U8Y7;Q3TKG4;O88685;Q3TKC2;A2AGN7;B7ZCF1;A0A087WPH7;Q3UD94	Q9CPX6	Q8R1E1;E9QL80;Q6A0A4;Q3UZK0;Q91YX5;D3YVK0	O88968	Q3TF41;Q8BSH9;P28656;E9PW66	Q6P5D8	U5LK19;E9Q5B0;Q80VC9-2;Q80VC9;U5LGS1;U5LHW1;U5LK70;U5LK15;U5LHT8;U5LGR7;U5LGT0;U5LHW9	Q3TRJ7;Q62419;Q3U3C4	Q8R1J9;H3BK73;P0C7W3;Q8BT54	Q9CRC6	Q58E29;Q0VEW4;Q9R1Q7	Q58E29;Q0VEW4;Q9R1Q7	F6RJV6;Q9JJK2	Q9EQT6	P56376;Q4VAF0;E9QJT5	Q91YP0	Q102J0;Q8R242;Q8R242-2	Q9DB15	Q3UWH3;Q3TL56;Q80X41-2;Q80X41-5;Q80X41-3;Q80X41	Q3UPL0;Q3UPL0-2	Q9QZH6;J3KMM6	A2AD03;Q3UR39;Q9QXG2;Q8CBI2	Q99KG5-3;Q99KG5-2;Q99KG5;D3YYU9	Q6XPS7;Q9DBC9	Q60902-4;Q60902-2;Q60902;Q60902-3	D3YWK1;Q80W47	A2AW05;Q05DR5;Q08943;Q08943-2	Q8VCF1;Q8VCF1-3	Q8BM72	O54962	Q6A0A2;Q6A0A2-2;Q6A0A2-3	E9QLB2;Q3UFF7	P70245;A2AC29	P70227	Q8K1J6;Q8K1J6-2	Q3TDA7;Q9WVE8;Q3UP40	Q3U4P3;Q8K1M6-4	A2AQ53;O88840;Q61554;Q60784
	Q9DBS5	Q8R016	Q9EPK6	Q3U896;Q9Z2D0	Q9D823	P61922;Q3V1S0;P61922-2	P11881-8;P11881-7;P11881-6;P11881-5;P11881-4;P11881-2;P11881-3;P11881	Q64337-2	Q8C1L7;Q9CQR2	Q7TNV0;Q3U4W4;E9Q8Y1;D3YVJ6;Q9CVL7	Q8BRM2;A0A087WQS3	Q3UGS9;Q3URM1;Q3U3U6;Q8CCN6;Q60649;Q3TXD4;E9PY58	Q8CHF1;P28738;Q3TY51	Q3ULN8;Q6PD03	D3Z3A0;Q9DCL8;Q8BVM6;Q9CT86	A0A067XG53;B9EJ23;B7ZP42;O70589-3;O70589-4;O70589-5;O70589;O70589-2;F6Y9I5;Q91VJ0;F6ZQR2;Q3TNZ0;B1AUH5;F7CD87	Z4YJR1;Q3U3R4-2;Q3U3R4;Q3U3R4-3	Q9EQS3;Q3V1X1;Q8C5M8;A2A7K5	Q8VCF1;Q8VCF1-3	Q3U4K3;Q3U422	Q3TD41;Q3UGF2;Q1AJD0;Q5SVQ0-4;Q5SVQ0-2;Q5SVQ0-3;Q5SVQ0	Q61001;Q6ZQA1	Q99L27	Q52L66;Q91W67	Q8BGT8;F7D3N3;Q8BGT8-2;F6U6Z2	F8WHT3;Q7TPM1;F7AYW2;A2AN33	P80316	Q8BP01	B1AU74;Q9CWP6-2;Q9CWP6-3;Q9CWP6;Q3U0U1;Q9CWP6-4	B7ZMT9;B9EHC3;Q9JME2	Q543Q4;P35276;Q8BP17	A2ATI9;Q99JX3;Q3TG07;Q3TX06;Q3TIK1;A2ATI8;A2ATI6;Q99JX3-2;Q3V458	Q4FJP2;Q3UJ82;O35309	Q9DAU1;Q9DAU1-2	Q3UHL7;E9QN70;B9EKB0;P02469;Q9CRX6;Q8K271	P20108;Q8K4K8	P28659-4;P28659-2;P28659-3;P28659	Q99N92	A2AJH3;Q3THR4;O70311;Q8CFK1	Q8VCF1;Q8VCF1-3	Q8VEK0;D3YVV1	Q3UDY1;P45376;Q5U415;Q3TCL2;D3YVJ7;Q3ULP0	E9Q8T1
	Q4FZH3;E9Q317;O55128;D3YY73;D3Z2N9	Q545R3;Q3TSR4;B7ZWC0;Q62433;Q3TD08	Q921N0	B2RY27;Q8BYC6;Q3V3K3	Q99KP6;Q99KP6-2;Q4ADG5;Q99KP6-3	D3Z600;O09012-2;O09012	Q3TWI9	Q545Q2;Q64310;Q3U7E6;E0CXD9;F7CH13	Q03265;D3Z6F5	Q91V55;P97461;D3YYM6	Q3TJQ2;Q3U866;Q3U399;Q91ZN5-2;Q91ZN5	Q3TJQ2;Q3U866;Q3U399;Q91ZN5-2;Q91ZN5	Q8K2C6;Q5M8R0	Q9DB73;G3UZG6;Q9DB73-2	Q91VH6;Q3TWT2	Q8R016;E9PY26;E9Q6V3;E9PZH4;E9QA53	E9QMU3;D3YWN7;O88735-2	Q3URC9;Q8R0I0;C7ECU2;Q8R0I0-2	O88325;O54752	Q8BTZ7	Q3U6F6;P26638;Q8C483;Q3U8N1;A2AFS0	Q9EQT6	Q922A2;Q3TJ49;Q07076;Q3UYL7;Q8BP75;Q8CCV9	Q102J0;Q8R242;Q8R242-2	Q8R1Q3	Q91V38;Q3UAD6;P08113;Q3UBU0;Q3TUD6;Q8CCY5;F7C312	Q61074	P70227	Q9D4H1;Q8K2J3	Q8VD31	Q8VCF1;Q8VCF1-3	E9Q7N5;Q8R2Q4-3;Q8R2Q4-2;Q8R2Q4;Q3TML3;Q3TSU6;Q8C1C2	Q5SSZ5;Q5SSZ5-2	A2ASR7;A2ASR8;Q3ULL2;Q2LC58;P25916	Q61171;Q5M9N9;D3Z4A4	Q99MR8	Q6WVG3;Q69ZA6	Q3UK39;Q3UJN1;P97310	Q9D4H1;Q8K2J3	Q8VD31	Q3TLS3	Q5RKP0;Q499X4;Q3TXD3;Q62465;Q3U331	P97364
	Q3TLX1;Q99KQ4	Q3U931;Q542W3;Q3U541;P97379-2;P97379;Q3U6B1	Q64471;Q9DCY6;D3Z3X5	Q64471;Q9DCY6;D3Z3X5	P62196;Q99KR1;Q8K1K2	Q3V0T8;Q9WTN0;Q9CZZ6	Q3UJU9	Q9CPX6	P60335	P28661-5;P28661-4;P28661-3;P28661-2;P28661	E0CZ01;Q3UR50;Q3UR50-2	Q8R409;Q8VDF7	D3Z1F6;B9EK90;Q8VDU5	F8VQL9;E9PY55;E9Q701;Q9WU42;E9Q9V3;Q9WU42-2;F6Z4B2;D3Z2J5	O08749;Q3TIE8	Q5BLK2;P60867	Q8K4R4-2;X1WI19;Q8BTD8;Q8K4R4-3;Q8K4R4;Q8K4R4-4	P63101	P70302	Q9JM62;Q9JM62-2	Q3TMB8;P54822;E9Q242;E9Q3T7	Q99K41;Q3U254;Q3USG5;Q3UUU0	D3YZR1;Q9JHE7;D3Z6S3;D3YYU6	Q8C140;Q9QXX4;Q91YK1	Q8C2T9;Q9Z1M8;Q3TJY5;Q8CDT0;Q8C7D0	A0MNP4;Q9ERF3;Q8BVQ0;D6RDC7	Q91V38;Q3UAD6;P08113;Q3UBU0;Q3TUD6;Q8CCY5;F7C312	Q5FWB6;E9Q070;D3YVM5	P47867	E9Q1Q9;P97328;Q9CPP1;D3YVB6	Q91V76	Q9JM62;Q9JM62-2	E9Q1S3;Q01405;Q8C1E4	Q9JJU8;Q3U9A8	P38647	Q9Z2E1	Q9JKB3-2;Q68G78;Q9JKB3;Q61478;Q64369;Q8BPG0	Q99LS5;E9Q137;Q3TXY2;Q9D7D9	P70704-2;A1L332;F6WYQ5;P70704-3;Q5DTG0;P70704;Q8CA15;Q52KQ7	D3Z1F9;Q8C0M0-2;Q8C0M0;Q8C0M0-3	Q8R121;Q8R121-2	E9Q9J4;Q6ZQB6-3;Q6ZQB6;Q6ZQB6-2;Q80V47	B2RT97;Q9WVJ2;E9Q5I9
	Q6QWF9	Q9DBS5	E9Q1S3;Q01405;Q8C1E4	B7ZNX2;P53995;A2ATQ5;Q3UE43;Q3TP10	Q5SNZ0-3;Q5SNZ0-2;Q5SNZ0	Q4FK11;Q3UM20;Q3TF40;Q99K48;Q3TTV7;Q3TFC2	O70152;A2BDX2	Q80XN0;D3Z2Y8	Q3UKQ3;Q3U6Q1;Q923D5;Q3TXH8	Q3UFJ3;P35486	Q9DBC7;Q3TYK4;Q8C3Z4;Q3UBA7;A2AI69;F8S0Y0	Q791Q5;Q570Z9;Q9JIL0;P70389	Q9Z2X2;A2AG83	Q9DBC7;Q3TYK4;Q8C3Z4;Q3UBA7;A2AI69;F8S0Y0	Q6ZWV7;G3UWD7	Q9CZX9	Q3UT02;E9Q066;G3X9Q6;Q8BWW4	Q3V100;Q924M7	Q4VA93;P20444	A9E3L2;Q9Z2I2;Q80YE1;Q810R7	Q3UYC0;Q3UYC0-2	Q3UYC0;Q3UYC0-2	Q4VAE8;Q9CQC7;Q9DBH2	Q545Q2;Q64310;Q3U7E6;E0CXD9;F7CH13	Q52KC1;P10630;Q8BTU6;E9Q561	Q9D187;F8WHV1	Q541E2;Q3TWM2;P51855;Q8R436	Q8BTX6;Q9CZU3;Q91YT4;Q6ZQK1;Q8BVI7	P36916;A2VDH5;Q52KE3;P36916-2	F6TBV1;F6WHL0;A2ADH1;Q9CQY5-2;Q9CQY5-3;Q9CQY5	Q3U2Z6;Q3TDY6;O89023	Q91YT8	D3YWD8;Q2VWQ2	Q80X95	Q60960	F8WHT3;Q7TPM1;F7AYW2;A2AN33	Q9CZ30;Q3TW21;Q3TJF2;B1AYJ9;Q9CZ30-2	Q99JX4;A2A702	P36916;A2VDH5;Q52KE3;P36916-2	Q8JZZ5;P53811	Q8JZZ5;P53811	Q8VEK0;D3YVV1	F6TLV3;Q8BX90
	W6PPR4;W6PPA1;S4R2K9;S4R1S2;G5E8K5-2	Q3TFP0;Q3UDH7;Q3UA07;Q3UYX6;Q9R0U0-3;Q9R0U0-2;Q9R0U0	Q3U896;Q9Z2D0	Q544U7;Q9ERI2	B9EKE9;Q3TQX5;Q62167;B7ZWF1;B9EIA2;P16381	Q9CWU9	S4R1W1	Q7TQ39	P24529;Q3UTB3;E9Q9G5	Q3TX38;Q3TTN3;Q60931;J3QMG3	Q8R3G9	Q8QZW3	A2AFF6;O35638	Q0PD65;P53994;Q8BXY4;Q6PDZ3	Q4V9X9;Q5M9M5;P62751;Q91YK6	Q4FZE6;P62082;F6SVV1	E9PUC4;Q6NSW3-2;Q6NSW3;Q6NSW3-3;Q6NSW3-4	Q6PGF7	A2VCP7;A2AU35;Q8BHL8	Q0P6I6	Q99K41;Q3U254;Q3USG5;Q3UUU0	A2AQ17;Q9CWX2	B2RS41;Q8BWF0	Q548L0;Q3UJ69;Q61624;Q91XQ8;Q8CB43	Q6ZWZ4;Q5M9L1;P47964	Q3TQY2;Q8CBY8-2;Q8CBY8	Q9D187;F8WHV1	Q99JI4;Q8C1T2	Q8VD75	O08847;P08775	Q8R395	E9Q1Q9;P97328;Q9CPP1;D3YVB6	Q0P6I6	D3Z5I1;Q3UPF5-2;Q3UPF5;G3X9X5;Q8K302	E0CY18;A0A087WPF5;Q91X58	E3SRG7;E3SRG8;E3SRH0;Q811W8;P97471;E3SRG9	Q99MR8	Q3UDZ1;P84096	Q9D020-1;Q9D020	Q9CZ62-2;Q9CZ62;Q8C1I9	Q8C6E0;Q99JR9	Q5SRX1;Q5SRX1-2;Q5SRX1-3;Q5SRX1-4;Q5SXA5;Q5SXA4;Q5SRX1-5	Q61292;Q3USI2
	Q5EBQ0	Q8VDP4	Q7TMC8;Q8C7W3;Q7TSB1;Q8CI18;Q6KAP2	Q80SY5	Q3UGR5;Q3UGR5-2	Q6NXZ0;Q3UDD5	Q6PAC1;P13020-2;Q3UCW8;P13020;Q3U9Q8;Q3TGJ9	Q4QQP1;Q9CZG3	Q8BGH2	Q3V235;O35129;F6QPR1	P42232	Q9DBC7;Q3TYK4;Q8C3Z4;Q3UBA7;A2AI69;F8S0Y0	Q5HZY7;Q9CR51;Q3U7E0	Q64332	Q8BTW3	Q9QZD9;Q3T9Y8;A2AE03;Q8BTM6	Q8VDS8-3;Q8VDS8;Q8VDS8-2;D3YY98	P37804	Q0PD65;P53994;Q8BXY4;Q6PDZ3	D3YWT0;D3YTS1;Q9R0P6;D3Z569;Q6PET3	Q9QWR8	Q5SVL6;Q5SVL6-2	A2AIX1;E9QAT4;Q811L5;Q80U43;F7BPW6	Q3TN26;Q3TP13;Q544D7;Q60714	D3Z1F7;Q9DBN4;D3YXF2;Q9DBN4-3;Q9DBN4-2	E9Q640;Q6NZN0-5;Q6NZN0-3;Q6NZN0-4;Q6NZN0-2;Q6NZN0;E9PYZ7;E9PUF4	Q544K9;Q3TVV7;P13439	Q8JZQ2;Q3UDQ7;Q3U7C0	Q8BRF7;Q8BRF7-3;Q8BRF7-2	Q8R121;Q8R121-2	Q91YT8	D3YXH0;P63054	Q60902-4;Q60902-2;Q60902;Q60902-3	O35459;F7B227	A2A5N2;Q9CQV8;A2A5N1	Q8BH95;F6T930	Q69ZW3-2;Q69ZW3	D6RII3;B9EKL9;Q05BC3-2;Q05BC3;D3Z4J9;Q05BC3-3	Q3UHE1;Q3UHE1-2;Q14DP4	D3YWT0;D3YTS1;Q9R0P6;D3Z569;Q6PET3	Q64521;A2AQR0	Q8JZZ5;P53811	Q91VE6-2;Q91VE6
	O35127	A2AEX8;A2AEX6;P97447;A2AEX7;A2AEY1;A2AEY2;P97447-2	Q99KW9	Q3T9Z2;Q91Z53	A1L0U3;B9EI85;P84228;A1L0V4;P68433;F8WI35	Q8BH43;Q3T9Z7;Q80UQ8	Q64337-2	Q80XR5;P26369;Q505Q1;Q922I0;Q3KQM4	Q5SZA3;P15864	Q3U741;Q501J6;Q3TU25;Q501J6-2	Q8K2I1;D3YWJ4	Q9DB29	Q9D1I6	D3Z1H9;Q7TMS6;Q3U011;Q9JL62;D3Z1H8	Q99LU0;Q3TJ28	Q66JS6	A0A067XG53;B9EJ23;B7ZP42;O70589-3;O70589-4;O70589-5;O70589;O70589-2	Q5NC81;P15532;Q5NC80	Q8BVK3;Q3TW96;Q3TW96-2	Q99L27	Q3TDA7;Q9WVE8;Q3UP40	Q5EEX1;P01326;E0CXX7	Q3TWZ9;Q3TJ95;Q6IRU5-2;Q6IRU5;A2VCP8;F7BHJ0;Q6IRU5-3	Q60520;Q60520-1	P28659-4;P28659-2;P28659-3;P28659	Q61074	E9Q640;Q6NZN0-5;Q6NZN0-3;Q6NZN0-4;Q6NZN0-2;Q6NZN0;E9PYZ7;E9PUF4	Q8C0Y0;Q8C0Y0-3;Q8C0Y0-2	P70302	Q9D8C4	Q9JM62;Q9JM62-2	Q3U2Z6;Q3TDY6;O89023	Q3U9X3;Q91WE2;Q05CB0	Q8QZW3	E0CY91;E0CYW1;E0CY38;E9QJZ1;E0CZB3;Q9EPV8	Q6WVG3;Q69ZA6	P27546-2;P27546;P27546-3;E9PZ43	Q5SVG5;Q5SVG4;O35643;Q8CC13;Q3TVN4;Q3U1K9	D3Z7C0;Q3UKS6;Q9Z2Q5	Q3TDA7;Q9WVE8;Q3UP40	E9Q9J4;Q6ZQB6-3;Q6ZQB6;Q6ZQB6-2;Q80V47	Q3TNH0;Q61029-3;Q61029-2;Q61033-2	Q3UGY8
	Q6PIU9	Q9DCZ1;F6VY18	P15626;D3YX76	Q9EPK6	Q9CXW2	Q99J21;Q99J21-2	Q4FK38;Q3UDJ2;Q8R0X7;Q69ZN1;D6REF7	Q6PAC1;P13020-2;Q3UCW8;P13020;Q3U9Q8;Q3TGJ9	P42208;E9Q3V6;F6WYM0;D3YYB1;D3Z3C0	Q8VIM9	Q80V26	Q54AG5;O55229;Q6NVC1	D3YYW8;Q91V81;Q91V81-2	B1AU74;Q9CWP6-2;Q9CWP6-3;Q9CWP6;Q3U0U1;Q9CWP6-4	Q8VE88-2;Q8VE88	Q3TPU5;O70378;Q8C988;Q3TTC9;M0QWY0;M0QWP2;M0QWI7;M0QWC9;M0QWS0;M0QWE2	P28740-2;E0CZ72;P28740;P28740-1	Q91XE8	D3YU12;Q8K2T1;G5E8S7;Q8K2T1-2	Q9D6S7	Q9CQN7;F7CXS7	P97467;F8VQA4;E9Q704;Q3V1A8	Q9QXY6;Q8R0V6	Q9JIS5	Q80XD3;O54829;Q45FE4;Q45FE5;Q45FE1;Q45FE2;Q45FE3;A0A087WSH2;A0A087WQG6;A0A087WSJ9;A0A087WPW1;F6WDS8;A0A087WNZ9;A0A087WRP8;A0A087WPC4;A0A087WPD1;A0A087WRN0;Q9Z2H2	Q5BLJ7;P62301;Q921R2	Q5BLJ7;P62301;Q921R2	Q9JM62;Q9JM62-2	Q9DB15	Q8VDG5;Q8VDG5-2	Q4FK39;Q3UW00;Q9JL16-2;Q9JL16	Q8VCF1;Q8VCF1-3	Q5QGU0;G3X8R0;Q9CQG4;Q921E4	Q543N6;P58389;Q8C0E1;A2AWE9;A2AWF0	Q3UUF0;Q8C541;O08914;Q8BRM1	Q9JKB3-2;Q68G78;Q9JKB3;Q61478;Q64369;Q8BPG0	Q8BH95;F6T930	Q9D0R2;Q3U630	Q3TMB8;P54822;E9Q242;E9Q3T7	Q5SRX1;Q5SRX1-2;Q5SRX1-3;Q5SRX1-4;Q5SXA5;Q5SXA4;Q5SRX1-5	Q3TNH0;Q61029-3;Q61029-2;Q61033-2	Q543N6;P58389;Q8C0E1;A2AWE9;A2AWF0	Q9DBZ6;Q3U645;P55096;Q3UNS0
	Q8BYK6-3;Q8BYK6;Q7TN20;Q8BYK6-2;Q8BVC6	Q8BP71-5;Q8BP71;Q8BP71-6;Q9JJ43-5;Q9JJ43-2;Q8BP71-7;Q9JJ43-4;Q8BP71-8;Q8BP71-3;Q9JJ43-6;Q9JJ43;Q9JJ43-3;Q8BP71-2	Q7TMK6;Q3UWV9;Q3TKK8	Q9JKY0	Q8C5B4	Q5SZA3;P15864	E9QMV2;C6EQJ5;Q4KML4	Q9JJH1	P28659-4;P28659-2;P28659-3;P28659	Q69ZA1-2;Q69ZA1	Q3UEQ1;D3YTM1;E9Q9A0;D3YUD3;D3YUL8;D3Z230	Q8K1J6;Q8K1J6-2	A2VCP7;A2AU35;Q8BHL8	Q62426	Q9D2U5-2;Q9D2U5	Q8R0H9;Q3TB03	Q8BJT9;Q8BJR2;Q91VV3;Q8BK85	O88630;Q80UU0	Q9CZ04;Q9CZ04-2;D3Z440;D3YVI6	Q3URS9-2;Q3URS9	D3Z7P3-2	Q9CQN7;F7CXS7	D3YWD8;Q2VWQ2	Q63829;Q5U5W6	B2RTM0;P62806	A2AD03;Q3UR39;Q9QXG2;Q8CBI2	Q3TV94;Q52PE3;Q9CY50	O08915;D3YW40	Q3UYC0;Q3UYC0-2	Q3V169;A2N6K9;E9Q046;O35706;L7N265;D3Z452;Q62183;E9Q2X0;Q99206;Q8C5S9;Q80YU2;Q80W76;Q62184;O35703;E9PYJ0;B2RUN1;Q8C641	B2RY22;A0A087WS18;J3QP81;A5D6Q8;A0A087WRK0;A0A087WQF1;E9Q6L0;A0A087WQ95;A0A087WNW8;A0A087WP42;E9QNY9;A0A087WRE8;E9QKH0;A0A087WQ31;Q80TV8-2;Q80TV8	Q8C996	Q8VCT0;Q3U8R7;P35951;Q3TVR4;Q3TDD1;Q91ZJ1	Q8R395	Q3UGN9;Q3TQ49;Q3UMC8;P70297;A2ARJ0	Q8R1S0;D3YW66	Q8R1S0;D3YW66	Q78JW9;Q9CYA9	Q5MJS3	Q80X95	Q2M4G8;O35239	Q2M4G8;O35239	Q9D1M4
	Q8CCK0;Q8BP16;A0PJB8	Q7TSE6;Q7TSE6-2	O08847;P08775	A6H5Z3;A6H5Z3-2;Q6PCN5	P70335-2;P70335	Q7TNV0;Q3U4W4;E9Q8Y1;D3YVJ6;Q9CVL7	Q3UZP4	P51863;Q921S5	Q569Y6;Q9CZY3;B7ZBY7;E9PY39;Q9CZY3-2	Q8BHA3-2;Q8BHA3	E9Q7N5;Q8R2Q4-3;Q8R2Q4-2;Q8R2Q4;Q3TML3;Q3TSU6;Q8C1C2	Q6P5I3;P28474	Q8BVI4;D3Z1A1	Q8BK48	Q80Y52;P07901;Q3UIF3;Q3TKA2;A0PJ91;Q3TKB9;Q3TKG0;Q3TJU7;Q8C5U3	Q8CHP5;Q8CHP5-2	Q543H0;Q64674;Q8BSZ8;Q3UJL7	Q543N5;Q9QYB1	Q3TMZ1;Q922Q4;Q3TJ21	Q99J83	Q3V169;A2N6K9;E9Q046;O35706;L7N265;D3Z452;Q62183;E9Q2X0;Q99206;Q8C5S9;Q80YU2;Q80W76;Q62184;O35703;E9PYJ0;B2RUN1;Q8C641	Q8R1J9;H3BK73;P0C7W3;Q8BT54	J3QP71;K3W4Q8;O55108;O55107;P18572-2;P18572	Q9DBC7;Q3TYK4;Q8C3Z4;Q3UBA7;A2AI69;F8S0Y0	Q5M9L7;Q8BT90;P63276;Q3TK12	Q541E2;Q3TWM2;P51855;Q8R436	P14152	Q8BNU0;Q8BNU0-2	Q8BHN0;Q8BHN0-2	P17156;B7U582	Q9ER58;F6SLR4;Q80U51;Q6PAN0	Q9ER58;F6SLR4;Q80U51;Q6PAN0	Q9QZ06;Q8BQL7;A9JEI5;Q8C5G6	Q9CXS4	Q9R099;Q9CY49	E9QLB8;Q566J8	Q544K9;Q3TVV7;P13439	G5E8V9;E9Q3G5	Q99JB5;Q9CPS5;Q8BKP5;Q3TW90;Q9CX56;Q3TVY0;Q3TG45;Q3TI95;Q3U617	Q9ME04;Q7JCY6;P03911;W0TGY1;F1JVR2;A9UIX0;Q3UQ59;A0A075DCI1	Q8VD31	Q8VD31	Q6XLQ8;Q3TL33
	Q9QZQ8	W6PPR4;W6PPA1;S4R2K9;S4R1S2;G5E8K5-2	Q9QUP5	Q8VD31	Q4VAA9;Q8BP48;Q8R0B2	P61022;B0R091	Q3TJ39;P35278;Q3TCT9;Q8C266	Q6P6M7;Q3U597	P60879-2	G3X9M0;Q9ER88;Q9ER88-2	Q7TQK5;E9QAD4;Q8BUE0;Q8BWK1	Q8BQW4;A2AH25;Q5FWK3;Q8C5A0	P31750;Q8BS26;D3Z783;D3YXX3	Q8R395	P63242	Q6DFW4;A0A087WQ46;A0A087WSU5;A0A087WP00;A0A087WSL8;A0A087WNW0	Q497E9;P62242;Q5M9L9;Q3UJU6;Q9CQW4;Q3UA25	S4R191;S4R1P3;S4R2T3;P0C8K7	Q8VEB4	J3QMM7;K3W4M4;Q9CZ42-3;Q9CZ42;J3QN06	A9E3L2;Q9Z2I2;Q80YE1;Q810R7	Q3TDA7;Q9WVE8;Q3UP40	B9EHP1;Q3U2J5;Q3U2J5-2	Q2M4G8;O35239	Q9JKB3-2;Q68G78;Q9JKB3;Q61478;Q64369;Q8BPG0	Q80WR0;E9Q3G8;Q80UN3	Q5F239;P62254;D6RES1	Q9D1Q4	Q9CQ10	Q3TND6;O54782;F6TMZ3	Q3TJQ2;Q3U866;Q3U399;Q91ZN5-2;Q91ZN5	Q4FK39;Q3UW00;Q9JL16-2;Q9JL16	Q9D1H8	Q7TN29;Q7TN29-2	Q544Y8;Q3UC19;Q3TVQ3;Q3U9K2;Q9D2V3;Q3UD85;Q3UAJ3;Q3U9N4;Q3U8W3;Q3TW77;P28798;Q3UDD6;Q3TX66;Q3TWT4;Q3U5Q6	E9QLB2;Q3UFF7	Q9Z2E1	A2AQA7;Q8CFQ3	Q3UYC0;Q3UYC0-2	Q543M3;Q3UHZ4;Q3U5U9;Q3TT75;P06797;Q3UWH6;Q9D0C0;Q3TVJ1;Q3TNC8	Q9ER72;Q3UXN3	Q8C6E0;Q99JR9	P97855;Q571F9;Q3UR88
	Q9CQ69	Q4FZH3;E9Q317;O55128;D3YY73;D3Z2N9	Q8VD31	E9Q8N5;Q08EB6;Q08EB5;F7DCH5;B9EJA4;Q8BRT1;A2RRR3	Q9D967	Q60749	Q3TB24;Q9QYI5;Q9QYI5-2	Q3V384;F6VT60	Q9DB77	Q9R0H0-2;Q9R0H0;A2A848;Q8C168;Q8BW35	Q3TNH0;Q61029-3;Q61029-2;Q61033-2	Q3UA17;Q791V5;A2AFW6;Q9D050;Q05C68	Q543Y7;Q61644;Q3TYF2	Q3UM57;Q6ZQ73	Q9JKB1;Q8BWQ9	Q542F1;Q9Z1Q5;Q3TIP8	B2CY77;P14206	Q9QZH3	P36916;A2VDH5;Q52KE3;P36916-2	Q8C6F3;G5E897	Q9EQT6	D3Z1H9;Q7TMS6;Q3U011;Q9JL62;D3Z1H8	P23475	Q3V3M3;Q78P92;P97376	Q5SU48;Q7TN98-4;Q7TN98-5;Q7TN98-3;Q7TN98-2;Q7TN98;Q5SU47;Q9D5G2;Q9D5F3;F6T0J8;A1A562;D3YUJ4;E9Q5X2;E9Q969;Q812E0	Q5F239;P62254;D6RES1	Q8K1L5	Q9D1F9;Q9Z295;Q6WG34	Q3UC67;Q8JZR0;Q3UKS0	Q9CQ54;Q9D846	Q8C996	Q91V76	Q3TMH2	P70227	Q3TCW5;Q99J45;D3YUV1	Q7TSE6;Q7TSE6-2	Q91WM1-2;Q91WM1;Q8C5B7	Q91WT7	B1AU74;Q9CWP6-2;Q9CWP6-3;Q9CWP6;Q3U0U1;Q9CWP6-4	Q8BP21;Q545C3;P30285;E9Q9E4;E9PZX7;Q9D193	D3Z1F9;Q8C0M0-2;Q8C0M0;Q8C0M0-3	Q8K1J6;Q8K1J6-2	Q8C292;Q8C1V4;Q3TIV6;Q99MN1;Q8CFK5
	Q80XD3;O54829;Q45FE4;Q45FE5;Q45FE1;Q45FE2;Q45FE3;A0A087WSH2;A0A087WQG6;A0A087WSJ9;A0A087WPW1;F6WDS8;A0A087WNZ9;A0A087WRP8;A0A087WPC4;A0A087WPD1;A0A087WRN0;Q9Z2H2	Q3U9X2;Q9ES84;O35901;O35900;Q9EP83	B7ZP20	B7ZP20	Q9CQX2;Q3TN44;Q3TH64	O88307;Q3UV32	Q9DCT1;Q8CEB6	Q7TMK6;Q3UWV9;Q3TKK8	Q3U6L3;Q9QUH0;Q9D6F8	Q9CPT4	Q3ULP3;Q3TX60;Q62172	Q923F9;E9QPX3;Q9CXZ1;Q9CTT4	Q7TMG8;Q3TD78;O55126	B0LAE4;Q3UBA1;Q3TQE3;Q8C1Y9;Q80ZW9;Q3TIC7;Q3THR3;Q9JKW0	P43274	Q3UKU3;Q9NWG9	Q3TA40;Q8R0A7;Q8BQB5	B2RS09;Q7JJ13-2;Q7JJ13;U3KLT0	P10493	Q9CZ62-2;Q9CZ62;Q8C1I9	A2AFF6;O35638	A8DUN2	Q8VCF1;Q8VCF1-3	Q56A13;Q8BG94;Q8BTK9;Q8CF03;Q8BQS7;A2AU52	Q3UIJ2;Q3TML6;Q9Z0N1;Q3UDF8;Q9CRE9;Q3U5H6;A2AAW9	G5E924;Q3UMT7	Q3TUQ5;O35691;Q9CV89	E9Q2B2;Q5PRE9;Q5RIM6;Q60974-2;Q60974;F7C134;Q8VDE8;E9Q9Y2;Q8CHB6	Q3V384;F6VT60	Q9ME04;Q7JCY6;P03911;W0TGY1;F1JVR2;A9UIX0;Q3UQ59;A0A075DCI1	Q9D1B9	Q9D4H1;Q8K2J3	Q922A2;Q3TJ49;Q07076;Q3UYL7;Q8BP75;Q8CCV9	Q8K3X4	D3Z0F5;Q3UIT2;O88545	Q91WM1-2;Q91WM1;Q8C5B7	Q9DAB3;Q9CQW2	P09055;P09055-2	Q3UQE2;P56386	Q6ZWQ5;Q3TGS7;Q3V2H3;Q99M52;O70493	Q8BVG4;Q8BVG4-2	Q9JJH1	E9PZF0;Q5NC82;Q01768;B0LAA8;Q8R4B4
	P39054;Q3T9X3;F8WIV5;P39054-2;G3UZZ3	G3X9N3;Q3USL6;Q3UPU9	Q8BFW6	Q0PD65;P53994;Q8BXY4;Q6PDZ3	P12968	Q3THG9;A2A4P3;A2A4P4	Q4QQP1;Q9CZG3	Q9DCT1;Q8CEB6	Q8R105	P62717;Q3THJ0	P70677;Q8BNT4	Q3UUH0;Q91YI0;E0CXM2;E0CY49	D3YZP9	Q91WS0	Q04750	Q3UE37	Q9D3M4;Q91V77;Q9JL08;P56565	Q80ZP8;Q3TMX5;A8C1V1;Q9CXI5;F6USD5;F6T4L3;E0CXA8	Q9CXS4	Q99KI0	A8DUN2	Q9D9V9;Q9EQI8	D3Z7C0;Q3UKS6;Q9Z2Q5	E9PZ00;Q3TXJ0;Q8BFQ1;Q3U8C4;Q3TXP9;Q3TWL8;Q3TWM9;Q3UAS4;Q3U897;Q3U825;Q3U5W2;Q3TWF9;Q3TKB2;Q3TIT5;Q3TID4;K3W4L3;B2RUD7;Q3UFE8;J3QPG5;Q61207;Q3TKK3;Q3UE29	P11031	P62774	Q80XL6;D3YTQ5	Q80V26	Q3UQE2;P56386	Q9ERS2	E9Q1Q9;P97328;Q9CPP1;D3YVB6	Q3TJQ2;Q3U866;Q3U399;Q91ZN5-2;Q91ZN5	Q9DB15	Q924L1-3;Q924L1-2;Q924L1	Q9QZE7;Q3TXK6	Q80XD3;O54829;Q45FE4;Q45FE5;Q45FE1;Q45FE2;Q45FE3;A0A087WSH2;A0A087WQG6;A0A087WSJ9;A0A087WPW1;F6WDS8;A0A087WNZ9;A0A087WRP8;A0A087WPC4;A0A087WPD1;A0A087WRN0;Q9Z2H2	Q9D0J4	Q544R7;Q3U6W4;O70252;D3YX62	D3Z1F9;Q8C0M0-2;Q8C0M0;Q8C0M0-3	Q3V3M3;Q78P92;P97376	Q5SRX1;Q5SRX1-2;Q5SRX1-3;Q5SRX1-4;Q5SXA5;Q5SXA4;Q5SRX1-5	Q8VDG5;Q8VDG5-2	Q642K1;Q58EW0;P35980;Q0QEW9;G3UZJ6;G3UZK4
	Q3U9X2;Q9ES84;O35901;O35900;Q9EP83	Q80TU6	D3Z079;Q8K400;D3Z2Q2;Q8K400-2	Q3V384;F6VT60	Q71LX8;P11499	G5E8P4;G3UWY3;B2RWU4;Q5NBX1-2;Q5NBX1-3;Q5NBX1	Q3V384;F6VT60	A2AJ23;Q925Q2;Q64322;A2AJ20;Q8CFL4;A2AJ21	P56135;F8WHP8	Q9D037;Q9CQY3;Q9CPQ8	Q8CH02	Q64471;Q9DCY6;D3Z3X5	A2AMH5;A2AMH3;A2AMH4;Q6X893;Q6X893-2	Q4FJP2;Q3UJ82;O35309	Q3UYN1;Q544R1;Q9Z2Y8;Q6P8V7	Q3UT02;E9Q066;G3X9Q6;Q8BWW4;Q3T9Z3	Q9D9Z5	D3Z0S6;Q62189;Q9CXX7	Q3U7R1;Q3U7R1-2	Q9CZS7;Q544E3;O70172;F6RJE8	Q9D9V9;Q9EQI8	A2AFF6;O35638	E9Q3L2;Q6DIC7	B1AU74;Q9CWP6-2;Q9CWP6-3;Q9CWP6;Q3U0U1;Q9CWP6-4	Q80U93;Q8CHS9	B9EKE9;Q3TQX5;Q62167;B7ZWF1;B9EIA2;P16381	A0MNP4;Q9ERF3;Q8BVQ0;D6RDC7	Q3UIG0;P60229;Q9CT23	Q8BKR5	D6RI47;D3YWI4;E9Q1I6;F8WHT5;G3UVW1;P19258	O88325;O54752	Q5PPR2;Q3U1G4;Q6P1Y9;Q8R3S6	Q3UYC0;Q3UYC0-2	P70677;Q8BNT4	Q9R1P0;Q3TL95;Q3UCF0;E9PW69	P27546-2;P27546;P27546-3;E9PZ43	P62774	Q9CR60	Q9CZ04;Q9CZ04-2;D3Z440;D3YVI6	Q5MJS3	Q9EPK2-4	Q64521;A2AQR0	Q8VC30;Q3UTZ4
	Q80TU6	P39054;Q3T9X3;F8WIV5;P39054-2;G3UZZ3	Q9JKY0	Q3UHB1;Q692V2	P97364	Q8C6B0;Q5K4Q9;Q1XG79;Q9D7S5;Q76I24;Q5I0W6	Q8R1E1;E9QL80;Q6A0A4;Q3UZK0;Q91YX5;D3YVK0	S4R1W1	Q3U9V4;P62880;E9QKR0;D3YZX3;D3Z1M1;D3Z1T4	Q8C2D1	P52479;P52479-2	Q8CG03;Q8BJ62	Q4FK36;Q9R0P5	Q0PD14;Q8BHC1	Q3TDV0;P62700;Q65Z92;Q3TMG7	Q544T5;P00375	Q99KD6;Q3UDK5;E9PZS8;Q61387;Q3U7R2	Q91WG4;Q91WG4-2	Q8C0W0	Q3TY95;Q60823;F8WHG5;Q8CE74;D3YXM7;D3Z3N2	I6L970;Q3TBX5;Q3U3K9;P70295;Q3TAZ9	Q3TJQ2;Q3U866;Q3U399;Q91ZN5-2;Q91ZN5	Q9QXN3-2;Q9QXN3;Q3UJV0;Q3UBZ2	Q3TND6;O54782;F6TMZ3	Q9Z315	Q3TV94;Q52PE3;Q9CY50	B2RQS1;Q9ERG2	P28740-2;E0CZ72;P28740;P28740-1	Q9JM62;Q9JM62-2	B7ZNW0;A1A4A7;Q8BX10	D3YXH0;P63054	B2RY22;A0A087WS18;J3QP81;A5D6Q8;A0A087WRK0;A0A087WQF1;E9Q6L0;A0A087WQ95;A0A087WNW8;A0A087WP42;E9QNY9;A0A087WRE8;E9QKH0;A0A087WQ31;Q80TV8-2;Q80TV8	D3YYW8;Q91V81;Q91V81-2	Q8K1J6;Q8K1J6-2	Q9D168	Q7TNV0;Q3U4W4;E9Q8Y1;D3YVJ6;Q9CVL7	Q7TSE6;Q7TSE6-2	Q9ERG0;Q8C7S2;Q8CD09;Q9ERG0-2;Q8C3R7;Q8BT15	Q3TMH2	Q5RKP0;Q499X4;Q3TXD3;Q62465;Q3U331	Q924L1-3;Q924L1-2;Q924L1	Q3UEQ1;D3YTM1;E9Q9A0;D3YUD3;D3YUL8;D3Z230	Q5GQ64;Q9Z0F7
	Q9CXW3	Q8CFQ9;Q564D0;Q3USY4;P56959;G3UXT7;Q3UK30	Q32MU0;P63239	Q61025;Z4YJL9;Q61025-2	P57759	Q8C4B4;Q8C4B4-2	Q80XN0;D3Z2Y8	Q8R3I2-2;Q8R3I2;Q8R3I2-3	Q62470;Q62470-2;Q62470-3	Q8K0H5	Q9DD05;P10518;Q8VCZ1;O89061	Q80SW1	Q3TQY2;Q8CBY8-2;Q8CBY8	Q6P6M7;Q3U597	Q8CGP5;A0AUV1;A3KPD0;B2RVF0;A2AB79;Q8CGP6;Q8BFU2;P22752;Q8CGP7	Q6ZPJ3	Q8BN32;P29341;Q3U8U8;Q99KL3	Q8CDM8	Q571E4;Q8CC47	Q3TND6;O54782;F6TMZ3	Q91WS0	D3Z7P3-2	Q8CIH9;Q3TUW2;Q3UGA8;Q3TKC5;Q3UGU3	Q7TQ39	Q9JJE1;Q3U3F4;Q3TMJ8;P31938;Q3UK05;Q3TMW4	Q7TT04;Q3UJY4;P59235;Q3URN3	Q9QZH3	Q8K3X6	Q8BVK3;Q3TW96;Q3TW96-2	Q3THC1;Q9CR00;Q3ULI3;Q9CZZ4	Q3UDY1;P45376;Q5U415;Q3TCL2;D3YVJ7;Q3ULP0	O88325;O54752	Q9CQ65	B2RPS1;Q0PD56;P61021;Q8C458	D3Z3A0;Q9DCL8;Q8BVM6;Q9CT86	P62774	Q9DC36;Q8CDE0;Q5SS83;Q3UEG9;Q60634-3;Q60634-2;Q60634	Q64727	Q9CQ10	Q9JM62;Q9JM62-2	Q8BM72	Q9CRB9;Q91VG6	Q9R190;Q3TZP3;Q3UDZ8
	P51174	Q8VE38-2;Q8VE38	Q3V384;F6VT60	P70704-2;A1L332;F6WYQ5;P70704-3;Q5DTG0;P70704;Q8CA15;Q52KQ7	Q69ZA1-2;Q69ZA1	Q9JMH6-2;Q9JMH6	Q3TIX9	A0A087WRI8;G5E8E3;Q8R3Y5-2;Q8R3Y5	Q99JW2	Q8VE22;F7ARZ1;Q3TI14;Q3THH3;Q99LZ4;Q5SXC9;A7M7Q8	Q4VA21;Q3TQM5;Q8BH16	Q6Q477;D1FNM9;Q32ME1;F7AAP4;D1FNM8;H2BL43;E9Q828	Q78IK2	Q80TJ1-2;K4DI76;J3QJW3;Q80TJ1-4;Q80TJ1	Q3U3H9;P61963;Q80ZU1	P35283;A2CG35	Q3UH60;D3Z5G8;Q3UH60-2	Q9QXS1-16;Q6S390;Q6S388;Q6S392;Q6S393;Q6S387;Q6S385;Q9QXS1-15;Q9QXS1-10;Q9QXS1-9;Q9QXS1-12;Q9QXS1-11;Q9QXS1-13;Q9QXS1-5;Q9QXS1-3;Q9QXS1-4;Q9QXS1-14;Q9QXS1-6;Q9QXS1-7;Q9QXS1-8;Q9QXS1-2;Q9QXS1;E9Q3W4	Q91X97;D3YVA2;D3Z2Z8	Q78P93;Q3U646;Q9WV54;Q3U8A7;Q3TWT5	Q99L27	Q91WS0	Q9CZ04;Q9CZ04-2;D3Z440;D3YVI6	Q6PDI6;Q6PDI6-3	S4R1F9;S4R249;Q8C8R3-2;S4R2H6;S4R2F3;S4R285;Q8C8R3;S4R2D0;Q8C8R3-5;S4R1J9;S4R2T7	Q9QZH3	Q9CQX2;Q3TN44;Q3TH64	Q6PHU5;Q6PHU5-2	Q3TD41;Q3UGF2;Q1AJD0;Q5SVQ0-4;Q5SVQ0-2;Q5SVQ0-3;Q5SVQ0	Q544B1;Q3UJW1;Q3U9J7;Q3TVM2;P47738;Q3U6I3	Q8BH15-4;Q8BH15-3;Q8BH15;Q8BH15-2;Q8BH15-5	Q8BH15-4;Q8BH15-3;Q8BH15;Q8BH15-2;Q8BH15-5	Q9CWZ7;Q8C1T5;D3Z4B2	Q8R0Q6;Q3UHG5;Q6PDN6;Q62283	Q6P1A9;Q5EBG5;Q58ET1;Q80UT7;P12970	Q9DC36;Q8CDE0;Q5SS83;Q3UEG9;Q60634-3;Q60634-2;Q60634	E3SRG7;E3SRG8;E3SRH0;Q811W8;P97471;E3SRG9	E9QNH7;Q5CZX6;Q5XG73-2;Q5XG73-3;Q5XG73	Q91YP0	Q4VBC9;O09111	Q543M3;Q3UHZ4;Q3U5U9;Q3TT75;P06797;Q3UWH6;Q9D0C0;Q3TVJ1;Q3TNC8	Q8BVG4;Q8BVG4-2	Q8BTY8;Q3UPD0;Q8BTY8-2;Q3UXF7;D3Z4T4
	Q8C052;B2RWW1	Q3UUF0;Q8C541;O08914;Q8BRM1	P70704-2;A1L332;F6WYQ5;P70704-3;Q5DTG0;P70704;Q8CA15;Q52KQ7	Q7TMC8;Q8C7W3;Q7TSB1;Q8CI18;Q6KAP2	F6ZDS4	B2M1R7;Q61990;Q61990-3;Q3TF69	F8VQ95;Q6Y685;Q6Y685-2	Q544R7;Q3U6W4;O70252;D3YX62	Q8BTJ1;Q543K5;Q3ULZ3;Q99K85;Q3U6K9	Q6ZWU9	Q9D927	Q1XID4;Q9CYN9	E9QKB2;Q9JKS5	I1E4X5;Q8BWQ6;D3YW20;D3YW19;Q8BWQ6-3	D3Z1F7;Q9DBN4;D3YXF2;Q9DBN4-3;Q9DBN4-2	Q3THG9;A2A4P3;A2A4P4	Q8BGS2;Q8BGS2-2	Q9D0R2;Q3U630	Q91YP0	Q548L6;P48318;D3Z1L8;Q8C6I7;D3Z5S3	Q9CRB9;Q91VG6	Q496X5;Q3UW05;P10601	Q3V331;Q3UG14;P62881-2;P62881;Q9CU21	Q9EPK6	Q61177;Q60737;Q9D0E8;Q8CD20	Q9CQX2;Q3TN44;Q3TH64	G5E924;Q3UMT7	B1ATP7;Q3U0M8;Q80Y81-2;Q80Y81	Q9CZ04;Q9CZ04-2;D3Z440;D3YVI6	Q8CBY0	Q9D4H1;Q8K2J3	P98083;P98083-2;P98083-3	Q9QXY6;Q8R0V6	Q3TD41;Q3UGF2;Q1AJD0;Q5SVQ0-4;Q5SVQ0-2;Q5SVQ0-3;Q5SVQ0	Q922Q9-2;Q922Q9;D3YWG2;G8JL55;Q9CRU8	F6TCF9;Q60739-2;Q60739;Q9CUY1	Q7TNV0;Q3U4W4;E9Q8Y1;D3YVJ6;Q9CVL7	Q9QXT0	Q0P6I6	Q3TMB8;P54822;E9Q242;E9Q3T7	B2RY22;A0A087WS18;J3QP81;A5D6Q8;A0A087WRK0;A0A087WQF1;E9Q6L0;A0A087WQ95;A0A087WNW8;A0A087WP42;E9QNY9;A0A087WRE8;E9QKH0;A0A087WQ31;Q80TV8-2;Q80TV8	Q9ER72;Q3UXN3	Q5RKP4;Q91YQ5;Q8BMR3;Q3U900;Q99LY0
	A0A087WQH8	Q9CQJ4;A0A087WRE9	Q3TV22;P97792-2;P97792	Q9D8V0;Q9D8V0-3	P40142	Q642L7;P62983;A5JUZ1;E9Q9J0;Q8C2K3;E9Q5F6;Q922B0;Q5SX22;Q3TH47;Q78XY9;Q6NZC5;Q8R0Z9;Q922Z8;Q8VC46;P0CG49;P0CG50	P17156;B7U582	Q91YP0	B2RRH9;Q3THK7	Q3TGU7;P50580;Q05BN2;Q3UMW2;D3YVH7	Q8VCT0;Q3U8R7;P35951;Q3TVR4;Q3TDD1;Q91ZJ1	D3Z079;Q8K400;D3Z2Q2;Q8K400-2	Q8BWR2;B1AV57;Q8BWR2-2	Q9JIS5	Q5NCJ9;Q8R1I1	A2A5Y6;P10637;P10637-6;Q8C5K4;Q76M61;B1AQW6;B1AQW5	Q8CCP0;Q8CCP0-2;Q8CCP0-3	Q64514-2;Q3TW28;Q3U4M7;Q3TB11	Q9CQ40;Q8BTB8	Q91YP0	Q8R1J9;H3BK73;P0C7W3;Q8BT54	Q4FJK0;Q9CQ62	Q9CRB9;Q91VG6	Q9CQ54;Q9D846	Q9Z2Q6;B7ZNM7;Q52KH2	P14152	Q7TT04;Q3UJY4;P59235;Q3URN3	Q91V01	Q544B1;Q3UJW1;Q3U9J7;Q3TVM2;P47738;Q3U6I3	Q3UEQ1;D3YTM1;E9Q9A0;D3YUD3;D3YUL8;D3Z230	Q6ZWQ5;Q3TGS7;Q3V2H3;Q99M52;O70493	A2AKH7;Q8JZX5;Q9CSK4;Q9D1G5	C7G3P2;Q61136;Q8BPG8	Q2M4G8;O35239	B2RQS1;Q9ERG2	Q9D0J4	A2AP93;A2AP92;Q543B5;Q3TXG1;Q923A8;Q62073	Q791G4;Q9R0M4;Q3UYF4;Q8VIQ4	Q3UC67;Q8JZR0;Q3UKS0	Q9QWR8	B2RUS7;Q8BNE2;Q6PGE2;Q9Z2P1	Q543M3;Q3UHZ4;Q3U5U9;Q3TT75;P06797;Q3UWH6;Q9D0C0;Q3TVJ1;Q3TNC8	Q3UVN5;Q9CZ44;Q9CZ44-3;Q3KQQ1;A2AT02;Q9CZ44-2
	Q3TPJ8;A2BFF7;A2BFF9;D6Q0F6;D6Q0F5;O88487;A2BFF8;D6Q0F7;A2BFF5;Q3UDA2	P62918;Q3UJS0;Q3THC7;Q9Z237	Q0PD65;P53994;Q8BXY4;Q6PDZ3	Q3TV22;P97792-2;P97792	P12815;Q8C5M4;P12815-2;Q3UGE5	Q3U6U7;P32921-2;Q3UDG2;Q4FJZ4;P32921	Q501L4;Q3UAY3;Q8BMQ2;Q3UJL1;E9Q2B0;Q8BMQ2-2	F8VQ95;Q6Y685;Q6Y685-2	Q3TX38;Q3TTN3;Q60931;J3QMG3	Q58E49;O09106;D3YYI8	Q544R7;Q3U6W4;O70252;D3YX62	Q9R1C6;F2Z490;Q8C8R9	F8WGT1;Q68FL4;Q80TQ9;F8WI65;Q68FL4-2;H3BKT5	Q80XN0;D3Z2Y8	Q8BGT8;F7D3N3;Q8BGT8-2;F6U6Z2	Q8K0M3;Q9R1Z8	Q9CQJ2;D3YZF4;D3Z484;D3Z026	Q8BKC5;Q8BKC5-2;Q3TT04;Q7TN23	Q924L1-3;Q924L1-2;Q924L1	Q8C996	Q496X5;Q3UW05;P10601	D6RI47;D3YWI4;E9Q1I6;F8WHT5;G3UVW1;P19258	Q924L1-3;Q924L1-2;Q924L1	Q3U5Q7	Q3TQR3;P59325;Q3TKY2;Q8BVV6;Q05CM5;Q05CH7;Q3TT65;Q6PHA6;Q05C65	Q3TF41;Q8BSH9;P28656;E9PW66	V9GXH3;V9GXF0;V9GXP8;F8VPM7;Q99MI1;V9GWT6;Q99MI1-2;V9GX53;Q99MI1-4	Q8BGW6-2;Q8BGW6	Q80V26	Q11011;E9Q039;F6QYF8;E9Q6F4	Q5PPR2;Q3U1G4;Q6P1Y9;Q8R3S6	O35459;F7B227	Q3TD41;Q3UGF2;Q1AJD0;Q5SVQ0-4;Q5SVQ0-2;Q5SVQ0-3;Q5SVQ0	Q5MJS3	A1L0U3;B9EI85;P84228;A1L0V4;P68433;F8WI35	Q69ZW3-2;Q69ZW3	Q91YQ8;O09174;Q3TUS8	P70280	Q922A2;Q3TJ49;Q07076;Q3UYL7;Q8BP75;Q8CCV9	Q8QZW3	Q7TQ39	B2RUS7;Q8BNE2;Q6PGE2;Q9Z2P1	O70305-2;E9QM77;O70305;O70305-3;F6U2C2;Q3UX07;F7B6X4;Q3UX51
	Q3UCC6;Q9Z2I9;Q3U6C7	Q6PIU9	A6H5Z3;A6H5Z3-2;Q6PCN5	Q9CQ65	Q5FWB7;P05064;A6ZI44;Q6NY00;D3YWI1;Q9CPQ9	D3YZZ5;E9Q7G1	Q9DD05;P10518;Q8VCZ1;O89061	Q80X95	Q99KG3-2	O54962	D3YUP1;Q9WVG6-2;Q9WVG6	Q99K01-2	Q9CZC8	P70302	Q6ZWQ9;Q9D6E6;Q9CXD2;Q922W7	E9PUC4;Q6NSW3-2;Q6NSW3;Q6NSW3-3;Q6NSW3-4;Q9CTQ1	Q8R010;Q8R3V2	Q99JY8	S4R1W1	Q8K131	Q3TJQ2;Q3U866;Q3U399;Q91ZN5-2;Q91ZN5	Q99L27	Q6PGG8;Q80VL1	Q4FJK0;Q9CQ62	Q3TPZ5;Q99KJ8	Q8BUY5	Q80WR0;E9Q3G8;Q80UN3	Q3TI70;Q8BGR2	Q543F6;P49615	Q91YP0	Q4VAE8;Q9CQC7;Q9DBH2	Q9D1B9	D3Z7C0;Q3UKS6;Q9Z2Q5	Q3TJQ2;Q3U866;Q3U399;Q91ZN5-2;Q91ZN5	Q61024;Q3TV20;Q3TIA9	Q8C6E3;Q542K4;Q3UZE7;Q3TVZ1;P24270;Q3UF58;Q91XI2	Q5XJY5;Q3U4S9;Q8R1S6;Q3TDU1;Q8C0G7	Q5HZI6;P23591	Q71FD5	P28028	Q3UC67;Q8JZR0;Q3UKS0	Q3TDA7;Q9WVE8;Q3UP40	O35295
	Q9Z130	Q6QWF9	Q8C4Y3;Q69ZP4	Q6PAV2-2;Q6PAV2	P61458	O88845;Q3TR91;O88845-3	P51863;Q921S5	A2ACD2	P62814	Q8C476;Q543C2;Q99PM9	Q9EQT6	Q56A13;Q8BG94;Q8BTK9;Q8CF03;Q8BQS7;A2AU52	Q8CC88;Q8CC88-2	U5LK19;E9Q5B0;Q80VC9-2;Q80VC9;U5LGS1;U5LHW1;U5LK70;U5LK15;U5LHT8;U5LGR7;U5LGT0;U5LHW9	Q4W8U9	Q3UXD9;Q99MZ7;D6RHN4;D6RIP0	P16045	Q80U93;Q8CHS9	Q9R0M7;Q91X42	Q8BVG4;Q8BVG4-2	D3Z1H9;Q7TMS6;Q3U011;Q9JL62;D3Z1H8	A2ATI9;Q99JX3;Q3TG07;Q3TX06;Q3TIK1;A2ATI8;A2ATI6;Q99JX3-2;Q3V458	Q3TLP5;Q3TLP5-2;F6YTG0;Q3TLP5-3	E9Q8N5;Q08EB6;Q08EB5;F7DCH5;B9EJA4;Q8BRT1;A2RRR3	E9PZ91;O89106;E9PVU9	Q80XL6;D3YTQ5	P28651	Q3UHW9;P45591	Q91YP0	A2AKH7;Q8JZX5;Q9CSK4;Q9D1G5	P98083;P98083-2;P98083-3	Q8BP21;Q545C3;P30285;E9Q9E4;E9PZX7;Q9D193	Q8C6E0;Q99JR9	B1AU74;Q9CWP6-2;Q9CWP6-3;Q9CWP6;Q3U0U1;Q9CWP6-4	A2AWN8;P59326;Q3TH60	P16546	Q3TUQ5;O35691;Q9CV89	Q9CQW1	Q80V26	Q9DB73;G3UZG6;Q9DB73-2	Q3UEQ1;D3YTM1;E9Q9A0;D3YUD3;D3YUL8;D3Z230	Q8QZW3	Q9D0L8;Q9D0L8-2;Q9D0L8-3;D3YYS7;D3Z478
	P12787	Q9QZQ8	Q8BH40;O70439;Q9JMJ6;Q9DCE1	Q6GT24;Q6A0D0;D3Z0Y2;Q8BPD3	Q3UBA6;P63017;Q3U9L2;Q3TEK2;Q504P4;Q3TRH3;Q3TQ13;Q3ULM1;Q3TH56;Q3TZJ3;Q3KQJ4;Q3UDS0;Q3TH04;Q3TB63;Q3UXU1	Q5F285	Q52L66;Q91W67	P68404-2;P68404	Q8CIN4	Q9Z2X1;Q9Z2X1-2;J3QM80;J3QMT0	Q8VDQ8;Q8VDQ8-2;Q3UJK6;Q8VDQ8-3;Q8VDQ8-4	Q542R8;O70443;Q3UYF9	Q9DCS9	Q9QZ06;Q8BQL7;A9JEI5;Q8C5G6	Q91Z38;Q3TDF3;A2AJK8	Q3TA69;E9Q912;E9Q6Q4;Q3TU36;Q3TPS9;Q8BKH0;Q3TYN8	Q3UZJ4;Q61151	Q3UFY7-4;Q3UFY7;Q3UFY7-2	D3Z1H9;Q7TMS6;Q3U011;Q9JL62;D3Z1H8	Q99K86;Q9R069;Q8BGB4	Q3UDY1;P45376;Q5U415;Q3TCL2;D3YVJ7;Q3ULP0	Q9CRB9;Q91VG6	Q8R1K4;Q8R1K4-2;F8WHK6;Q8R1K4-3	Q9JJU8;Q3U9A8	Q3U931;Q542W3;Q3U541;P97379-2;P97379;Q3U6B1	B2RQS1;Q9ERG2	P62774	Q9WTI7-3;Q9WTI7-2;Q9WTI7;Q9WTI7-4	Q5SSZ5;Q5SSZ5-2	Q8VCF1;Q8VCF1-3	Q9QZ06;Q8BQL7;A9JEI5;Q8C5G6	Q6ZWQ5;Q3TGS7;Q3V2H3;Q99M52;O70493	D3YU12;Q8K2T1;G5E8S7;Q8K2T1-2	D3Z1H9;Q7TMS6;Q3U011;Q9JL62;D3Z1H8	Q99M46;P97760;Q9DB22;Q3UUX3	Q9JKX6	E9QLB8;Q566J8	Q3V3R1	E9Q8N5;Q08EB6;Q08EB5;F7DCH5;B9EJA4;Q8BRT1;A2RRR3	Q60902-4;Q60902-2;Q60902;Q60902-3	P56376;Q4VAF0;E9QJT5	Q924L1-3;Q924L1-2;Q924L1	P54731
	G3X9N3;Q3USL6;Q3UPU9	Q5BLK0;P35979;Q8C2K0;Q3TIQ2	E9Q8N5;Q08EB6;Q08EB5;F7DCH5;B9EJA4;Q8BRT1;A2RRR3	Q8BH40;O70439;Q9JMJ6;Q9DCE1	P36552;Q3U029	Q99M46;P97760;Q9DB22;Q3UUX3	Q543N6;P58389;Q8C0E1;A2AWE9;A2AWF0	Q3UGR5;Q3UGR5-2	Q9D037;Q9CQY3;Q9CPQ8	P62141	Q5DTS4;S4R1W5;Q8R388;O88720;Q3ULB0	Q64521;A2AQR0	B2RS41;Q8BWF0	Q8BVG4;Q8BVG4-2	Q5XJY5;Q3U4S9;Q8R1S6;Q3TDU1;Q8C0G7	Q497E9;P62242;Q5M9L9;Q3UJU6;Q9CQW4;Q3UA25;Q9CRJ5	Q9CQ56;Q5I940;Q05CJ0;Q9CQ56-2	A3KML3;P68254;F6VW30;P68254-2;F6YY69	Q71FD5	Q8C140;Q9QXX4;Q91YK1	Q548L0;Q3UJ69;Q61624;Q91XQ8;Q8CB43	Q8BGX2	Q78IK2	P70677;Q8BNT4	Q3UK39;Q3UJN1;P97310	P28651	Q5U452;Q99PW4	P81117	Q99J83	Q8R3N6;Q3UTN0	D3YWD8;Q2VWQ2	Q3UDY1;P45376;Q5U415;Q3TCL2;D3YVJ7;Q3ULP0	Q99L27	Q8BHN0;Q8BHN0-2	Q9DCB1	A2AP93;A2AP92;Q543B5;Q3TXG1;Q923A8;Q62073	F6TCF9;Q60739-2;Q60739;Q9CUY1	D3YW48;O88456	D3YWK1;Q80W47	D3Z1H9;Q7TMS6;Q3U011;Q9JL62;D3Z1H8	O88325;O54752	Q3UC67;Q8JZR0;Q3UKS0	Q01853;Q8BNF8
	Q3U931;Q542W3;Q3U541;P97379-2;P97379;Q3U6B1	Q8BX80;Q3TAJ0;F7CXI4	E9Q2W8;Q9D920	P15626;D3YX76	P57722;P57722-2;E9Q7D8;Q8CFQ6	Q3U484;Q62095	Q7TQK5;E9QAD4;Q8BUE0;Q8BWK1	Q9D927	Q6QWF9	Q9CXW2	Q549D0;Q3UC80;Q8BT06;P41731	Q6T5E4;A2IQH4;Q8BK09	Q8K3L3;F2Z3X6;Q810Z4;Q3UHZ0;Q3UGN6;Q9Z2A0;F2Z3Z9;Q3UEW8;F2Z400;Q3TRL2	Q545H3;Q3UBR8;Q9Z0V7;A2AES1	Q564F3;Q3UAC2;P97351;Q9D1S3;Q3UJU5;Q3U5P8	Q3UZJ4;Q61151;A0PJ98	D3YVW2;Q8BXA1	B9EIE9;P46664	Q9D1H8	Q99JB5;Q9CPS5;Q8BKP5;Q3TW90;Q9CX56;Q3TVY0;Q3TG45;Q3TI95;Q3U617	Q80U35-2;Q80U35	Q3UDY1;P45376;Q5U415;Q3TCL2;D3YVJ7;Q3ULP0	Q9CXS4	Q8VH34;Q3TX84;Q3TA96;Q9DC13;P11438;Q922T9	P47963;Q5RKP3	Q4FZG2;Q545P3;P46656;Q3UG56	Q4FZG2;Q545P3;P46656;Q3UG56	Q61735-2;Q3U967;E5Q371;Q61735	E9Q8N5;Q08EB6;Q08EB5;F7DCH5;B9EJA4;Q8BRT1;A2RRR3	Q8C140;Q9QXX4;Q91YK1	A2AKH7;Q8JZX5;Q9CSK4;Q9D1G5	D3YWD8;Q2VWQ2	Q6NSU3	Q8BVG4;Q8BVG4-2	Q3UZ63;Q3UL31;Q6NZF1;Q3TIV2	Q9DAB3;Q9CQW2	Q9JKX6	Q91YJ3;Q8BJZ7	Q8BRF7;Q8BRF7-3;Q8BRF7-2	Q9QZ06;Q8BQL7;A9JEI5;Q8C5G6	Q9JJH1	Q9EPK2-4	Q9D964
	Q8VE38-2;Q8VE38	Q8R344	Q64442	P48774;E9PVM7;E9PV63	B7ZWI2;B2RXM7;Q9D1J3	O09131	Q80X95	Q501L4;Q3UAY3;Q8BMQ2;Q3UJL1;E9Q2B0;Q8BMQ2-2	O35405	P62196;Q99KR1;Q8K1K2	Q9Z266;Q3UY32;Q9Z266-2	Q61687	Q6ZWV7;G3UWD7	Q9QXN3-2;Q9QXN3;Q3UJV0;Q3UBZ2	A2VCP7;A2AU35;Q8BHL8	A2API8;F7AA26;O54931-2;O54931;Q99L95;Q69ZV5;O54931-5;O54931-4;O54931-3;Q8C9L6;A2APJ1;A2API9	B9EKP5;B7FAU9;Q8BTM8;B7FAV1;Q6KAM8	Q69ZX3;E9QPE7;Q8R384;O08638;O08638-2	P70704-2;A1L332;F6WYQ5;P70704-3;Q5DTG0;P70704;Q8CA15;Q52KQ7	Q91V76	A2ATI9;Q99JX3;Q3TG07;Q3TX06;Q3TIK1;A2ATI8;A2ATI6;Q99JX3-2;Q3V458	Q9CZ62-2;Q9CZ62;Q8C1I9	Q5QGU0;G3X8R0;Q9CQG4;Q921E4	B1AY10;B1AY10-2;B1AY10-3	Q3UJB0;Q3UAI4;Q80W39;Q3UBH2;Q3UQU5;Q8BL33	Q60749	B9EKE9;Q3TQX5;Q62167;B7ZWF1;B9EIA2;P16381	P58022-2;P58022	Q3TMB8;P54822;E9Q242;E9Q3T7	Q9CRB9;Q91VG6	O35459;F7B227	P10649;A2AE89	D3YZR1;Q9JHE7;D3Z6S3;D3YYU6	Q9WTZ1;D3Z497	Q8C9B9	Q9D031;Q01730;Q3TFN7;A2AUR7;Q9CSE4;Q9CUS2	Q8C6E3;Q542K4;Q3UZE7;Q3TVZ1;P24270;Q3UF58;Q91XI2	Q5D098;P70195	Q8BVK3;Q3TW96;Q3TW96-2	Q8VDG5;Q8VDG5-2	Q3U2Z6;Q3TDY6;O89023	Q543Q4;P35276;Q8BP17	Q8R010;Q8R3V2
	Q9D0K8;Q5RL57;Q3TLG2;Q9R0L7	Q91V64;Q9D096	Q9CQ65	Q8C140;Q9QXX4;Q91YK1	Q8BGR9	Q8R326-2;Q8R326	Q545Q2;Q64310;Q3U7E6;E0CXD9;F7CH13	Q7TQK5;E9QAD4;Q8BUE0;Q8BWK1	E9PX68;Q5BKS1;O54716;E9Q585;Q3UHY0;E9Q1Q0;Q3UUI2;Q6GQW1	P67778;Q5SQG5;Q3TV00	Q8K354	Q8VCG1;Q9CQ43;Q9JJ44	Q9JLZ3;F6RT60;F6R307	Q6PHU5;Q6PHU5-2	Q3UBP6;Q3UBQ4	Q8CCP0;Q8CCP0-2;Q8CCP0-3;Q8CCP0-4	E9QQ10	Q9Z0S9;Q62145	Q9EP69	Q543M3;Q3UHZ4;Q3U5U9;Q3TT75;P06797;Q3UWH6;Q9D0C0;Q3TVJ1;Q3TNC8	D6RI47;D3YWI4;E9Q1I6;F8WHT5;G3UVW1;P19258	Q4FK39;Q3UW00;Q9JL16-2;Q9JL16	B2RY22;A0A087WS18;J3QP81;A5D6Q8;A0A087WRK0;A0A087WQF1;E9Q6L0;A0A087WQ95;A0A087WNW8;A0A087WP42;E9QNY9;A0A087WRE8;E9QKH0;A0A087WQ31;Q80TV8-2;Q80TV8	Q91YL3	Q2TPA8;Q9D015;Q99JH2;B1AX78	Q9Z315	Q9R1K9;Z4YJH1;B1AUQ7	P50543	Q99JB5;Q9CPS5;Q8BKP5;Q3TW90;Q9CX56;Q3TVY0;Q3TG45;Q3TI95;Q3U617	Q9JM62;Q9JM62-2	Q3TND6;O54782;F6TMZ3	Q52L66;Q91W67	Q9D1B9	B2RXC1	P68372;Q9CVR0;Q9DCR1	O88428;Q9QYS0	P55937-1;P55937	Q9D964	P68181;P68181-2;P68181-3;P68181-4	B7ZMT9;B9EHC3;Q9JME2	Q543N6;P58389;Q8C0E1;A2AWE9;A2AWF0	P56376;Q4VAF0;E9QJT5	Q5D098;P70195
	Q2M4J2;Q9Z1B3-2;Q9Z1B3-3;Q9Z1B3;Q6ZQ92;Q3UPW0	Q9CQ69	Q3UWH3;Q3TL56;Q80X41-2;Q80X41-5;Q80X41-3;Q80X41	Q8C4Y3;Q69ZP4	Q60973;A2AFI9;A2AFJ1;Q3UJI2;Q3UX53;Q8C5H3	A2A8L5;F6Y3V0;F6S1X8	A2AJ23;Q925Q2;Q64322;A2AJ20;Q8CFL4;A2AJ21	P11352	P63038	Q6QWF9	Q6GT24;Q6A0D0;D3Z0Y2;Q8BPD3	Q80YA7	Q548L6;P48318;D3Z1L8;Q8C6I7;D3Z5S3	Q9CZS7;Q544E3;O70172;F6RJE8	D3Z670	Q5F258;Q68FF6;Q3V322;F7BIK4;Q80XR8;J3QK07;D3Z1I2;Q5DU47;E9PVA6;Q9JLQ2;D3Z409;F6WV69;Q3UGB1;F6U8T2	P21981	P50544;B1AR28;Q3UJR6	B2RY22;A0A087WS18;J3QP81;A5D6Q8;A0A087WRK0;A0A087WQF1;E9Q6L0;A0A087WQ95;A0A087WNW8;A0A087WP42;E9QNY9;A0A087WRE8;E9QKH0;A0A087WQ31;Q80TV8-2;Q80TV8	Q60902-4;Q60902-2;Q60902;Q60902-3	Q4FK39;Q3UW00;Q9JL16-2;Q9JL16	Q548L0;Q3UJ69;Q61624;Q91XQ8;Q8CB43	D3YYW8;Q91V81;Q91V81-2	Q9JJH1	A2AT37	Q9R1K9;Z4YJH1;B1AUQ7	Q8BUY5	F8VQC1;Q3UZL8;A0JLN1;E9Q740	Q9D020-1;Q9D020	Q3U4P3;Q8K1M6-4	Q3TD41;Q3UGF2;Q1AJD0;Q5SVQ0-4;Q5SVQ0-2;Q5SVQ0-3;Q5SVQ0	Q3TND6;O54782;F6TMZ3	Q9D0A3	Q9ER58;F6SLR4;Q80U51;Q6PAN0	A0PJL3;Q6PDS3;Q6PDS3-3;Q6PDS3-2	O88967	O88967	Q544Z6;Q3TXJ7;Q07813;Q8K3J2	Q9R0M7;Q91X42	Q9ER72;Q3UXN3	Q9CZ62-2;Q9CZ62;Q8C1I9	Q3ULN8;Q6PD03	Q99LG0;D3YVU1
	Q8C5B4	Q3TLX1;Q99KQ4	Q9D020-1;Q9D020	Q5I012-3;J3QNE8;Q5I012;Q99JV6;Q7TMR2	Q3THA6;Q8BL97-3;Q8BL97-4;Q8BL97-2;Q8BL97	Q9D1R9	Q91YP0	Q69ZZ8;G5E8Q8	O35954	O54988	Q9QXY6;Q8R0V6	Q3TAJ6;P58854;Q3TN67;Q80U29	Q8CAK1	Q925I1;Q925I1-2	E0CY18;A0A087WPF5;Q91X58	Q58EU6;P47962;Q3U850;Q3TKR5;D3YYV8;Q3THE1	Z4YJT3;Q6ZQ58	A1BN54;Q7TPR4	O89032-2;O89032;O89032-3	P70677;Q8BNT4	Q4FJK0;Q9CQ62	Q80U35-2;Q80U35	Q71FD5	Q9ER38	Q3UE99;A2RTI3;O89017	Q3TUQ5;O35691;Q9CV89	Q60749	Q8VD31	P70704-2;A1L332;F6WYQ5;P70704-3;Q5DTG0;P70704;Q8CA15;Q52KQ7	Q9CZ62-2;Q9CZ62;Q8C1I9	Q8BP21;Q545C3;P30285;E9Q9E4;E9PZX7;Q9D193	Q9QZ06;Q8BQL7;A9JEI5;Q8C5G6	Q571M4;Q8VC28	Q8BK48	Q9JKV1;Q8VCI8;D3YUD8	Q6ZWQ6;P61087;Q3TL77;D3Z4U3	Q642K1;Q58EW0;P35980;Q0QEW9;G3UZJ6;G3UZK4	Q9QZH3	Q9ER72;Q3UXN3	B2RXC1	Q8K1J6;Q8K1J6-2	O88325;O54752	Q8R059
	A2AEX8;A2AEX6;P97447;A2AEX7;A2AEY1;A2AEY2;P97447-2	Q8CCK0;Q8BP16;A0PJB8	P48774;E9PVM7;E9PV63	D3Z1H9;Q7TMS6;Q3U011;Q9JL62;D3Z1H8	P34022;H7BX22;Q3U6M5	P57722;P57722-2;E9Q7D8;Q8CFQ6	Q8K1J6;Q8K1J6-2	D3Z5I1;Q3UPF5-2;Q3UPF5;G3X9X5;Q8K302	Q9CPQ3;Q3UBW3	G3UXL2;Q9D7G0;Q3TI27;Q3UPD5;Q3UYQ0	A2ARP8;Q9QYR6;Q9QYR6-2	Q8C4G3;Q8C288;Q505G9;A2AQC3;Q6DI68;O70228	Q61425	Q9D1H8	Q8BH44;G3UW48	Q9QZH6;J3KMM6	Q3U102;Q925F2;Q05CZ9;D3Z5Y0	Q5BL07-2;Q5BL07;F6RUH9	Q3TCD4;Q9WUR2-2;Q9WUR2;E9PYC6;E9Q858;E9PUY9;E9PYA9;E9PVM6;E9Q7A8	Q3U9X3;Q91WE2;Q05CB0	Q8BGX2	Q8R121;Q8R121-2	Q9JKN1	Q9JM62;Q9JM62-2	Q9D6U8	Q8BN32;P29341;Q3U8U8;Q99KL3	E0CXN5;P13707	Q6PEE6;Q69ZW4;P17427;Q3U7X9	P68181;P68181-2;P68181-3;P68181-4	Q8CJ40;Q8CJ40-3;Q8CJ40-2	Q52L66;Q91W67	Q4VAE8;Q9CQC7;Q9DBH2	Q4VAE8;Q9CQC7;Q9DBH2	Q6P6M7;Q3U597	Q3ULN2;P62915;Q3UZJ3;Q3UNY0	Q4FZL1;Q5F2A7;P60843;Q3UXC2;Q3TGK7;Q3TFG3;Q3TLL6;Q3U8I0;Q78WR5	P16546	G3X8Y3;Q80UM3	Q571M4;Q8VC28	D6RI47;D3YWI4;E9Q1I6;F8WHT5;G3UVW1;P19258	Q8QZW3	Q9CZ62-2;Q9CZ62;Q8C1I9	Q3U506;Q3TLJ5;Q99LM2;Q3TSS9
	Q9EPU0-2;Q9EPU0	Q9D8U3	Q8CBY0	Q7TMK6;Q3UWV9;Q3TKK8	Q91WM2	F8WIX8;B2RWH3;Q6GSS7;Q149V4;Q64523	Q7TMK6;Q3UWV9;Q3TKK8	Q542C3;P59114	P60824;K4DI65;D3YU80	B2RRX1;P60710;Q3UAF7;Q3UAF6;Q3U939;Q3UAA9;Q3UA89;Q3U5R4;Q61276;Q3UCF8;Q3U804;Q3UGS0;E9Q1F2;E9Q5F4;G3UZ07	Q5M9J2;Q9D0S9	Q7TQK5;E9QAD4;Q8BUE0;Q8BWK1	E9Q3M3;Q6NZM3;O08788;O08788-2	E9Q1Q9;P97328;Q9CPP1;D3YVB6	A1L0U3;B9EI85;P84228;A1L0V4;P68433;F8WI35	Q9QZH3	O35852;Q3UZW2;O35417	Q9DBQ7;Q9DBQ7-3	Q3V169;A2N6K9;E9Q046;O35706;L7N265;D3Z452;Q62183;E9Q2X0;Q99206;Q8C5S9;Q80YU2;Q80W76;Q62184;O35703;E9PYJ0;B2RUN1;Q8C641	Q8VE19	Q9CZ62-2;Q9CZ62;Q8C1I9	F6TBV1;F6WHL0;A2ADH1;Q9CQY5-2;Q9CQY5-3;Q9CQY5		Q8BVG4;Q8BVG4-2	Q4FJQ6;Q3U3L3;Q60854;F8WIV2;K7E6F1;E9Q108;E9Q0P9	Q5U452;Q99PW4	Q64444;Q3U3I1;F6ST32	Q80XN0;D3Z2Y8	P70227	Q9QWR8	Q9ER72;Q3UXN3	Q3TD41;Q3UGF2;Q1AJD0;Q5SVQ0-4;Q5SVQ0-2;Q5SVQ0-3;Q5SVQ0	Q3TLP5;Q3TLP5-2;F6YTG0;Q3TLP5-3	Q8BH15-4;Q8BH15-3;Q8BH15;Q8BH15-2;Q8BH15-5	P11983;P11983-2	Q5XJY5;Q3U4S9;Q8R1S6;Q3TDU1;Q8C0G7	O88428;Q9QYS0	E9QL65;Q3USH9	Q3TD41;Q3UGF2;Q1AJD0;Q5SVQ0-4;Q5SVQ0-2;Q5SVQ0-3;Q5SVQ0	Q8BVG4;Q8BVG4-2	Q9D8C4	Q3U2Z6;Q3TDY6;O89023	E0CYJ0;E0CXA9;Q3UGM5;Q6PEB6;G8JL35
	E9Q1M6;E9PUR0;Q6KAP1	Q3TVW1;Q8R1X6;D3Z3F8;Q8R1X6-2	D3Z1H9;Q7TMS6;Q3U011;Q9JL62;D3Z1H8	Q9ER38	B2RQS1;Q9ERG2	Q3UWS9;Q3U7H9;P99029-2;P99029;G3UZJ4;H3BJQ7;Q9D6X2	Q3UGR5;Q3UGR5-2	Q3ZAW0;Q104P0;B7ZP48;O35659	Q8CAQ1;G3X9Q0;Q9JKP5;Q8CHF5	Q9JM76;H7BWZ3;D3Z2F7;D3Z2F8	Q3U8P8;Q3URU8;B1ASP2;P52332;Q8K0I7	P70704-2;A1L332;F6WYQ5;P70704-3;Q5DTG0;P70704;Q8CA15;Q52KQ7	P97384;D3Z7U0	Q32MU0;P63239	Q3UYP2;Q3TVT6;Q9CQF9;Q99JK4	Q9DD18;Q9DD18-2	B2RXY7;P48758	Q642K0;Q60605-2	Q9DAM7	Q543F6;P49615	Q548L6;P48318;D3Z1L8;Q8C6I7;D3Z5S3	B2RUS7;Q8BNE2;Q6PGE2;Q9Z2P1		Q91YP0	Q03517	Q64727	Q642K1;Q58EW0;P35980;Q0QEW9;G3UZJ6;G3UZK4	B2RRC5;A2AWA9	Q9EP69	Q0PD65;P53994;Q8BXY4;Q6PDZ3	Q8BGX2	Q9ER72;Q3UXN3	Q924L1-3;Q924L1-2;Q924L1	Q3TDA1;Q8BX94;Q571D2	Q6A0D1;Q9CRD2	Q3TUQ5;O35691;Q9CV89	Q80XD3;O54829;Q45FE4;Q45FE5;Q45FE1;Q45FE2;Q45FE3;A0A087WSH2;A0A087WQG6;A0A087WSJ9;A0A087WPW1;F6WDS8;A0A087WNZ9;A0A087WRP8;A0A087WPC4;A0A087WPD1;A0A087WRN0;Q9Z2H2	Q6ZQI3;D3Z1M3	Q9EQT6	Q91YP0	Q8VDG5;Q8VDG5-2	Q9D8C4	Q8CID3
	P62918;Q3UJS0;Q3THC7;Q9Z237	Q8C5B4	P97401	P06745;B7ZWL9	Q545I7;P01325	Q80XR5;P26369;Q505Q1;Q922I0;Q3KQM4	D3Z5I1;Q3UPF5-2;Q3UPF5;G3X9X5;Q8K302	Q3UA17;Q791V5;A2AFW6;Q9D050;Q05C68	B1B1A8;Q6PDN3;Q6PDN3-3;Q6PDN3-2	P11983;P11983-2	Q61687	Q496X5;Q3UW05;P10601	A2RSW6;Q8CFA2	B2RXR2;Q8VD65;B2RY05	Q8VCR2-2;Q8VCR2;A8Y5N4	Q8BK29;B1AT82;Q9D0M1;B1AT83;B1AT84	Q564E2;Q3TI99;P06151;Q3TCI7;Q3UDU4;G5E8N5;D3Z736;Q99K20;Q3THB4;D3YZQ9	Q3TM92;Q91W96;Q3TI31	Q8CJ40;Q8CJ40-3;Q8CJ40-2	Q8R1E1;E9QL80;Q6A0A4;Q3UZK0;Q91YX5;D3YVK0	Q9ERS2	O88325;O54752		E9Q7N5;Q8R2Q4-3;Q8R2Q4-2;Q8R2Q4;Q3TML3;Q3TSU6;Q8C1C2	Q03265;D3Z6F5	A2A5N2;Q9CQV8;A2A5N1	P27546-2;P27546;P27546-3;E9PZ43	Q8VDS8-3;Q8VDS8;Q8VDS8-2;D3YY98	Q924L1-3;Q924L1-2;Q924L1	Q8K3X4	Q8VEK0;D3YVV1	Q8CJ40;Q8CJ40-3;Q8CJ40-2	Q9QXN3-2;Q9QXN3;Q3UJV0;Q3UBZ2	Q8R0F3;E9Q265;E9Q0Z7	Q4VA29;Q9CQE8;J3QNB0	A0MNP4;Q9ERF3;Q8BVQ0;D6RDC7	P14152	Q3U0S1;Q8BZ20	D3YWD8;Q2VWQ2	E9Q1Q9;P97328;Q9CPP1;D3YVB6	Q9D1B9	A9E3L2;Q9Z2I2;Q80YE1;Q810R7	Q8BK29;B1AT82;Q9D0M1;B1AT83
	Q5XG69	Q3UTJ2	Q8C140;Q9QXX4;Q91YK1	P68181;P68181-2;P68181-3;P68181-4	P42128	Q3ULW0;P62827;Q14AA6	A2ACD2	B7ZP20	Q3ULG4;O35226-2;O35226-3;O35226-5	Q9DB34	Q8K4Z3	Q3ZAW0;Q104P0;B7ZP48;O35659	Q8BWT1;Q3UKH3	P10649;A2AE89	Q9JMA1;E9PYI8;Q80UN0;Q3TC32	Q9D3M4;Q91V77;Q9JL08;P56565	Q9D8C2	Q8K2Q0	Q9CQN7;F7CXS7	Q9ER72;Q3UXN3	B2RY22;A0A087WS18;J3QP81;A5D6Q8;A0A087WRK0;A0A087WQF1;E9Q6L0;A0A087WQ95;A0A087WNW8;A0A087WP42;E9QNY9;A0A087WRE8;E9QKH0;A0A087WQ31;Q80TV8-2;Q80TV8	Q8CG03;Q8BJ62		F6TBV1;F6WHL0;A2ADH1;Q9CQY5-2;Q9CQY5-3;Q9CQY5	Q3THA6;Q8BL97-3;Q8BL97-4;Q8BL97-2;Q8BL97	P27546-2;P27546;P27546-3;E9PZ43	Q3TF41;Q8BSH9;P28656;E9PW66	Q544E8;Q9JKM7;Q8BQX0	Q5SRX1;Q5SRX1-2;Q5SRX1-3;Q5SRX1-4;Q5SXA5;Q5SXA4;Q5SRX1-5	Q8BH15-4;Q8BH15-3;Q8BH15;Q8BH15-2;Q8BH15-5	P10649;A2AE89	Q8VEK0;D3YVV1	D3YXJ5	Q3UEQ1;D3YTM1;E9Q9A0;D3YUD3;D3YUL8;D3Z230	Q61249	Q3UKT3;Q3TG75;P29758;Q3UJK5	Q6ZWQ6;P61087;Q3TL77;D3Z4U3	E9Q1V9;E9Q1T1;Q8C8X9	Q543F6;P49615	E9Q9J4;Q6ZQB6-3;Q6ZQB6;Q6ZQB6-2;Q80V47	Q543Q4;P35276;Q8BP17	Q3V169;A2N6K9;E9Q046;O35706;L7N265;D3Z452;Q62183;E9Q2X0;Q99206;Q8C5S9;Q80YU2;Q80W76;Q62184;O35703;E9PYJ0;B2RUN1;Q8C641	P12849;Q921L9;Q3TY04;D3Z0V6
	Q3TFP0;Q3UDH7;Q3UA07;Q3UYX6;Q9R0U0-3;Q9R0U0-2;Q9R0U0	P59266	Q9ER38	Q9QUP5	A2RRK3;O54988-2	Q8BTS0;Q61656;Q5U222;Q3V0Z8;A1L333;Q3UXW3;S4R1I6	Q544R7;Q3U6W4;O70252;D3YX62	Q7TPT3;Q542L0;Q3TIP4;Q69ZS4;A2AAN0;Q3USE0;O35250-2;O35250	Q99JF8;A2BI12;Q99JF8-2;Q05CD2	Q52L55;Q9QYC3	Q6P5I3;P28474	Q4VA21;Q3TQM5;Q8BH16	Q99L27	Q8CIH9;Q3TUW2;Q3UGA8;Q3TKC5;Q3UGU3	Q3UJB0;Q3UAI4;Q80W39;Q3UBH2;Q3UQU5;Q8BL33	Q8R5C5;E0CZD4;E0CYB4	Q6ZPJ3	Q8BKE6;Q80Y48	Q6NSU3	A2AFI8;B9EI38;B1AV20;Q3UHF8;Q80XA6	F6TBV1;F6WHL0;A2ADH1;Q9CQY5-2;Q9CQY5-3;Q9CQY5	P70677;Q8BNT4		Q3UCY7;Q3TWN7;Q571E2;Q9R1Q9;Q3TT23;Q3THZ3;Q3UWN7;Q3TKX1	Q922H9;Q922H9-2	Q14AR0;Q9D8T7;F8WHU8;Q9D8T7-2	D3Z0F5;Q3UIT2;O88545	H3BKQ7;Q7TSA7;H3BJD0;Q3UUK5;H3BL28;Q7TN74;H3BJD6	D3Z7C0;Q3UKS6;Q9Z2Q5	Q8BVG4;Q8BVG4-2	Q9CZ62-2;Q9CZ62;Q8C1I9	Q14BZ3;P70202	B2RY22;A0A087WS18;J3QP81;A5D6Q8;A0A087WRK0;A0A087WQF1;E9Q6L0;A0A087WQ95;A0A087WNW8;A0A087WP42;E9QNY9;A0A087WRE8;E9QKH0;A0A087WQ31;Q80TV8-2;Q80TV8	Q52L66;Q91W67	Q91YR1	Q91YQ8;O09174;Q3TUS8	Q5BLJ7;P62301;Q921R2	E9Q035;P47758;Q542X6	Q9EP69	Q8VEK0;D3YVV1	Q3ULN8;Q6PD03	B2RY22;A0A087WS18;J3QP81;A5D6Q8;A0A087WRK0;A0A087WQF1;E9Q6L0;A0A087WQ95;A0A087WNW8;A0A087WP42;E9QNY9;A0A087WRE8;E9QKH0;A0A087WQ31;Q80TV8-2;Q80TV8	Q3U6D7;O55100-2;O55100
	B1AX98;E9PV22;Q505F5	Q9Z130	Q8BSI9;Q3UIC2;P15116;D3YYT0	Q99K30;Q99K30-2	P43274	B2CY77;P14206	Q9CQ65	B2RPS1;Q0PD56;P61021;Q8C458	B2RTM0;P62806	Q3UZ58;Q61578	Q7TMK6;Q3UWV9;Q3TKK8	Q544R7;Q3U6W4;O70252;D3YX62	Q9CQF0	Q3TBG7;P21570	P55937-1;P55937	Q4FJN2;Q64378;Q3TX72;B8JJC2	Q8VBT9;Q8VBT9-3;Q8VBT9-2	I7HPW8;F6YB52	Q5SSZ5;Q5SSZ5-2	P23475	B2RY27;Q8BYC6;Q3V3K3	B2RY27;Q8BYC6;Q3V3K3		Q8R0Q6;Q3UHG5;Q6PDN6;Q62283	Q3UUF0;Q8C541;O08914;Q8BRM1	E0CXN5;P13707	Q91ZP9;Q3B7X9;Q3B7Y0;Q91ZP9-2;D3Z103	Q8K2I1;D3YWJ4	Q9EQT6	Q3TMB8;P54822;E9Q242;E9Q3T7	B2RXC1	Q9CZ62-2;Q9CZ62;Q8C1I9	Q9CRB9;Q91VG6	Q3ULN8;Q6PD03	Q3U931;Q542W3;Q3U541;P97379-2;P97379;Q3U6B1	G3X9L6;Q9DCX2;B1ASE2	Q9D031;Q01730;Q3TFN7;A2AUR7;Q9CSE4;Q9CUS2	Q5NTY0;Q3TK61;P63037;B1AXY1;B1AXY0	Q3U2Z6;Q3TDY6;O89023	Q9D8C4	Q9DB15	Q14BZ3;P70202	A0A087WS27;D3Z5S8
	Q8BFW7;Q8BFW7-4;Q8BFW7-5	Q3UHL7;E9QN70;B9EKB0;P02469;Q9CRX6;Q8K271	Q99K30;Q99K30-2	B1AU74;Q9CWP6-2;Q9CWP6-3;Q9CWP6;Q3U0U1;Q9CWP6-4	Q9WVJ3-2;Q9WVJ3;Q3U496	B2RUD2;Q811S7-2;Q811S7	Q7TPT3;Q542L0;Q3TIP4;Q69ZS4;A2AAN0;Q3USE0;O35250-2;O35250	Q9CQ65	Q3V214;Q80UW8;Q8R0H0	Q8VDM1;F7C2Y9	Q3UUH0;Q91YI0;E0CXM2;E0CY49	Q9CPS6;F8WH96	Q80X32	Q99J83	Q9JJV2-3;Q9JJV2;D3YWS3;Q9JJV2-2	Q8VDP4	Q7TQD5;Q3UGT1;P97742;A8ASF5	O70494-3;Q2M4I5;O70494-2;O70494	Q3UC67;Q8JZR0;Q3UKS0	Q3TDA7;Q9WVE8;Q3UP40	O88325;O54752	Q9ERS2		Q4VA93;P20444	Q8BK67	Q6ZWQ6;P61087;Q3TL77;D3Z4U3	Q9Z315	B2RX15;Q6ZPS6	Q9DAU1;Q9DAU1-2	Q9DB73;G3UZG6;Q9DB73-2	Q9DB15	Q8BGX2	Q8BGX2	Q9JJH1	Q91VM5	P55937-1;P55937	Q4FZL1;Q5F2A7;P60843;Q3UXC2;Q3TGK7;Q3TFG3;Q3TLL6;Q3U8I0;Q78WR5	Q3UD67;Q8BGQ7;Q6XMP4	Q9CR39;F7AZP7	Q9CRB9;Q91VG6	Q4VAE8;Q9CQC7;Q9DBH2	Q3TMB8;P54822;E9Q242;E9Q3T7	Q3ULB1;Q921W7;P47226-2;P47226
	Q8K232;Q9QYC0;F8WHZ9;F8WGR0;Q9QYC0-2;E9Q1K3	Q80XD3;O54829;Q45FE4;Q45FE5;Q45FE1;Q45FE2;Q45FE3;A0A087WSH2;A0A087WQG6;A0A087WSJ9;A0A087WPW1;F6WDS8;A0A087WNZ9;A0A087WRP8;A0A087WPC4;A0A087WPD1;A0A087WRN0;Q9Z2H2	P10649;A2AE89	P10649;A2AE89	Q8BTW2;Q3U8X1;Q9DCH4;Q6IRT4;Q3UVY8	E9PX68;Q5BKS1;O54716;E9Q585;Q3UHY0;E9Q1Q0;Q3UUI2;Q6GQW1	Q3UHI4;B9EKE7	Q31093;Q7YPG8;Q7YPD1;Q0WXH3;Q31166;Q8MHM0	Q71LX8;P11499	Q99M31;Q99M31-2	Q3UGS9;Q3URM1;Q3U3U6;Q8CCN6;Q60649;Q3TXD4;E9PY58	Q3TNH0;Q61029-3;Q61029-2;Q61033-2	I1E4X7;Q9JI46;H3BLR8;B2KF67	D3Z7E5;Q2NL51	Q8BK72;Q80ZI4	Q8QZZ7;G3X9K8;D3Z5E8;Q8R2M6	P70460	O08579;Q3THM8;I7HJS1;B7FAU5	Q9ER72;Q3UXN3	V9GXE6;I6L9E0;Q3U3J6;A2ALA6;P09925	Q9D1B9	Q9ER72;Q3UXN3		Q8R3N6;Q3UTN0	Q8BTJ1;Q543K5;Q3ULZ3;Q99K85;Q3U6K9	Q64444;Q3U3I1;F6ST32	Q8BN32;P29341;Q3U8U8;Q99KL3	Q6ZQ38;Q3UMI9	Q3U2Z6;Q3TDY6;O89023	Q6ZWQ5;Q3TGS7;Q3V2H3;Q99M52;O70493	Q9CXS4	Q8R3N6;Q3UTN0	Q9CXS4	Q64685;Q9JJM6	Q5BLK0;P35979;Q8C2K0;Q3TIQ2	A2A5N2;Q9CQV8;A2A5N1	Q3UXG7;A2AMC3;Q91ZW2	Q9EPK6	Q5SSZ5;Q5SSZ5-2	Q8CJ40;Q8CJ40-3;Q8CJ40-2	Q3UYC0;Q3UYC0-2	D3YWK1;Q80W47	Q9JMA1;E9PYI8;Q80UN0;Q3TC32
	Q3TT51;P12961	Q60951;Q3UBT1;P62960;Q71V06;Q810K5;Q60950	P68181;P68181-2;P68181-3;P68181-4	Q8BSI9;Q3UIC2;P15116;D3YYT0	Q8C6B0;Q5K4Q9;Q1XG79;Q9D7S5;Q76I24;Q5I0W6	E9Q3I8;E9Q3I9;E9Q3I4;E9Q3I5;E9Q0N0;Q9Z0R4-2;Q9Z0R4;Q3TUF4	Q3ZAW0;Q104P0;B7ZP48;O35659	G3X9G4;Q3TCR7;Q3TBU6;Q9CUM4	P62918;Q3UJS0;Q3THC7;Q9Z237	Q3UXP2;Q3TXT7;Q9WTM5	Q3TAJ6;P58854;Q3TN67;Q80U29	D3Z3N4;D3YWT1	Q4V9X9;Q5M9M5;P62751;Q91YK6	Q544B1;Q3UJW1;Q3U9J7;Q3TVM2;P47738;Q3U6I3	Q541E2;Q3TWM2;P51855;Q8R436	D3Z6G3;D3YUY6	Q8BTU4;Q564E6;Q3TG93;P32067;Q9CYB9	P62204;Q3UKW2;Q9D6P8	Q5SRX1;Q5SRX1-2;Q5SRX1-3;Q5SRX1-4;Q5SXA5;Q5SXA4;Q5SRX1-5	A2AW05;Q05DR5;Q08943;Q08943-2	B2RRX2;P63328-2;P63328;Q4V9X0	Q548L6;P48318;D3Z1L8;Q8C6I7;D3Z5S3		Q3ULN8;Q6PD03	Q9D2U9;Q8CGP0	Q9JKF6	Q9ES28-4;Q9ES28-2;Q9ES28-7;Q9ES28;Q9ES28-3;Q9ES28-6;Q9ES28-5	Q3V3U0;Q3UYH9;Q3TFQ8;Q8CI94;Q3UGT5;Q3UZL2	Q8CIH9;Q3TUW2;Q3UGA8;Q3TKC5;Q3UGU3	P10649;A2AE89	Q8K3X4	A9E3L2;Q9Z2I2;Q80YE1;Q810R7	Q8R1K4;Q8R1K4-2;F8WHK6;Q8R1K4-3	Q0P6I6	B7ZN44;A5CVE4;I1E4X8;B2RQE3;P83093;Q8BIM2;F6WBP9	Q5BLJ7;P62301;Q921R2	G3X9L6;Q9DCX2;B1ASE2	Q9DBL7	B2RWX4;Q8BZ36-2;Q8BZ36	Q99J83	B2RXC1	Q0PD65;P53994;Q8BXY4;Q6PDZ3	Q3TDD9
	Q569Y6;Q9CZY3;B7ZBY7;E9PY39;Q9CZY3-2	P51174	P06745;B7ZWL9	D3YU12;Q8K2T1;G5E8S7;Q8K2T1-2	Q9CU62;A0JLM6	A0A087WQY7;A2AMZ4	G3X9G4;Q3TCR7;Q3TBU6;Q9CUM4	Q8C7K6	Q3UW40;Q8BP67;Q8BT08;Q9CS31	Q8VDM6-2;Q8VDM6	A2AJ23;Q925Q2;Q64322;A2AJ20;Q8CFL4;A2AJ21	A2ARP8;Q9QYR6;Q9QYR6-2	Q3TPZ5;Q99KJ8	E9PZ00;Q3TXJ0;Q8BFQ1;Q3U8C4;Q3TXP9;Q3TWL8;Q3TWM9;Q3UAS4;Q3U897;Q3U825;Q3U5W2;Q3TWF9;Q3TKB2;Q3TIT5;Q3TID4;K3W4L3;B2RUD7;Q3UFE8;J3QPG5;Q61207;Q3TKK3;Q3UE29	Q3TGH8;O88811;O88811-2	Q6PDC2;Q9CZL0;Q3TFU8;Q99KF1;Q3U7N8;Q8BLM5	Q9ERB0	O35153;I6L979	Q5U458;E9Q8B3	Q3UL64;O35657	P23475	Q9ER58;F6SLR4;Q80U51;Q6PAN0		Q3UEQ1;D3YTM1;E9Q9A0;D3YUD3;D3YUL8;D3Z230	B9EKJ7;P58871;Z4YJL4	D3Z0F5;Q3UIT2;O88545	P97300;P97300-1;H3BIX4;Z4YLB7;P97300-3	Q6P5D8	D3YX15;Q61153;D6RDQ6	Q9ESR1;Q540E6;Q921J2	Q9ESR1;Q540E6;Q921J2	Q9ESR1;Q540E6;Q921J2	Q71FD5	Q922A2;Q3TJ49;Q07076;Q3UYL7;Q8BP75;Q8CCV9	Q9Z2E1	Q3UXG7;A2AMC3;Q91ZW2	P70460	Q3UQB4;A2BFB1;Q8K0H8;A2BFB0;O08609-3;O08609;A2BFB2;O08609-2	Q9Z2C9;G3V027;I6L9A6;G3UYB7;G3UYZ2	A2AKH7;Q8JZX5;Q9CSK4;Q9D1G5	Q60902-4;Q60902-2;Q60902;Q60902-3	Q9DB15	Q5M9L7;Q8BT90;P63276;Q3TK12
	E9Q5D6;P69566;P69566-2	Q8K232;Q9QYC0;F8WHZ9;F8WGR0;Q9QYC0-2;E9Q1K3	Q9JHC0	Q9JHC0	Q04447	P46471;Q3UIH5;Q8BVQ9;Q3U5V3	Q9D927	Q3UCD9;Q3U7P0;Q3TWR6;Q3TWD0;P18242;Q3U8W5;Q3U651;Q3TJN3;Q8C243;Q3TWL1;Q3U7I9;Q3UCW4;Q3TXL5;Q3UC89;Q3TIR0;Q3UAQ1;Q8VCK2;F8WIR1	Q542M2;P61924;Q8R3M1	Q8BGR9	Q31093;Q7YPG8;Q7YPD1;Q0WXH3;Q31166;Q8MHM0	Q9CZS7;Q544E3;O70172;F6RJE8	Q8C5H8-2;Q8C5H8-3;Q8C5H8;Q14BL1;Z4YK42;Q8C5H8-4;Q9CUB4	I6L970;Q3TBX5;Q3U3K9;P70295;Q3TAZ9	Q9EQ20;Q8K0L1	Q8R105;Q8R105-2	Q5SUR0	Q5BKS5;Q8BUK6;Q3UUZ6	Q571M4;Q8VC28	P97467;F8VQA4;E9Q704;Q3V1A8	Q91WD5;D3YXT0;F6RJ83	B2RY22;A0A087WS18;J3QP81;A5D6Q8;A0A087WRK0;A0A087WQF1;E9Q6L0;A0A087WQ95;A0A087WNW8;A0A087WP42;E9QNY9;A0A087WRE8;E9QKH0;A0A087WQ31;Q80TV8-2;Q80TV8		D3Z6J0;Q6SKR2;Q6PRU9;Q4KMV5;E9PXT7	Q0VF62;B1AR74;Q8CCN5;Q3TAC0;Q8CCN5-2;F7C0F2	V9GXH3;V9GXF0;V9GXP8;F8VPM7;Q99MI1;V9GWT6;Q99MI1-2;V9GX53;Q99MI1-4	Q9JKF6	Q99LL5;E9QAL6;Q9CTC0;Q9CSK2;Q8BW04	P47857;Q99K08;P47857-2;P47857-3	P56376;Q4VAF0;E9QJT5	Q14BZ3;P70202	Q8K3X4	Q9JKN1	A2AFI8;B9EI38;B1AV20;Q3UHF8;Q80XA6	P18608;D3Z607;Q8CEW1	Q642K1;Q58EW0;P35980;Q0QEW9;G3UZJ6;G3UZK4	Q9D2U9;Q8CGP0	Q8C129;Q3TTA8;Q8BZ14	Q924L1-3;Q924L1-2;Q924L1	Q8K131	A9E3L2;Q9Z2I2;Q80YE1;Q810R7	Q3UYC0;Q3UYC0-2	Q544H0;Q9Z1D1;Q3THA0
	Q3UHW2;Q3TT11;P51660	B1AX98;E9PV22;Q505F5	Q5I012-3;J3QNE8;Q5I012;Q99JV6;Q7TMR2	Q8CBY0	Q3TJ01;Q99LF4	Q8VE22;F7ARZ1;Q3TI14;Q3THH3;Q99LZ4;Q5SXC9;A7M7Q8	P11352	Q50HX4;Q50HX2;Q91V41;Q50HX0;Q50HX3;Q50HX1;A2AL34;Q50HW9	Q3TIC8;Q9CZ13;Q3THM1;Q8K2S8	P16254;A2AUM6	P48036	Q8VCT0;Q3U8R7;P35951;Q3TVR4;Q3TDD1;Q91ZJ1	Q8C5R8;Q32M04;Q9CVZ1	Q9JM62;Q9JM62-2	E9PUC4;Q6NSW3-2;Q6NSW3;Q6NSW3-3;Q6NSW3-4	Q5M9P7;Q9CR86;Q3UD53;Q3U434	E9QQ99;D3Z1Y1;Q9DBY1;D3YZH4;Q9DBY1-2	Q8R0H9;Q3TB03	Q3UQE2;P56386	B2RS41;Q8BWF0	B2RXC1	Q544B1;Q3UJW1;Q3U9J7;Q3TVM2;P47738;Q3U6I3		Q0PD65;P53994;Q8BXY4;Q6PDZ3	Q80Y09	Q91ZP9;Q3B7X9;Q3B7Y0;Q91ZP9-2;D3Z103	Q14AR0;Q9D8T7;F8WHU8;Q9D8T7-2	Q8CCJ3;Q8CCJ3-1	Q9ER72;Q3UXN3	Q3UYC0;Q3UYC0-2	Q9D1H8	Q9DAU1;Q9DAU1-2		Q542R8;O70443;Q3UYF9	Q4VBX4;Q9D2M8;A6X925;Q9D2M8-2	Q9DB77	Q14B01;Q9D7A3	Q80UI9;Q3TDI2;P56695;Q3UN10	Q4QQP1;Q9CZG3	D3Z7C0;Q3UKS6;Q9Z2Q5	Q9JKN1	D3Z1H9;Q7TMS6;Q3U011;Q9JL62;D3Z1H8	Q8BMA6;A2AAN2;Q8K258
	Q3UTJ2	Q9EPU0-2;Q9EPU0	Q99K86;Q9R069;Q8BGB4	Q149D1;Q8BH55	B9EHZ5;Q9JLB0-2;Q3UN60;Q9JLB0;Q6NSS8;Q811G2	P62996;F8WJG3;Q5PR75	B7ZP20	Q543N6;P58389;Q8C0E1;A2AWE9;A2AWF0	Q80VD1	Q9D1H6;A2AJX3	Q0VG22;Q9JMD3;Q52LA1;E9PVP0;Q5RL65;Q6PDD6;Q66JR2;G3UYM0;G3UY59;G3UW37;G3UY87;G3V020	Q5DTS4;S4R1W5;Q8R388;O88720;Q3ULB0	Q3U9X3;Q91WE2;Q05CB0	Q496X5;Q3UW05;P10601	Q6ZQ47;Q3UYC8;A2BDX0;Q5BL11;Q5RKY4;Q9Z103	Q3UIA1;P19426-2;P19426;G3UY39	Q547R0;E9QAT0;Q6AXB7;P35922-3;P35922-2;P35922;D3Z6U8;E9QNF5;E9QAS8;P35922-9;P35922-8;P35922-7;E9QAS9;P35922-5;P35922-4;P35922-6;P35922-11;P35922-10;P35922-12;Q8BPK8	Q3UVL4;Q3UVL4-2	F6TBV1;F6WHL0;A2ADH1;Q9CQY5-2;Q9CQY5-3;Q9CQY5	Q3THU8;Q8VEM8;G5E902;Q3UB63;Q3U995	B2RUS7;Q8BNE2;Q6PGE2;Q9Z2P1	B2RRX2;P63328-2;P63328;Q4V9X0		Q8R395	Q8K209	Q8BTX9	Q8BTX9	Q3UJC3;O70310	Q9R0M7;Q91X42	Q9D4H1;Q8K2J3	E9PZ00;Q3TXJ0;Q8BFQ1;Q3U8C4;Q3TXP9;Q3TWL8;Q3TWM9;Q3UAS4;Q3U897;Q3U825;Q3U5W2;Q3TWF9;Q3TKB2;Q3TIT5;Q3TID4;K3W4L3;B2RUD7;Q3UFE8;J3QPG5;Q61207;Q3TKK3;Q3UE29	D3YUP1;Q9WVG6-2;Q9WVG6		A2VCS7;E9PWM3	Q99K28;Q99K28-2	P14152	P61965;Q3UNQ3;F6Q3W0	Q4FK57;Q8R180;Q4FJZ3	D3YX15;Q61153;D6RDQ6	P17156;B7U582	Q99J83	Q60902-4;Q60902-2;Q60902;Q60902-3	B2RSW8;Q9R0L6;Q9R0L6-2
	D3Z4U5;D3Z555;G3UYZ9;Q8BVL9	D3Z4U5;D3Z555;G3UYZ9;Q8BVL9	Q8BVL3	Q8BK48	A3KMF2;Q5DTZ3;G3X8R8;P59759	P09411;S4R2M7	P68404-2;P68404	Q9DD05;P10518;Q8VCZ1;O89061	Q8C605;Q9WUA3;Q9WUA3-2	Q8CIN4	Q7TN29;Q7TN29-2	P15105	Q3TDN8;Q8R164	Q60520;Q60520-1	P17751;H7BXC3	P47963;Q5RKP3	F8VQJ3;P02468	Q9JKB1;Q8BWQ9	Q3UYC0;Q3UYC0-2	B7ZMT9;B9EHC3;Q9JME2	Q9DCV4;A2AGJ2	Q9DCV4;A2AGJ2		B2RXC1	P18608;D3Z607;Q8CEW1	Q91VH6;Q3TWT2	Q91VH6;Q3TWT2	V9GX40;V9GXD9;Q5SV85;Q5SV85-2	Q0PD65;P53994;Q8BXY4;Q6PDZ3	P36916;A2VDH5;Q52KE3;P36916-2	Q8R3N6;Q3UTN0	B2RXC1		Q0PD65;P53994;Q8BXY4;Q6PDZ3	Q76MZ3;Q8C2E1;Q7TMX2	Q9D2U9;Q8CGP0	A2A5N2;Q9CQV8;A2A5N1	Q3UDC8;P58252;Q8BMA8;Q3UZ14;Q3UMI7;Q3TX47;Q3TK17;Q6P9L9;Q3TWX1;Q3TLB1;Q3TJZ1;Q8C153;Q3UBL9;Q3TW58	Q7TQ39	Q8C140;Q9QXX4;Q91YK1	Q14BZ3;P70202	O08847;P08775	Q99PB4;Q9ER67;Q3TFU3;A2AG46;A2AG48
	Q7TT04;Q3UJY4;P59235;Q3URN3	Q5EBQ0	Q149D1;Q8BH55	Q545H3;Q3UBR8;Q9Z0V7;A2AES1	Q3U8D2;Q99L47;Q3U9V1;Q3U3N7;F8WJK8;Q3TGW8	Q3UII2;P40237;A2AIJ1	Q8R3I2-2;Q8R3I2;Q8R3I2-3	Q52L66;Q91W67	Q7TNV0;Q3U4W4;E9Q8Y1;D3YVJ6;Q9CVL7	Q91WM2	Q8C4G3;Q8C288;Q505G9;A2AQC3;Q6DI68;O70228	Q3U8P8;Q3URU8;B1ASP2;P52332;Q8K0I7	Q9D881;P19536	D3Z5I1;Q3UPF5-2;Q3UPF5;G3X9X5;Q8K302	Q3TGB1;Q9CQ26;Q5DTH9	E9QQ10;Q99P24;Q9CVC1;Q8BV41;Q9CS73;Q8C0C6;H3BLL7	Q5BLK0;P35979;Q8C2K0;Q3TIQ2	Q8BP60;Q99JX7;V9GXF3;V9GXW3	Q8CIH9;Q3TUW2;Q3UGA8;Q3TKC5;Q3UGU3	Q8K3X4	Q8R121;Q8R121-2	Q8C6F3;G5E897		Q91YT8	Q8K370;Q9CRH8	Q642K1;Q58EW0;P35980;Q0QEW9;G3UZJ6;G3UZK4	Q69ZW3-2;Q69ZW3	Q6P6M7;Q3U597	Q5MJS3	Q543M3;Q3UHZ4;Q3U5U9;Q3TT75;P06797;Q3UWH6;Q9D0C0;Q3TVJ1;Q3TNC8	B2RUS7;Q8BNE2;Q6PGE2;Q9Z2P1	B2RUS7;Q8BNE2;Q6PGE2;Q9Z2P1		Q3V384;F6VT60	P50518	Q14B01;Q9D7A3	Q922F6	Q8BHI7;D3Z0Z6;D3Z136	Q9D0A3	Q8CBY0	Q544B1;Q3UJW1;Q3U9J7;Q3TVM2;P47738;Q3U6I3	Q9QWR8	Q8BP47
	Q3UUF0;Q8C541;O08914;Q8BRM1	Q7TT04;Q3UJY4;P59235;Q3URN3	P27046	D3YYW8;Q91V81;Q91V81-2	Q3TVS6;P10605;Q3TC17;Q6LAF6	P11983;P11983-2	Q542C3;P59114	Q8K1J6;Q8K1J6-2	Q8CBE6;Q8BPJ7;Q544G5;Q62165;D9IFT4	P62137;Q3U8W0;Q3TYF5	Q542R8;O70443;Q3UYF9	Q9D020-1;Q9D020	Q8C297;Q9CQN6	Q544U7;Q9ERI2	Q3TIC8;Q9CZ13;Q3THM1;Q8K2S8	Q9D7P6;D3Z7W0;D3Z0K9	Q8C4Q6;Q8C4Q6-2	A0AUN0;Q4G0C0;G3X928	Q8VDG5;Q8VDG5-2	Q8C0W0	Q9ER72;Q3UXN3	Q8VCT0;Q3U8R7;P35951;Q3TVR4;Q3TDD1;Q91ZJ1		Q62426	P62918;Q3UJS0;Q3THC7;Q9Z237	Q9ES28-4;Q9ES28-2;Q9ES28-7;Q9ES28;Q9ES28-3;Q9ES28-6;Q9ES28-5	Q8VDM1;F7C2Y9	S4R1L5;S4R2P8;O88738-3;O88738-2;O88738	Q9Z2C9;G3V027;I6L9A6;G3UYB7;G3UYZ2	A2AW05;Q05DR5;Q08943;Q08943-2	A9E3L2;Q9Z2I2;Q80YE1;Q810R7	Q9DB15		Q99K86;Q9R069;Q8BGB4	A3KMF2;Q5DTZ3;G3X8R8;P59759	Q9CQX2;Q3TN44;Q3TH64	Q9JJE1;Q3U3F4;Q3TMJ8;P31938;Q3UK05;Q3TMW4	A2AEM2;Q99LI2	P47857;Q99K08;P47857-2;P47857-3	Q64521;A2AQR0	Q3V169;A2N6K9;E9Q046;O35706;L7N265;D3Z452;Q62183;E9Q2X0;Q99206;Q8C5S9;Q80YU2;Q80W76;Q62184;O35703;E9PYJ0;B2RUN1;Q8C641	E9Q1Q9;P97328;Q9CPP1;D3YVB6	Q9QXW9
	Q78ZM0;O70492;D3Z789;Q9CU14;Q9CSC2;D3Z6Z0	Q5XG69	Q543R4;Q00493	Q64442	P22682;Q2M4H7	Q3UXP2;Q3TXT7;Q9WTM5	Q3UCD9;Q3U7P0;Q3TWR6;Q3TWD0;P18242;Q3U8W5;Q3U651;Q3TJN3;Q8C243;Q3TWL1;Q3U7I9;Q3UCW4;Q3TXL5;Q3UC89;Q3TIR0;Q3UAQ1;Q8VCK2;F8WIR1	P17156;B7U582	Q921W4;D3YZD6;D3Z6I4;Q921W4-2;D3YU21;F7BGV1	Q3THG9;A2A4P3;A2A4P4	Q9QXD6	A2ASR7;A2ASR8;Q3ULL2;Q2LC58;P25916	Q99JB5;Q9CPS5;Q8BKP5;Q3TW90;Q9CX56;Q3TVY0;Q3TG45;Q3TI95;Q3U617	Q922A2;Q3TJ49;Q07076;Q3UYL7;Q8BP75;Q8CCV9	E9Q1G8;Q8C2A3;E9Q9F5;O55131;Q3UNN1;Q5DTS3	P28740-2;E0CZ72;P28740;P28740-1	Q80TT9;Q8CAL6;Q543P6;A2AVR6;Q8VHQ9	Q3UAP1;Q9WUQ2;D3Z3S1	Q9D0A3	Q9CQU0	Q9ER58;F6SLR4;Q80U51;Q6PAN0	P26339;Q3UN28		Q8BU25	Q3TCW5;Q99J45;D3YUV1	Q3UKT3;Q3TG75;P29758;Q3UJK5	Q6ZWQ6;P61087;Q3TL77;D3Z4U3	Q91Z50;Q8R069;Q8C952;Q3TGH6;Q8C5X6;Q99M86;P39749	D6RI47;D3YWI4;E9Q1I6;F8WHT5;G3UVW1;P19258	Q4VBC9;O09111	Q9DAU1;Q9DAU1-2	Q3TMB8;P54822;E9Q242;E9Q3T7		Q8R1E1;E9QL80;Q6A0A4;Q3UZK0;Q91YX5;D3YVK0	Q9JJE1;Q3U3F4;Q3TMJ8;P31938;Q3UK05;Q3TMW4	Q3THG9;A2A4P3;A2A4P4	Q3UKT3;Q3TG75;P29758;Q3UJK5	A3KGQ6;Q9D898	D3Z1H9;Q7TMS6;Q3U011;Q9JL62;D3Z1H8	P10649;A2AE89	O08847;P08775	Q9D1B9	Q6PDC2;Q9CZL0;Q3TFU8;Q99KF1;Q3U7N8;Q8BLM5
	Q5BLK0;P35979;Q8C2K0;Q3TIQ2	E9Q1M6;E9PUR0;Q6KAP1	Q545H3;Q3UBR8;Q9Z0V7;A2AES1	D3Z079;Q8K400;D3Z2Q2;Q8K400-2	Q8K370;Q9CRH8	Q3UC10;Q3ULG5;Q542I2;P97311	Q69ZZ8;G5E8Q8	Q3UHI4;B9EKE7	P57722;P57722-2;E9Q7D8;Q8CFQ6	Q3U0V1	P15626;D3YX76	F8VQ95;Q6Y685;Q6Y685-2	Q91YR1	A6H5Z3;A6H5Z3-2;Q6PCN5	Q5SU48;Q7TN98-4;Q7TN98-5;Q7TN98-3;Q7TN98-2;Q7TN98;Q5SU47;Q9D5G2;Q9D5F3;F6T0J8;A1A562;D3YUJ4;E9Q5X2;E9Q969;Q812E0	D3YWX2;E9Q803;F6YTL8;Q9R0I7;Q3TMN3;Q3UTT5	Q99JY0	O89001	P47857;Q99K08;P47857-2;P47857-3	Q9ME04;Q7JCY6;P03911;W0TGY1;F1JVR2;A9UIX0;Q3UQ59;A0A075DCI1	Q8C6F3;G5E897	B2RXC1		Q8CIH9;Q3TUW2;Q3UGA8;Q3TKC5;Q3UGU3	Q5NC81;P15532;Q5NC80	P97300;P97300-1;H3BIX4;Z4YLB7;P97300-3	Q91WM1-2;Q91WM1;Q8C5B7	Q3U706;Q91XC8;A0A087WR57	Q3TMH2	Q9EPK2-4	Q8CJ40;Q8CJ40-3;Q8CJ40-2	Q9QWR8		Q91YT8	Q5F239;P62254;D6RES1	P70460	A0MNP4;Q9ERF3;Q8BVQ0;D6RDC7	O70404	Q571E4;Q8CC47	O08847;P08775	Q9D1H8	Q544B1;Q3UJW1;Q3U9J7;Q3TVM2;P47738;Q3U6I3	P52875
	P62814	Q9CXW3	Q64332	Q32MU0;P63239	P61922;Q3V1S0;P61922-2	Q3U9X2;Q9ES84;O35901;O35900;Q9EP83	Q50HX4;Q50HX2;Q91V41;Q50HX0;Q50HX3;Q50HX1;A2AL34;Q50HW9	Q4FJQ0;P51150	Q3UID0;Q6PDG5-2;Q6PDG5	Q7TND9;P53395	Q64521;A2AQR0	D3Z7M5;Q9CPT5	E9Q983;Q8K4L2;E9Q3Z5;Q8K4L3;E3VVQ8	Q3UA17;Q791V5;A2AFW6;Q9D050;Q05C68	Q9CRA5;Q3UWP6;Q3TIL4;Q05BZ0	Z4YJT3;Q6ZQ58;Q3UU34;Q6ZQ58-2;Q9D423	Q4KML7;Q3UL48;P26040;Q3UXR4;Q3TCP5;Q8CBU4	Q61687	Q4QQP1;Q9CZG3	Q3UA17;Q791V5;A2AFW6;Q9D050;Q05C68	B2RX64;Q571E5;B7ZWH8	Q9D1B9		P26339;Q3UN28	Q80XL6;D3YTQ5	Q9CY58;Q3UJK2;Q9CY58-2;Q3UMP4;Q3UEI6;Q9CY58-3;Q3V274;Q9CY58-4	A2A5N2;Q9CQV8;A2A5N1	Q8BNZ1;O35623	Q4QQP1;Q9CZG3	D3YXJ5	Q9QWR8	Q9CXS4		Q8VEK0;D3YVV1	Q8R238;D3Z0F6	Q9R1K9;Z4YJH1;B1AUQ7	Q3TLI6	Q6QD59;B8JJI4;F7C279	Q8VD75	E9PZ00;Q3TXJ0;Q8BFQ1;Q3U8C4;Q3TXP9;Q3TWL8;Q3TWM9;Q3UAS4;Q3U897;Q3U825;Q3U5W2;Q3TWF9;Q3TKB2;Q3TIT5;Q3TID4;K3W4L3;B2RUD7;Q3UFE8;J3QPG5;Q61207;Q3TKK3;Q3UE29	Q3TMB8;P54822;E9Q242;E9Q3T7	P10649;A2AE89	O54692
	Q3UI46;P29595;Q3TY05	Q99KG3-2	Q9D8V0;Q9D8V0-3	Q3UUQ7	A0JNY3;Q8BUV3	P99026	Q31093;Q7YPG8;Q7YPD1;Q0WXH3;Q31166;Q8MHM0	K3W4P9;Q8CFE3	B9EKE9;Q3TQX5;Q62167;B7ZWF1;B9EIA2;P16381	Q80UG5;A2A6U3;Q80UG5-3	B7ZP20	Q9QXY6;Q8R0V6	O89032-2;O89032;O89032-3	Q3V384;F6VT60	Q5M9N5;Q5M9J8;P41105	O54941;C0IMX3;C0IMX0;C0IMX1	Q80T06;Q91VK2;P57776;E9QN08;D3YY68;D3YUQ9;D3YZT9	Q9JMC3;Q8R1X2	Q561M4;Q3UDC3;O88746	Q3V384;F6VT60	Q544B1;Q3UJW1;Q3U9J7;Q3TVM2;P47738;Q3U6I3	B2RX64;Q571E5;B7ZWH8		Q9EP52	B7ZCL8;Q542P4;P70290;Q684Q6;A2AN84;B7ZCL9	Q91WM1-2;Q91WM1;Q8C5B7	Q64727	Q9D5T0;Q9D9C1	D3YWT0;D3YTS1;Q9R0P6;D3Z569;Q6PET3	A2AFI8;B9EI38;B1AV20;Q3UHF8;Q80XA6	E9Q1S3;Q01405;Q8C1E4	P70677;Q8BNT4		Q8VDG5;Q8VDG5-2	Q3UWG5;P35762	P61965;Q3UNQ3;F6Q3W0	Q9CQX2;Q3TN44;Q3TH64	Q9D1H7;D3Z4J5;Q9D1H7-2	Q3TLP5;Q3TLP5-2;F6YTG0;Q3TLP5-3	Q99K86;Q9R069;Q8BGB4	Q0PD65;P53994;Q8BXY4;Q6PDZ3	Q99J83	Q4FK14;Q3UQ93;Q3ULV0;Q3UAT2;Q91V04;Q9CVJ6
	Q3U0S4;Q7TSG2	Q3U4W8;P56399	Q8BK48	Q99K86;Q9R069;Q8BGB4	Q9DBP5	A2APY7;A2APY7-2	B2RPS1;Q0PD56;P61021;Q8C458	Q9EQT6	Q3TJN2	B9EKE9;Q3TQX5;Q62167;B7ZWF1;B9EIA2;P16381	Q5D0A4;Q497P1;O35526;D6RFB9	A2AJ23;Q925Q2;Q64322;A2AJ20;Q8CFL4;A2AJ21	Q9JKN1	Q561M4;Q3UDC3;O88746	Q4VBX4;Q9D2M8;A6X925;Q9D2M8-2	Q8BGS2;Q8BGS2-2	Q9DBL7	A1ILG8;Q8BX70;Q8BX70-3;Q8BX70-2	Q5MJS3	P47867	P26339;Q3UN28	Q63829;Q5U5W6		P98083;P98083-2;P98083-3	Q8VEH8;Q9CWA6	A0AUN0;Q4G0C0;G3X928	Q61024;Q3TV20;Q3TIA9	Q8BXA5	Q922A2;Q3TJ49;Q07076;Q3UYL7;Q8BP75;Q8CCV9	Q9ER72;Q3UXN3	Q3TMB8;P54822;E9Q242;E9Q3T7	E9PZ00;Q3TXJ0;Q8BFQ1;Q3U8C4;Q3TXP9;Q3TWL8;Q3TWM9;Q3UAS4;Q3U897;Q3U825;Q3U5W2;Q3TWF9;Q3TKB2;Q3TIT5;Q3TID4;K3W4L3;B2RUD7;Q3UFE8;J3QPG5;Q61207;Q3TKK3;Q3UE29		Q9D4H1;Q8K2J3	P52480	P60879-2	Q9DB77	B7ZWL1;B2RXR3;Q6ZQ08-2;Q6ZQ08;Q6ZQ08-4	Q9DAU1;Q9DAU1-2	Q8BH15-4;Q8BH15-3;Q8BH15;Q8BH15-2;Q8BH15-5	D3Z1H9;Q7TMS6;Q3U011;Q9JL62;D3Z1H8	B2RXC1	Q9CYN2
	Q8R344	Q3U3S0;P58404-2;P58404	A2ATI9;Q99JX3;Q3TG07;Q3TX06;Q3TIK1;A2ATI8;A2ATI6;Q99JX3-2;Q3V458	Q6XPS7;Q9DBC9	O55106;F8WH41;Q3UWX9;Q8BKL4	Q9EQ20;Q8K0L1	Q543Q4;P35276;Q8BP17	D3Z1F9;Q8C0M0-2;Q8C0M0;Q8C0M0-3	Q8BGT8;F7D3N3;Q8BGT8-2;F6U6Z2	Q3U4U6;P80318;E9Q133;Q3U0I3;F6Q609	Q3UP01;P62046;Q3UWY4;Q3TU90	Q8CH02	Q8VDK1-2;Q8VDK1;D3YY53	Q6KCD5-2;Q6KCD5	A2AT37	Q3UBU9;Q62446	Q9JK38;Q3THZ8	Q3TZ63;Q8R3D1	Q3UL64;O35657	P36916;A2VDH5;Q52KE3;P36916-2	Q3TET5;Q9CXT8	P23475		Q9D0A3	Q8K2C6;Q5M8R0	A8CVP4;A8CVP1;Q4ZJB3;E9QP62;Q99JW4;Q9D7B2	Q9CWW6	B7ZWL1;B2RXR3;Q6ZQ08-2;Q6ZQ08;Q6ZQ08-4	Q571M4;Q8VC28	D3Z1H9;Q7TMS6;Q3U011;Q9JL62;D3Z1H8	D3YUP1;Q9WVG6-2;Q9WVG6	Q9D1H8		Q11011;E9Q039;F6QYF8;E9Q6F4	Q3TIC8;Q9CZ13;Q3THM1;Q8K2S8	Q9JJE1;Q3U3F4;Q3TMJ8;P31938;Q3UK05;Q3TMW4	Q6RI64;O09061	Q501J7-2;Q501J7;Q501J7-3	D6RI47;D3YWI4;E9Q1I6;F8WHT5;G3UVW1;P19258	A9E3L2;Q9Z2I2;Q80YE1;Q810R7	Q9QWR8	Q8CJ40;Q8CJ40-3;Q8CJ40-2	Q3TDM8;E9Q855;Q3UK26;Q3UXS0;O35609;B2M0S2
	Q3TVW1;Q8R1X6;D3Z3F8;Q8R1X6-2	Q8BFW7;Q8BFW7-4;Q8BFW7-5	B1AU74;Q9CWP6-2;Q9CWP6-3;Q9CWP6;Q3U0U1;Q9CWP6-4	P97401	A2A8L5;F6Y3V0;F6S1X8	O55106;F8WH41;Q3UWX9;Q8BKL4	Q4FJQ0;P51150	Q9R0M7;Q91X42	Q9CWJ9	Q9ESY9	Q3UKA4;P00329	Q4FJQ0;P51150	A2AQ17;Q9CWX2	Q543R4;Q00493	Q4V9T8;P48024;Q3UBT8;J3QN87	Q9DBL7;REV__Q8C6R9;REV__F6QNN0;REV__J3QNE4	Q91VE6-2;Q91VE6	Q9D6U8	Q9DB15	A2AFF6;O35638	P70677;Q8BNT4	Q561M4;Q3UDC3;O88746		Q3TDA1;Q8BX94;Q571D2	Q8K019-2;Q8K019;Q3UDL9;F8WI22;A0A087WQA0;Q3UR37;Q8K019-3;Q3TSZ0;A0A087WRN1	Q9D0J4	Q9D0J4	Q3USZ8;Q3TS89	Q71FD5	Q5SSZ5;Q5SSZ5-2	Q0P6I6	E9Q1S3;Q01405;Q8C1E4		P70704-2;A1L332;F6WYQ5;P70704-3;Q5DTG0;P70704;Q8CA15;Q52KQ7	P49813	P97868-2;P97868	Q3THG9;A2A4P3;A2A4P4	E9QAS4;E9QAS5;Q5DTP7;Q6PDQ2;Q99JM0	Q0PD65;P53994;Q8BXY4;Q6PDZ3	S4R1W1	B7ZNW0;A1A4A7;Q8BX10	Q5PPR2;Q3U1G4;Q6P1Y9;Q8R3S6	Q9D8V7;Q8BM48
	Q99KG3-2	P99024	Q3U186	E9Q3Q6;Q54AJ5;Q61490;E9Q4G8	P54071	Q9CWF6	Q3V3M3;Q78P92;P97376	Q91YL3	Q3U4A3;Q69ZP6;Q9CWK3	Q8VDS4	Q0PD63;P63011	Q3UH37;B9EIV5;F7BX42;E9PZM8;Q3UH69;Q6TLW2;Q99J85;Q6PD36;H3BLN6;F8VQB8;Q6TLW1;Q6TLW0;Q6TKP2	O88967	Q99K41;Q3U254;Q3USG5;Q3UUU0	Q58DZ3;P62889;Q497D7;Q5PR15	Q9CQ56;Q5I940;Q05CJ0;Q9CQ56-2;D3Z6D3;Q9CYN8	Q78KL9;Q3TAV0;Q3UD20;Q3T9B4;Q9D8S4	P18581-2;E9QJY0;P18581	I6L970;Q3TBX5;Q3U3K9;P70295;Q3TAZ9	D3YUP1;Q9WVG6-2;Q9WVG6	Q8CG03;Q8BJ62	Q6NSU3		Q9WTZ1;D3Z497	P36552;Q3U029	Q69ZW3-2;Q69ZW3	A0AUN0;Q4G0C0;G3X928	Q9CQ56;Q5I940;Q05CJ0;Q9CQ56-2	Q9D0A3	B2RXC1	Q8CIH9;Q3TUW2;Q3UGA8;Q3TKC5;Q3UGU3	Q8R121;Q8R121-2		Q543F6;P49615	Q566K0;P17095;Q3TE85	Q9EQC8;Q05CA9	Q9R1K9;Z4YJH1;B1AUQ7	B2RWW6;Q3UHQ5;E9PVA8;Q8CHH7;Q6PGM5	D3YWT0;D3YTS1;Q9R0P6;D3Z569;Q6PET3	Q9ESR1;Q540E6;Q921J2	Q9CXS4	B7ZNW0;A1A4A7;Q8BX10	Q9EQQ9-3;Q9EQQ9
	Q9D8U3	Q80U93;Q8CHS9	U5LK19;E9Q5B0;Q80VC9-2;Q80VC9;U5LGS1;U5LHW1;U5LK70;U5LK15;U5LHT8;U5LGR7;U5LGT0;U5LHW9	Q8BPG5;K7Q7T7;Q3TLP8;P63001;Q9D859;Q8C4N8;Q14A12;P60764	Q3TLQ4;P58064	E9QP00;Q3TAP5;Q6PFR5	K3W4P9;Q8CFE3	Q543Q4;P35276;Q8BP17	Q80T84;D3Z624;G3XA21;E0CZ22	D3Z600;O09012-2;O09012	Q9CQ65	Q9EQT6	D3YWD8;Q2VWQ2	Q91YP0	Q91YL8;Q5BLJ4;Q3UAE6;Q3TIJ4;Q9D7H3;D6REI7;D6RD00	B2RXY7;P48758	Q3ULL6;Q80UI8;Q149I6;Q9CS15	Q3UE92;Q3UKF5;S4R1I3;Q6P1B1;Q3TL27;Q8VDK8;Q8BKH1	Q548L6;P48318;D3Z1L8;Q8C6I7;D3Z5S3	Q4VA93;P20444	Q63829;Q5U5W6	Q91WD5;D3YXT0;F6RJ83		D3Z1H9;Q7TMS6;Q3U011;Q9JL62;D3Z1H8	Q5M9N8;Q3UBI6;P14148;Q3TK73;F6XI62	Q61024;Q3TV20;Q3TIA9	P18608;D3Z607;Q8CEW1	Q6ZPS0	Q3TE95;Q8BP92	Q99J83	P70677;Q8BNT4	Q0P6I6		A2AW05;Q05DR5;Q08943;Q08943-2	Q99LC2	Q3TLI6	Q3V1M8;Q3U4Z7;Q8VDJ3;A0A087WP83	Q6NVE8	S4R1W1	Q3THC1;Q9CR00;Q3ULI3;Q9CZZ4	P10649;A2AE89	Q4VAE8;Q9CQC7;Q9DBH2	B0QZX9;Q8BHC4
	B9EI57;Q8CH25-2;Q8CH25	Q3TT51;P12961	Q6PAV2-2;Q6PAV2	P27046	E9PX68;Q5BKS1;O54716;E9Q585;Q3UHY0;E9Q1Q0;Q3UUI2;Q6GQW1	O54988	D3Z1F9;Q8C0M0-2;Q8C0M0;Q8C0M0-3	Q9EP53-4;Q9EP53-3;Q9EP53-2;Q9EP53	Q9D881;P19536	Q3UWQ9;Q3UJ70;Q8JZK9;Q8K0I5	Q8R409;Q8VDF7	Q3UEQ1;D3YTM1;E9Q9A0;D3YUD3;D3YUL8;D3Z230	D3YZR1;Q9JHE7;D3Z6S3;D3YYU6	Q3UWH3;Q3TL56;Q80X41-2;Q80X41-5;Q80X41-3;Q80X41	Z4YKB8;Q3TEA8-2;Q3TEA8;Z4YKA3;Q3TEA8-3;A2AM65	E9Q774;E9Q777;Q6ZQ80;Q8BSJ2	Q3TJD7	Q5SUF2;Q5SUF2-3;Q5SUF2-2	P70677;Q8BNT4	D6RI47;D3YWI4;E9Q1I6;F8WHT5;G3UVW1;P19258	Q561M4;Q3UDC3;O88746	Q8VCF9;Q8BN51;Q9R088		Q9CZS7;Q544E3;O70172;F6RJE8	Q9DBF1-2;Q9DBF1;G3UYR8	Q542V3;Q8VE97;Q8K3A8;A2A837	G3XA13;Q99NH2;B2RUK1;B7ZNY3;F6S7Z1;A5D6P2;Q99NH2-2;E0CXR8;E0CZE2;E0CZ83;E0CXL4;Q99NH2-4;Q8BPQ6;Q8BPQ4;E9PYJ2;F6TSJ9;Q99NH2-3;E0CX45;E0CY24;Q99NH2-5;F6UGU7	A0A087WS27;D3Z5S8	Q571E4;Q8CC47	Q9QZ06;Q8BQL7;A9JEI5;Q8C5G6	Q543M3;Q3UHZ4;Q3U5U9;Q3TT75;P06797;Q3UWH6;Q9D0C0;Q3TVJ1;Q3TNC8	P17156;B7U582		D3Z6J0;Q6SKR2;Q6PRU9;Q4KMV5;E9PXT7	O54941	Q922F6	Q8R326-2;Q8R326	Q9D187;F8WHV1	Q3TE95;Q8BP92	Q3UEQ1;D3YTM1;E9Q9A0;D3YUD3;D3YUL8;D3Z230	P70704-2;A1L332;F6WYQ5;P70704-3;Q5DTG0;P70704;Q8CA15;Q52KQ7	Q9D4H1;Q8K2J3	Q922Q8;Q3TF84
	Q3THE7;A7VL18;Q9JLJ2;Q3UDG0;Q3TMT4;Q3V1N7;Q3U367;Q3TG52	P27546-2;P27546;P27546-3;E9PZ43	F6TBV1;F6WHL0;A2ADH1;Q9CQY5-2;Q9CQY5-3;Q9CQY5	Q3U186	P62137;Q3U8W0;Q3TYF5	Q99LB4;Q3UJ44;D3YTL5;Q3TNN6;P24452;D3YZN3;D3YU77	Q8C7K6	Q3UP01;P62046;Q3UWY4;Q3TU90	O54962	Q9DCC4	Q9CZS7;Q544E3;O70172;F6RJE8	Q543R4;Q00493	Q148P2;Q9D404	Q9EP52	Q91WK1	Q78KL9;Q3TAV0;Q3UD20;Q3T9B4;Q9D8S4	Q9D8Y1	Q6V4S5	D3YUP1;Q9WVG6-2;Q9WVG6	E9Q1S3;Q01405;Q8C1E4	Q8BND5-2;Q8BND5;Q8BND5-3	Q8R1E1;E9QL80;Q6A0A4;Q3UZK0;Q91YX5;D3YVK0		Q3U661;Q6A006;Q8BU11;Q3UVQ1;H3BL89;Q66JW3;Q80W03	P61164	Q9CWW6	A8CVP4;A8CVP1;Q4ZJB3;E9QP62;Q99JW4;Q9D7B2	Q9EQU5-2;A2BE93;Q3T9S3;Q9EQU5;A2BE92;Q5U445	Q8QZW3	D3YX15;Q61153;D6RDQ6	Q8R121;Q8R121-2	Q8CIH9;Q3TUW2;Q3UGA8;Q3TKC5;Q3UGU3		Q543M3;Q3UHZ4;Q3U5U9;Q3TT75;P06797;Q3UWH6;Q9D0C0;Q3TVJ1;Q3TNC8	P62311	P11983;P11983-2	P97868-2;P97868	Q8BJ71	Q3TCD4;Q9WUR2-2;Q9WUR2;E9PYC6;E9Q858;E9PUY9;E9PYA9;E9PVM6;E9Q7A8	Q9D4H1;Q8K2J3	Q52L66;Q91W67	Q3U661;Q6A006;Q8BU11;Q3UVQ1;H3BL89;Q66JW3;Q80W03	P63101
	E0CYX9;Q3TC33;E0CYP1;Q3TC33-2	Q66JR8	D3YU12;Q8K2T1;G5E8S7;Q8K2T1-2	Q3UKA4;P00329	Q9D0M5;D6RIN4	Q9WVJ3-2;Q9WVJ3;Q3U496	Q8BP21;Q545C3;P30285;E9Q9E4;E9PZX7;Q9D193	Q91XE8	Q5DTI3;P46097;Q9JM89	V9GXK0	Q6T5E4;A2IQH4;Q8BK09	P70677;Q8BNT4	Q0VGQ1;O70503	D3Z7C0;Q3UKS6;Q9Z2Q5	Q5M9P7;Q9CR86;Q3UD53;Q3U434	Q8R1V4;Q5SVW9	Q3U6D7;O55100-2;O55100	Q3UNN2;Q3U8S1;Q3U468;A2APM5;A2APM3;A2APM4;E9QKM8;Q80X37;A2APM1;A2APM2;P15379-2;P15379-3;P15379-6;P15379-11;P15379-5;P15379-10;P15379-9;P15379-4;P15379-8;P15379-7;P15379	Q8QZW3	Q91WD5;D3YXT0;F6RJ83	Q8VCT0;Q3U8R7;P35951;Q3TVR4;Q3TDD1;Q91ZJ1	Q9CQ10		A2VCS7;E9PWM3	Q8K0D5	Q8VDM1;F7C2Y9	Q91WQ3	Q8BHN3	D3YWD8;Q2VWQ2	Q99K86;Q9R069;Q8BGB4	C7G3P2;Q61136;Q8BPG8	Q543M3;Q3UHZ4;Q3U5U9;Q3TT75;P06797;Q3UWH6;Q9D0C0;Q3TVJ1;Q3TNC8		Q9CZS7;Q544E3;O70172;F6RJE8	B9EKJ1;A3KGU7;B2RXX6	Q2M2Q8;Q3TE41;Q920Q6-3;Q920Q6-2;Q920Q6;B1AT13;Q8CD63;Q32LZ4	P60879-2	F8VQC9;I1VGT4;D3Y272;E3UVT8;I1VGT5;H6WZF5;J9RZB2;J7H931;J9RV59;D3Y273;H6WZ45;I1VGT6;Q8BTY2-2;Q8BTY2;U3RKD2;J9RDH0;J9S4N6;E3UVT9;U3RF68;J9S7F7	Q5SRX1;Q5SRX1-2;Q5SRX1-3;Q5SRX1-4;Q5SXA5;Q5SXA4;Q5SRX1-5	Q8R1E1;E9QL80;Q6A0A4;Q3UZK0;Q91YX5;D3YVK0	D3YWK1;Q80W47	Q52L66;Q91W67	Q6PEM5;Q5D0B0;Q6ZY49;Q52KI7;Q3TL96;Q8K295;P55302;Q6PB52;Q8C252
	Q3TCN2-2;Q3TCN2	P12787	O35153;I6L979	E9Q2W8;Q9D920	Q5DTI3;P46097;Q9JM89	Q3UCF2;Q6A068;Q05DT4	Q91YL3	Q9D020-1;Q9D020	P62137;Q3U8W0;Q3TYF5	Q5BLJ7;P62301;Q921R2	Q56A13;Q8BG94;Q8BTK9;Q8CF03;Q8BQS7;A2AU52	P97807-2;P97807	Q3TWZ9;Q3TJ95;Q6IRU5-2;Q6IRU5;A2VCP8;F7BHJ0;Q6IRU5-3	Q64685;Q9JJM6	Q9ERB0	P62918;Q3UJS0;Q3THC7;Q9Z237	Q3UVI9;Q99LE6	E9PZJ8	Q8R1K4;Q8R1K4-2;F8WHK6;Q8R1K4-3	B2RXC1	Q8VCF9;Q8BN51;Q9R088	Q3TET5;Q9CXT8		Q9ESR1;Q540E6;Q921J2	Q544Y8;Q3UC19;Q3TVQ3;Q3U9K2;Q9D2V3;Q3UD85;Q3UAJ3;Q3U9N4;Q3U8W3;Q3TW77;P28798;Q3UDD6;Q3TX66;Q3TWT4;Q3U5Q6	G3XA13;Q99NH2;B2RUK1;B7ZNY3;F6S7Z1;A5D6P2;Q99NH2-2;E0CXR8;E0CZE2;E0CZ83;E0CXL4;Q99NH2-4;Q8BPQ6;Q8BPQ4;E9PYJ2;F6TSJ9;Q99NH2-3;E0CX45;E0CY24;Q99NH2-5;F6UGU7	Q3U8E7;P18155	P70303;P70303-2;P70303-3	D3Z1H9;Q7TMS6;Q3U011;Q9JL62;D3Z1H8	Q8VEK0;D3YVV1	P70704-2;A1L332;F6WYQ5;P70704-3;Q5DTG0;P70704;Q8CA15;Q52KQ7	Q9EQT6		Q7TQ39	Q91VM2;P62320	Q8BUY5	P11983;P11983-2	Q3TLE2;Q8CIB5;Q3UMA4	P70677;Q8BNT4	P36916;A2VDH5;Q52KE3;P36916-2	Q5SSZ5;Q5SSZ5-2	P70677;Q8BNT4	Q5XK22;Q3U3Q7;Q3TU20;P09470;Q8K233;F6QCP8
	I1E4X7;Q9JI46;H3BLR8;B2KF67	P97449;Q3UP74;Q3TB69	E9Q3Q6;Q54AJ5;Q61490;E9Q4G8	A0A087WRF2;Q8BXK8	Q9CQ60;Q8CBG6;D3Z4X1	Q3UBP6;Q3UBQ4	Q9R0M7;Q91X42	Q6P1F1;E9Q6B6;E9Q6E0;Q8CHB5;Q6NV54;Q3UHB5;J3QNR6;K3W4S4;Q9ESN9-2;Q9ESN9-3;Q9ESN9-5;Q9ESN9-4;Q9ESN9;Q9ESN9-6	Q8BTW3	P62073	Q3UHW0;E9Q6M7;Q3U4T5;Q3TTW5;Q3TRI4;Q3TQ21;Q3UR00;Q80U78-2;Q80U78-3;Q80U78	Q9R1E6;Q9R1E6-3;G3UXY9;Q9R1E6-2	Q3UYP2;Q3TVT6;Q9CQF9;Q99JK4	Q3UP01;P62046;Q3UWY4;Q3TU90	A0JNY3;Q8BUV3	Q8BN32;P29341;Q3U8U8;Q99KL3;Q9DBE3;F6ZAX1;Q05DT1;Q921B8;Q8C7D3	Q9CRB6;Q1JPR8	Q9JKV1;Q8VCI8;D3YUD8	Q8C996	Q5MJS3	Q3UL64;O35657	Q3UL64;O35657		Q8C996	P14152	Q91WQ3	Q542V3;Q8VE97;Q8K3A8;A2A837	Q80U44	Q8CBY0	Q8C996	Q9EQT6	D3YX15;Q61153;D6RDQ6		Q3TMB8;P54822;E9Q242;E9Q3T7	Q8VDP4	Q6RI64;O09061	Q9EQC8;Q05CA9	G3UXA6;G8JL74;Q8BHD7-2;G3UZ01	D3YU12;Q8K2T1;G5E8S7;Q8K2T1-2	D3YWD8;Q2VWQ2	B2RRX2;P63328-2;P63328;Q4V9X0	P70704-2;A1L332;F6WYQ5;P70704-3;Q5DTG0;P70704;Q8CA15;Q52KQ7	Q3UQ26;A2AI52;Q80U87;Q3UZ62;Q58E42
	D3Z3B2;E9Q9C5;Q8C1D9;Q3UK60;A3KML5;Q80YP7;P63082	E9PXE2;Q3UHQ9;G3UX72;E9PXE1;Q6PDM6;D3YUF3;D3YUF4;G3UXP9;E9Q863;E9PY13;E9PY12;E9QPM7;Q003U3;Q64096;G3UYM8;Q80U26;F6VR53	Q6XPS7;Q9DBC9	Q64332	Q5SZA3;P15864	Q3UZ58;Q61578	Q9EQT6	Q9CZU7;Q8C876;P17047-3	G3UXL2;Q9D7G0;Q3TI27;Q3UPD5;Q3UYQ0	Q3UHW2;Q3TT11;P51660	Q80TB8;Q8BL94	Q5D0A4;Q497P1;O35526;D6RFB9	Q9DAB3;Q9CQW2	Q9D4H1;Q8K2J3	P0CW03;A0A087WRP7;A0A087WNZ5;P0CW02	Q8BFZ3	Q8BQV7;Q6ZWX1;O55142;Q9DC85	Q9Z1T1;Q3TQ33;Q3UPG0	E9PZ00;Q3TXJ0;Q8BFQ1;Q3U8C4;Q3TXP9;Q3TWL8;Q3TWM9;Q3UAS4;Q3U897;Q3U825;Q3U5W2;Q3TWF9;Q3TKB2;Q3TIT5;Q3TID4;K3W4L3;B2RUD7;Q3UFE8;J3QPG5;Q61207;Q3TKK3;Q3UE29	Q5U458;E9Q8B3	Q99KI0	Q3V384;F6VT60		Q543Q4;P35276;Q8BP17	Q921W2;Q545C1;P70318;D6RGU1	Q3U8E7;P18155	Q3UKT3;Q3TG75;P29758;Q3UJK5	Q3UDP8;Q9JJZ4;F6SPK0;Q3TV38;B1AWT7	Q3TLS3	Q3U2Z6;Q3TDY6;O89023	Q5MJS3	Q9CZS7;Q544E3;O70172;F6RJE8		Q3V3M3;Q78P92;P97376	Q3U1S6;Q91W50;Q8JZN2;Q80TP8;Q3U4S7;Q3TXH7;Q8R3R1;Q3U672	Q5F239;P62254;D6RES1	Q5F239;P62254;D6RES1	Q9D002;Q9CZE1;Q545N1;P56873	Q8R1K4;Q8R1K4-2;F8WHK6;Q8R1K4-3	Q3UYC0;Q3UYC0-2	Q9D4H1;Q8K2J3	Q5SSZ5;Q5SSZ5-2	Q8R5C5
	Q3U4W8;P56399	B9EI57;Q8CH25-2;Q8CH25	Q8BPG5;K7Q7T7;Q3TLP8;P63001;Q9D859;Q8C4N8;Q14A12;P60764	P98083;P98083-2;P98083-3	Q3TKQ3;Q8VBV3;A2AV19	P49813	Q6P1F1;E9Q6B6;E9Q6E0;Q8CHB5;Q6NV54;Q3UHB5;J3QNR6;K3W4S4;Q9ESN9-2;Q9ESN9-3;Q9ESN9-5;Q9ESN9-4;Q9ESN9;Q9ESN9-6	Q8BTS3	E9Q8K8;Q6ZPZ3-2;Q6ZPZ3;Q6PAI8	P12815;Q8C5M4;P12815-2;Q3UGE5	Q3UH37;B9EIV5;F7BX42;E9PZM8;Q3UH69;Q6TLW2;Q99J85;Q6PD36;H3BLN6;F8VQB8;Q6TLW1;Q6TLW0;Q6TKP2	P58022-2;P58022	Q91ZP9;Q3B7X9;Q3B7Y0;Q91ZP9-2;D3Z103	A2VCS7;E9PWM3	B1GX80;B1GX81;Q61036-2;Q61036;A3KGC5	O55234;Q8BTY5	Q8BHD7	E9QNN1;Q3UR42	P24638;Q3UZN1;Q3U4F3	F6TBV1;F6WHL0;A2ADH1;Q9CQY5-2;Q9CQY5-3;Q9CQY5	Q9CQ10	Q99KI0		A2ASR7;A2ASR8;Q3ULL2;Q2LC58;P25916	Q8BK29;B1AT82;Q9D0M1;B1AT83	Q61292;Q3USI2	P36552;Q3U029	Q8CE96;Q8CE96-3	Q6NSU3	A9E3L2;Q9Z2I2;Q80YE1;Q810R7	Q9CQ10	P70704-2;A1L332;F6WYQ5;P70704-3;Q5DTG0;P70704;Q8CA15;Q52KQ7		Q9ESR1;Q540E6;Q921J2	Q6ZWZ6;P63323	Q4FK54;P61290;A2A4J1	Q8BUY5	Q3TXV1;Q3TKV1;Q8VDM4;Q3TW71;Q3TI61;Q3U9Y8;Q3TWL6;J3KMQ2	Q6NSU3	P47867	Q5PPR2;Q3U1G4;Q6P1Y9;Q8R3S6	A2AKH7;Q8JZX5;Q9CSK4;Q9D1G5	Q9D1Q4
	Q541Z2;Q61239	Q9D0K8;Q5RL57;Q3TLG2;Q9R0L7	Q3UKA4;P00329	P60766;Q3UL78	Q9Z2I8;C6EQH3;Q9Z2I8-2	Q3V275;Q99N23	O88307;Q3UV32	Q5D0A4;Q497P1;O35526;D6RFB9	Q6P1J1;Q3TXY0;P97427;Q3TY94	Q99NF7;Q5BKS2	O08832	Q5SRX1;Q5SRX1-2;Q5SRX1-3;Q5SRX1-4;Q5SXA5;Q5SXA4;Q5SRX1-5	Q8CCX9;Q9JKF7	Q9DCT1;Q8CEB6	G3X8Q0;O89090;A2TH11;O89090-2	Q6PDL0	Q8R2Y8	Q9D7A8	D3YWT0;D3YTS1;Q9R0P6;D3Z569;Q6PET3	Q9CQ54;Q9D846	Q6NSU3	Q8BND5-2;Q8BND5;Q8BND5-3		D3YUP1;Q9WVG6-2;Q9WVG6	O88428;Q9QYS0	Q8C6E3;Q542K4;Q3UZE7;Q3TVZ1;P24270;Q3UF58;Q91XI2	P68372;Q9CVR0;Q9DCR1	P49442	Q8R1K4;Q8R1K4-2;F8WHK6;Q8R1K4-3	P70677;Q8BNT4	D3YXJ5	D3YXJ5		Q543Q4;P35276;Q8BP17	Q3TK27;Q8CI11;Q8CI11-2	Q8R326-2;Q8R326	Q4FK54;P61290;A2A4J1	Q9DCY1;P24369	Q8C0W0	B2RUS7;Q8BNE2;Q6PGE2;Q9Z2P1	Q3THC1;Q9CR00;Q3ULI3;Q9CZZ4	Q8R1E1;E9QL80;Q6A0A4;Q3UZK0;Q91YX5;D3YVK0	Q9CZP0
	A0PK78;Q78PG9	Q3THE7;A7VL18;Q9JLJ2;Q3UDG0;Q3TMT4;Q3V1N7;Q3U367;Q3TG52	Q8BKR5	Q9CQU0	Q61733	Q542X7;P80314;Q9JJD8	Q3UA17;Q791V5;A2AFW6;Q9D050;Q05C68	Q545J3;Q9R098	P62141	P70333	Q3U4S1;Q9WV80;Q3TI63	Q8BJY1	D3Z7C0;Q3UKS6;Q9Z2Q5	Q9QWR8	D3Z600;O09012-2;O09012	Q8BHD7	E9Q7B0;Q60715-2;Q3TTT2;Q3TN84;Q60715;Q3UF16	B9EKJ3;Q80TL7-2;Q80TL7	Q99JB5;Q9CPS5;Q8BKP5;Q3TW90;Q9CX56;Q3TVY0;Q3TG45;Q3TI95;Q3U617	Q8VCF1;Q8VCF1-3	E9Q7N5;Q8R2Q4-3;Q8R2Q4-2;Q8R2Q4;Q3TML3;Q3TSU6;Q8C1C2	S4R1W1		Q922A2;Q3TJ49;Q07076;Q3UYL7;Q8BP75;Q8CCV9	Q542X7;P80314;Q9JJD8	Q8BQ47;D3Z0T5	Q3U3S0;P58404-2;P58404	Q3TCE7;Q91Z25;Q9WV32;Q3U094;Q3TBA2	Q3V3M3;Q78P92;P97376	Q5MJS3	Q9CZS7;Q544E3;O70172;F6RJE8	Q5MJS3		P10649;A2AE89	E9Q4D5;Q8VEL9;Q8VEL9-2	A0A023T778;Q9CQL1;P61327;G3UZW7;G3UYI5	Q61292;Q3USI2	Q4L0E7;Q678L1	Q8VCG1;Q9CQ43;Q9JJ44	P70677;Q8BNT4	E9Q1Q9;P97328;Q9CPP1;D3YVB6	Q3V3M3;Q78P92;P97376	Q9D1D4
	Q80T84;D3Z624;G3XA21;E0CZ22	Q3TDN8;Q8R164	Q56A13;Q8BG94;Q8BTK9;Q8CF03;Q8BQS7;A2AU52	Q9JM62;Q9JM62-2	Q3V0T8;Q9WTN0;Q9CZZ6	O08553	Q545J3;Q9R098	Q8VCG1;Q9CQ43;Q9JJ44	Q9CWU9	Q66JP1;P62984;J3QK04;E9QNP0;E9Q4P0;D3YYZ2	B2RPS1;Q0PD56;P61021;Q8C458	Q78P93;Q3U646;Q9WV54;Q3U8A7;Q3TWT5	Q9CWG8;Q9CWG8-2	Q543M3;Q3UHZ4;Q3U5U9;Q3TT75;P06797;Q3UWH6;Q9D0C0;Q3TVJ1;Q3TNC8	O54962	Q5SWZ5;F6S5I0;F6RND9;P97434-3;P97434;P97434-5;P97434-2;Q8CHC7;P97434-4;Q8CBS0;F6XZM9;J9JI90	Q8R105	Q8BL66	Q8K1J6;Q8K1J6-2	B2RUS7;Q8BNE2;Q6PGE2;Q9Z2P1	Q8VCF1;Q8VCF1-3	Q8VEK0;D3YVV1		Q5PPR2;Q3U1G4;Q6P1Y9;Q8R3S6	P61022;B0R091	Q3UUF0;Q8C541;O08914;Q8BRM1	Q3UXG7;A2AMC3;Q91ZW2	Q8BFY9-2;Q8BFY9;Q3TKD0	P70677;Q8BNT4	D3Z7C0;Q3UKS6;Q9Z2Q5	P17156;B7U582	D3Z1H9;Q7TMS6;Q3U011;Q9JL62;D3Z1H8		Q9JKN1	Q9CPQ3;Q3UBW3	Q80WR0;E9Q3G8;Q80UN3	Q80XL6;D3YTQ5	Q5RJV4;Q7TNU0;Q66JR7;Q9D0F9;Q3U6X6	Q8CBY0	B7ZNW0;A1A4A7;Q8BX10	P70677;Q8BNT4	Q3THC1;Q9CR00;Q3ULI3;Q9CZZ4	A2RS22;Q9WUM3
	Q91YJ5;Q5M6W7;F6RR02	Q3UCC6;Q9Z2I9;Q3U6C7	Q8BXR1;D3YY38	A2ATI9;Q99JX3;Q3TG07;Q3TX06;Q3TIK1;A2ATI8;A2ATI6;Q99JX3-2;Q3V458	P24529;Q3UTB3;E9Q9G5	Q60I30;Q9D892;Q3U589	Q91XE8	Q3V3M3;Q78P92;P97376	Q4FZG2;Q545P3;P46656;Q3UG56	Q564E8;Q9D8E6;Q9CSM5	Q149D1;Q8BH55	Q8K3X4		A2AKH7;Q8JZX5;Q9CSK4;Q9D1G5	Q6ZWZ2	Q4KML7;Q3UL48;P26040;Q3UXR4;Q3TCP5;Q8CBU4	Q8BGD8	O89112;B2KGR2	Q3TMH2	Q8VEK0;D3YVV1	J3QMM7;K3W4M4;Q9CZ42-3;Q9CZ42;J3QN06	Q3TND6;O54782;F6TMZ3		Q8BHN0;Q8BHN0-2	B9EKJ1;A3KGU7;B2RXX6	Q8VIJ6;Q3TZL2	P70335-2;P70335	Q80ZP8;Q3TMX5;A8C1V1;Q9CXI5;F6USD5;F6T4L3;E0CXA8	Q8BM72	Q0P6I6	Q8VCF9;Q8BN51;Q9R088	Q543F6;P49615		A9E3L2;Q9Z2I2;Q80YE1;Q810R7	Q91YS7;Q63932;Q3UPM3;M0QWN2	Q3V1M8;Q3U4Z7;Q8VDJ3;A0A087WP83	Q2M2Q8;Q3TE41;Q920Q6-3;Q920Q6-2;Q920Q6;B1AT13;Q8CD63;Q32LZ4	A2RSB1;B7ZNL2;Q8C1W9;Q78ZA7	P24638;Q3UZN1;Q3U4F3	Q4VAE8;Q9CQC7;Q9DBH2	Q99K86;Q9R069;Q8BGB4	D3YXH0;P63054	Q8BH04;Q8R3X7;Q3UGF0
	Q3U3S0;P58404-2;P58404	I1E4X7;Q9JI46;H3BLR8;B2KF67	Q9JM62;Q9JM62-2	Q543R4;Q00493	Q3U3H9;P61963;Q80ZU1	Q5EBG8	Q9EP53-4;Q9EP53-3;Q9EP53-2;Q9EP53	P70677;Q8BNT4	Q69ZA1-2;Q69ZA1	Q9JJV2-3;Q9JJV2;D3YWS3;Q9JJV2-2	Q1XID4;Q9CYN9	B7ZP20		Q9ERS2	Q545V3;Q3UJ20;P17183;D3Z6E4;Q922A0	Q0PD50;Q3UHW5;P55258;Q91YW0;Q3TYH2;Q3TYB1;Q0PD40;Q8K386	O55042-2;O55042	A2AQJ7;A2AQJ5;A2AQJ6;Q8BXN9;Q8BXN9-2;Q8BXN9-3	Q922A2;Q3TJ49;Q07076;Q3UYL7;Q8BP75;Q8CCV9	Q9DCV4;A2AGJ2	Q3TND6;O54782;F6TMZ3	E9Q7N5;Q8R2Q4-3;Q8R2Q4-2;Q8R2Q4;Q3TML3;Q3TSU6;Q8C1C2		E9Q1S3;Q01405;Q8C1E4	Q8C9B9	E9PXM6;A8VP81;Q3TCZ2;Q3UJY1;Q9JIM1-2;Q9JIM1;E9PWY7	Q9D6F9	Q9D7N9	D3YU12;Q8K2T1;G5E8S7;Q8K2T1-2	Q4VAE8;Q9CQC7;Q9DBH2	D3YX15;Q61153;D6RDQ6	Q9CQ10		Q544B1;Q3UJW1;Q3U9J7;Q3TVM2;P47738;Q3U6I3	Q01853;Q8BNF8	Q61292;Q3USI2	O08795-2;Q3U518;O08795;Q3TWG2	Q8R0H9;Q3TB03	Q8QZW3	Q9CQU0	A2AKH7;Q8JZX5;Q9CSK4;Q9D1G5	Q9D1H8	Q3ULL5;Q99L45
	Q8VDP4	Q923G3;P47757-2;A2AMW0;P47757-4;Q3TVK4;Q3TRH8;P47757;F7CAZ6	A0A087WRF2;Q8BXK8	Q8BVL3	Q6P1B6;Q6NZN9;Q8BH69	Q7TMK9-2;Q7TMK9;G3UZI2;G3V018;G3UZ48;G3UXJ6	Q9D020-1;Q9D020	Q6TEK5;Q0VGU5	Q3U781;Q9D6W4;P84104-2;P84104;A2A4X6	Q5F2E7;Q5F2E7-2	P51863;Q921S5	P48036		O08832	Q3THB3;Q9D0E1-2;Q9D0E1;Q3TW40;Q570Z0;Q3TQ66	Q8VEH6;Q8VEH6-2	Q3TA69;E9Q912;E9Q6Q4;Q3TU36;Q3TPS9;Q8BKH0	Q9D5J6	O35459;F7B227	Q9EQT6	Q8VEK0;D3YVV1	Q8VCF1;Q8VCF1-3		D3YXJ5	Q91ZP9;Q3B7X9;Q3B7Y0;Q91ZP9-2;D3Z103	P18608;D3Z607;Q8CEW1	Q9CY58;Q3UJK2;Q9CY58-2;Q3UMP4;Q3UEI6;Q9CY58-3;Q3V274;Q9CY58-4	E9Q035;P47758;Q542X6	Q8VCG1;Q9CQ43;Q9JJ44	Q3UC67;Q8JZR0;Q3UKS0	Q543F6;P49615	C7G3P2;Q61136;Q8BPG8		D3YWK1;Q80W47	Q3TGU7;P50580;Q05BN2;Q3UMW2;D3YVH7	Q7TT04;Q3UJY4;P59235;Q3URN3	O70305-2;E9QM77;O70305;O70305-3;F6U2C2;Q3UX07;F7B6X4;Q3UX51	Q8K3W0;D3Z7P0;Q8K3W0-1;Q8K3W0-5;Q8K3W0-6;E9Q0U3;Q8K3W0-4	Q3V169;A2N6K9;E9Q046;O35706;L7N265;D3Z452;Q62183;E9Q2X0;Q99206;Q8C5S9;Q80YU2;Q80W76;Q62184;O35703;E9PYJ0;B2RUN1;Q8C641	Q0PD65;P53994;Q8BXY4;Q6PDZ3	Q8R1E1;E9QL80;Q6A0A4;Q3UZK0;Q91YX5;D3YVK0	Q99K86;Q9R069;Q8BGB4	F6UR10
	Q3TDN8;Q8R164	O09131	P05132;P05132-2	Q543N6;P58389;Q8C0E1;A2AWE9;A2AWF0	Q3TUI3;Q8K2F0;Q05DR7;Q4G5Y4;Q5CCJ9;Q8K2F0-2;A2AKA9;Q53TY6	Q91WK1	P70677;Q8BNT4	O88307;Q3UV32	Q545L9;F7D432;E9PWE0;E0CYV0;P23506;P23506-2;Q8BPI6;F6V9F1	Q9QYA2;Q3UQD0	Q9D020-1;Q9D020	Q80TB8;Q8BL94		Q9DC69	B9EKJ7;P58871;Z4YJL4	Q7TQD5;Q3UGT1;P97742;A8ASF5	Q6DFW4	Q9WVP1-2	Q3TE95;Q8BP92	Q9EPK2-4	Q8R1E1;E9QL80;Q6A0A4;Q3UZK0;Q91YX5;D3YVK0	J3QMM7;K3W4M4;Q9CZ42-3;Q9CZ42;J3QN06		Q99K86;Q9R069;Q8BGB4	G3XA13;Q99NH2;B2RUK1;B7ZNY3;F6S7Z1;A5D6P2;Q99NH2-2;E0CXR8;E0CZE2;E0CZ83;E0CXL4;Q99NH2-4;Q8BPQ6;Q8BPQ4;E9PYJ2;F6TSJ9;Q99NH2-3;E0CX45;E0CY24;Q99NH2-5;F6UGU7	Q3UXG7;A2AMC3;Q91ZW2	Q61292;Q3USI2	Q06138	Q3TCD4;Q9WUR2-2;Q9WUR2;E9PYC6;E9Q858;E9PUY9;E9PYA9;E9PVM6;E9Q7A8	O88325;O54752	D3Z1H9;Q7TMS6;Q3U011;Q9JL62;D3Z1H8	Q8VCF9;Q8BN51;Q9R088		Q99J83	Q9D1M0	O70305-2;E9QM77;O70305;O70305-3;F6U2C2;Q3UX07;F7B6X4;Q3UX51	Q7TT04;Q3UJY4;P59235;Q3URN3	Q9WTI7-3;Q9WTI7-2;Q9WTI7;Q9WTI7-4	Q3TLS3	Q9EPK2-4	Q3U661;Q6A006;Q8BU11;Q3UVQ1;H3BL89;Q66JW3;Q80W03	Q9JKN1	B8X349;Q58A65-2;Q58A65;Q58A65-5;Q58A65-6;E9PUD1;Q58A65-3;Q58A65-4;F6SH61;Z4YMB8
	O09131	Q78ZM0;O70492;D3Z789;Q9CU14;Q9CSC2;D3Z6Z0	Q3UUQ7	O35153;I6L979	Q9Z204-2;Q9Z204-4;Q9Z204-3	B2RRS4;E9PWV7;Q923K4;D6RDC6;Q923K4-2	Q3UP01;P62046;Q3UWY4;Q3TU90	Q8BP21;Q545C3;P30285;E9Q9E4;E9PZX7;Q9D193	Q3UJ34;Q3UEJ7;P16460;J3QNG0	Q8VC30;Q3UTZ4	Q6PDI6;Q6PDI6-3	B2RWW6;Q3UHQ5;E9PVA8;Q8CHH7;Q6PGM5		D3YU12;Q8K2T1;G5E8S7;Q8K2T1-2	Q9JLZ3;F6RT60;F6R307	Q8CGA0	D3Z1F6;B9EK90;Q8VDU5	Q3UT02;E9Q066;G3X9Q6;Q8BWW4	Q3U2Z6;Q3TDY6;O89023	Q5SSZ5;Q5SSZ5-2	Q6PGG8;Q80VL1	Q99K86;Q9R069;Q8BGB4		D3YWK1;Q80W47	Q3TVP0;P17095-1	Q9D6F9	Q3UUF0;Q8C541;O08914;Q8BRM1	A2AGL5;Q496S6;Q496R6;Q9D9K3	Q8C996	Q9DAU1;Q9DAU1-2	Q99J83	Q3V384;F6VT60		Q8C996	E9PZ91;O89106;E9PVU9	Q6PGL7;Q6PGL7-2;Q8BRP9	Q6PGL7;Q6PGL7-2;Q8BRP9	Q9Z1G3;Q3TG21;Q9D9Z4	Q8C996	Q3V384;F6VT60	Q8CJ40;Q8CJ40-3;Q8CJ40-2	Q9CXS4	E9Q1V5;E9Q914;Q6ZPR5-5;Q6ZPR5-3;Q6ZPR5-2;Q6ZPR5-4;Q6ZPR5;E9Q0L7;E9Q9L1
	H3BIW0;G3X8T2;Q0P678	D3Z3B2;E9Q9C5;Q8C1D9;Q3UK60;A3KML5;Q80YP7;P63082	Q2M3X8-4;Q2M3X8;Q2M3X8-3;B1B1B8;Q2M3X8-2	Q56A13;Q8BG94;Q8BTK9;Q8CF03;Q8BQS7;A2AU52	Q9QZ83	Q9CWK0;Q9CR57	Q5D0A4;Q497P1;O35526;D6RFB9	Q9QWR8	P70122;F6TN03	P42208;E9Q3V6;F6WYM0;D3YYB1;D3Z3C0	Q8BTS3	Q9JIS5		Q9CXS4	P52480	E9QLB2;Q3UFF7	Q6WVG3;Q69ZA6	Q69ZP5;Q4FK22;Q9DC16	D6RI47;D3YWI4;E9Q1I6;F8WHT5;G3UVW1;P19258	Q9ERS2	Q3V384;F6VT60	Q4FJP2;Q3UJ82;O35309		Q4FJP2;Q3UJ82;O35309	Q9ERB0	P36552;Q3U029	Q8BKZ9	Q80U95	Q8C0W0	Q8R1E1;E9QL80;Q6A0A4;Q3UZK0;Q91YX5;D3YVK0	Q99K86;Q9R069;Q8BGB4	Q9Z2C9;G3V027;I6L9A6;G3UYB7;G3UYZ2		Q64521;A2AQR0	Q9DC36;Q8CDE0;Q5SS83;Q3UEG9;Q60634-3;Q60634-2;Q60634	Q8K370;Q9CRH8	A0A087WQS0;A0A087WQM0;E9Q0S6;A0A087WRU0;A0A087WQ94;Q3U0Q9;Q7TSV1	Q80TT9;Q8CAL6;Q543P6;A2AVR6;Q8VHQ9	Q8CJ40;Q8CJ40-3;Q8CJ40-2	Q9JKN1	P97807-2;P97807	B2RRX2;P63328-2;P63328;Q4V9X0	Q4V9T8;P48024;Q3UBT8;J3QN87
	Q543Y7;Q61644;Q3TYF2	Q8C167;Q8BKS6;Q8C167-2;Q8C167-3	Q8VEK0;D3YVV1	U5LK19;E9Q5B0;Q80VC9-2;Q80VC9;U5LGS1;U5LHW1;U5LK70;U5LK15;U5LHT8;U5LGR7;U5LGT0;U5LHW9	Q3UCF2;Q6A068;Q05DT4	Q5EBP9;Q62318;Q3UDN8;Q62318-2	Q9QWR8	Q9DB29	O08749;Q3TIE8	Q8BTW3	Q8BJY1	D3YUP1;Q9WVG6-2;Q9WVG6		Q3UCY7;Q3TWN7;Q571E2;Q9R1Q9;Q3TT23;Q3THZ3;Q3UWN7;Q3TKX1	A2AP93;A2AP92;Q543B5;Q3TXG1;Q923A8;Q62073	Q8K4R4-2;X1WI19;Q8BTD8;Q8K4R4-3;Q8K4R4;Q8K4R4-4	Q542A1;Q61334	Q99LD9;Q8BK57;D3Z487;D3Z7J6	Q8CG03;Q8BJ62	Q8K2B3	Q8BTZ7	Q6PGG8;Q80VL1		Q9D4H1;Q8K2J3	Q99J57;Q3THS6;Q3TSS0;Q3UZA2;Q3TED1;Q3UAP7;Q6PE05	Q3UBP6;Q3UBQ4	P55937-1;P55937	Q3TBG7;P21570	Q8BGX2	B2RY22;A0A087WS18;J3QP81;A5D6Q8;A0A087WRK0;A0A087WQF1;E9Q6L0;A0A087WQ95;A0A087WNW8;A0A087WP42;E9QNY9;A0A087WRE8;E9QKH0;A0A087WQ31;Q80TV8-2;Q80TV8	Q3V384;F6VT60	Q99K86;Q9R069;Q8BGB4		Q6XPS7;Q9DBC9	Q9QZX7-2;Q9QZX7	Q3UM45	Q3UM45	O08529;Q3U3A8;Q3U8S5;Q8R486;Q8BPV9	Q99K86;Q9R069;Q8BGB4	D3YXJ5	Q91YT8	Q3V384;F6VT60	Q8VHK9;A0JLR3
	Q66JR8	Q8C052;B2RWW1	P98083;P98083-2;P98083-3	Q8BXR1;D3YY38	Q8BHC2;Q9CX00	Q3TF14;P50247;Q3U4D1;Q5M9P0;Q3U5U5;Q8BPI7	Q3UCZ5;Q3TZW9;P35821;Q3TB93;Q3T9Y9	P62869	Q9Z2E1	Q3UKV4;D3Z5N6;Q61103;F8WIP7	Q3V4A0;Q921L3	Q31093;Q7YPG8;Q7YPD1;Q0WXH3;Q31166;Q8MHM0		Q3URS9-2;Q3URS9	B3V097;Q8BIQ5;Q8BIQ5-2;A2AEK1;B3V099	Q9D8Y1	Q3UE37	Q8CJG0;Q8CGT9;Q6P239;Q8R3Q7;Q6PHA2	Q8VCT0;Q3U8R7;P35951;Q3TVR4;Q3TDD1;Q91ZJ1	O88325;O54752	S4R1W1	Q8BTZ7		Q8VDG5;Q8VDG5-2	P16254;A2AUM6	Q9CZ30;Q3TW21;Q3TJF2;B1AYJ9;Q9CZ30-2	Q8C6E3;Q542K4;Q3UZE7;Q3TVZ1;P24270;Q3UF58;Q91XI2	B6DQM2;Q5F2F2	S4R1W1	Q3V384;F6VT60	Q8R1E1;E9QL80;Q6A0A4;Q3UZK0;Q91YX5;D3YVK0	Q3V169;A2N6K9;E9Q046;O35706;L7N265;D3Z452;Q62183;E9Q2X0;Q99206;Q8C5S9;Q80YU2;Q80W76;Q62184;O35703;E9PYJ0;B2RUN1;Q8C641		Q9CQU0	Q3UVN5;Q9CZ44;Q9CZ44-3;Q3KQQ1;A2AT02;Q9CZ44-2	A0A087WQS0;A0A087WQM0;E9Q0S6;A0A087WRU0;A0A087WQ94;Q3U0Q9;Q7TSV1	Q8K370;Q9CRH8	Q8C419	Q9QXY6;Q8R0V6	Q3U4P3;Q8K1M6-4	Q8BH15-4;Q8BH15-3;Q8BH15;Q8BH15-2;Q8BH15-5	Q91YT8	Q91XB7
	Q9D172	D3Z6P0-2;D3Z6P0	Q543N6;P58389;Q8C0E1;A2AWE9;A2AWF0	Q6T5E4;A2IQH4;Q8BK09	B7ZMP1;B7ZMP1-2	Q14AQ1;P62334;Q8QZS9	E9PXB7;G3X9H8;Q3TQK9;Q8CFI0-3;Q8CFI0;Q641N8;Q8CFI0-2	Q80TJ1-2;K4DI76;J3QJW3;Q80TJ1-4;Q80TJ1	P62830	Q6PE15-2;Q6PE15;F6X5P5	Q50HX4;Q50HX2;Q91V41;Q50HX0;Q50HX3;Q50HX1;A2AL34;Q50HW9	Q8R0F3;E9Q265;E9Q0Z7		Q8C140;Q9QXX4;Q91YK1	Q9QZX7-2;Q9QZX7	Q3TYA4;Q8R3T5;D6RJ81;B8JJ84	Q3UC10;Q3ULG5;Q542I2;P97311	Q8BSX8;Q9EQG9-2;Q9EQG9;Q9EQG9-3	Q8VCG1;Q9CQ43;Q9JJ44	Q3U4P3;Q8K1M6-4	B2RS41;Q8BWF0	Q3U2Z6;Q3TDY6;O89023		Q64685;Q9JJM6	Q9JMA1;E9PYI8;Q80UN0;Q3TC32	P68372;Q9CVR0;Q9DCR1	P99026	B2RXR6;E9QNQ2;J3QK13	Q3TLP5;Q3TLP5-2;F6YTG0;Q3TLP5-3	Q9Z2C9;G3V027;I6L9A6;G3UYB7;G3UYZ2	Q9Z2C9;G3V027;I6L9A6;G3UYB7;G3UYZ2	Q8R1E1;E9QL80;Q6A0A4;Q3UZK0;Q91YX5;D3YVK0		Q5PPR2;Q3U1G4;Q6P1Y9;Q8R3S6	Q80U93;Q8CHS9	P50396	Q8K0C9	Q8VDC1	Q8BGX2	Q8R3N6;Q3UTN0	Q9CQU0	P97807-2;P97807	A8C1T7;Q91XD7
	P99024	Q3UI46;P29595;Q3TY05	Q4VA93;P20444	P05132;P05132-2	D3Z596;D3YWU5;D3Z595	E9QLB2;Q3UFF7	Q8VCG1;Q9CQ43;Q9JJ44	B2RX15;Q6ZPS6	Q9DCJ5	Q9D0M5;D6RIN4	Q8K3X4	B2RPS1;Q0PD56;P61021;Q8C458		Q9DAK9	Q04447	Q8K2T8	Q99KE1;Q3TSD4	O55111	Q99K86;Q9R069;Q8BGB4	Q8CG03;Q8BJ62	Q3U2Z6;Q3TDY6;O89023	C7G3P2;Q61136;Q8BPG8		Q8K3X4	E0CXN5;P13707	Q3UID0;Q6PDG5-2;Q6PDG5	Q8VIJ6;Q3TZL2	R4H4V1;R4H4Y7;Q9EQC5	D3YUP1;Q9WVG6-2;Q9WVG6	P47867	Q3V169;A2N6K9;E9Q046;O35706;L7N265;D3Z452;Q62183;E9Q2X0;Q99206;Q8C5S9;Q80YU2;Q80W76;Q62184;O35703;E9PYJ0;B2RUN1;Q8C641	Q8CBY0		Q9D0A3	P97930;Q6GRA7;P97930-2	Q8K0C9	Q3UUF0;Q8C541;O08914;Q8BRM1	Q3U8R9;Q8CDN6;Q3UNH3;Q3UBF4	Q8BM72	Q11011;E9Q039;F6QYF8;E9Q6F4	A2AW05;Q05DR5;Q08943;Q08943-2	Q9CQU0	P81117
	E9PXE2;Q3UHQ9;G3UX72;E9PXE1;Q6PDM6;D3YUF3;D3YUF4;G3UXP9;E9Q863;E9PY13;E9PY12;E9QPM7;Q003U3;Q64096;G3UYM8;Q80U26;F6VR53	A0A087WQH8	Q6T5E4;A2IQH4;Q8BK09	Q6Q477;D1FNM9;Q32ME1;F7AAP4;D1FNM8;H2BL43;E9Q828	B2M1R7;Q61990;Q61990-3;Q3TF69	Q544I1;Q8VCV2;Q9QYF9;Q8CBD0	Q9CZU7;Q8C876;P17047-3	Q3UCZ5;Q3TZW9;P35821;Q3TB93;Q3T9Y9	Q8BT60;Q3UJS6	Q91YJ5;Q5M6W7;F6RR02	Q543N6;P58389;Q8C0E1;A2AWE9;A2AWF0	Q543N6;P58389;Q8C0E1;A2AWE9;A2AWF0		Q9CXD6;Q9CXD6-3;Q9CXD6-2	Q8VBT9;Q8VBT9-3;Q8VBT9-2	Q7TMN7	Q545K4;Q3UBJ6;Q3UA13;Q3U818;Q3U740;O55135;Q9R071	I3PQW3	Q8BGX2	Q8QZS1;E0CX19	Q99K86;Q9R069;Q8BGB4	Q99J83		D3Z5I1;Q3UPF5-2;Q3UPF5;G3X9X5;Q8K302	Q9QUM9;E0CXB1	Q4FJQ6;Q3U3L3;Q60854;F8WIV2;K7E6F1;E9Q108;E9Q0P9	F8WID5	G3X9J6;E9Q9M1;Q3V1L4	P24638;Q3UZN1;Q3U4F3	S4R1W1	Q544B1;Q3UJW1;Q3U9J7;Q3TVM2;P47738;Q3U6I3	Q99J83		E9Q1S3;Q01405;Q8C1E4	O55222	Q3UUF0;Q8C541;O08914;Q8BRM1	A0A023T778;Q9CQL1;P61327;G3UZW7;G3UYI5	Q8BRF7;Q8BRF7-3;Q8BRF7-2	Q8VDG5;Q8VDG5-2	D3YX15;Q61153;D6RDQ6	D3YXH0;P63054	Q8C996	P62843;Q3UK70;Q3UXS6
	Q60951;Q3UBT1;P62960;Q71V06;Q810K5;Q60950	Q91YJ5;Q5M6W7;F6RR02	Q3TBG7;P21570	Q8BKR5	Q80X54;Q91YJ2	P63280;Q8CFZ0;G3UYP0	Q8BTS3	Q8CH02	O35654;A8Y5G7	P40142	Q3TKN7;Q8JZY2;Q3UTM6	Q3UHW0;E9Q6M7;Q3U4T5;Q3TTW5;Q3TRI4;Q3TQ21;Q3UR00;Q80U78-2;Q80U78-3;Q80U78		Q99K86;Q9R069;Q8BGB4	B2RS41;Q8BWF0	Q922H9;Q922H9-2	Q9EQU5-2;A2BE93;Q3T9S3;Q9EQU5;A2BE92;Q5U445	Q9D8S3	Q9QXY6;Q8R0V6	Q71FD5	C7G3P2;Q61136;Q8BPG8	Q4VA93;P20444		Q3V384;F6VT60	Q3UK33;O08908;F7CB91	Q3TJD7	Q8BQ47;D3Z0T5	Q4ACU6;Q4ACU6-2;Q4ACU6-3	Q3V169;A2N6K9;E9Q046;O35706;L7N265;D3Z452;Q62183;E9Q2X0;Q99206;Q8C5S9;Q80YU2;Q80W76;Q62184;O35703;E9PYJ0;B2RUN1;Q8C641	Q9CZS7;Q544E3;O70172;F6RJE8	Q8CBY0	P56376;Q4VAF0;E9QJT5		Q8R121;Q8R121-2	Q80VP1;Q80VP1-2	Q3THE7;A7VL18;Q9JLJ2;Q3UDG0;Q3TMT4;Q3V1N7;Q3U367;Q3TG52	D3Z0V7;E9QLZ1;P62500-3;P62500;D3YW86;Q3UXU0;P62500-2;H3BLI9;A7LCN1;Q9CVK3;Q6PE86;Q148S0	Q8BKC5;Q8BKC5-2;Q3TT04;Q7TN23	Q8R1E1;E9QL80;Q6A0A4;Q3UZK0;Q91YX5;D3YVK0	A2AW05;Q05DR5;Q08943;Q08943-2	Q3V384;F6VT60	Q8BH15-4;Q8BH15-3;Q8BH15;Q8BH15-2;Q8BH15-5	Q99JZ4;Q3TXJ4;P36536
	Q0P6B2;Q3TUE1;Q3UUU2;Q91WJ8;Q91WJ8-2;Q3TIS5	P62814	P60766;Q3UL78	Q9D3B1	Q8CE50	Q91WU5	Q8R190;A2A9P6;P24788-2;P24788	Q8R190;A2A9P6;P24788-2;P24788	Q61176	Q99KQ9;Q9ES93;Q9R013;A4FUP7	Q6P1F1;E9Q6B6;E9Q6E0;Q8CHB5;Q6NV54;Q3UHB5;J3QNR6;K3W4S4;Q9ESN9-2;Q9ESN9-3;Q9ESN9-5;Q9ESN9-4;Q9ESN9;Q9ESN9-6	Q6ZWY7;Q9WU28;E9PVG3;E9PZ62		Q8BU25	Q9CPQ1	E9QQ99;D3Z1Y1;Q9DBY1;D3YZH4;Q9DBY1-2	Q7TMK9-2;Q7TMK9;G3UZI2;G3V018;G3UZ48;G3UXJ6	Q62084	D3YWD8;Q2VWQ2	Q8VCF9;Q8BN51;Q9R088	Q4FJP2;Q3UJ82;O35309	P70704-2;A1L332;F6WYQ5;P70704-3;Q5DTG0;P70704;Q8CA15;Q52KQ7		Q9QXN3-2;Q9QXN3;Q3UJV0;Q3UBZ2	Q61206;Q8BTA2	P70335-2;P70335	Q4FJQ6;Q3U3L3;Q60854;F8WIV2;K7E6F1;E9Q108;E9Q0P9	Q80X71;D3Z191;D3Z6E0;D3Z0M2;Q9D3D8	Q8K131	B2RRX2;P63328-2;P63328;Q4V9X0	P56376;Q4VAF0;E9QJT5	Q544B1;Q3UJW1;Q3U9J7;Q3TVM2;P47738;Q3U6I3		Q9EQT6	Q91V55;P97461;D3YYM6	O08795-2;Q3U518;O08795;Q3TWG2	B1GX80;B1GX81;Q61036-2;Q61036;A3KGC5	Q3ULN6;Q8R127;J3QNN5	D3YUP1;Q9WVG6-2;Q9WVG6	B2RY22;A0A087WS18;J3QP81;A5D6Q8;A0A087WRK0;A0A087WQF1;E9Q6L0;A0A087WQ95;A0A087WNW8;A0A087WP42;E9QNY9;A0A087WRE8;E9QKH0;A0A087WQ31;Q80TV8-2;Q80TV8	Q8C996	P47867	A0A067XG53;B9EJ23;B7ZP42;O70589-3;O70589-4;O70589-5;O70589;O70589-2
	P27546-2;P27546;P27546-3;E9PZ43	Q63810-2;Q63810	Q6Q477;D1FNM9;Q32ME1;F7AAP4;D1FNM8;H2BL43;E9Q828	Q8VEK0;D3YVV1	Q8C586;T1ECW4;Q9WVB0;Q9WVB0-2;S4R1Y2	P62274	Q8C4G3;Q8C288;Q505G9;A2AQC3;Q6DI68;O70228	Q8BUT2;E9QLL2;Q8BZ98-2;Q8BZ98	Q9JLZ3;F6RT60;F6R307	O54724	Q543Q4;P35276;Q8BP17	Q4FJQ8;Q3UAX2;Q8C562;Q3UC81;Q3UB98;Q3UB54;Q3U841;Q3U784;Q3U5U0;P11152;Q3UCZ2;Q3UCD4;Q3UC44;Q3UBE9;Q3U715;Q3UCH4;Q3U6S8		Q3TMB8;P54822;E9Q242;E9Q3T7	Q8C4Q6;Q8C4Q6-2	Q80TT9;Q8CAL6;Q543P6;A2AVR6;Q8VHQ9;Q3TBG4;F6SS52;E0CYS0;E0CYA0;E0CXP8	A2ALR9;Q3V0C5;Q3V0C5-5;Q3V0C5-2;A2ALR8;Q3V0C5-4;Q3V0C5-3;B7ZNK5	Q3UD67;Q8BGQ7;Q6XMP4	Q3TLP5;Q3TLP5-2;F6YTG0;Q3TLP5-3	Q3UYC0;Q3UYC0-2	Q4VA93;P20444	B2RS41;Q8BWF0		Q8R3G9	Q9CPQ3;Q3UBW3	F8WID5	Q3UID0;Q6PDG5-2;Q6PDG5	Z4YJT3;Q6ZQ58	Q8CJ40;Q8CJ40-3;Q8CJ40-2	Q9D1B9	Q64521;A2AQR0	Q64521;A2AQR0		Q9QXN3-2;Q9QXN3;Q3UJV0;Q3UBZ2	F8WHT3;Q7TPM1;F7AYW2;A2AN33	Q60749	Q80WR0;E9Q3G8;Q80UN3	Q8CGC7	I6L970;Q3TBX5;Q3U3K9;P70295;Q3TAZ9	O88325;O54752	P47867	A2AW05;Q05DR5;Q08943;Q08943-2	Q9D281
	Q5EBI8;Q06185	Q9JKX6	Q9CQU0	F6TBV1;F6WHL0;A2ADH1;Q9CQY5-2;Q9CQY5-3;Q9CQY5	Q80XR5;P26369;Q505Q1;Q922I0;Q3KQM4	A1L367;A1L366;Q61550;Q3UTE4;Q3TG35;Q6ZQJ6	B2RX15;Q6ZPS6	Q80V26	Q5RL79	Q5SZA3;P15864	Q9JIS5	Q9CQ65		Q3UDP0	Q9D7E3	Q542A1;Q61334	Q8C4N0;Q91WR9;Q3TMN9;Q9JJK5;Q6A0E4	P17426-2;P17426	Q8R1E1;E9QL80;Q6A0A4;Q3UZK0;Q91YX5;D3YVK0	O35459;F7B227	Q8K2B3	Q9DAK9		Q6P6M7;Q3U597	Q3TU85;Q61696;Q3TAI8	Q8BKZ9	D3Z3A0;Q9DCL8;Q8BVM6;Q9CT86	Q6P5F9	O35459;F7B227	Q91YT8	Q9DAK9	Q9DAK9		A2AKH7;Q8JZX5;Q9CSK4;Q9D1G5	Q923G3;P47757-2;A2AMW0;P47757-4;Q3TVK4;Q3TRH8;P47757;F7CAZ6	Q91VH6;Q3TWT2	P50396	Q8R1U1;G3UWH9;Q7TSQ9	Q3V3M3;Q78P92;P97376	P97807-2;P97807	Q3V3M3;Q78P92;P97376	Q11011;E9Q039;F6QYF8;E9Q6F4	Q542V3;Q8VE97;Q8K3A8;A2A837
	Q80U93;Q8CHS9	Q569Y6;Q9CZY3;B7ZBY7;E9PY39;Q9CZY3-2	Q4FJQ8;Q3UAX2;Q8C562;Q3UC81;Q3UB98;Q3UB54;Q3U841;Q3U784;Q3U5U0;P11152;Q3UCZ2;Q3UCD4;Q3UC44;Q3UBE9;Q3U715;Q3UCH4;Q3U6S8	Q4FJQ8;Q3UAX2;Q8C562;Q3UC81;Q3UB98;Q3UB54;Q3U841;Q3U784;Q3U5U0;P11152;Q3UCZ2;Q3UCD4;Q3UC44;Q3UBE9;Q3U715;Q3UCH4;Q3U6S8	Q9JMH6-2;Q9JMH6	Q8VCN5	Q9DB29	Q8C4G3;Q8C288;Q505G9;A2AQC3;Q6DI68;O70228	Q921H8;Q3UPU8;H3BJZ9;H3BKL5;Q3TUU3;Q3UKM0;Q8VCH0	P50429;B2RWQ7;P50429-2	D3Z3N4;D3YWT1	A1L340;Q8CGM2		Q5MJS3	Q3TLQ4;P58064	Q8VCH8;Q3UFS2;Q05C23;Q6ZQF6	Q8C1B7-3;Q8C1B7-2;Q8C1B7	A2A9I0;O35166	Q9CWZ7;Q8C1T5;D3Z4B2	Q6ZWQ5;Q3TGS7;Q3V2H3;Q99M52;O70493	Q4VAE8;Q9CQC7;Q9DBH2	Q4VAE8;Q9CQC7;Q9DBH2		A2AKH7;Q8JZX5;Q9CSK4;Q9D1G5	Q925E7;F6RV17	Q9CX34	Q3TV90;Q9CYI4;Q05D11;D3Z765;Q9CYI4-2	Q4W4C9;Q3TVC0;B2L107;P62761	Q8K1J6;Q8K1J6-2	B2RUS7;Q8BNE2;Q6PGE2;Q9Z2P1	P97807-2;P97807	P47867		P56376;Q4VAF0;E9QJT5	Q2TPA8;Q9D015;Q99JH2;B1AX78	Q80XL6;D3YTQ5	Q91VH6;Q3TWT2	Q61686	Q8K131	Q3U2Z6;Q3TDY6;O89023	Q6XPS7;Q9DBC9	Q8BP21;Q545C3;P30285;E9Q9E4;E9PZX7;Q9D193	A2A5Y6;P10637;P10637-6
	D5MCW4;Q9CQ89	D5MCW4;Q9CQ89	Q3UGE9;Q3TTV6;Q9ERA6	Q8BVG4;Q8BVG4-2	Q3UGV7;G5E8R8;Q6P5G6	Q3UMU9;Q3UMU9-3;Q3UMU9-4;Q3UMU9-2	Q5SRX1;Q5SRX1-2;Q5SRX1-3;Q5SRX1-4;Q5SXA5;Q5SXA4;Q5SRX1-5	Q8R1B7;Q8CAN1;Q3UZI9;Q3TBP0;Q64704-2;Q64704;Q64704-6;Q64704-5;Q64704-3	Q80XK7;Q9D2N9	O08553	Q571M4;Q8VC28	D3YWK1;Q80W47		Q9EQT6	Q8C292;Q8C1V4;Q3TIV6;Q99MN1;Q8CFK5	E9PZ87;Q8BJG6;Q505G3;F6TFC9	Q8C1L7;Q9CQR2	Q921N0	D3Z7C0;Q3UKS6;Q9Z2Q5	Q3TD41;Q3UGF2;Q1AJD0;Q5SVQ0-4;Q5SVQ0-2;Q5SVQ0-3;Q5SVQ0	Q99J83	P47867		Q8K354	Q9D104;G5E8T3;Q9CRF7;Q8BZ07;Q9D7A6	P99026	Q6ZWM4	B2RUA5;Q7TSI3	Q8VDG5;Q8VDG5-2	E9PZ00;Q3TXJ0;Q8BFQ1;Q3U8C4;Q3TXP9;Q3TWL8;Q3TWM9;Q3UAS4;Q3U897;Q3U825;Q3U5W2;Q3TWF9;Q3TKB2;Q3TIT5;Q3TID4;K3W4L3;B2RUD7;Q3UFE8;J3QPG5;Q61207;Q3TKK3;Q3UE29	A2AFI8;B9EI38;B1AV20;Q3UHF8;Q80XA6	P97807-2;P97807		E9Q1Q9;P97328;Q9CPP1;D3YVB6	Q8BH04;Q8R3X7;Q3UGF0	B1GX80;B1GX81;Q61036-2;Q61036;A3KGC5	Q60749	Q8C3X8	Q8CG03;Q8BJ62	Q9Z2C9;G3V027;I6L9A6;G3UYB7;G3UYZ2	Q11011;E9Q039;F6QYF8;E9Q6F4	Q6XPS7;Q9DBC9	Q0PD50;Q3UHW5;P55258
	P59266	Q541Z2;Q61239	Q52L66;Q91W67	P51655	Q7TNV0;Q3U4W4;E9Q8Y1;D3YVJ6;Q9CVL7	Q99NF7;Q5BKS2	Q6TEK5;Q0VGU5	E9PXB7;G3X9H8;Q3TQK9;Q8CFI0-3;Q8CFI0;Q641N8;Q8CFI0-2	Q78XF5	Q9QUM9;E0CXB1	A2ASR7;A2ASR8;Q3ULL2;Q2LC58;P25916	Q8BP21;Q545C3;P30285;E9Q9E4;E9PZX7;Q9D193		Q9D927	Q8C1A5	Q3TJD7;B8JJB2;B8JJB3;Q8BVJ7;Q3TJD7-3	E9Q774;E9Q777;Q6ZQ80;Q8BSJ2	Q9D689;Q6P1F5;Q6ZQ77;Q9JKY5;Q80UP1	Q9CQ65	Q91YT8	Q4VBC9;O09111	P97807-2;P97807		Q5MJS3	E0CXZ1;J3QM95;F8WGT4;Q8BYN5-2;Q8BYN5	Q3U3S0;P58404-2;P58404	E9PXM6;A8VP81;Q3TCZ2;Q3UJY1;Q9JIM1-2;Q9JIM1;E9PWY7	D3YTN4;Q99JY3	Q99K86;Q9R069;Q8BGB4	D3YWD8;Q2VWQ2	P47867	A2AFI8;B9EI38;B1AV20;Q3UHF8;Q80XA6		Q8VCF9;Q8BN51;Q9R088	Q3ULL5;Q99L45	Q9CX34	Q3THE7;A7VL18;Q9JLJ2;Q3UDG0;Q3TMT4;Q3V1N7;Q3U367;Q3TG52	Z4YKC4;Q80XI3-2;Q80XI3-4;A2AMI2;Q80XI3;Q80XI3-3;A2AMI7;Q6DI78	Q8VCT0;Q3U8R7;P35951;Q3TVR4;Q3TDD1;Q91ZJ1	Q9D1B9	Q9ESR1;Q540E6;Q921J2	Q9ESR1;Q540E6;Q921J2	Q5EBQ6;P51410;Q5M9J5;D3Z629
	Q3UHL7;E9QN70;B9EKB0;P02469;Q9CRX6;Q8K271	D3Z600;O09012-2;O09012	Q9D3B1	Q9JJH1	P31324	Q58EV5;P63158;Q8C7C4;Q8BNM0;Q6P202;Q497Z6;Q8BQ02;Q3UBK2;Q3UJK0;D3YZ18	P62869	Q5SRX1;Q5SRX1-2;Q5SRX1-3;Q5SRX1-4;Q5SXA5;Q5SXA4;Q5SRX1-5	A3KMF2;Q5DTZ3;G3X8R8;P59759	Q9D2U5-2;Q9D2U5	B5B2P6;B5B2Q2;B5B2P7;Q60591-4;Q60591-2;Q60591;B5B2P8;B5B2Q4;Q3TTU8;B5B2Q6;A2AQC8;B5B2R5;Q8C443;Q6P3F6	Q543Q4;P35276;Q8BP17		Q8C996	A2ASS6;E9Q8N1;E9Q8K5;A2ASS6-2	B2RUC7;Q9Z1Z2	A2AIX1;E9QAT4;Q811L5;Q80U43;F7BPW6	Q8BTJ4-2;Q8BTJ4	Q8K131	Q3UNZ8;Q3UNZ8-2	P70704-2;A1L332;F6WYQ5;P70704-3;Q5DTG0;P70704;Q8CA15;Q52KQ7	Q4VBC9;O09111		Q9EQT6	Q6ZWM4	Q3TJZ6;Q8BL36	Q8BV13;Q3TDL0	Q9Z0W3;Q9Z0W3-2	I6L970;Q3TBX5;Q3U3K9;P70295;Q3TAZ9	Q9CQU0	Q6XPS7;Q9DBC9	Q6XPS7;Q9DBC9		Q9QWR8	Q3UM23;Q91VI7	Q3UWG5;P35762	Q3UWG5;P35762	Q8R4H9;Q9JKN2;Q8C2T4;Q05C53	O35459;F7B227	Q8C996	Q8BP21;Q545C3;P30285;E9Q9E4;E9PZX7;Q9D193	Q9Z2C9;G3V027;I6L9A6;G3UYB7;G3UYZ2	Q80XR5;P26369;Q505Q1;Q922I0;Q3KQM4
	K3W4Q9;Q8BH60-2;Q8BH60	A0PK78;Q78PG9	Q9JJH1	Q2M3X8-4;Q2M3X8;Q2M3X8-3;B1B1B8;Q2M3X8-2	Q3UWQ9;Q3UJ70;Q8JZK9;Q8K0I5	Q3TUI3;Q8K2F0;Q05DR7;Q4G5Y4;Q5CCJ9;Q8K2F0-2;A2AKA9;Q53TY6	P97401	Q8R015;Q3TB02;Q8R015-2	Q91WT9-2;Q91WT9	Q99LX0;A2A813;A2A815	D3Z7M5;Q9CPT5	Q549D0;Q3UC80;Q8BT06;P41731		Q8CH02	Q99LC2	Q91WT7	E9PZ87;Q8BJG6	O08915;D3YW40	Q9JL18	D3Z7P3-2	A2BDX3	Q8C0W0		P10649;A2AE89	A2AWN8;P59326;Q3TH60	Q60960	Q544Y8;Q3UC19;Q3TVQ3;Q3U9K2;Q9D2V3;Q3UD85;Q3UAJ3;Q3U9N4;Q3U8W3;Q3TW77;P28798;Q3UDD6;Q3TX66;Q3TWT4;Q3U5Q6	Q8VCS3	Q8VCT0;Q3U8R7;P35951;Q3TVR4;Q3TDD1;Q91ZJ1	Q64521;A2AQR0	Q9CQU0	Q8CG03;Q8BJ62		B2RUS7;Q8BNE2;Q6PGE2;Q9Z2P1	Q91VE6-2;Q91VE6	D3Z0V7;E9QLZ1;P62500-3;P62500;D3YW86;Q3UXU0;P62500-2;H3BLI9;A7LCN1;Q9CVK3;Q6PE86;Q148S0	Q3TC93	Q8QZY1	Q8K1J6;Q8K1J6-2	Q5SSZ5;Q5SSZ5-2	C7G3P2;Q61136;Q8BPG8	Q8VCF9;Q8BN51;Q9R088	Q8K273
	Q3UL22;Q6A0F1;P42932;Q3UKQ2;Q8BVY8;Q9WVS5;H3BL49;Q9CS06	Q4KL81;P63260;Q3TSB7;Q3UD81	Q8BVG4;Q8BVG4-2	Q4VA93;P20444	Q8BH43;Q3T9Z7;Q80UQ8	B7ZWI2;B2RXM7;Q9D1J3	Q8R015;Q3TB02;Q8R015-2	Q149D1;Q8BH55	O54988	Q6P1J1;Q3TXY0;P97427;Q3TY94	Q9R1E6;Q9R1E6-3;G3UXY9;Q9R1E6-2	A0A087WRI8;G5E8E3;Q8R3Y5-2;Q8R3Y5		Q3U9X3;Q91WE2;Q05CB0	Q3U9G2;P20029;Q3TWF2;Q3TKF8;Q3TI47;Q9DC41;Q3U7T8;Q3UEM8	Q2KN98;Q6GQV8;Q8CI53;Q8C9Q9;Q8C714	Q3UM23;Q91VI7	Q9Z1N5;Q3TB18		Q8VCT0;Q3U8R7;P35951;Q3TVR4;Q3TDD1;Q91ZJ1	Q9DAK9	Q8K2B3		Q8VEK0;D3YVV1	Q3UID0;Q6PDG5-2;Q6PDG5	Q6ZWM4	Q3UBP6;Q3UBQ4	Q8BU14;Q9CRY0;Q05DA2	Q9QXY6;Q8R0V6	Q8VCF9;Q8BN51;Q9R088	Q9JKN1	Q9CQU0		Q4FJP2;Q3UJ82;O35309	Q3THE7;A7VL18;Q9JLJ2;Q3UDG0;Q3TMT4;Q3V1N7;Q3U367;Q3TG52	Q3TK27;Q8CI11;Q8CI11-2	Q8K209	A3KGA5;Q61908	Q9CWZ7;Q8C1T5;D3Z4B2	Q9CZS7;Q544E3;O70172;F6RJE8	Q8VCF9;Q8BN51;Q9R088	C7G3P2;Q61136;Q8BPG8	Q9CPY7-2;Q9CPY7
	Q60855;F7D1J2	Q5SWJ8;P60060;G3UWH0	D3YYW8;Q91V81;Q91V81-2	Q3UGE9;Q3TTV6;Q9ERA6	Q8R326-2;Q8R326	A0A087WRY3;Q80XU3	Q6ZWY7;Q9WU28;E9PVG3;E9PZ62	P97401	P62305;E9Q4F4	Q9CR98	Q99K01-2	D3Z5I1;Q3UPF5-2;Q3UPF5;G3X9X5;Q8K302		Q3TN26;Q3TP13;Q544D7;Q60714	Q5EEX1;P01326;E0CXX7	Q8CE80;P51125-3;P51125-2;P51125-6;P51125;Q921U7;Q8C281;P51125-7;Q8CE04;Q8CB83;Q3TTN2;P51125-5;P51125-4	Q5SU48;Q7TN98-4;Q7TN98-5;Q7TN98-3;Q7TN98-2;Q7TN98;Q5SU47;Q9D5G2;Q9D5F3;F6T0J8;A1A562;D3YUJ4;E9Q5X2;E9Q969;Q812E0	Q3TYJ0;Q9WUD1		P97807-2;P97807	D3Z7C0;Q3UKS6;Q9Z2Q5	P56376;Q4VAF0;E9QJT5		P70704-2;A1L332;F6WYQ5;P70704-3;Q5DTG0;P70704;Q8CA15;Q52KQ7	Q3UC02;Q9DB79;P62281;Q9D0P6	Q8K2C6;Q5M8R0	Q8K2C6;Q5M8R0	Q3TJQ2;Q3U866;Q3U399;Q91ZN5-2;Q91ZN5	Q8CG03;Q8BJ62	I6L970;Q3TBX5;Q3U3K9;P70295;Q3TAZ9	Q8CG03;Q8BJ62	Q8BKR5		D3YUP1;Q9WVG6-2;Q9WVG6	Q3U313;Q8VH51-2;Q8VH51;E9Q8F0;Q0VGU9;Q8VH51-3;B7ZD61	B9EKE9;Q3TQX5;Q62167;B7ZWF1;B9EIA2;P16381	Q62084	Q9JK23;D3Z795	Q9CQ65	Q71FD5	E9Q1S3;Q01405;Q8C1E4	E9Q1S3;Q01405;Q8C1E4	Q7TPW6;Q9Z2Z6
	P52946	Q3UL22;Q6A0F1;P42932;Q3UKQ2;Q8BVY8;Q9WVS5;H3BL49;Q9CS06	Q3TMH2	Q3TBG7;P21570	D3YZ20;Q6PI63;O08740;Q3TYI2	Q8C0Z3;Q8CFF2;Q8CGI3;Q9CT17;Q6NSR2;Q3UIX4;E9Q6E5;D3Z4B0;B7ZNC5;Q8BV04	Q8BUT2;E9QLL2;Q8BZ98-2;Q8BZ98	Q3V169;A2N6K9;E9Q046;O35706;L7N265;D3Z452;Q62183;E9Q2X0;Q99206;Q8C5S9;Q80YU2;Q80W76;Q62184;O35703;E9PYJ0;B2RUN1;Q8C641	Q3UWQ9;Q3UJ70;Q8JZK9;Q8K0I5	Q60930;G3UX26;D3YZT5	P58022-2;P58022	Q3TKN7;Q8JZY2;Q3UTM6		Q8VEK0;D3YVV1	Q99LB6	Q9EQU5-2;A2BE93;Q3T9S3;Q9EQU5;A2BE92;Q5U445;Q9EQU5-3	O70305-2;E9QM77;O70305;O70305-3;F6U2C2;Q3UX07;F7B6X4;Q3UX51	O35841;Q3UYQ4		Q9D020-1;Q9D020	P97807-2;P97807	Q543M3;Q3UHZ4;Q3U5U9;Q3TT75;P06797;Q3UWH6;Q9D0C0;Q3TVJ1;Q3TNC8		Q8BK48	Q4FZG2;Q545P3;P46656;Q3UG56	Q8BV13;Q3TDL0	O88952;Q3TTY6;Q3TS99	P04627;Q3UXR0;Q3TQI2;E9Q0P8	Q8R1E1;E9QL80;Q6A0A4;Q3UZK0;Q91YX5;D3YVK0	Q543F6;P49615	Q8BKR5	Q9D020-1;Q9D020		D3YXH0;P63054	P16546	Q9R099;Q9CY49	Q3TK27;Q8CI11;Q8CI11-2	Q9D8V0;Q9D8V0-3	Q9JL18	P70704-2;A1L332;F6WYQ5;P70704-3;Q5DTG0;P70704;Q8CA15;Q52KQ7	Q922A2;Q3TJ49;Q07076;Q3UYL7;Q8BP75;Q8CCV9	Q9DAU1;Q9DAU1-2	Q6ZPS0
	Q63810-2;Q63810	Q00PI9	Q8K3X4	D3YWK1;Q80W47	Q9DCL9	Q9D0L8;Q9D0L8-2;Q9D0L8-3;D3YYS7;D3Z478	Q8CH02	Q5F1Z8;Q60648	Q545X8;P62702;Q3UXQ6;Q545F8	Q3UYH7;Q8BVT9	P62869	Q6PDI6;Q6PDI6-3		E9Q7N5;Q8R2Q4-3;Q8R2Q4-2;Q8R2Q4;Q3TML3;Q3TSU6;Q8C1C2	Q8C1L7;Q9CQR2	Q3UC10;Q3ULG5;Q542I2;P97311;Q8C5L1	Q9CY58;Q3UJK2;Q9CY58-2;Q3UMP4;Q3UEI6;Q9CY58-3;Q3V274;Q9CY58-4	Q3THX4;P97390		Q9DB73;G3UZG6;Q9DB73-2	P47867	D3Z7C0;Q3UKS6;Q9Z2Q5		Q7TN29;Q7TN29-2	P61965;Q3UNQ3;F6Q3W0	P55937-1;P55937	Q9CX34	Q6P289;Q571M5;Q8C863;Q8C863-2	Q9CWZ7;Q8C1T5;D3Z4B2	Q9EQT6	Q9D020-1;Q9D020	I6L970;Q3TBX5;Q3U3K9;P70295;Q3TAZ9		C7G3P2;Q61136;Q8BPG8	Q4FZE6;P62082;F6SVV1	Q3TC93	Q9CX34	F8VQE9;Q8VHH5;Q8VHH5-2;Q8BV81		Q3UC67;Q8JZR0;Q3UKS0	Q9Z2C9;G3V027;I6L9A6;G3UYB7;G3UYZ2	Q922A2;Q3TJ49;Q07076;Q3UYL7;Q8BP75;Q8CCV9	P62204;Q3UKW2;Q9D6P8
	D3Z600;O09012-2;O09012	E0CYX9;Q3TC33;E0CYP1;Q3TC33-2	P51655	Q9D4H1;Q8K2J3	F8WIX8;B2RWH3;Q6GSS7;Q149V4;Q64523	Q8CCI5	Q3V169;A2N6K9;E9Q046;O35706;L7N265;D3Z452;Q62183;E9Q2X0;Q99206;Q8C5S9;Q80YU2;Q80W76;Q62184;O35703;E9PYJ0;B2RUN1;Q8C641	B5B2P6;B5B2Q2;B5B2P7;Q60591-4;Q60591-2;Q60591;B5B2P8;B5B2Q4;Q3TTU8;B5B2Q6;A2AQC8;B5B2R5;Q8C443;Q6P3F6	Q5FWX7;Z4YJX3;Q8VDM5;Q8R0G3;E9Q6C1;F6UHR6;E9PXZ2;A2A8Z1-2;A2A8Z1	Q3TFA9;Q9JHJ0;Q8C3Z3	Q496X5;Q3UW05;P10601	Q80V26		P70704-2;A1L332;F6WYQ5;P70704-3;Q5DTG0;P70704;Q8CA15;Q52KQ7	Q3U3S0;P58404-2;P58404	E9Q7B0;Q60715-2;Q3TTT2;Q3TN84;Q60715;Q3UF16	A2A7Z4;Q78IG7;Q9CQH7	Q3TGF2		Q9CRB9;Q91VG6	Q543M3;Q3UHZ4;Q3U5U9;Q3TT75;P06797;Q3UWH6;Q9D0C0;Q3TVJ1;Q3TNC8	A2BDX3		Q543M3;Q3UHZ4;Q3U5U9;Q3TT75;P06797;Q3UWH6;Q9D0C0;Q3TVJ1;Q3TNC8	Q642K1;Q58EW0;P35980;Q0QEW9;G3UZJ6;G3UZK4	Q544Y8;Q3UC19;Q3TVQ3;Q3U9K2;Q9D2V3;Q3UD85;Q3UAJ3;Q3U9N4;Q3U8W3;Q3TW77;P28798;Q3UDD6;Q3TX66;Q3TWT4;Q3U5Q6	Q60960	Q9CXW4;E9PYL9;Q8VC94;A2BH06	Q9CQ65	P97807-2;P97807	Q4FJP2;Q3UJ82;O35309	Q8VCT0;Q3U8R7;P35951;Q3TVR4;Q3TDD1;Q91ZJ1		Q9CZ62-2;Q9CZ62;Q8C1I9	Q8BK29;B1AT82;Q9D0M1;B1AT83	P08030	Q9R099;Q9CY49	P70302		I6L970;Q3TBX5;Q3U3K9;P70295;Q3TAZ9	Q9DAU1;Q9DAU1-2	S4R1W1	B2RQC6;E9QAI5;G3UWN2;B2RQC6-2;Q6P9L1
	B0FTY3;Q8R1N4;Q8R1N4-2;Q8R1N4-3	D3Z041;P41216	A2AFI8;B9EI38;B1AV20;Q3UHF8;Q80XA6	D3Z7E5;Q2NL51	Q91VH6;Q3TWT2	Q9CS68;Q9WV84;Q9D0C5	Q80TJ1-2;K4DI76;J3QJW3;Q80TJ1-4;Q80TJ1	P28028	P62717;Q3THJ0	A0A087WRE5;Q6P3D0	Q9D8N2;Q3TH34	Q571M4;Q8VC28		A3KN68	Q80YU9;A2AN96;O88851	Q8C4N0;Q91WR9;Q3TMN9;Q9JJK5;Q6A0E4	Q6ZWZ7;Q9CPR4;Q505B1;Q80V08;Q6PHZ1	H3BKM2;Q3TI64;Q80YV2;D3Z3D0;Q80YV2-2		Q3UC67;Q8JZR0;Q3UKS0	P56376;Q4VAF0;E9QJT5	Q8BKR5		Q99KI0	A2ALR9;Q3V0C5;Q3V0C5-5;Q3V0C5-2;A2ALR8;Q3V0C5-4;Q3V0C5-3;B7ZNK5	Q6WVG3;Q69ZA6	Q9CZ30;Q3TW21;Q3TJF2;B1AYJ9;Q9CZ30-2	Q64332	Q9JL18	P70704-2;A1L332;F6WYQ5;P70704-3;Q5DTG0;P70704;Q8CA15;Q52KQ7	Q8VCT0;Q3U8R7;P35951;Q3TVR4;Q3TDD1;Q91ZJ1	Q4FJP2;Q3UJ82;O35309		Q14BZ3;P70202	E9Q1P8	Q8R2Y2;Q8R2Y2-2	Q99LC2	Q3UE40;P27601		Q8VCF9;Q8BN51;Q9R088	Q3TD41;Q3UGF2;Q1AJD0;Q5SVQ0-4;Q5SVQ0-2;Q5SVQ0-3;Q5SVQ0	Q8CBY0	Q8K0M3;Q9R1Z8
	D3Z6P0-2;D3Z6P0	Q3U0S4;Q7TSG2	Q6PHU5;Q6PHU5-2	Q8C996	Q99LB6	Q543K9;P23492	Q80V26	Q5SQX6;F6QD74;Q6PGK0	Q58E64;Q3UA81;P10126;Q3TII3;D3YZ68;D3Z3I8	Q5EBG8	Q64471;Q9DCY6;D3Z3X5	P56376;Q4VAF0;E9QJT5		P97384;D3Z7U0	Q545N8;Q9Z2M7;Q9D1M5;Q9DCE3;Q9CZE9	O35295;Q8BQK8;Q3UTJ8;Q8R4E6-2	Q5D098;P70195	A2RS58;P47941		B2RY22;A0A087WS18;J3QP81;A5D6Q8;A0A087WRK0;A0A087WQF1;E9Q6L0;A0A087WQ95;A0A087WNW8;A0A087WP42;E9QNY9;A0A087WRE8;E9QKH0;A0A087WQ31;Q80TV8-2;Q80TV8	Q8K3X4	Q8K3X4		D3YXH0;P63054	Q5U452;Q99PW4	Q8K1Z0;F6SFF5	Q8R2K1;D3YWS7;F6SJM7;Q8R2K1-2;Q8R2K1-3;Q8R2K1-5;Q8R2K1-4;F6X9P4	P21981		D3YUP1;Q9WVG6-2;Q9WVG6	I6L970;Q3TBX5;Q3U3K9;P70295;Q3TAZ9	Q9JKN1		Q8BP21;Q545C3;P30285;E9Q9E4;E9PZX7;Q9D193	E9QN44;Q8CIM3	Q8K209	Q5U452;Q99PW4	E9Q9N6;E9PYX3;F6ZS70;E9QMP6;Q05512-3;Q05512-4;Q05512;Q3T9A3;Q571J8;Q05512-2;Q3U3A1		Q9CXS4	S4R1W1	Q9EQT6	Q3TE95;Q8BP92
	Q923G3;P47757-2;A2AMW0;P47757-4;Q3TVK4;Q3TRH8;P47757;F7CAZ6	Q6NXW0;Q9WUA6-2;Q9WUA6;Q8C6X4	A2AKH7;Q8JZX5;Q9CSK4;Q9D1G5	Q8BH01-3;Q8BH01-2;Q8BH01	Q3UMF0-3;B1AZ15;B1AZ14;Q3UMF0-4;Q3UMF0-2;Q3UMF0	Q2UZW7;Q6PER3	Q9CR39;F7AZP7	Q8QZW3	B2M1R7;Q61990;Q61990-3;Q3TF69	Q64737;Q3UJP8;Q3TH49;Q64737-2	D3Z5I1;Q3UPF5-2;Q3UPF5;G3X9X5;Q8K302	Q3ULP3;Q3TX60;Q62172		Q4VBC9;O09111	A2A7Z4;Q78IG7;Q9CQH7	R4H4V1;R4H4Y7;Q9EQC5;B0LAE0	E9QKT0;Q63943-2;Q921S6;Q63943;Q3URR2;E9Q5E0	Q8C1X9;Q3U737;O35639;Q3TFK4;Q3TET3		P70704-2;A1L332;F6WYQ5;P70704-3;Q5DTG0;P70704;Q8CA15;Q52KQ7	Q91V76	Q8CIH9;Q3TUW2;Q3UGA8;Q3TKC5;Q3UGU3		Q8BP21;Q545C3;P30285;E9Q9E4;E9PZX7;Q9D193	Q9D1P4	Q4FK54;P61290;A2A4J1	Q3TJZ6;Q8BL36	Q3U868;Q921K2;Q3TX36;Q3TM68;Q3TIV3;Q3TF18;Q3UJ03;P11103		Q3TD41;Q3UGF2;Q1AJD0;Q5SVQ0-4;Q5SVQ0-2;Q5SVQ0-3;Q5SVQ0	Q922A2;Q3TJ49;Q07076;Q3UYL7;Q8BP75;Q8CCV9	Q6NSU3		Q8R3N6;Q3UTN0	Q14AI7;O88544;D3YV99;F6QTS1;D3Z1R9	Q62084	P08030	B1AZ42;B1AZ39;P0C0A3;B1AZ41;Q3TS10		Q6XPS7;Q9DBC9	Q9EQT6	Q3TD41;Q3UGF2;Q1AJD0;Q5SVQ0-4;Q5SVQ0-2;Q5SVQ0-3;Q5SVQ0	Q8C6B0;Q5K4Q9;Q1XG79;Q9D7S5;Q76I24;Q5I0W6
	Q9CQB4;Q9D855	Q6ZWZ6;P63323	Q9DAK9	A2AFI8;B9EI38;B1AV20;Q3UHF8;Q80XA6	O88845;Q3TR91;O88845-3	P59266	Q5F1Z8;Q60648	Q5M9K1;P07309;Q9D6A4	Q91YN2;Q03963	Q91VM2;P62320	A1L340;Q8CGM2	Q544T7;P45700		C7G3P2;Q61136;Q8BPG8	Q5M9N8;Q3UBI6;P14148;Q3TK73;F6XI62	E9Q512;H3BJG4;Q8BVJ9;Q811I5;Q9CRV3;H3BJH8	Q0VBU4;Q9D024-2;Q9D024;F7C265;Q9D024-3	Q9CRY7		Q6XPS7;Q9DBC9	Q8BKR5	Q9CQU0		C7G3P2;Q61136;Q8BPG8	Q58DZ3;P62889;Q497D7;Q5PR15	O88952;Q3TTY6;Q3TS99	Q9D2R6;E9Q6W2	Q4FJL0;P61027;Q3U621		Q9CXS4	Q9D0A3	Q9D0A3		Q3U661;Q6A006;Q8BU11;Q3UVQ1;H3BL89;Q66JW3;Q80W03	E0CXZ1;J3QM95;F8WGT4;Q8BYN5-2;Q8BYN5	Q5U452;Q99PW4	Q3TQY2;Q8CBY8-2;Q8CBY8	O70305-2;E9QM77;O70305;O70305-3;F6U2C2;Q3UX07;F7B6X4;Q3UX51		Q9DAU1;Q9DAU1-2	D3YXJ5	Q9CZS7;Q544E3;O70172;F6RJE8	P32020;P32020-2
	Q642L7;P62983;A5JUZ1;E9Q9J0;Q8C2K3;E9Q5F6;Q922B0;Q5SX22;Q3TH47;Q78XY9;Q6NZC5;Q8R0Z9;Q922Z8;Q8VC46;P0CG49;P0CG50	P51859;E0CXA0	Q8C996	Q3UM57;Q6ZQ73	Q3UJR8;Q64152-2;Q64152	Q03517	Q8QZW3	Q3U8P8;Q3URU8;B1ASP2;P52332;Q8K0I7	Q3TRJ7;Q62419;Q3U3C4	Q9DCD8;Q58EV4;O70435;Q3TEL1;E0CX62	P97807-2;P97807	Q8R1J9;H3BK73;P0C7W3;Q8BT54		A9E3L2;Q9Z2I2;Q80YE1;Q810R7	Q3THQ5;Q60864	Q3U0D7;P62331;Q3TKZ2	Q6ZPS0	P81117		Q9CQ10	Q8C0W0	Q91V76		Q8C6F3;G5E897	Q545G0;Q9R1P1	D3Z3A0;Q9DCL8;Q8BVM6;Q9CT86	Q6WVG3;Q69ZA6	Q8CIM8;Q8CIM8-2		E9Q1S3;Q01405;Q8C1E4	Q6NSU3	Q922A2;Q3TJ49;Q07076;Q3UYL7;Q8BP75;Q8CCV9		P97807-2;P97807	Q91ZP9;Q3B7X9;Q3B7Y0;Q91ZP9-2;D3Z103	Q99LC2	Q91ZP9;Q3B7X9;Q3B7Y0;Q91ZP9-2;D3Z103	A0A087WQS0;A0A087WQM0;E9Q0S6;A0A087WRU0;A0A087WQ94;Q3U0Q9;Q7TSV1		Q91YT8	Q9CZS7;Q544E3;O70172;F6RJE8	D3YX15;Q61153;D6RDQ6	Q3U8F5;Q9D8W5;B1AT36;Q3TRH2
	Q8C671;Q62093	Q8C671;Q62093	Q8BH01-3;Q8BH01-2;Q8BH01	A9E3L2;Q9Z2I2;Q80YE1;Q810R7	Q3U0V1	Q8VDM6-2;Q8VDM6	Q149D1;Q8BH55	Q8R409;Q8VDF7	E9Q3I8;E9Q3I9;E9Q3I4;E9Q3I5;E9Q0N0;Q9Z0R4-2;Q9Z0R4;Q3TUF4	Q8C1L7;Q9CQR2	Q99KR3	Q50HX4;Q50HX2;Q91V41;Q50HX0;Q50HX3;Q50HX1;A2AL34;Q50HW9		Q91YT8	Q9Z204-2;Q9Z204-4;Q9Z204-3	A2AIX1;E9QAT4;Q811L5;Q80U43;F7BPW6;Q8K000;Q8R336;Q3TRA8;Q3TZR0	Q3U0D7;P62331	Q9CQW1		Q64521;A2AQR0	Q3URS9-2;Q3URS9	Q5MJS3		B2RPS1;Q0PD56;P61021;Q8C458	Q4VA29;Q9CQE8;J3QNB0	Q61171;Q5M9N9;D3Z4A4	Q6RI64;O09061	Q9D0R2;Q3U630		O35459;F7B227	S4R1W1	S4R1W1		Q3TLP5;Q3TLP5-2;F6YTG0;Q3TLP5-3	Q80Y09	Q8R1Q3	Q544Y8;Q3UC19;Q3TVQ3;Q3U9K2;Q9D2V3;Q3UD85;Q3UAJ3;Q3U9N4;Q3U8W3;Q3TW77;P28798;Q3UDD6;Q3TX66;Q3TWT4;Q3U5Q6	Q8BTX6;Q9CZU3;Q91YT4;Q6ZQK1;Q8BVI7		Q0P6I6	Q9DAK9	D3YXJ5	Q4V9Z5-3;Q4V9Z5-2;Q4V9Z5
	P97449;Q3UP74;Q3TB69	Q543Y7;Q61644;Q3TYF2	Q9ESR1;Q540E6;Q921J2	Q91YT8	Q8BT60;Q3UJS6	Q6P5C5;Q3T9H8	Q5M9K1;P07309;Q9D6A4	Q6ZWY7;Q9WU28;E9PVG3;E9PZ62	Q3TZ17;O70400;S4R1V0	Q3UMF0-3;B1AZ15;B1AZ14;Q3UMF0-4;Q3UMF0-2;Q3UMF0	Q8R3P6;Q8R3P6-2	Q80XN0;D3Z2Y8		Q8C0W0	P27773	Q91WT9-2;Q91WT9;D3YYN0;D3YUF2;D3Z4K2	Q6PDC2;Q9CZL0;Q3TFU8;Q99KF1;Q3U7N8;Q8BLM5	B7ZN44;A5CVE4;I1E4X8;B2RQE3;P83093;Q8BIM2;F6WBP9		D3YU12;Q8K2T1;G5E8S7;Q8K2T1-2	Q8CIH9;Q3TUW2;Q3UGA8;Q3TKC5;Q3UGU3	Q9D020-1;Q9D020		Q99J83	Q9CYA0	Q3TV90;Q9CYI4;Q05D11;D3Z765;Q9CYI4-2	P70460	Q4FK49;Q9D819;Q8BTY3;Q3UA53		Q9DAK9	Q9R0M7;Q91X42	Q9R0M7;Q91X42		Q9DAK9	Q3TVW1;Q8R1X6;D3Z3F8;Q8R1X6-2	Q544Y8;Q3UC19;Q3TVQ3;Q3U9K2;Q9D2V3;Q3UD85;Q3UAJ3;Q3U9N4;Q3U8W3;Q3TW77;P28798;Q3UDD6;Q3TX66;Q3TWT4;Q3U5Q6	Q8R2Y2;Q8R2Y2-2	Q9D3B1		Q9DB15	Q8CBY0	P17156;B7U582	Q91V38;Q3UAD6;P08113;Q3UBU0;Q3TUD6;Q8CCY5;F7C312
	D3Z041;P41216	H3BIW0;G3X8T2;Q0P678	Q52L50;Q99JI6	Q6PHU5;Q6PHU5-2	A5GZX3;Q9CPU0	Q6P3A8;Q6P3A8-2	Q8R1B7;Q8CAN1;Q3UZI9;Q3TBP0;Q64704-2;Q64704;Q64704-6;Q64704-5;Q64704-3	Q9CR39;F7AZP7	B9EHZ5;Q9JLB0-2;Q3UN60;Q9JLB0;Q6NSS8;Q811G2	Q9WV96;D6RG99;D3YVK5;D3YVK4	B2RWW6;Q3UHQ5;E9PVA8;Q8CHH7;Q6PGM5	P62869		Q3UKP5;Q9DCD2	Q3U8F7;Q3U3C2;Q9Z0J0;Q3TXQ4	Q547R0;E9QAT0;Q6AXB7;P35922-3;P35922-2;P35922;D3Z6U8;E9QNF5;E9QAS8;P35922-9;P35922-8;P35922-7;E9QAS9;P35922-5;P35922-4;P35922-6;P35922-11;P35922-10;P35922-12;Q8BPK8;Q8BPN5;Q925S6	Q0PD50;Q3UHW5;P55258	Q3U4H0;Q61166		Q9D1B9	Q3UNZ8;Q3UNZ8-2	Q6XPS7;Q9DBC9		Q544B1;Q3UJW1;Q3U9J7;Q3TVM2;P47738;Q3U6I3	Q9D6F9	P70460	Q3TJD7	Q3TW51;Q78PY7;Q3UZI3;Q3TRW3		Q9CQ10	Q3TMH2	Q3TMH2		D3YXJ5	Q3TUF3;O35887;Q3UG11;Q3TQD1;G3UWV3;G3UWR0;G3UY49	Q4FZG2;Q545P3;P46656;Q3UG56	B9EKE9;Q3TQX5;Q62167;B7ZWF1;B9EIA2;P16381	Q8K2I1;D3YWJ4		B2RRX2;P63328-2;P63328;Q4V9X0	Q71FD5	Q9D020-1;Q9D020	Q2KN98;Q6GQV8;Q8CI53;Q8C9Q9
	Q9JKX6	Q9D172	D3Z7E5;Q2NL51	Q4FK38;Q3UDJ2;Q8R0X7;Q69ZN1;D6REF7	Q8CI08	Q8C476;Q543C2;Q99PM9	D3YWK1;Q80W47	P48036	E9Q8I9;E9Q8I9-2	Q9JIA1	Q8BP21;Q545C3;P30285;E9Q9E4;E9PZX7;Q9D193	Q6P1F1;E9Q6B6;E9Q6E0;Q8CHB5;Q6NV54;Q3UHB5;J3QNR6;K3W4S4;Q9ESN9-2;Q9ESN9-3;Q9ESN9-5;Q9ESN9-4;Q9ESN9;Q9ESN9-6		Q8K3X4	Q9EQC8;Q05CA9	Q3UH60;D3Z5G8;Q3UH60-2	Q2KN98;Q6GQV8;Q8CI53;Q8C9Q9	Q99K99		Q3U2Z6;Q3TDY6;O89023	Q9CQU0	Q6ZWQ5;Q3TGS7;Q3V2H3;Q99M52;O70493		Q9DAK9	Q64374	Q9D2R6;E9Q6W2	Q4FK54;P61290;A2A4J1	Q3UGY8		Q9JKN1	Q9QXN3-2;Q9QXN3;Q3UJV0;Q3UBZ2	P24638;Q3UZN1;Q3U4F3		Q9D020-1;Q9D020	A0A087WNP6;Q4VAA2-2;Q4VAA2;A0A087WRM0	Q91ZP9;Q3B7X9;Q3B7Y0;Q91ZP9-2;D3Z103	Q4FZG2;Q545P3;P46656;Q3UG56	G5E8C4;Q8BRH0		Q922A2;Q3TJ49;Q07076;Q3UYL7;Q8BP75;Q8CCV9	D3YX15;Q61153;D6RDQ6	Q9DAK9	Q3UHY8;P61222;Q6NXX7;Q3TJM9;Q3TIU8
	Q3UGV7;G5E8R8;Q6P5G6	Q60855;F7D1J2	Q91YT8	A2AKH7;Q8JZX5;Q9CSK4;Q9D1G5	Q3U484;Q62095	Q6P1J1;Q3TXY0;P97427;Q3TY94	P28028	D3YWK1;Q80W47	P97823;J3QK48;J3QP56;P97823-2;Q4FK51;D3Z111;D3Z269;D3YUG4	Q9JKF6	Q6ZWY7;Q9WU28;E9PVG3;E9PZ62	Q0PD63;P63011		A2ASR7;A2ASR8;Q3ULL2;Q2LC58;P25916	Q9D1R9	Q8VDC3;P28271	E9Q2B2;Q5PRE9;Q5RIM6;Q60974-2;Q60974;F7C134;Q8VDE8;E9Q9Y2;Q8CHB6	B9EJ97;A2AG68;Q64430		Q4VAE8;Q9CQC7;Q9DBH2	Q5MJS3	Q3URS9-2;Q3URS9		Q8R1E1;E9QL80;Q6A0A4;Q3UZK0;Q91YX5;D3YVK0	I7HLV2;Q3THJ6;Q6ZWV3;P86048	Q6RI64;O09061	Q9CQU1	Q91YT7;Q3UNH5		Q8BGX2	P24638;Q3UZN1;Q3U4F3	Q9QXN3-2;Q9QXN3;Q3UJV0;Q3UBZ2		Q3V169;A2N6K9;E9Q046;O35706;L7N265;D3Z452;Q62183;E9Q2X0;Q99206;Q8C5S9;Q80YU2;Q80W76;Q62184;O35703;E9PYJ0;B2RUN1;Q8C641	P55095;A2AS86	B2RTM0;P62806	Q8R1Q3	Q91VM9;D3Z636		Q9DAK9	Q9D020-1;Q9D020	O35459;F7B227	Q8VBZ3
	Q5RKP4;Q91YQ5;Q8BMR3;Q3U900;Q99LY0	P54775;Q569X4;Q3TFA5;Q8BKU2;Q3TJ97;Q3UBF0;Q52L53	Q3UM57;Q6ZQ73	Q8VDQ8;Q8VDQ8-2;Q3UJK6;Q8VDQ8-3;Q8VDQ8-4	Q6P5C5;Q3T9H8	Q3U3S0;P58404-2;P58404	Q8R409;Q8VDF7	Q9Z2C9;G3V027;I6L9A6;G3UYB7;G3UYZ2	G3X9M0;Q9ER88;Q9ER88-2	Q542M2;P61924;Q8R3M1	Q3TMH2	S4R225;Q8K412;Q32P16;Q91V09		Q8R0F3;E9Q265;E9Q0Z7	P61164	Q9D8U3;Q9D8Q5	Q6PGC1	Q3U1V3;Q99MK8;Q7TS64;E9PW16		Q3TCD4;Q9WUR2-2;Q9WUR2;E9PYC6;E9Q858;E9PUY9;E9PYA9;E9PVM6;E9Q7A8	Q6ZWQ5;Q3TGS7;Q3V2H3;Q99M52;O70493	Q9DB15		Q3TMB8;P54822;E9Q242;E9Q3T7	Q6PGL7;Q6PGL7-2;Q8BRP9	Q8R2K1;D3YWS7;F6SJM7;Q8R2K1-2;Q8R2K1-3;Q8R2K1-5;Q8R2K1-4;F6X9P4	Q3UWG5;P35762	Q3UVI9;Q99LE6		Q9DB15	Q71FD5	Q8C0W0		I6L970;Q3TBX5;Q3U3K9;P70295;Q3TAZ9	Q9DCM0	Q8VIJ6;Q3TZL2	Q99KF5;P00493	B1ATP7;Q3U0M8;Q80Y81-2;Q80Y81		E9Q1S3;Q01405;Q8C1E4	Q8BGX2	Q71FD5	Q80TT9;Q8CAL6;Q543P6;A2AVR6;Q8VHQ9
	M4TKR7;P15208	M4TKR7;P15208	Q2TBE6	Q9ESR1;Q540E6;Q921J2	Q9CWK0;Q9CR57	Q3UN47;O08600	B5B2P6;B5B2Q2;B5B2P7;Q60591-4;Q60591-2;Q60591;B5B2P8;B5B2Q4;Q3TTU8;B5B2Q6;A2AQC8;B5B2R5;Q8C443;Q6P3F6	P47867	P12787	Q8C6E3;Q542K4;Q3UZE7;Q3TVZ1;P24270;Q3UF58;Q91XI2	Q543R4;Q00493	Q9JJH1		Q9JKN1	Q9CQF0	Q545K4;Q3UBJ6;Q3UA13;Q3U818;Q3U740;O55135;Q9R071;A6PWZ2;D6RG53;D6RJJ3;B1AZQ4	Q8R332-2;Q6ZQC2;Q3UZQ6;Q8R332-4;Q8R332-3;Q8R332	Q8C3C9;B1AV77;B1ATI0;P47740;Q99PH3;Q8BQ93;Q99PH4;Q3U7B5;Q8C5J1		Q9DAK9	Q9DB15	Q3UNZ8;Q3UNZ8-2		Q9JKN1	P21619	P50544;B1AR28;Q3UJR6	Q4KL81;P63260;Q3TSB7;Q3UD81	A9E3L2;Q9Z2I2;Q80YE1;Q810R7		Q6XPS7;Q9DBC9	Q9QXY6;Q8R0V6	Q9JL18		Q8CJ40;Q8CJ40-3;Q8CJ40-2	Q91WM1-2;Q91WM1;Q8C5B7	Q61171;Q5M9N9;D3Z4A4	Q9CWW6	Q542A1;Q61334		Q9EQT6	O35459;F7B227	Q8BGX2	F8WGX5;Q6PNC0
	Q58E64;Q3UA81;P10126;Q3TII3;D3YZ68;D3Z3I8	A2A7Z4;Q78IG7;Q9CQH7	Q8VDQ8;Q8VDQ8-2;Q3UJK6;Q8VDQ8-3;Q8VDQ8-4	Q2TBE6	Q9CS68;Q9WV84;Q9D0C5	O88712-2;O88712;O88712-3	Q9Z2C9;G3V027;I6L9A6;G3UYB7;G3UYZ2	Q78P93;Q3U646;Q9WV54;Q3U8A7;Q3TWT5	Q58E49;O09106;D3YYI8	Q3TJY2;O88342;Q3TE06;Q9DC08;Q9DBM8;Q3U136;Q80ZI9;Q3TNK2	D3YWK1;Q80W47	P51863;Q921S5		Q9CQU0	Q14AR0;Q9D8T7;F8WHU8;Q9D8T7-2	Q7TQH0-2;Q7TQH0-3;Q7TQH0;Q3TGG2;E9Q5Q0;Q3TYH7;J3QP59	R4H4V1;R4H4Y7;Q9EQC5	Q8BXL7;E9PZK7		Q8BKR5	Q9D020-1;Q9D020	Q8R1K4;Q8R1K4-2;F8WHK6;Q8R1K4-3		Q542R8;O70443;Q3UYF9	E0CY91;E0CYW1;E0CY38;E9QJZ1;E0CZB3;Q9EPV8	Q64374	Q3UMF0-3;B1AZ15;B1AZ14;Q3UMF0-4;Q3UMF0-2;Q3UMF0	Q3UK41;Q8BG30		Q71FD5	Q8R1K4;Q8R1K4-2;F8WHK6;Q8R1K4-3	Q9QXY6;Q8R0V6		Q3TMH2	Q6P6I7;A2AL12;Q5FB19;Q3UZG3;Q8BG05;Q5U3M2	Q03517	Q9Z0Y1;E9Q919	Q6P5D3;Q6P5D3-4;Q6P5D3-2		Q9D020-1;Q9D020	P17156;B7U582	Q8CG03;Q8BJ62	Q68EF0
	Q7TMY2;Q9DBL1;E9Q5L3;Q3V2R9	Q5EBI8;Q06185	Q9R1R8;Q9QYF1;Q9R1R9;Q9R1R5	Q3TMH2	O08553	P42669;Q8C6E9	Q5SQX6;F6QD74;Q6PGK0	Q0PD14;Q8BHC1	P63330;Q8BN07	Q3U484;Q62095	Q5SW83;P61161;Q8BMA4	B5B2P6;B5B2Q2;B5B2P7;Q60591-4;Q60591-2;Q60591;B5B2P8;B5B2Q4;Q3TTU8;B5B2Q6;A2AQC8;B5B2R5;Q8C443;Q6P3F6		P68404-2;P68404	Q99NF7;Q5BKS2	Q99KD6;Q3UDK5;E9PZS8;Q61387;Q3U7R2;F7B257	B2RTG7;E0CYH4;Q8C6G8;F7DFQ2	E9QL65;Q3USH9		Q8BGX2	Q6XPS7;Q9DBC9	P24638;Q3UZN1;Q3U4F3		A2AS45;Q68FH0-2;Q68FH0;A2AS44;Q05D18;Q3UIX3;A2AS47	Q6P1J1;Q3TXY0;P97427;Q3TY94	Q3UWG5;P35762	Q62084	Q9CQ71		C7G3P2;Q61136;Q8BPG8	Q9JL18	Q71FD5		P17156;B7U582	D3Z1F7;Q9DBN4;D3YXF2;Q9DBN4-3;Q9DBN4-2	Q99KF5;P00493	B2RTM0;P62806	Q148V8		C7G3P2;Q61136;Q8BPG8	Q0P6I6	Q0P6I6	Q61733
	Q8VDQ1;Q3TXN1;Q8VDQ1-2	Q3TCN2-2;Q3TCN2	Q8R1K4;Q8R1K4-2;F8WHK6;Q8R1K4-3	Q8K3X4	Q9CWU9	P68372;Q9CVR0;Q9DCR1	Q3U8P8;Q3URU8;B1ASP2;P52332;Q8K0I7	Q8BGE6	Q3U741;Q501J6;Q3TU25;Q501J6-2	Q9DBP5	P15105	Q99KR3		Q9CQ65	Q9JKF6	Q6PGC1;Q3TRV5;Q8BN72	A0MNP4;Q9ERF3;Q8BVQ0;D6RDC7	G3X9J0		Q9QZ06;Q8BQL7;A9JEI5;Q8C5G6	Q8R1K4;Q8R1K4-2;F8WHK6;Q8R1K4-3	D3YWD8;Q2VWQ2		E9Q1Q9;P97328;Q9CPP1;D3YVB6	Q14AQ1;P62334;Q8QZS9	O08795-2;Q3U518;O08795;Q3TWG2	Q64374	C4IXU1;Q80YT7-2		Q9D020-1;Q9D020	Q8C0W0	Q8R1K4;Q8R1K4-2;F8WHK6;Q8R1K4-3		D3YX15;Q61153;D6RDQ6	Q9JKB1;Q8BWQ9	P61022;B0R091	Q03517	B1AVZ0		Q9D1H8	Q9CQ10	Q8R3N6;Q3UTN0	Q3UH60;D3Z5G8;Q3UH60-2
	O08553	F8WI31;Q922V4;D3Z4V1	D3YWK1;Q80W47	Q8R1K4;Q8R1K4-2;F8WHK6;Q8R1K4-3	Q99M46;P97760;Q9DB22;Q3UUX3	Q545K5;O89086;Q8BG13	Q0PD14;Q8BHC1	Q8R1J9;H3BK73;P0C7W3;Q8BT54	P11983;P11983-2	Q3U3H5;Q68FH4;Q8BUU7;Q3U728;Q8BWB2	Q3V384;F6VT60	Q149D1;Q8BH55		Q9D020-1;Q9D020	Q60692	Q4VAA9;Q8BP48;Q8R0B2	Q9JKX6	Q3U6P5;Q9Z204;Q9Z204-5		Q9QXY6;Q8R0V6	D3YWD8;Q2VWQ2	D3YU12;Q8K2T1;G5E8S7;Q8K2T1-2		Q3TJQ2;Q3U866;Q3U399;Q91ZN5-2;Q91ZN5	P30416;F6S2D5;D6RDE2	Q3UMF0-3;B1AZ15;B1AZ14;Q3UMF0-4;Q3UMF0-2;Q3UMF0	P50544;B1AR28;Q3UJR6	Q8BHI7;D3Z0Z6;D3Z136		Q8C0W0	Q3TLP5;Q3TLP5-2;F6YTG0;Q3TLP5-3	Q9CQ65		Q9Z2C9;G3V027;I6L9A6;G3UYB7;G3UYZ2	P56480	Q9CWW6	Q9QZX7-2;Q9QZX7	Q58DZ3;P62889;Q497D7;Q5PR15		Q8C0W0	Q3TMH2	Q9CQ10	Q3UFY7-4;Q3UFY7;Q3UFY7-2
	Q00PI9	Q5RKP4;Q91YQ5;Q8BMR3;Q3U900;Q99LY0	Q3TN26;Q3TP13;Q544D7;Q60714	Q9ME04;Q7JCY6;P03911;W0TGY1;F1JVR2;A9UIX0;Q3UQ59;A0A075DCI1	Q3UID0;Q6PDG5-2;Q6PDG5	Q5DTL0;Q9EQG7;Q5FWJ8	Q8BGE6	Q8BKR5	Q3U9R7;Q3UB84;P47791-2;P47791;Q3UAS7;Q3TXK9;Q3TWI5;Q91Z57	A4FUS1;P14131;Q641N3;Q5CZY9	Q8VEK0;D3YVV1	Q8BTS3		Q8BHN0;Q8BHN0-2	Q8BJF9	B2RTG7;E0CYH4;Q8C6G8;F7DFQ2;F6UT94	Q9D7P6;D3Z7W0;D3Z0K9	O88532;B2RUG7		Q571E4;Q8CC47	P24638;Q3UZN1;Q3U4F3	Q571E4;Q8CC47		Q9ER58;F6SLR4;Q80U51;Q6PAN0	Q8BP79;P53702;G3UXK7	Q9R1P0;Q3TL95;Q3UCF0;E9PW69	D3Z767;Q9D6K7;D3Z1T8;Q9D6K7-2	Q8BH40;O70439;Q9JMJ6;Q9DCE1		Q922A2;Q3TJ49;Q07076;Q3UYL7;Q8BP75;Q8CCV9	Q9CQ65	Q3TLP5;Q3TLP5-2;F6YTG0;Q3TLP5-3		P47867	Q504N0	Q9QZX7-2;Q9QZX7	Q9CQ19	Q8BMK4		Q543F6;P49615	Q8CG03;Q8BJ62	D3YUP1;Q9WVG6-2;Q9WVG6	D3Z780;Q61749;Q61749-2
	Q6NXW0;Q9WUA6-2;Q9WUA6;Q8C6X4	Q0P6B2;Q3TUE1;Q3UUU2;Q91WJ8;Q91WJ8-2;Q3TIS5	F8WIA4;Q8VCZ6	Q9DAK9	Q3U4U6;P80318;E9Q133;Q3U0I3;F6Q609	Q8CE50	P47867	Q8R121;Q8R121-2	Q66JR8	Q78HU3	F8VQ95;Q6Y685;Q6Y685-2	Q3V384;F6VT60		Q8BKR5	Q9R1Q8;Q9D6K2	O55042-2;O55042	P97450;E9QAD6	G5E8J3;Q8K1X1		Q9JKN1	Q9CXS4	Q9CQ65		Q8VCF9;Q8BN51;Q9R088	Q8R238;D3Z0F6	Q4KL81;P63260;Q3TSB7;Q3UD81	D3Z0V7;E9QLZ1;P62500-3;P62500;D3YW86;Q3UXU0;P62500-2;H3BLI9;A7LCN1;Q9CVK3;Q6PE86;Q148S0	Q8C4Y3;Q69ZP4		Q8BKR5	Q571E4;Q8CC47	Q571E4;Q8CC47		Q8CG03;Q8BJ62	P62627;A2AVR9	Q8K1Z0;F6SFF5	Q8BQV7;Q6ZWX1;O55142;Q9DC85	Q8VBT0		Q9CQ10	Q8R3N6;Q3UTN0	I6L970;Q3TBX5;Q3U3K9;P70295;Q3TAZ9	Q6PHQ8;F7A8R0
	Q8C167;Q8BKS6;Q8C167-2;Q8C167-3	Q8C1A5	Q9ME04;Q7JCY6;P03911;W0TGY1;F1JVR2;A9UIX0;Q3UQ59;A0A075DCI1	F8WIA4;Q8VCZ6	Q5F285	Q3UJB0;Q3UAI4;Q80W39;Q3UBH2;Q3UQU5;Q8BL33	Q8BKR5	Q3UEQ1;D3YTM1;E9Q9A0;D3YUD3;D3YUL8;D3Z230	Q544I1;Q8VCV2;Q9QYF9;Q8CBD0	Q3TYX5;L7N466;Q9D110;B2KF83;Q8R1G5	Q60520;Q60520-1	Q9D8N2;Q3TH34		Q102J0;Q8R242;Q8R242-2	G3UXL2;Q9D7G0;Q3TI27;Q3UPD5;Q3UYQ0	Q8BTU4;Q564E6;Q3TG93;P32067;Q9CYB9;F6SXM5;A2AR07;D6RI87	Q4VAA9;Q8BP48;Q8R0B2	Q3U487		Q9D0A3	D3YU12;Q8K2T1;G5E8S7;Q8K2T1-2	Q9R0M7;Q91X42		P70227	Q3U5N4;P54923	B2RRH9;Q3THK7	Q8K1Z0;F6SFF5	Q7TQD5;Q3UGT1;P97742;A8ASF5		Q8VCT0;Q3U8R7;P35951;Q3TVR4;Q3TDD1;Q91ZJ1	Q9CWZ7;Q8C1T5;D3Z4B2	Q3TCD4;Q9WUR2-2;Q9WUR2;E9PYC6;E9Q858;E9PUY9;E9PYA9;E9PVM6;E9Q7A8		Q8BKR5	Q3TV90;Q9CYI4;Q05D11;D3Z765;Q9CYI4-2	Q3TQY2;Q8CBY8-2;Q8CBY8	Q8CHP5;Q8CHP5-2	G3UZ60;G3UWI9;G3UWX9;Q9Z172;G3UZA7;Q9Z172-2		Q8CG03;Q8BJ62	Q3TLP5;Q3TLP5-2;F6YTG0;Q3TLP5-3	Q543F6;P49615	Q8C9S4
	Q8BN32;P29341;Q3U8U8;Q99KL3	Q58E64;Q3UA81;P10126;Q3TII3;D3YZ68;D3Z3I8	Q8C0W0	Q8C0W0	Q544I1;Q8VCV2;Q9QYF9;Q8CBD0	Q8C1A5	Q78P93;Q3U646;Q9WV54;Q3U8A7;Q3TWT5	Q9EP52	Q9CXW2	P54071	Q8R1J9;H3BK73;P0C7W3;Q8BT54	Q6PAC1;P13020-2;Q3UCW8;P13020;Q3U9Q8;Q3TGJ9		Q8R0Q6;Q3UHG5;Q6PDN6;Q62283	Q4FJU3;Q9DCT8	Q9D3U0;B0QZU5	Q3UBB6;Q8CE21;Q3U6W2;Q3UI16;Q3TKZ9;E9Q5C9;Q6ZQK6	Q8C076;P59016		B2RRX2;P63328-2;P63328;Q4V9X0	Q9R0M7;Q91X42	Q3TCD4;Q9WUR2-2;Q9WUR2;E9PYC6;E9Q858;E9PUY9;E9PYA9;E9PVM6;E9Q7A8		Q9CWZ7;Q8C1T5;D3Z4B2	Q6ZWZ6;P63323	Q71LX8;P11499	O08795-2;Q3U518;O08795;Q3TWG2	Q3V2C6;Q3V1K9;P31001		Q9D1H8	Q3TCD4;Q9WUR2-2;Q9WUR2;E9PYC6;E9Q858;E9PUY9;E9PYA9;E9PVM6;E9Q7A8	Q9CWZ7;Q8C1T5;D3Z4B2		Q9CWZ7;Q8C1T5;D3Z4B2	Q3UCC5;Q6P8I4;F8WI88;Q3TM89;Q3KQH9;D3YWA4	Q9CQ19	P61022;B0R091	Q8R5J9		Q9QXY6;Q8R0V6	I6L970;Q3TBX5;Q3U3K9;P70295;Q3TAZ9	Q3TMH2	Q5BKQ9;Q8BG32;Q7TMI0;Q3UWW9;Q497E8;Q8BK73;Q8C0Z6;Q8K2N7
	Q8C1D8	P62196;Q99KR1;Q8K1K2	B0LAE4;Q3UBA1;Q3TQE3;Q8C1Y9;Q80ZW9;Q3TIC7;Q3THR3;Q9JKW0	Q52L50;Q99JI6	Q60932-2;Q3U6K8;Q3TIG8;Q3THL7;Q60932;F2Z471	P57774	Q3TXR9;P20060	Q5EBQ2;P70296;Q3TGC5;D3Z1V4;D6RHS6	Q3U0S4;Q7TSG2	Q564F4;Q3TII0;P80315;Q3UJZ8;G5E839	A0A087WRI8;G5E8E3;Q8R3Y5-2;Q8R3Y5	Q8BK48		Q3THU8;Q8VEM8;G5E902;Q3UB63;Q3U995	Q8R5C5	Q9D1Q6;Q3URM4	Q8BTX5;Q5M9L0;Q3TII2;Q91WK2;Q3THW7;Q3TIK5	Q8C7R4;D3Z061		D3YWD8;Q2VWQ2	Q571E4;Q8CC47	Q9CXS4		Q9QWR8	Q3TET1;Q3UI47;B1AQZ2;P28741;Q80UK1;Q3TSP1;Q3TTS7;Q8CGJ1	F6TCF9;Q60739-2;Q60739;Q9CUY1	Q61171;Q5M9N9;D3Z4A4	Q3UVL4;Q3UVL4-2		Q8CG03;Q8BJ62	D3YU12;Q8K2T1;G5E8S7;Q8K2T1-2	D3YU12;Q8K2T1;G5E8S7;Q8K2T1-2		Q9CQ65	D3Z600;O09012-2;O09012	Q569Z6;Q8BZN7;Q91VL2	Q569Z6;Q8BZN7;Q91VL2	Q5XJY5;Q3U4S9;Q8R1S6;Q3TDU1;Q8C0G7		Q3TD41;Q3UGF2;Q1AJD0;Q5SVQ0-4;Q5SVQ0-2;Q5SVQ0-3;Q5SVQ0	Q9QXY6;Q8R0V6	Q9QXY6;Q8R0V6	Q3UK41;Q8BG30
	Q4KL81;P63260;Q3TSB7;Q3UD81	Q9D3M4;Q91V77;Q9JL08;P56565	Q4FK38;Q3UDJ2;Q8R0X7;Q69ZN1;D6REF7	Q5SUC8;P52624;E9Q5K7	Q8BJF9	Q544Z3;Q99020;Q9D6G1;Q80XR6;Q3TMZ8;Q20BD0	Q8R121;Q8R121-2	Q7TN29;Q7TN29-2	Q3TT51;P12961	Q9CZX8;Q5M9P3;D3YUT3;D3Z722;D3Z5R8;D3YUG3	Q3TLS3	S4R1W1		Q9WTZ1;D3Z497	B7ZP16;H7BWY3;Q3UEG6	E9QKT0;Q63943-2;Q921S6;Q63943;Q3URR2;E9Q5E0;S4R2H4;Q8C895;D3Z6M5;Q3V1B5;Q8CFN5-4;Q8CFN5-3;Q8CFN5-2;Q8CFN5-5;Q8CFN5;Q60929-2;Q60929-3;Q60929	Q8R1V4;Q5SVW9	J3KMG3		Q4VBC9;O09111	Q9D0A3	Q9D0A3		P17156;B7U582	Q76MZ3;Q8C2E1;Q7TMX2	Q9JKB3-2;Q68G78;Q9JKB3;Q61478;Q64369;Q8BPG0	Q3TLI6	Q544K3;P12804		Q9D0A3	Q571M4;Q8VC28	Q571M4;Q8VC28		Q9R0M7;Q91X42	Q71LX8;P11499	Q62417-2;Q62417;Q62417-7;Q62417-5;Q62417-6;Q62417-4;Q62417-3	Q9D2R6;E9Q6W2	Q80X48;Q99P88;Q3UL43;Q6ZQ45;Q8BUA6		Q8BKR5	Q543F6;P49615	Q3TLP5;Q3TLP5-2;F6YTG0;Q3TLP5-3	Q91YR1
	Q9D3M4;Q91V77;Q9JL08;P56565	Q547R0;E9QAT0;Q6AXB7;P35922-3;P35922-2;P35922;D3Z6U8;E9QNF5;E9QAS8;P35922-9;P35922-8;P35922-7;E9QAS9;P35922-5;P35922-4;P35922-6;P35922-11;P35922-10;P35922-12;Q8BPK8	Q5SUC8;P52624;E9Q5K7	Q52L66;Q91W67	Q3THB3;Q9D0E1-2;Q9D0E1;Q3TW40;Q570Z0;Q3TQ66	Q4W8U9	P48036	Q9ER58;F6SLR4;Q80U51;Q6PAN0	Q9CQU1	N0E4C0;P67871;N0E4C5;G3UXG7;G3UZJ5;N0E463;G3UXU2	Q9CPS6;F8WH96	Q3UI56;P14824;Q3UDK4		Q8VH34;Q3TX84;Q3TA96;Q9DC13;P11438;Q922T9	Q9ERE7;D3YVR4	Q545N7;P30275;A2ARP5;B0R0E9;B0R0E8;B0R0F0;Q6P8J7	Q01853;Q8BNF8	Q9QYE6		P24638;Q3UZN1;Q3U4F3	Q9CQ65	Q64521;A2AQR0		Q8R0F3;E9Q265;E9Q0Z7	Q3TUQ5;O35691;Q9CV89	Q9CQU1	B2RRH9;Q3THK7	P30677;Q8CBT5;Q8C3M7		Q9QXY6;Q8R0V6				Q8R1K4;Q8R1K4-2;F8WHK6;Q8R1K4-3	D3Z6P0-2;D3Z6P0	Q9D2R6;E9Q6W2	Q4KL81;P63260;Q3TSB7;Q3UD81	Q505D7		D3YUP1;Q9WVG6-2;Q9WVG6	D3YUP1;Q9WVG6-2;Q9WVG6	Q8BKR5	Q99LL5;E9QAL6;Q9CTC0;Q9CSK2;Q8BW04
	Q5BKP5;Q99MJ9;Q8BRU5	E9Q5D6;P69566;P69566-2	Q99K41;Q3U254;Q3USG5;Q3UUU0	Q6KCD5-2;Q6KCD5	P18608;D3Z607;Q8CEW1	Q8BM84;P70372;Q8BVF8;Q8BTQ1;Q3UFF9	Q7TN29;Q7TN29-2	Q3TXR9;P20060	Q3U9G2;P20029;Q3TWF2;Q3TKF8;Q3TI47;Q9DC41;Q3U7T8;Q3UEM8	Q3V214;Q80UW8;Q8R0H0	Q8R0F3;E9Q265;E9Q0Z7	B1AY10;B1AY10-2;B1AY10-3		Q8BVL3	Q922H9;Q922H9-2	Q9D1M4;B0LAB0	G3X8R2;Q80VJ2	P70452		Q9R0M7;Q91X42	Q64521;A2AQR0	A2AFI8;B9EI38;B1AV20;Q3UHF8;Q80XA6		A2AFI8;B9EI38;B1AV20;Q3UHF8;Q80XA6	Q3U313;Q8VH51-2;Q8VH51;E9Q8F0;Q0VGU9;Q8VH51-3;B7ZD61	Q99J57;Q3THS6;Q3TSS0;Q3UZA2;Q3TED1;Q3UAP7;Q6PE05	Q5FW97;P17182	Q9BCZ4		Q9QXN3-2;Q9QXN3;Q3UJV0;Q3UBZ2				Q8VCT0;Q3U8R7;P35951;Q3TVR4;Q3TDD1;Q91ZJ1	Z4YKB8;Q3TEA8-2;Q3TEA8;Z4YKA3;Q3TEA8-3;A2AM65	Q3U8E7;P18155	B2RQS1;Q9ERG2	P98203-3;P98203-4;P98203-5;P98203-2;P98203		Q8VCT0;Q3U8R7;P35951;Q3TVR4;Q3TDD1;Q91ZJ1	Q9D0A3	Q9D0A3	Q80WW9
	P51859;E0CXA0	G3UVU2;Q7TN25;D3YW09;Q62203	A9E3L2;Q9Z2I2;Q80YE1;Q810R7	B2RXR2;Q8VD65;B2RY05	B7ZCL8;Q542P4;P70290;Q684Q6;A2AN84;B7ZCL9	Q3TT51;P12961	Q8R1J9;H3BK73;P0C7W3;Q8BT54	E0CZ04;E0CX39;Q923B0;Q923B0-2	Q3UM45	P62305;E9Q4F4	Q3UI56;P14824;Q3UDK4	Q8R015;Q3TB02;Q8R015-2		Q3V169;A2N6K9;E9Q046;O35706;L7N265;D3Z452;Q62183;E9Q2X0;Q99206;Q8C5S9;Q80YU2;Q80W76;Q62184;O35703;E9PYJ0;B2RUN1;Q8C641	P97930;Q6GRA7;P97930-2	P99028;Q8BMU6;Q9D2Q7	Q9D1M4	Q91W86;Q8C027		C7G3P2;Q61136;Q8BPG8	Q3TCD4;Q9WUR2-2;Q9WUR2;E9PYC6;E9Q858;E9PUY9;E9PYA9;E9PVM6;E9Q7A8	Q9JL18		Q9CZ62-2;Q9CZ62;Q8C1I9	Q3UWG5;P35762	Q62084	Q3U931;Q542W3;Q3U541;P97379-2;P97379;Q3U6B1	E9QAS4;E9QAS5;Q5DTP7;Q6PDQ2;Q99JM0		Q9R0M7;Q91X42				Q9QXY6;Q8R0V6	Q8BJF9	Q8CHP5;Q8CHP5-2	Q3U8E7;P18155	Q3V1M8;Q3U4Z7;Q8VDJ3;A0A087WP83		Q9D0A3	Q8BKR5	Q9QXN3-2;Q9QXN3;Q3UJV0;Q3UBZ2	P28651
	Q9D1R9	F6XC25;Q7TPN1;Q8BRN9	Q8R1E1;E9QL80;Q6A0A4;Q3UZK0;Q91YX5;D3YVK0	Q9R1R8;Q9QYF1;Q9R1R9;Q9R1R5	Q5EBP9;Q62318;Q3UDN8;Q62318-2	P50516;P50516-2	Q9EP52	Q9JL18	Q3TFA9;Q9JHJ0;Q8C3Z3	Q6F4J1;P83887;Q6F4J0;Q8VCK3	Q9CZD3	Q9CZD3		Q8BND5-2;Q8BND5;Q8BND5-3	Q3TX38;Q3TTN3;Q60931;J3QMG3	P62627;A2AVR9	Q8K2T8	F8WHU5;Q4VA53-3;Q4VA53;Q4VA53-2		Q4FJP2;Q3UJ82;O35309	Q9QZ06;Q8BQL7;A9JEI5;Q8C5G6	Q71FD5		A9E3L2;Q9Z2I2;Q80YE1;Q810R7	Q569Z6;Q8BZN7;Q91VL2	Q3U931;Q542W3;Q3U541;P97379-2;P97379;Q3U6B1	Q99J57;Q3THS6;Q3TSS0;Q3UZA2;Q3TED1;Q3UAP7;Q6PE05	Q3U8F5;Q9D8W5;B1AT36;Q3TRH2		Q3TCD4;Q9WUR2-2;Q9WUR2;E9PYC6;E9Q858;E9PUY9;E9PYA9;E9PVM6;E9Q7A8				S4R1W1	Q4FJQ6;Q3U3L3;Q60854;F8WIV2;K7E6F1;E9Q108;E9Q0P9	Q3TJD7	Q62417-2;Q62417;Q62417-7;Q62417-5;Q62417-6;Q62417-4;Q62417-3	Q5SWR1;Q9DBG3;Q9DBG3-2;H3BIY9;H3BKM0		O35459;F7B227	Q9QXN3-2;Q9QXN3;Q3UJV0;Q3UBZ2	Q8C0W0	Q3U311;Q03157;Q3TCA7;Q3TUB1
	F6XC25;Q7TPN1;Q8BRN9	Q3UGV7;G5E8R8;Q6P5G6	Q571M4;Q8VC28	Q3TN26;Q3TP13;Q544D7;Q60714	Q58E59;Q9D554	Q64737;Q3UJP8;Q3TH49;Q64737-2	Q5EBQ2;P70296;Q3TGC5;D3Z1V4;D6RHS6	Q571E4;Q8CC47	Q9D2U5-2;Q9D2U5	D3YZ20;Q6PI63;O08740;Q3TYI2	Q3TND6;O54782;F6TMZ3	Q3TMH2		Q8R1K4;Q8R1K4-2;F8WHK6;Q8R1K4-3	Q60I30;Q9D892;Q3U589	F8VQJ3;P02468;Q3TRH4;Q3URV4;Q3UNG0;Q3UFZ9;Q6PHM1;F6SFQ3;F6TLW1	Q3UD26;O35593;Q9CSU2	Q8CB77		Q9QXN3-2;Q9QXN3;Q3UJV0;Q3UBZ2	A2AFI8;B9EI38;B1AV20;Q3UHF8;Q80XA6	Q9QZ06;Q8BQL7;A9JEI5;Q8C5G6		Q8R1K4;Q8R1K4-2;F8WHK6;Q8R1K4-3	Q3TLQ4;P58064	Q9D0B6;Q9D0B6-2	Q9R1P0;Q3TL95;Q3UCF0;E9PW69	O08797		Q571E4;Q8CC47				Q6NSU3	P32020;P32020-2	Q9Z315	Q61935;A0A087WRZ7;Q545G5;E9PWG4;Q6PCW9;Q545T7;P05977-2;P05977;P09542	Q3U054;Q9D153;Q60772		Q9QXN3-2;Q9QXN3;Q3UJV0;Q3UBZ2	Q9R0M7;Q91X42	Q9R0M7;Q91X42	Q14C53;A0A068BIT0;Q31125
	Q6ZWZ6;P63323	B0FTY3;Q8R1N4;Q8R1N4-2;Q8R1N4-3	D3Z6J0;Q6SKR2;Q6PRU9;Q4KMV5;E9PXT7	D3Z6J0;Q6SKR2;Q6PRU9;Q4KMV5;E9PXT7	Q5DTL0;Q9EQG7;Q5FWJ8	Q3UZ63;Q3UL31;Q6NZF1;Q3TIV2	Q3UEQ1;D3YTM1;E9Q9A0;D3YUD3;D3YUL8;D3Z230	A2AQ19;Q3UXG8	P70333	Q8VDQ1;Q3TXN1;Q8VDQ1-2	Q9JJH1	Q69ZZ8;G5E8Q8		D3YX15;Q61153;D6RDQ6	Q9D0L8;Q9D0L8-2;Q9D0L8-3;D3YYS7;D3Z478	Q921W4;D3YZD6;D3Z6I4;Q921W4-2;D3YU21;F7BGV1	Q7TT04;Q3UJY4;P59235;Q3URN3	Q920I9-2;Q920I9;Q05CF1		E9PZ00;Q3TXJ0;Q8BFQ1;Q3U8C4;Q3TXP9;Q3TWL8;Q3TWM9;Q3UAS4;Q3U897;Q3U825;Q3U5W2;Q3TWF9;Q3TKB2;Q3TIT5;Q3TID4;K3W4L3;B2RUD7;Q3UFE8;J3QPG5;Q61207;Q3TKK3;Q3UE29	Q71FD5	Q9D1H8		Q9CQU0	A2RRK3;O54988-2	Q80Y52;P07901;Q3UIF3;Q3TKA2;A0PJ91;Q3TKB9;Q3TKG0;Q3TJU7;Q8C5U3	Q9JKB3-2;Q68G78;Q9JKB3;Q61478;Q64369;Q8BPG0	Q80ZX0;Q3UDH4;F6VJC5;Q3U882;Q6PFZ1		Q4FJP2;Q3UJ82;O35309				P24638;Q3UZN1;Q3U4F3	Q3TET1;Q3UI47;B1AQZ2;P28741;Q80UK1;Q3TSP1;Q3TTS7;Q8CGJ1	Q9Z0Y1;E9Q919	P70335-2;P70335	Q8C7V8-2;Q8C7V8;Q3V212		Q8BGX2	Q8VCT0;Q3U8R7;P35951;Q3TVR4;Q3TDD1;Q91ZJ1	Q8VCT0;Q3U8R7;P35951;Q3TVR4;Q3TDD1;Q91ZJ1	Q9JHH9;Q9CTG7;F2Z4A2
	Q8C1A5	Q9CQB4;Q9D855	Q6KCD5-2;Q6KCD5	I6L970;Q3TBX5;Q3U3K9;P70295;Q3TAZ9	Q9D1R9	O54941	A2AQ19;Q3UXG8	A1L340;Q8CGM2	Q52KP0;Q9JJI8	Q3SXD3	Q544U7;Q9ERI2	Q3UHI4;B9EKE7		Q8CG03;Q8BJ62	Q9WTL7	Q6ZPS0	Q3U3S0;P58404-2;P58404	Q5XJF6;P53026;Q3U561		Q9CWZ7;Q8C1T5;D3Z4B2	Q9D1H8	Q9QXY6;Q8R0V6		I6L970;Q3TBX5;Q3U3K9;P70295;Q3TAZ9	Q3TV90;Q9CYI4;Q05D11;D3Z765;Q9CYI4-2	Q4FZL1;Q5F2A7;P60843;Q3UXC2;Q3TGK7;Q3TFG3;Q3TLL6;Q3U8I0;Q78WR5	Q8BK67	Q6GTY4;Q9Z2G6-2;J3QJX3;Q5DTL8;Q9Z2G6		P24638;Q3UZN1;Q3U4F3				Q8CBY0	B7ZCL8;Q542P4;P70290;Q684Q6;A2AN84;B7ZCL9	Q8BQV7;Q6ZWX1;O55142;Q9DC85	Q8VIJ6;Q3TZL2	A2AFQ0;Q7TMY8;Q4JG03;Q7TMY8-4;Q7TMY8-2		Q3TCD4;Q9WUR2-2;Q9WUR2;E9PYC6;E9Q858;E9PUY9;E9PYA9;E9PVM6;E9Q7A8	Q9JL18	Q9JL18	P55937-1;P55937
	Q8R1S0;D3YW66	Q9WTP6-2;Q9WTP6	B2RXR2;Q8VD65;B2RY05	Q8BP21;Q545C3;P30285;E9Q9E4;E9PZX7;Q9D193	Q3UZ58;Q61578	Q8BT60;Q3UJS6	P15105	Q543M3;Q3UHZ4;Q3U5U9;Q3TT75;P06797;Q3UWH6;Q9D0C0;Q3TVJ1;Q3TNC8	Q8R326-2;Q8R326	P70122;F6TN03	Q32MU0;P63239	Q32MU0;P63239		Q9CZ62-2;Q9CZ62;Q8C1I9	P42125;Q9DBN7	A0A087WS27;D3Z5S8;Q8C152	Q62084	E9Q512;H3BJG4		Q6NSU3	Q9JL18	Q9QXN3-2;Q9QXN3;Q3UJV0;Q3UBZ2		D3YX15;Q61153;D6RDQ6	Q545N8;Q9Z2M7;Q9D1M5;Q9DCE3;Q9CZE9	Q3TLI6	F6TCF9;Q60739-2;Q60739;Q9CUY1	G3X8Y3;Q80UM3		Q9CWZ7;Q8C1T5;D3Z4B2				Q71FD5	Q5NCJ9;Q8R1I1	P70335-2;P70335	Q61171;Q5M9N9;D3Z4A4	Q6P4T3;Q3TP96;A2A953;P97480-2;P97480		Q3TMH2	Q8C0W0	Q3TCD4;Q9WUR2-2;Q9WUR2;E9PYC6;E9Q858;E9PUY9;E9PYA9;E9PVM6;E9Q7A8	Q61074
	Q9WTP6-2;Q9WTP6	Q8BGD8	Q9EQT6	Q9EQT6	Q78HU3	Q7TMM9	Q571E4;Q8CC47	P84086	Q9DCL9	Q8R105	Q6PAC1;P13020-2;Q3UCW8;P13020;Q3U9Q8;Q3TGJ9	Q5SW83;P61161;Q8BMA4		P26339;Q3UN28	Q5BLK2;P60867	E9Q2B2;Q5PRE9;Q5RIM6;Q60974-2;Q60974;F7C134;Q8VDE8;E9Q9Y2;Q8CHB6;E9Q8K6;Q3UV34;E0CYX5;Q8BK32;Q05CF0;Q05C35;Q5RIN0;Q3UV08;Q9CUV3;Q3UWZ3;F6U338;F6TBG5;F6TWR1;F6SFD2	Q9D1Q6;Q3URM4	Q544F6;Q9CQI6		D3Z7C0;Q3UKS6;Q9Z2Q5	Q9QXN3-2;Q9QXN3;Q3UJV0;Q3UBZ2	Q9CWZ7;Q8C1T5;D3Z4B2		Q6XPS7;Q9DBC9	D3Z600;O09012-2;O09012	Q8BK67	Q71LX8;P11499	Q61753		D3YU12;Q8K2T1;G5E8S7;Q8K2T1-2				Q9JL18	Q9ERB0	Q8BKZ9	Q8BKZ9	E9PZF0;Q5NC82;Q01768;B0LAA8;Q8R4B4		Q9R0M7;Q91X42	Q3TCD4;Q9WUR2-2;Q9WUR2;E9PYC6;E9Q858;E9PUY9;E9PYA9;E9PVM6;E9Q7A8	P24638;Q3UZN1;Q3U4F3	Q505D1
	Q8VDB7;Q8VDB3;P63015-2;A2A409;Q8VDB6;Q8VDB4;Q8VBY9	Q5BKP5;Q99MJ9;Q8BRU5	Q9D4H1;Q8K2J3	Q8C4G3;Q8C288;Q505G9;A2AQC3;Q6DI68;O70228	Q4KL81;P63260;Q3TSB7;Q3UD81	Q62470;Q62470-2;Q62470-3	Q9ER58;F6SLR4;Q80U51;Q6PAN0	Q9D8N2;Q3TH34	Q3UZ58;Q61578	Q3THE7;A7VL18;Q9JLJ2;Q3UDG0;Q3TMT4;Q3V1N7;Q3U367;Q3TG52	S4R225;Q8K412;Q32P16;Q91V09	Q60520;Q60520-1		B2RPS1;Q0PD56;P61021;Q8C458	P99026	P70460	Q9DBG9;B1AUD9	Q3TA69;E9Q912;E9Q6Q4;Q3TU36;Q3TPS9;Q8BKH0		Q922A2;Q3TJ49;Q07076;Q3UYL7;Q8BP75;Q8CCV9	Q9QXY6;Q8R0V6	E9PZ00;Q3TXJ0;Q8BFQ1;Q3U8C4;Q3TXP9;Q3TWL8;Q3TWM9;Q3UAS4;Q3U897;Q3U825;Q3U5W2;Q3TWF9;Q3TKB2;Q3TIT5;Q3TID4;K3W4L3;B2RUD7;Q3UFE8;J3QPG5;Q61207;Q3TKK3;Q3UE29		Q9CQ65	Q3UJR8;Q64152-2;Q64152	Q03265;D3Z6F5	O08807	Q78IS1		Q3TMH2				Q571E4;Q8CC47	Q4FJU3;Q9DCT8	Q8R2K1;D3YWS7;F6SJM7;Q8R2K1-2;Q8R2K1-3;Q8R2K1-5;Q8R2K1-4;F6X9P4	Q3TV90;Q9CYI4;Q05D11;D3Z765;Q9CYI4-2	A2AJH3;Q3THR4;O70311;Q8CFK1		Q571E4;Q8CC47	P24638;Q3UZN1;Q3U4F3	Q4FJP2;Q3UJ82;O35309	Q66JS6
	Q9Z2D6-2;Q9Z2D6	Q7TMY2;Q9DBL1;E9Q5L3;Q3V2R9	I6L970;Q3TBX5;Q3U3K9;P70295;Q3TAZ9	Q571M4;Q8VC28	P80316	Q9Z2X1;Q9Z2X1-2;J3QM80;J3QMT0	Q9JL18	Q4VA32;Q9CQR4	Q8BGR9	D3Z4U5;D3Z555;G3UYZ9;Q8BVL9	Q8K011;Q3UG03;Q3UEE0;Q04519	Q3V169;A2N6K9;E9Q046;O35706;L7N265;D3Z452;Q62183;E9Q2X0;Q99206;Q8C5S9;Q80YU2;Q80W76;Q62184;O35703;E9PYJ0;B2RUN1;Q8C641		Q3TJQ2;Q3U866;Q3U399;Q91ZN5-2;Q91ZN5	Q91V38;Q3UAD6;P08113;Q3UBU0;Q3TUD6;Q8CCY5;F7C312	Q0VGU0;Q9CQC9;Q3U281	P14576	Q8VDS8-3;Q8VDS8;Q8VDS8-2;D3YY98		Q9DB15	E9PZ00;Q3TXJ0;Q8BFQ1;Q3U8C4;Q3TXP9;Q3TWL8;Q3TWM9;Q3UAS4;Q3U897;Q3U825;Q3U5W2;Q3TWF9;Q3TKB2;Q3TIT5;Q3TID4;K3W4L3;B2RUD7;Q3UFE8;J3QPG5;Q61207;Q3TKK3;Q3UE29	Q9JKN1		Q8VCT0;Q3U8R7;P35951;Q3TVR4;Q3TDD1;Q91ZJ1	Q5SUR0	O08807	Q9DBP5	A2ARP8;Q9QYR6;Q9QYR6-2		Q9JL18				D3YU12;Q8K2T1;G5E8S7;Q8K2T1-2	Q8R1Q3	Q61935;A0A087WRZ7;Q545G5;E9PWG4;Q6PCW9;Q545T7;P05977-2;P05977;P09542	Q8R2K1;D3YWS7;F6SJM7;Q8R2K1-2;Q8R2K1-3;Q8R2K1-5;Q8R2K1-4;F6X9P4	P11352		Q3TLP5;Q3TLP5-2;F6YTG0;Q3TLP5-3	Q4FJP2;Q3UJ82;O35309	Q571E4;Q8CC47	F8VPU2;Q8K2R0
	A2A7Z4;Q78IG7;Q9CQH7	Q8VDQ1;Q3TXN1;Q8VDQ1-2	Q8R395	Q9CPS6;F8WH96	Q3UN87;P27048;P63163;O70499	Q5DTI3;P46097;Q9JM89	D3YUP1;Q9WVG6-2;Q9WVG6	P15105	Q60930;G3UX26;D3YZT5	P62830	Q9JL18	P17156;B7U582		D3YYW8;Q91V81;Q91V81-2	Q3TAH3;Q9CPP0	Q3U2W2;Q7TPV4;Q3TLF6	Q8R059	Q62417-2;Q62417;Q62417-7;Q62417-5;Q62417-6;Q62417-4;Q62417-3		Q9JL18	Q9CWZ7;Q8C1T5;D3Z4B2	Q571M4;Q8VC28		Q14BZ3;P70202	Q3V275;Q99N23	Q9DBP5	Q14B01;Q9D7A3	G3X9N6;B9EJ86;Q69ZJ4		Q6NSU3				Q3TCD4;Q9WUR2-2;Q9WUR2;E9PYC6;E9Q858;E9PUY9;E9PYA9;E9PVM6;E9Q7A8	D3Z0V7;E9QLZ1;P62500-3;P62500;D3YW86;Q3UXU0;P62500-2;H3BLI9;A7LCN1;Q9CVK3;Q6PE86;Q148S0	Q4KL81;P63260;Q3TSB7;Q3UD81	Q8K1Z0;F6SFF5	Q99LX5		P24638;Q3UZN1;Q3U4F3	Q571E4;Q8CC47	Q6NSU3	Q8CE96;Q8CE96-3
	Q922H9;Q922H9-2	K3W4Q9;Q8BH60-2;Q8BH60	Q9CQ54;Q9D846	Q9CZS7;Q544E3;O70172;F6RJE8	Q3SXD3	Q99L69;Q3U3J1;P50136	P84086	Q8R395	Q3TKQ3;Q8VBV3;A2AV19	Q9CQE1;B1AWZ5	B1AY10;B1AY10-2;B1AY10-3	Q9CXD6;Q9CXD6-3;Q9CXD6-2		Q571E4;Q8CC47	Q52L55;Q9QYC3	Q9CQK7	Q4FK54;P61290;A2A4J1	Q148W0		Q9CXS4	Q9JKN1	Q3TMH2		Q8BKR5	G3X9L6;Q9DCX2;B1ASE2	D3Z0V7;E9QLZ1;P62500-3;P62500;D3YW86;Q3UXU0;P62500-2;H3BLI9;A7LCN1;Q9CVK3;Q6PE86;Q148S0	Q9D0B6;Q9D0B6-2	P70698		Q3TLP5;Q3TLP5-2;F6YTG0;Q3TLP5-3				Q571M4;Q8VC28	Q9DBF1-2;Q9DBF1;G3UYR8	A3KML3;P68254;F6VW30;P68254-2;F6YY69	P99026	P25799;P25799-4;P25799-2;P25799-3		D3YU12;Q8K2T1;G5E8S7;Q8K2T1-2	Q6NSU3	D3YU12;Q8K2T1;G5E8S7;Q8K2T1-2	Q3UIP1;A2AER4;Q9R0M8
	Q547R0;E9QAT0;Q6AXB7;P35922-3;P35922-2;P35922;D3Z6U8;E9QNF5;E9QAS8;P35922-9;P35922-8;P35922-7;E9QAS9;P35922-5;P35922-4;P35922-6;P35922-11;P35922-10;P35922-12;Q8BPK8	Q80VP1;Q80VP1-2	Q8BP21;Q545C3;P30285;E9Q9E4;E9PZX7;Q9D193	Q8R1E1;E9QL80;Q6A0A4;Q3UZK0;Q91YX5;D3YVK0	D3Z600;O09012-2;O09012	D3Z3A0;Q9DCL8;Q8BVM6;Q9CT86	Q8R395	Q8BJY1	Q3THE7;A7VL18;Q9JLJ2;Q3UDG0;Q3TMT4;Q3V1N7;Q3U367;Q3TG52	Q62470;Q62470-2;Q62470-3	Q69ZZ8;G5E8Q8	Q8K011;Q3UG03;Q3UEE0;Q04519		Q9ME04;Q7JCY6;P03911;W0TGY1;F1JVR2;A9UIX0;Q3UQ59;A0A075DCI1	Q8BMS1;Q3TB39	Q9JHH9;Q9CTG7;F2Z4A2	A1L3B8;P26516	Q4FK85;Q3U607;A0A087WQT6;O89110		Q9CQ65	Q571M4;Q8VC28	Q922A2;Q3TJ49;Q07076;Q3UYL7;Q8BP75;Q8CCV9		Q8R121;Q8R121-2	Q8C1L7;Q9CQR2	Q9DCM0	Q80Y52;P07901;Q3UIF3;Q3TKA2;A0PJ91;Q3TKB9;Q3TKG0;Q3TJU7;Q8C5U3	Q3U054;Q9D153;Q60772		Q9CQ65				Q8C0W0	G3XA13;Q99NH2;B2RUK1;B7ZNY3;F6S7Z1;A5D6P2;Q99NH2-2;E0CXR8;E0CZE2;E0CZ83;E0CXL4;Q99NH2-4;Q8BPQ6;Q8BPQ4;E9PYJ2;F6TSJ9;Q99NH2-3;E0CX45;E0CY24;Q99NH2-5;F6UGU7	A2AD03;Q3UR39;Q9QXG2;Q8CBI2	A2AD03;Q3UR39;Q9QXG2;Q8CBI2	Q6PIP5		Q9JL18	Q571M4;Q8VC28	Q571M4;Q8VC28	P62196;Q99KR1;Q8K1K2
	P56480	Q61171;Q5M9N9;D3Z4A4	Q9CPS6;F8WH96	F8VQ95;Q6Y685;Q6Y685-2	Q8BQ47;D3Z0T5	Q9CQU1	Q543M3;Q3UHZ4;Q3U5U9;Q3TT75;P06797;Q3UWH6;Q9D0C0;Q3TVJ1;Q3TNC8	D3YUP1;Q9WVG6-2;Q9WVG6	A2A8L5;F6Y3V0;F6S1X8	A2APY7;A2APY7-2	Q8BK48	Q3TLS3		Q9CQ54;Q9D846	Q3U9V4;P62880;E9QKR0;D3YZX3;D3Z1M1;D3Z1T4	P56375	Q60759;Q8BVD4	Q4FJZ6;Q3T9P2;O09172;H3BJA3		Q571M4;Q8VC28	Q3TMH2	Q3TLP5;Q3TLP5-2;F6YTG0;Q3TLP5-3		Q3TLP5;Q3TLP5-2;F6YTG0;Q3TLP5-3	Q8BV13;Q3TDL0	Q3UK33;O08908;F7CB91	Q03265;D3Z6F5	Q56A13;Q8BG94;Q8BTK9;Q8CF03;Q8BQS7;A2AU52		Q571M4;Q8VC28					Q8BTJ1;Q543K5;Q3ULZ3;Q99K85;Q3U6K9	B2RQS1;Q9ERG2	Q3U3S0;P58404-2;P58404	Q8BU33;Q8BU33-3;Q8BU33-2		Q9CWZ7;Q8C1T5;D3Z4B2	D3YU12;Q8K2T1;G5E8S7;Q8K2T1-2	Q9CWZ7;Q8C1T5;D3Z4B2	Q60803;Q3UHM2;Q3UHJ1
	Q5FWX7;Z4YJX3;Q8VDM5;Q8R0G3;E9Q6C1;F6UHR6;E9PXZ2;A2A8Z1-2;A2A8Z1	Q8BN32;P29341;Q3U8U8;Q99KL3	F8VQ95;Q6Y685;Q6Y685-2	B0LAE4;Q3UBA1;Q3TQE3;Q8C1Y9;Q80ZW9;Q3TIC7;Q3THR3;Q9JKW0	Q58EV5;P63158;Q8C7C4;Q8BNM0;Q6P202;Q497Z6;Q8BQ02;Q3UBK2;Q3UJK0;D3YZ18	D3YZ20;Q6PI63;O08740;Q3TYI2	Q4VA32;Q9CQR4	Q64685;Q9JJM6	Q8VE22;F7ARZ1;Q3TI14;Q3THH3;Q99LZ4;Q5SXC9;A7M7Q8	Q497E9;P62242;Q5M9L9;Q3UJU6;Q9CQW4;Q3UA25	Q3V169;A2N6K9;E9Q046;O35706;L7N265;D3Z452;Q62183;E9Q2X0;Q99206;Q8C5S9;Q80YU2;Q80W76;Q62184;O35703;E9PYJ0;B2RUN1;Q8C641	Q3TND6;O54782;F6TMZ3		Q6PDI6;Q6PDI6-3	Q4VA29;Q9CQE8;J3QNB0	Q99M31;Q99M31-2;F6QKP8;D6RJ26	Q6P1A9;Q5EBG5;Q58ET1;Q80UT7;P12970	Q9DBC3		Q8R1K4;Q8R1K4-2;F8WHK6;Q8R1K4-3	Q922A2;Q3TJ49;Q07076;Q3UYL7;Q8BP75;Q8CCV9			Q9D020-1;Q9D020	Q8BJF9	A0A023T778;Q9CQL1;P61327;G3UZW7;G3UYI5	D3Z6P0-2;D3Z6P0	G5E829;Q8K314		Q8R1K4;Q8R1K4-2;F8WHK6;Q8R1K4-3					Q3TN93;Q3T992;Q8R317-2;Q8R317;Q66K07	Q3UHL7;E9QN70;B9EKB0;P02469;Q9CRX6;Q8K271	Q91YR1	Q3U8S0;Q9DCR2		Q4FJP2;Q3UJ82;O35309	Q9CWZ7;Q8C1T5;D3Z4B2	Q9CQ65	Q8C650-2;Q8C650
	Q68G54;Q9QYB2-2;Q9QYB2;Q3UTV2	O08553	Q91YL3	Q3U5Q7	Q3THG9;A2A4P3;A2A4P4	D3Z7X0;D3Z2B3	Q9D8N2;Q3TH34	Q3TCD4;Q9WUR2-2;Q9WUR2;E9PYC6;E9Q858;E9PUY9;E9PYA9;E9PVM6;E9Q7A8	Q3UFJ3;P35486	Q9R062;Q3TWR9;K3W4S6;V9GX26	Q9CXD6;Q9CXD6-3;Q9CXD6-2	Q8R3P6;Q8R3P6-2		Q8VCT0;Q3U8R7;P35951;Q3TVR4;Q3TDD1;Q91ZJ1	Q545F4;P14602-2;P14602;P14602-3;D3YZ06	Q3TDT0;Q9R1R2	Q3TUF3;O35887;Q3UG11;Q3TQD1;G3UWV3;G3UWR0;G3UY49	Q9JJ59;Q9JJ59-2		Q9D1H8	Q3TLP5;Q3TLP5-2;F6YTG0;Q3TLP5-3			Q6NSU3	Q3U1S6;Q91W50;Q8JZN2;Q80TP8;Q3U4S7;Q3TXH7;Q8R3R1;Q3U672	Q5FW97;P17182	Q8BH43;Q3T9Z7;Q80UQ8	P09055;P09055-2							P70335-2;P70335	P99026	D3Z767;Q9D6K7;D3Z1T8;Q9D6K7-2	A2AJI0-2;A2AJI0;F6WF36		Q571M4;Q8VC28	Q8R1K4;Q8R1K4-2;F8WHK6;Q8R1K4-3	Q8R1K4;Q8R1K4-2;F8WHK6;Q8R1K4-3	Q3UFV9;Q91YW3;Q3UKA1
	Q9CV53;Q91WK5	Q9D1R9	Q8C4G3;Q8C288;Q505G9;A2AQC3;Q6DI68;O70228	Q9CQ54;Q9D846	Q8C476;Q543C2;Q99PM9	E9Q3H7;E9Q0B6	Q64685;Q9JJM6	Q3V4A0;Q921L3	Q3U0V1	Q8C2D2;P70362;Q9CWQ7;Q9CZJ3	Q4FJQ8;Q3UAX2;Q8C562;Q3UC81;Q3UB98;Q3UB54;Q3U841;Q3U784;Q3U5U0;P11152;Q3UCZ2;Q3UCD4;Q3UC44;Q3UBE9;Q3U715;Q3UCH4;Q3U6S8	Q8R0Q6;Q3UHG5;Q6PDN6;Q62283		Q6XPS7;Q9DBC9	Q3V1M8;Q3U4Z7;Q8VDJ3;A0A087WP83	Q8C1L7;Q9CQR2	P62196;Q99KR1;Q8K1K2	Q9JHU4		Q3TMH2				Q9R0M7;Q91X42	Q99JB2;A2AG39;F6WI02	D3Z767;Q9D6K7;D3Z1T8;Q9D6K7-2	Q3V1M8;Q3U4Z7;Q8VDJ3;A0A087WP83	P48962;Q8BVI9							Q3UIA1;P19426-2;P19426;G3UY39	Q3TV90;Q9CYI4;Q05D11;D3Z765;Q9CYI4-2	Q9Z315	Q8BH01-3;Q8BH01-2;Q8BH01		Q6NSU3	Q9CQ65		O55234
	Q8BGN2;F8WJL8	Q8R1S0;D3YW66	A3KN68	Q9JJU8;Q3U9A8	D3YZZ5;E9Q7G1	Q60668-3;Q60668;Q3UXC8	Q3TCD4;Q9WUR2-2;Q9WUR2;E9PYC6;E9Q858;E9PUY9;E9PYA9;E9PVM6;E9Q7A8	Q3UI56;P14824;Q3UDK4	Q8VDS4	Q3U0S4;Q7TSG2	Q80XN0;D3Z2Y8	Q3V4A0;Q921L3		Q8R1E1;E9QL80;Q6A0A4;Q3UZK0;Q91YX5;D3YVK0	A2RSV8;P19783	Q3UBB6;Q8CE21;Q3U6W2;Q3UI16;Q3TKZ9;E9Q5C9;Q6ZQK6	P56375	Q9JKK1-2;Q3UA21;Q3TX70;Q9JKK1		Q3TLP5;Q3TLP5-2;F6YTG0;Q3TLP5-3				Q3TMH2	Q8BH95;F6T930	Q14B01;Q9D7A3	Q3THA6;Q8BL97-3;Q8BL97-4;Q8BL97-2;Q8BL97	Q5XJF6;P53026;Q3U561							Q3TVS6;P10605;Q3TC17;Q6LAF6	Q3UGK7;Q3UQ99;Q7TPN5;Q3TXX8;Q91YD9	Q3TJD7	Q61510		Q9CQ65			Q80TZ3;Q80TZ3-2;Q80TZ3-3
	Q8BGD8	Q9Z2D6-2;Q9Z2D6	Q9CZS7;Q544E3;O70172;F6RJE8	Q8R395	Q3UMU9;Q3UMU9-3;Q3UMU9-4;Q3UMU9-2	Q8C052;B2RWW1	Q8BJY1	Q544U7;Q9ERI2	Q3UYH7;Q8BVT9	A0JNY3;Q8BUV3	S4R1W1	Q8VH34;Q3TX84;Q3TA96;Q9DC13;P11438;Q922T9		Q9Z2C9;G3V027;I6L9A6;G3UYB7;G3UYZ2	Q9CSH3;Q8R2P7	Q5SUR0;Q3UTT7;F6RUL9;Q8BVW7;G3UY86;Q14BH5	Q8VEH6;Q8VEH6-2	P60670;Q3UE06;Q3UDU9;P60670-2						Q64521;A2AQR0	Q504N0	Q3TK27;Q8CI11;Q8CI11-2	Q99NF7;Q5BKS2	I1E4X5;Q8BWQ6;D3YW20;D3YW19;Q8BWQ6-3							Q8BTX9	P97930;Q6GRA7;P97930-2	Q3U931;Q542W3;Q3U541;P97379-2;P97379;Q3U6B1	Q8BPF9;Q545V8;O54833;Q8CDH5		Q8R1K4;Q8R1K4-2;F8WHK6;Q8R1K4-3			G3X8R2;Q80VJ2
	Q5SWJ8;P60060;G3UWH0	P52946	Q9QXY6;Q8R0V6	Q91YL3	E9Q4D5;Q8VEL9;Q8VEL9-2	P52480	E0CZ04;E0CX39;Q923B0;Q923B0-2	Q9ER41	P70460	Q99KG3-2	Q9CZ62-2;Q9CZ62;Q8C1I9	Q8VEK0;D3YVV1		Q99JR1;Q8BPC9	Q543K9;P23492	Q9ERB0	Q8VCH8;Q3UFS2;Q05C23	Q61935;A0A087WRZ7;Q545G5;E9PWG4;Q6PCW9;Q545T7;P05977-2;P05977;P09542						P56376;Q4VAF0;E9QJT5	Q62393-3	Q8QZV7;F6W761	Q9EQF6	Q69Z43;Q8K1R7							Q6PIP5	Q91YR1	Q3UHL7;E9QN70;B9EKB0;P02469;Q9CRX6;Q8K271	Q3UVI9;Q99LE6					A7VJ98;Q9CQI3;Q80X87
	Q3U6U7;P32921-2;Q3UDG2;Q4FJZ4;P32921	Q3U6U7;P32921-2;Q3UDG2;Q4FJZ4;P32921	E9Q7N5;Q8R2Q4-3;Q8R2Q4-2;Q8R2Q4;Q3TML3;Q3TSU6;Q8C1C2	Q99K41;Q3U254;Q3USG5;Q3UUU0	E9QB01;P13595-2;E9Q589;P13595-3;P13595-4	Q9JHI7;B2RY30;D6RGB5	A1L340;Q8CGM2	Q3TLS3	Q91YL8;Q5BLJ4;Q3UAE6;Q3TIJ4;Q9D7H3;D6REI7;D6RD00	P43274	Q9R0M7;Q91X42	P84086		B2RXC1	Q3UCH0;P47911;Q3UFI4;E9PUX4	Q9CY58;Q3UJK2;Q9CY58-2;Q3UMP4;Q3UEI6;Q9CY58-3;Q3V274;Q9CY58-4	D3Z6P0-2;D3Z6P0	P06837						Q8CG03;Q8BJ62	V9GXH3;V9GXF0;V9GXP8;F8VPM7;Q99MI1;V9GWT6;Q99MI1-2;V9GX53;Q99MI1-4	D3Z6P0-2;D3Z6P0	Q3TK27;Q8CI11;Q8CI11-2	Q9Z2P7;Q91XH6;O88384;Q3TUP8							A2RRK3;O54988-2	P50518	Q3UGK7;Q3UQ99;Q7TPN5;Q3TXX8;Q91YD9	Q80TM2;P26039;Q3UHS6					D3Z1F6;B9EK90;Q8VDU5
	Q61171;Q5M9N9;D3Z4A4	Q3TPZ5;Q99KJ8	Q3UCY7;Q3TWN7;Q571E2;Q9R1Q9;Q3TT23;Q3THZ3;Q3UWN7;Q3TKX1	Q2M4G8;O35239	A6H663;Q9JLV1;Q3TAM9	Q8R086	Q3UI56;P14824;Q3UDK4	P10649;A2AE89	P62073	P63330;Q8BN07	P56376;Q4VAF0;E9QJT5	E9Q1Q9;P97328;Q9CPP1;D3YVB6		B1AY10;B1AY10-2;B1AY10-3	Q5SUT0;Q3UI30;Q6NVA3;Q5SUS9;Q61545;Q9CRS5	Q8BJA6;Q3UY68;Q91YS8;Q3TDH8;D3Z368;Q3TDM2;Q3UH04;B1AW58;Q8BW96-2;Q8BW96-3;Q8BW96	Q3TDT0;Q9R1R2	Q544R8;Q9ES56;Q3V493						Q8CBY0	O54941	Q6ZQ47;Q3UYC8;A2BDX0;Q5BL11;Q5RKY4;Q9Z103	Q9CPQ3;Q3UBW3	B0V2Q7;Q3UN02							Q3TA59;F6Q269;D3Z1G6	Q3U931;Q542W3;Q3U541;P97379-2;P97379;Q3U6B1	P97930;Q6GRA7;P97930-2	Q3TQR3;P59325;Q3TKY2;Q8BVV6;Q05CM5;Q05CH7;Q3TT65;Q6PHA6;Q05C65					Q6ZWR6-4;Q6ZWR6
	Q3U319	P56480	P26339;Q3UN28	Q9QXY6;Q8R0V6	Q3U9X2;Q9ES84;O35901;O35900;Q9EP83	Q8BTX9	Q3TLS3	Q3UCY7;Q3TWN7;Q571E2;Q9R1Q9;Q3TT23;Q3THZ3;Q3UWN7;Q3TKX1	A0JNY3;Q8BUV3	A1L0U3;B9EI85;P84228;A1L0V4;P68433;F8WI35	Q544T7;P45700	Q99K41;Q3U254;Q3USG5;Q3UUU0		F6TBV1;F6WHL0;A2ADH1;Q9CQY5-2;Q9CQY5-3;Q9CQY5	Q8VEH8;Q9CWA6	Q8CAJ7;Q3U3I6;Q3TVK3;Q9Z2W0;Q8BPW9;A0A087WS31;A0A087WSE6;A0A087WRC1;A0A087WNX3;A0A087WSD3;A0A087WSU0	Q99LL5;E9QAL6;Q9CTC0;Q9CSK2;Q8BW04	E9Q7G0						B2RUS7;Q8BNE2;Q6PGE2;Q9Z2P1	Q9EQ80;Q3V2R8;D3Z0G0;Q8C608;Q5FWC8	Q9EQF6	Q4FZL1;Q5F2A7;P60843;Q3UXC2;Q3TGK7;Q3TFG3;Q3TLL6;Q3U8I0;Q78WR5	P70280							P20108;Q8K4K8	Q8BN32;P29341;Q3U8U8;Q99KL3	Q3U5N4;P54923	D3Z6G3;D3YUY6					D4AFX6;Q6ZQK5;Q6ZQK5-2
	P62196;Q99KR1;Q8K1K2	P60879-2	Q9QWR8	Q9QWR8	P17751;H7BXC3	B7ZCU2;B7ZCU5;Q3TPY5;Q3TMI0;Q6AXD3;B7ZCU4;B7ZCU3;Q3TJR5;Q3TJ64;B7ZCU0;J3QNK8;Q8CBW3-5;Q8CBW3-2;Q8CBW3-4;Q8CBW3-3;Q8CBW3;Q3UAH6	Q3V4A0;Q921L3	Q11011;E9Q039;F6QYF8;E9Q6F4	Q3TS44;Q9R1P4	Q5EBQ0	Q9D1F4;E9QKI5;E9QKI4;D3Z4R0	Q9DCT1;Q8CEB6		Q99M47;Q3TPJ9;O08738;Q9D089	E0CYJ0;E0CXA9;Q3UGM5;Q6PEB6;G8JL35	Q61249;Q9QZ29	Q9DAI2;Q3TV16	E9Q5N7;B2RX09;Q6ZQ25;E9PUN0;Q3UGZ9;E9PUM9;E9Q7X7						Q9Z2C9;G3V027;I6L9A6;G3UYB7;G3UYZ2	Q8VIJ6;Q3TZL2	P97868-2;P97868	Q3TVP0;P17095-1	G5E850;Q544Z9;P56395							E9Q1G8;Q8C2A3;E9Q9F5;O55131;Q3UNN1;Q5DTS3	Q6P1B9;O08539-2;O08539	A3KML3;P68254;F6VW30;P68254-2;F6YY69	Q3UVN5;Q9CZ44;Q9CZ44-3;Q3KQQ1;A2AT02;Q9CZ44-2					Q99LD9;Q8BK57;D3Z487;D3Z7J6
	Q8CIN6;Q8CIN6-2	Q3U319	Q9JJU8;Q3U9A8	B2RPS1;Q0PD56;P61021;Q8C458	Q3TT94;Q6P1F6;Q571J7;Q3TPC5;Q9CWU3	Q9JIA1	Q11011;E9Q039;F6QYF8;E9Q6F4	P58022-2;P58022	Q5SU48;Q7TN98-4;Q7TN98-5;Q7TN98-3;Q7TN98-2;Q7TN98;Q5SU47;Q9D5G2;Q9D5F3;F6T0J8;A1A562;D3YUJ4;E9Q5X2;E9Q969;Q812E0	Q3UJB0;Q3UAI4;Q80W39;Q3UBH2;Q3UQU5;Q8BL33	Q3UHI4;B9EKE7	Q5EBQ2;P70296;Q3TGC5;D3Z1V4;D6RHS6		Q545Q2;Q64310;Q3U7E6;E0CXD9;F7CH13	Q7TMK9-2;Q7TMK9;G3UZI2;G3V018;G3UZ48;G3UXJ6	Q8R332-2;Q6ZQC2;Q3UZQ6;Q8R332-4;Q8R332-3;Q8R332	O35226;Q9CY29;O35226-4	A2AFQ0;Q7TMY8;Q4JG03;Q7TMY8-4;Q7TMY8-2						P97807-2;P97807	Q62084	P56480	Q3TPU5;O70378;Q8C988;Q3TTC9;M0QWY0;M0QWP2	Q8K354							Q9EQ80;Q3V2R8;D3Z0G0;Q8C608;Q5FWC8	P80316	P80316	O35114					Q5M8Q0;Q3U7D2;E9QAZ2;Q9CZM2
	Q3TPZ5;Q99KJ8	Q642L7;P62983;A5JUZ1;E9Q9J0;Q8C2K3;E9Q5F6;Q922B0;Q5SX22;Q3TH47;Q78XY9;Q6NZC5;Q8R0Z9;Q922Z8;Q8VC46;P0CG49;P0CG50	B1AY10;B1AY10-2;B1AY10-3	Q3UCY7;Q3TWN7;Q571E2;Q9R1Q9;Q3TT23;Q3THZ3;Q3UWN7;Q3TKX1	P49813	Q3TDX2;Q8VEJ9	Q8C0W0	Q99K70	Q3TYX5;L7N466;Q9D110;B2KF83;Q8R1G5	P97823;J3QK48;J3QP56;P97823-2;Q4FK51;D3Z111;D3Z269;D3YUG4	Q5EBQ2;P70296;Q3TGC5;D3Z1V4;D6RHS6	Q9QWR8		Q9R0M7;Q91X42	Q5SW18;P63005;Q3UH92;Q3UGR6;Q3TJG1;Q3UHM0;P63005-2;Q3TIK0	Q3TCN5;Q91X51	E9PVD1	Q6PA06;E9QND8;Q8BYP9;Q6PA06-2						Q8CJ40;Q8CJ40-3;Q8CJ40-2	Q3U4U6;P80318;E9Q133;Q3U0I3;F6Q609	Q3TPU5;O70378;Q8C988;Q3TTC9;M0QWY0;M0QWP2	Q5XJY5;Q3U4S9;Q8R1S6;Q3TDU1;Q8C0G7	Q80UJ7;Q3UYK8							A2AER7;Q91VJ5;A2AER8	Q3U5N4;P54923	Q8BN32;P29341;Q3U8U8;Q99KL3	Q9CXN7;D3Z2D7					P54775;Q569X4;Q3TFA5;Q8BKU2;Q3TJ97;Q3UBF0;Q52L53
	F8WI31;Q922V4;D3Z4V1	Q80T84;D3Z624;G3XA21;E0CZ22	Q8BQW4;A2AH25;Q5FWK3;Q8C5A0	Q3ULN8;Q6PD03	Q3UMP2;P38060	Q3TKM9;Q9CPW4;Q3UC32;Q3UA72;Q3TK56	D3YXH0;P63054	Q8R3P6;Q8R3P6-2	Q99JY0	Q99JW2	Q9ER41	Q9R0M7;Q91X42		Q8K354	E9PV44;O35143	P63254;Q8C2N7;Q6P3B4	Q3U2W2;Q7TPV4;Q3TLF6	Q80U95						Q3V169;A2N6K9;E9Q046;O35706;L7N265;D3Z452;Q62183;E9Q2X0;Q99206;Q8C5S9;Q80YU2;Q80W76;Q62184;O35703;E9PYJ0;B2RUN1;Q8C641	Q52KC5;Q9CQP3	Q3TVP0;P17095-1	Q3UK33;O08908;F7CB91	P26645;Q05BL6							D3Z767;Q9D6K7;D3Z1T8;Q9D6K7-2	D3Z767;Q9D6K7;D3Z1T8;Q9D6K7-2	P50518	Q60936;F7B1B6;Q60936-2					Q5DQJ3;P47754;Q3UBZ3;D6RCW7;Q3U7G3
	Q3V214;Q80UW8;Q8R0H0	Q922H9;Q922H9-2	Q3U5Q7	P42232	Q9JHI7;B2RY30;D6RGB5	Q3U3H5;Q68FH4;Q8BUU7;Q3U728;Q8BWB2	Q9ER41	A2ARP8;Q9QYR6;Q9QYR6-2	Q6PDI4;Q3USH5	Q99J57;Q3THS6;Q3TSS0;Q3UZA2;Q3TED1;Q3UAP7;Q6PE05	A2AEM2;Q99LI2	P68404-2;P68404		A2AFI8;B9EI38;B1AV20;Q3UHF8;Q80XA6	Q99K28;Q99K28-2	E9Q616;A0PJF4;Q61484;A0JLR7;Q8BKS2;Q8VDN3;Q8BRB8;Q8CGE7;Q6UIL4;Q3UYW8;G5E8K8;Q8R2L7;Q8CEX7	E9Q1G8;Q8C2A3;E9Q9F5;O55131;Q3UNN1;Q5DTS3	Q8BH79-2;Q8BH79;Q8BH79-4;Q8BH79-3						D3YU12;Q8K2T1;G5E8S7;Q8K2T1-2	Q61024;Q3TV20;Q3TIA9	Q9CPQ3;Q3UBW3	Q9DBF1-2;Q9DBF1;G3UYR8	Q9Z2C9;G3V027;I6L9A6;G3UYB7;G3UYZ2							Q8CIN4	G5E924;Q3UMT7	Q8C1L7;Q9CQR2	Q921N0					Q66JR8
	Q99MR6-3;Q99MR6-4;Q99MR6-2;Q99MR6	Q8BGN2;F8WJL8	B2RPS1;Q0PD56;P61021;Q8C458	Q8CG03;Q8BJ62	Q62470;Q62470-2;Q62470-3	O08749;Q3TIE8	Q3UCY7;Q3TWN7;Q571E2;Q9R1Q9;Q3TT23;Q3THZ3;Q3UWN7;Q3TKX1	Q8C0W0	Q3TGB1;Q9CQ26;Q5DTH9	Q99JY0	Q91YL3	Q8CJ40;Q8CJ40-3;Q8CJ40-2		Q6NSU3	Q3TLZ6;Q8BW84;Q99JT1	Q5SU48;Q7TN98-4;Q7TN98-5;Q7TN98-3;Q7TN98-2;Q7TN98;Q5SU47;Q9D5G2;Q9D5F3;F6T0J8;A1A562;D3YUJ4;E9Q5X2;E9Q969;Q812E0;Q3TSF0;Q3U4E1	Q9D3U0	Q9JIK5;Q6PCP0;Q3ULC7;Q9CWZ5;Q8K2L4						Q571E4;Q8CC47	Q6P1A9;Q5EBG5;Q58ET1;Q80UT7;P12970	Q99NF7;Q5BKS2	E9QN44;Q8CIM3	Q6NXX6;K3W4T3;Q9Z1G4-3;Q9Z1G4-2;Q3TXT5;Q9Z1G4;Q3TY98							Q8BK67	Q3U3S0;P58404-2;P58404	Q6P1B9;O08539-2;O08539	Q80U72;Q80U72-4;Q80U72-2;Q80U72-3;F6RIN9					Q3UT02;E9Q066;G3X9Q6;Q8BWW4
	A2A8L5;F6Y3V0;F6S1X8	Q3UAT9;Q3U9N8;P24547;Q3UPJ2	Q2M4G8;O35239	E9Q7N5;Q8R2Q4-3;Q8R2Q4-2;Q8R2Q4;Q3TML3;Q3TSU6;Q8C1C2	Q9JKX6	Q9Z2H7	Q544U7;Q9ERI2	Q80WM4	Q62418-3;Q62418-2;Q62418	Q3UGV7;G5E8R8;Q6P5G6	Q0PD14;Q8BHC1	Q9CZ62-2;Q9CZ62;Q8C1I9		Q3U5Q7	Q8R2Y2;Q8R2Y2-2	B2RSU7;E9PWI6;Q8CHG3;E0CYI9;Q3UFV3;Q6P0A4;F6UT01;E0CY89;E0CX24	Q99M31;Q99M31-2	E9PX48;A2A9M5;Q8R1A4-2;Q8R1A4						P24638;Q3UZN1;Q3U4F3	F7DEU6;P50096;E0CYE2	E9QN44;Q8CIM3	Q8K0C9	Q80WJ7;F6QHD1;F6ZSG0							F7BJK1;Q2TJI9	Q4FJQ6;Q3U3L3;Q60854;F8WIV2;K7E6F1;E9Q108;E9Q0P9	Q8BFZ3	Q3TCH7;Q8R1T2;Q3UD60					Q6P1A9;Q5EBG5;Q58ET1;Q80UT7;P12970
	E0CY91;E0CYW1;E0CY38;E9QJZ1;E0CZB3;Q9EPV8	E0CY91;E0CYW1;E0CY38;E9QJZ1;E0CZB3;Q9EPV8	Q3THU8;Q8VEM8;G5E902;Q3UB63;Q3U995	Q8BQW4;A2AH25;Q5FWK3;Q8C5A0	P11983;P11983-2	P60824;K4DI65;D3YU80	P10649;A2AE89	Q3TAJ6;P58854;Q3TN67;Q80U29	G5E8P4;G3UWY3;B2RWU4;Q5NBX1-2;Q5NBX1-3;Q5NBX1	I7HLV2;Q3THJ6;Q6ZWV3;P86048	P84086	P26339;Q3UN28		Q571M4;Q8VC28	Q3U4U6;P80318;E9Q133;Q3U0I3;F6Q609	Q6WVG3;Q69ZA6	Q91WT9-2;Q91WT9	Q8BTU4;Q564E6;Q3TG93;P32067;Q9CYB9						P47867	Q8VE88-2;Q8VE88	Q8BH43;Q3T9Z7;Q80UQ8	P97868-2;P97868	A2A6A1;A0PJ58							Q8BYK6-3;Q8BYK6;Q7TN20;Q8BYK6-2;Q8BVC6	Q8C1L7;Q9CQR2	Q4FJQ6;Q3U3L3;Q60854;F8WIV2;K7E6F1;E9Q108;E9Q0P9	Q922J3;D3Z2Z1;F8WIA1;Q922J3-2;D3Z3M7;F6RCU2;Q8C0S5					Q8C4N0;Q91WR9;Q3TMN9;Q9JJK5;Q6A0E4
	P62274	Q8C9B9	Q9DCT1;Q8CEB6	Q60520;Q60520-1	Q99J21;Q99J21-2	Q8BIV6;G5E895;Q8CI22	P51655	Q3TMB8;P54822;E9Q242;E9Q3T7	Q6PE15-2;Q6PE15;F6X5P5	Q8C2Q3;Q3U6A2;E9QL13;Q8C2Q3-2;Q62019	Q9Z2C9;G3V027;I6L9A6;G3UYB7;G3UYZ2	Q544U7;Q9ERI2		A2AS45;Q68FH0-2;Q68FH0;A2AS44;Q05D18;Q3UIX3;A2AS47	O55042-2;O55042	Q6ZWZ7;Q9CPR4;Q505B1;Q80V08;Q6PHZ1;B2RY53	E9Q7L3;D3Z1W6;E9Q7L2;D3Z1N4;E9Q4Y5;F8VQD1;Q8BSQ9-2;Q8BSQ9;D3YYF2;D6RIL0;D6RI94;D3Z3R4;F6THL5	Q91WE4						Q9QXY6;Q8R0V6	Q4V9T8;P48024;Q3UBT8;J3QN87	Q3V1M8;Q3U4Z7;Q8VDJ3;A0A087WP83	P56480	Q9D8Y1							Q5U452;Q99PW4	E9PXM6;A8VP81;Q3TCZ2;Q3UJY1;Q9JIM1-2;Q9JIM1;E9PWY7	E9PXM6;A8VP81;Q3TCZ2;Q3UJY1;Q9JIM1-2;Q9JIM1;E9PWY7	A2AL50;Q8C0I1;H3BKN2;A2AL49					Q3UY34
	P62862;Q642K5;Q3THB2;Q920W8;Q91V99	Q9EQS3;Q3V1X1;Q8C5M8;A2A7K5	Q60520;Q60520-1	Q8C6F3;G5E897	O88291;D3YXQ7	Q8R1Q3	Q8R3P6;Q8R3P6-2	S4R225;Q8K412;Q32P16;Q91V09	Q8VDM1;F7C2Y9	Q6NXZ0;Q3UDD5	Q8CJ40;Q8CJ40-3;Q8CJ40-2	Q8BU25		Q8R3I2-2;Q8R3I2;Q8R3I2-3	Q3THG9;A2A4P3;A2A4P4	Q8C4Q6;Q8C4Q6-2	Q91WT7	A2ACP1-2;A2ACP1						Q571M4;Q8VC28	Q9JJV2-3;Q9JJV2;D3YWS3;Q9JJV2-2	Q9DBF1-2;Q9DBF1;G3UYR8	Q9Z2I8;C6EQH3;Q9Z2I8-2	D3Z4P2;P59481							Q9CRC6	Q8BFZ3	G5E924;Q3UMT7	Q8C076;P59016					Q3U8Y7;Q3TKG4;O88685;Q3TKC2;A2AGN7;B7ZCF1;A0A087WPH7;Q3UD94
	O35381;D3Z7M9;D3YYE1;F6UFG6	Q5FWJ9;Q3UDG5;Q3U2X1;Q3TFE2;Q63850;Q3UGJ7;Q3THR9	Q543Q4;P35276;Q8BP17	Q9R0M7;Q91X42	B2RRS4;E9PWV7;Q923K4;D6RDC6;Q923K4-2	Q5SUR0	Q80WM4	Q8BK48	Q91VM2;P62320	P97300;P97300-1;H3BIX4;Z4YLB7;P97300-3	Q99K41;Q3U254;Q3USG5;Q3UUU0	Q6P6M7;Q3U597		Q542R8;O70443;Q3UYF9	Q9Z2Q6;B7ZNM7;Q52KH2	A0MNP4;Q9ERF3;Q8BVQ0;D6RDC7;D6RJ72;Q8BKW0	E9Q512;H3BJG4	Q3ULB1;Q921W7;P47226-2;P47226						Q8C0W0	P70335-2;P70335	Q8K0C9	Q6PGL7;Q6PGL7-2;Q8BRP9	Q6PAV2-2;Q6PAV2							O35295	Q8BH04;Q8R3X7;Q3UGF0	Q8BH04;Q8R3X7;Q3UGF0	A1L3B8;P26516					E9Q5N7;B2RX09;Q6ZQ25;E9PUN0;Q3UGZ9;E9PUM9;E9Q7X7
	P54775;Q569X4;Q3TFA5;Q8BKU2;Q3TJ97;Q3UBF0;Q52L53	Q5F239;P62254;D6RES1	Q9R0M7;Q91X42	Q9D927	A2APY7;A2APY7-2	P08030	Q8BK48	D3YXH0;P63054	Q9DCJ1	Q3TT51;P12961	P26339;Q3UN28	A2AEM2;Q99LI2		P70227	Q9Z2I8;C6EQH3;Q9Z2I8-2	P14576	E9Q616	Q7TNE3						Q9JL18	Q8CH18;Q8CH18-3	Q6PGL7;Q6PGL7-2;Q8BRP9	Q9DCM0	Q9EPK7-2;Q9EPK7;E9PUW7							Q5GQ64;Q9Z0F7	D3Z6P0-2;D3Z6P0	D3Z6P0-2;D3Z6P0	Q6P5F9					Q3UCK1;Q3UA94;O55236;Q3TUK6;Q9DCC1
	Q3UW32;Q9EST5;Q9EST5-2	Q99KD6;Q3UDK5;E9PZS8;Q61387;Q3U7R2	Q80XN0;D3Z2Y8	P26339;Q3UN28	Q9DCB1	O88587-2;O88587	Q99K70	A3KN68	Q9CPT4	Q3UN47;O08600	Q11011;E9Q039;F6QYF8;E9Q6F4	Q9Z2C9;G3V027;I6L9A6;G3UYB7;G3UYZ2		Q8CJ40;Q8CJ40-3;Q8CJ40-2	Q9Z0H8-2;Q9Z0H8;Q6A090	Q3U102;Q925F2;Q05CZ9;D3Z5Y0	F7BJK1;Q2TJI9	B2RTB0;Q3UHX2;Q1WWJ8						S4R1W1	Q8R2Y2;Q8R2Y2-2	Q3UHL7;E9QN70;B9EKB0;P02469;Q9CRX6;Q8K271	Q3SXD3	B6YY24;Q3UVG3							Q5SUR0	Q6ZQ47;Q3UYC8;A2BDX0;Q5BL11;Q5RKY4;Q9Z103	P18608;D3Z607;Q8CEW1	Q7TPX2;Q3UN31;Q3U613;P97819-2;P97819					Q8R1V4;Q5SVW9
	Q80VP1;Q80VP1-2	Q68G54;Q9QYB2-2;Q9QYB2;Q3UTV2	Q8CG03;Q8BJ62	A3KN68	Q3TT51;P12961	E9Q509;Q3UEI4;G3X925;Q3UEH4;P53657;A7MCU9	Q9D1F4;E9QKI5;E9QKI4;D3Z4R0	P51655	O08553	Q1WWK3;P43276	Q8VH34;Q3TX84;Q3TA96;Q9DC13;P11438;Q922T9	Q91YL3		Q9QXY6;Q8R0V6	A7VJ98;Q9CQI3;Q80X87	Q3U6D7;O55100-2;O55100	Q61292;Q3USI2	Q8K2C7						Q3TCD4;Q9WUR2-2;Q9WUR2;E9PYC6;E9Q858;E9PUY9;E9PYA9;E9PVM6;E9Q7A8	Q3UHW2;Q3TT11;P51660	Q3THA6;Q8BL97-3;Q8BL97-4;Q8BL97-2;Q8BL97	Q6ZQ47;Q3UYC8;A2BDX0;Q5BL11;Q5RKY4;Q9Z103	E9QAQ7;A2BH40-3;A2BH40;A2BH40-4;A2BH40-2							Q8CH18;Q8CH18-3	Q3UBP6;Q3UBQ4	Q91WQ3	Q3TEB9;Q6NX62;Q6PCW8;Q546F8;Q571G2;Q9D753;F6SGT4;D3YYN3					Q6RI64;O09061
	Q9QUM9;E0CXB1	Q3V214;Q80UW8;Q8R0H0	P42232	Q3THU8;Q8VEM8;G5E902;Q3UB63;Q3U995	Q60749	Q8BLI4	P58022-2;P58022	Q9DCN2-2;Q9DCN2;Q9CY59;F2Z456	P12815;Q8C5M4;P12815-2;Q3UGE5	P17751;H7BXC3	Q9QWR8	Q9D1F4;E9QKI5;E9QKI4;D3Z4R0		Q3TLP5;Q3TLP5-2;F6YTG0;Q3TLP5-3	O55222	O35226;Q9CY29;O35226-4	A0A087WS27;D3Z5S8	Q3TQZ7;Q80W82;Q80W81;Q78GB8;Q8C9D4;Q80W80;E9QN59;Q61831-2;Q61831;Q544A0;A6P3E4;Q7TSJ7;G3X8U9;Q91Y86						Q71FD5	P63242	A0PJL3;Q6PDS3;Q6PDS3-3;Q6PDS3-2	A0A023T778;Q9CQL1;P61327;G3UZW7;G3UYI5	Q78ZJ8;A0A068BFR3;P46638;G3UY29;E9Q3P9;F8WGS1;Q0PD45;P62492;G3UZD3;Q3UZ37;G3UZL4							Q545L9;F7D432;E9PWE0;E0CYV0;P23506;P23506-2;Q8BPI6;F6V9F1	Q8BTX9	P68372;Q9CVR0;Q9DCR1	Q6RI64;O09061					Q9R0A0;Q9QX52
	Q91VZ6;D3YVX4	Q3UDM8;Q8VEE0;B2KGF0	Q9JL18	Q543Q4;P35276;Q8BP17	Q3UWS9;Q3U7H9;P99029-2;P99029;G3UZJ4;H3BJQ7;Q9D6X2	K3W4Q9;Q8BH60-2;Q8BH60	Q3TMB8;P54822;E9Q242;E9Q3T7	Q9D1F4;E9QKI5;E9QKI4;D3Z4R0	Q91VH6;Q3TWT2	Q6P1A9;Q5EBG5;Q58ET1;Q80UT7;P12970	Q8R0Q6;Q3UHG5;Q6PDN6;Q62283	P10649;A2AE89		Q4VA93;P20444	Q9D0J4	Q9JKX6;A2ATT5	Q9JM76;H7BWZ3;D3Z2F7;D3Z2F8	Q8K0G5							Q3TKY6	Q9D031;Q01730;Q3TFN7;A2AUR7;Q9CSE4;Q9CUS2	A0PJL3;Q6PDS3;Q6PDS3-3;Q6PDS3-2	Q9DBZ6;Q3U645;P55096;Q3UNS0							A2ALV3;Q62420;Q8BXU5;F6ZL13	Q91WQ3	Q8BTX9	Q61112;Q61112-2					Q3U9G2;P20029;Q3TWF2;Q3TKF8;Q3TI47;Q9DC41;Q3U7T8;Q3UEM8
	G3UVU2;Q7TN25;D3YW09;Q62203	Q91YQ8;O09174;Q3TUS8	Q3TMB8;P54822;E9Q242;E9Q3T7	A2ASR7;A2ASR8;Q3ULL2;Q2LC58;P25916	O35218;Q3UGU6;Q3US33;Q3URN8	Q9DCB1	A2ARP8;Q9QYR6;Q9QYR6-2	Q5SUC8;P52624;E9Q5K7	Q1WWK3;P43276	P62918;Q3UJS0;Q3THC7;Q9Z237	P10649;A2AE89	Q9JL18		P24638;Q3UZN1;Q3U4F3	Q3UD26;O35593;Q9CSU2	Q7TMK9-2;Q7TMK9;G3UZI2;G3V018;G3UZ48;G3UXJ6;G3UWM1;G3XA76;G3UXU5;G3UY67;G3UYK7	O08807	Q8K3K8							Q5F2E7;Q5F2E7-2	Q5XJY5;Q3U4S9;Q8R1S6;Q3TDU1;Q8C0G7	Q80Y09	Q3U311;Q03157;Q3TCA7;Q3TUB1							B2RRH9;Q3THK7	P18608;D3Z607;Q8CEW1	Q3UBP6;Q3UBQ4	Q9JIH2					Q9DAI2;Q3TV16
	Q5M8N4-2;Q5M8N4	Q8K0E9;Q9DBB8	Q544B1;Q3UJW1;Q3U9J7;Q3TVM2;P47738;Q3U6I3	Q80Y14	Q3V275;Q99N23	A0A087WRE5;Q6P3D0	S4R225;Q8K412;Q32P16;Q91V09	E9Q1Q9;P97328;Q9CPP1;D3YVB6	Q3V275;Q99N23	Q545F0;P34884	Q8R015;Q3TB02;Q8R015-2	Q99M47;Q3TPJ9;O08738;Q9D089		Q8VCF9;Q8BN51;Q9R088	Q60865;Q3UFZ6	D3Z0L4;Q9D9P1;S4R238	Q8K221	Q9EPC1;Q3UF75;Q8C5R4							Q9CXI0	Q80Y09	Q14AQ1;P62334;Q8QZS9	Q3TB79;Q8C2J1;Q80Y25;Q3UDG8;Q3TI07;O35350;Q3UF24							Q3U781;Q9D6W4;P84104-2;P84104;A2A4X6	P68372;Q9CVR0;Q9DCR1	D3Z0F5;Q3UIT2;O88545	P14685;Q8BK46;Q3ULJ5					Q540I4;Q3TJS0;O08917;G3UYU4
	Q5U438;Q5SQB7;Q61937;Q9DAY9;Q5SQB5;Q5BL09;Q3U536;Q8BSZ3;E9Q5T3	Q5FWX7;Z4YJX3;Q8VDM5;Q8R0G3;E9Q6C1;F6UHR6;E9PXZ2;A2A8Z1-2;A2A8Z1	Q9D927	B1AY10;B1AY10-2;B1AY10-3	A2AD84;A2AD85;Q99JT2	Q91V64;Q9D096	Q3TAJ6;P58854;Q3TN67;Q80U29	Q80YA7	Q91WM2	Q544Y7;P18760;F8WGL3;Q9CX22	Q6P6M7;Q3U597	P98063;Q6P550;Q570Z4		Q3TCD4;Q9WUR2-2;Q9WUR2;E9PYC6;E9Q858;E9PUY9;E9PYA9;E9PVM6;E9Q7A8	Q60932-2;Q3U6K8;Q3TIG8;Q3THL7;Q60932;F2Z471	B2CY77;P14206	E9QN52;Q91WK0-2;Q91WK0	Q80TA1;Q9D4D0							Q61935;A0A087WRZ7;Q545G5;E9PWG4;Q6PCW9;Q545T7;P05977-2;P05977;P09542	Q8BWT1;Q3UKH3	Q3UHL7;E9QN70;B9EKB0;P02469;Q9CRX6;Q8K271	P70302							Q3UM45	Q3UHZ7;Q3TAD4;Q91YN5-3;Q91YN5;Q91YN5-2	Q6ZWM4	Q9CVB6;Q3UA52;Q4FZG5;D3YXG6					Q69ZX3;E9QPE7;Q8R384;O08638;O08638-2
	Q8K0E9;Q9DBB8	Q3UW32;Q9EST5;Q9EST5-2	Q80Y14	Q8CJ40;Q8CJ40-3;Q8CJ40-2	P60824;K4DI65;D3YU80	Q99J57;Q3THS6;Q3TSS0;Q3UZA2;Q3TED1;Q3UAP7;Q6PE05	Q80YA7	Q3TKN7;Q8JZY2;Q3UTM6	Q9CQE1;B1AWZ5	Q5EBP9;Q62318;Q3UDN8;Q62318-2	Q9DCT1;Q8CEB6	Q9ER41		S4R1W1	Q9DAB3;Q9CQW2	E9Q7L3;D3Z1W6;E9Q7L2;D3Z1N4;E9Q4Y5;F8VQD1;Q8BSQ9-2;Q8BSQ9;D3YYF2;D6RIL0;D6RI94;D3Z3R4;F6THL5;Q9D7L7;D3YYG4;D3Z1M8;Q8R134	E0CYJ0;E0CXA9;Q3UGM5;Q6PEB6;G8JL35	Q5M8Q0;Q3U7D2;E9QAZ2;Q9CZM2							Q5M9N5;Q5M9J8;P41105	A0A087WQS0;A0A087WQM0;E9Q0S6;A0A087WRU0;A0A087WQ94;Q3U0Q9;Q7TSV1	Q8QZV7;F6W761	E9Q8N5;Q08EB6;Q08EB5;F7DCH5;B9EJA4;Q8BRT1;A2RRR3							Q3UDM8;Q8VEE0;B2KGF0	B7ZC46;B1AQY9;B1AQZ0;Q8CHH9;Q8CHH9-2	Q6ZQ47;Q3UYC8;A2BDX0;Q5BL11;Q5RKY4;Q9Z103	Q8VC31;G3X927;D3YW42					Q68FH8;Q61466-2;Q61466
	Q91VM2;P62320	Q8C2T9;Q9Z1M8;Q3TJY5;Q8CDT0;Q8C7D0	Q99K01-2	Q99K01-2	P61022;B0R091	G3UXL2;Q9D7G0;Q3TI27;Q3UPD5;Q3UYQ0	A3KN68	A2VCS7;E9PWM3	Q3V235;O35129;F6QPR1	P59266	P17156;B7U582	Q0PD14;Q8BHC1		Q71FD5	Q9R1P0;Q3TL95;Q3UCF0;E9PW69	Q0VBU4;Q9D024-2;Q9D024;F7C265;Q9D024-3;B1AR93	F8WHT3;Q7TPM1;F7AYW2;A2AN33	A2A5N2;Q9CQV8;A2A5N1							Q9EQF6	P68369	A7YY80;D0VYV7;B6ZHD1;V6BQR3;Q8BGK4	Q3TLS3							Q9WUM5	D3Z0F5;Q3UIT2;O88545	Q3THA6;Q8BL97-3;Q8BL97-4;Q8BL97-2;Q8BL97	Q14A47;Q8K003					Q3UC02;Q9DB79;P62281;Q9D0P6
	Q5SZA3;P15864	Q5SZA3;P15864	Q9EP52	Q80XN0;D3Z2Y8	Q60I30;Q9D892;Q3U589	Q9JKF6	E9Q1Q9;P97328;Q9CPP1;D3YVB6	Q549D0;Q3UC80;Q8BT06;P41731	E9QB01;P13595-2;E9Q589;P13595-3;P13595-4	P46737;P46737-2	Q9DAK9	Q62426		Q548L0;Q3UJ69;Q61624;Q91XQ8;Q8CB43	Q3TKM5;Q3TGZ3;P70404;Q684I8	Q99JY0;D3YXU1	B2RSU7;E9PWI6;Q8CHG3;E0CYI9	Q8C4C9;Q9QYI4;D6RHR9							Q91VR5;Q922B8;Q3V1Z7	Q9Z2I8;C6EQH3;Q9Z2I8-2	P30416;F6S2D5;D6RDE2	E9QMU3;D3YWN7;O88735-2							A3KML3;P68254;F6VW30;P68254-2;F6YY69	Q6ZWM4	Q9R1P0;Q3TL95;Q3UCF0;E9PW69	B7ZN44;A5CVE4;I1E4X8;B2RQE3;P83093;Q8BIM2;F6WBP9					G3UYV7;Q059I1;P62858
	Q5EBJ0;P11404	Q99MR6-3;Q99MR6-4;Q99MR6-2;Q99MR6	Q571E4;Q8CC47	Q9JL18	Q9JLB9;Q9JLB9-3;Q9JLB9-2	Q99K28;Q99K28-2	Q9DCN2-2;Q9DCN2;Q9CY59;F2Z456	Q0PD63;P63011	Q6ZWZ4;Q5M9L1;P47964	Q3U1S6;Q91W50;Q8JZN2;Q80TP8;Q3U4S7;Q3TXH7;Q8R3R1;Q3U672	P68404-2;P68404	Q3TXR9;P20060		Q3TMH2	Q64737;Q3UJP8;Q3TH49;Q64737-2	Q3TWG5;Q8R1Q8;Q3TVT4;A2VDF8	Q3TJ01;Q99LF4	Q8BLQ6;Q9DB50;Q3TIV9							Q8BH04;Q8R3X7;Q3UGF0	Q3SXD3	A0A087WQS0;A0A087WQM0;E9Q0S6;A0A087WRU0;A0A087WQ94;Q3U0Q9;Q7TSV1	Q9CXK3;Q497E4;P68033;Q3UIJ3;Q3TG92;Q61275;P68134;Q61264;Q61272							Q9Z315	G3XA13;Q99NH2;B2RUK1;B7ZNY3;F6S7Z1;A5D6P2;Q99NH2-2;E0CXR8;E0CZE2;E0CZ83;E0CXL4;Q99NH2-4;Q8BPQ6;Q8BPQ4;E9PYJ2;F6TSJ9;Q99NH2-3;E0CX45;E0CY24;Q99NH2-5;F6UGU7	B7ZC46;B1AQY9;B1AQZ0;Q8CHH9;Q8CHH9-2	Q80W65					Q69ZU4;A0A087WRB7;E9PX43;Q7TQG1;Q3UEX8;A0A087WP13
	Q99JR8-2;Q99JR8;Q3TXH6;Q3TM59	Q9QUM9;E0CXB1	Q3ULN8;Q6PD03	Q544B1;Q3UJW1;Q3U9J7;Q3TVM2;P47738;Q3U6I3	Q3U8Y7;Q3TKG4;O88685;Q3TKC2;A2AGN7;B7ZCF1;A0A087WPH7;Q3UD94	O35218;Q3UGU6;Q3US33;Q3URN8	D3Z6J0;Q6SKR2;Q6PRU9;Q4KMV5;E9PXT7	P24638;Q3UZN1;Q3U4F3	P40142	Q8VDC3;P28271	Q91WD9	Q52L66;Q91W67		Q14BZ3;P70202	Q9DB05;Q9CXX1	G3X8R2;Q80VJ2	B1AUN2;B1AUN3;Q3UKV0;A4FUS0;A0AUM9	Q9JIH2							Q99NF7;Q5BKS2	P30416;F6S2D5;D6RDE2	Q8BH04;Q8R3X7;Q3UGF0	Q9EP53-4;Q9EP53-3;Q9EP53-2;Q9EP53							Q9EQS3;Q3V1X1;Q8C5M8;A2A7K5	Q9R1P0;Q3TL95;Q3UCF0;E9PW69	G3XA13;Q99NH2;B2RUK1;B7ZNY3;F6S7Z1;A5D6P2;Q99NH2-2;E0CXR8;E0CZE2;E0CZ83;E0CXL4;Q99NH2-4;Q8BPQ6;Q8BPQ4;E9PYJ2;F6TSJ9;Q99NH2-3;E0CX45;E0CY24;Q99NH2-5;F6UGU7	B2RQ14;Q8CDA1					Q922H9;Q922H9-2
	A1L367;A1L366;Q61550;Q3UTE4;Q3TG35;Q6ZQJ6	Q8C1D8	Q9DC69	I1E4X5;Q8BWQ6;D3YW20;D3YW19;Q8BWQ6-3	Q3U6U7;P32921-2;Q3UDG2;Q4FJZ4;P32921	E0CYX9;Q3TC33;E0CYP1;Q3TC33-2	Q5SUC8;P52624;E9Q5K7	A2AEM2;Q99LI2	Q58EA6;P62852	P57774	E9Q1Q9;P97328;Q9CPP1;D3YVB6	E9PXB7;G3X9H8;Q3TQK9;Q8CFI0-3;Q8CFI0;Q641N8;Q8CFI0-2		Q9ER58;F6SLR4;Q80U51;Q6PAN0	Q99JF8;A2BI12;Q99JF8-2;Q05CD2	Q8K221;D3Z2F3;D6RHM6;D6RI79;H7BWZ6	Q4FJY3;Q62313	P46414;Q4FJM2							Q6PIU9	Q14AQ1;P62334;Q8QZS9	Q8BWT1;Q3UKH3	Q6T5E4;A2IQH4;Q8BK09							Q03265;D3Z6F5	Q9EQF6	Q3UHZ7;Q3TAD4;Q91YN5-3;Q91YN5;Q91YN5-2	P63028;D3YU75					Q9WUP7-2;Q9WUP7;A0A087WP81
	Q99KD6;Q3UDK5;E9PZS8;Q61387;Q3U7R2	D3Z687;Q9DCT6-2;Q9DCT6;F8WH46;F6XN97;A2CF80;A2CF83;Q9DCT6-4;Q9DCT6-3	Q8C6F3;G5E897	Q571E4;Q8CC47	B2RUD2;Q811S7-2;Q811S7	B2RXY7;P48758	Q3TXV7;Q3TW10;P29416;Q3THQ0;Q8BNS6;Q3UCP6;Q3U936;Q3TVI2;Q3TKF6	Q3TXV7;Q3TW10;P29416;Q3THQ0;Q8BNS6;Q3UCP6;Q3U936;Q3TVI2;Q3TKF6	P67778;Q5SQG5;Q3TV00	Q62418-3;Q62418-2;Q62418	Q62426	Q9EP52		Q8C6F3;G5E897	Q03517	Q8R3I3	Q9JHH9;Q9CTG7;F2Z4A2	P63094;Q6R0H7;P63094-3							Q9DAB3;Q9CQW2	Q3UZ63;Q3UL31;Q6NZF1;Q3TIV2	P68369	Q8K133;Q0PD31;P35290							P62843;Q3UK70;Q3UXS6	Q9ER73;A2A414	P97300;P97300-1;H3BIX4;Z4YLB7;P97300-3	Q9JKR6					E9Q2B2;Q5PRE9;Q5RIM6;Q60974-2;Q60974;F7C134;Q8VDE8;E9Q9Y2;Q8CHB6
	Q3UMP2;P38060	Q5U438;Q5SQB7;Q61937;Q9DAY9;Q5SQB5;Q5BL09;Q3U536;Q8BSZ3;E9Q5T3	Q8CJ40;Q8CJ40-3;Q8CJ40-2	Q6NSU3	Q3ULW0;P62827;Q14AA6	Q3TUQ5;O35691;Q9CV89	A2VCS7;E9PWM3	Q62426	Q3U8Y7;Q3TKG4;O88685;Q3TKC2;A2AGN7;B7ZCF1;A0A087WPH7;Q3UD94	Q3TF14;P50247;Q3U4D1;Q5M9P0;Q3U5U5;Q8BPI7	E9PXB7;G3X9H8;Q3TQK9;Q8CFI0-3;Q8CFI0;Q641N8;Q8CFI0-2	Q8BGE6		Q8R3G9	Q3U102;Q925F2;Q05CZ9;D3Z5Y0	Q3TND1;P45878;Q3UND3	P63254;Q8C2N7;Q6P3B4	Q61735-2;Q3U967;E5Q371;Q61735							A7YY80;D0VYV7;B6ZHD1;V6BQR3;Q8BGK4	Q6ZWZ2	Q3V275;Q99N23	Q3TMB8;P54822;E9Q242;E9Q3T7							P28659-4;P28659-2;P28659-3;P28659	P42208;E9Q3V6;F6WYM0;D3YYB1;D3Z3C0	Q14AR0;Q9D8T7;F8WHU8;Q9D8T7-2	E9PU87;F6S7W6;Q6P4S6;F6U6U5;F6U8X4;Q6P4S6-2					Q9R0Q6
	Q8C9B9	Q91VM2;P62320	A2ASR7;A2ASR8;Q3ULL2;Q2LC58;P25916	P17156;B7U582	Q91WK1	Q3TFP0;Q3UDH7;Q3UA07;Q3UYX6;Q9R0U0-3;Q9R0U0-2;Q9R0U0	Q62426	D3Z6J0;Q6SKR2;Q6PRU9;Q4KMV5;E9PXT7	A4FUS1;P14131;Q641N3;Q5CZY9	Q99M46;P97760;Q9DB22;Q3UUX3	P98063;Q6P550;Q570Z4	P51655		P56376;Q4VAF0;E9QJT5	Q542Y0;Q64669;Q99KL8	Q4FJY3;Q62313	Q0VDL6;Q04899;Q0VDL5	S4R1X1;Q7TMQ7							Q9D881;P19536	A7YY80;D0VYV7;B6ZHD1;V6BQR3;Q8BGK4	Q62417-2;Q62417;Q62417-7;Q62417-5;Q62417-6;Q62417-4;Q62417-3	O08601;O08601-2;Q3UWK4							Q8R326-2;Q8R326	Q14AR0;Q9D8T7;F8WHU8;Q9D8T7-2	Q9EQF6	F6RPJ9;Q8CGB9;Q9JHR7					D3YXZ5;Q91WT8;Q91WT8-2;D3Z113
	Q3UAT9;Q3U9N8;P24547;Q3UPJ2	P70158	I1E4X5;Q8BWQ6;D3YW20;D3YW19;Q8BWQ6-3	Q3TMB8;P54822;E9Q242;E9Q3T7	D3Z1N9;F6YH22	P97930;Q6GRA7;P97930-2	P24638;Q3UZN1;Q3U4F3	Q14BZ3;P70202	Q8CE50	O88291;D3YXQ7	Q52L66;Q91W67	Q8BKR5		Q9JL18	Q3UVN5;Q9CZ44;Q9CZ44-3;Q3KQQ1;A2AT02;Q9CZ44-2	Q544I1;Q8VCV2;Q9QYF9;Q8CBD0	Q80XL6;D3YTQ5	Q8CI32							Q3SXD3	Q3UHZ7;Q3TAD4;Q91YN5-3;Q91YN5;Q91YN5-2	O70305-2;E9QM77;O70305;O70305-3;F6U2C2;Q3UX07;F7B6X4;Q3UX51	Q9Z0P5-2;Q9Z0P5							E9QLB8;Q566J8	P97300;P97300-1;H3BIX4;Z4YLB7;P97300-3	Q5FW97;P17182	Q3TFE8;Q7TSZ6;P70168;Q3UHW8					Q4FK54;P61290;A2A4J1
	Q5F239;P62254;D6RES1	O35381;D3Z7M9;D3YYE1;F6UFG6	Q99KI0	Q9DCT1;Q8CEB6	P46471;Q3UIH5;Q8BVQ9;Q3U5V3	A2AD84;A2AD85;Q99JT2	A2AEM2;Q99LI2	D3YX15;Q61153;D6RDQ6	Q3UGV7;G5E8R8;Q6P5G6	Q3ULG4;O35226-2;O35226-3;O35226-5	Q8BKR5	E9Q2W8;Q9D920		Q8R121;Q8R121-2	Q8C650-2;Q8C650	P61961;H7BWZ1;D3YW97	P61961;H7BWZ1;D3YW97	Q6P5D3;Q6P5D3-4;Q6P5D3-2							P70333	Q9ER73;A2A414	Q3UBU9;Q62446	Q91XB7							P80316	D3Z589;D3YU22;D3YU59;Q3UH68-3;Q3UH68;Q8CGB7;Q3UH68-2	P42208;E9Q3V6;F6WYM0;D3YYB1;D3Z3C0	Q3UHW9;P45591					Q3B7Z2;Q3B7Z2-2
	Q63844;D3Z3G6;Q3U2H3;D3Z6D8	P62274	Q9CZ62-2;Q9CZ62;Q8C1I9	Q9EP52	Q5FW97;P17182	P05063	Q0PD63;P63011	Q5SW83;P61161;Q8BMA4	Q9CWI9;Q9CZI5;P62267;Q9CSN9;Q497E1	Q61176	Q99M47;Q3TPJ9;O08738;Q9D089	Q543M3;Q3UHZ4;Q3U5U9;Q3TT75;P06797;Q3UWH6;Q9D0C0;Q3TVJ1;Q3TNC8		P97807-2;P97807	Q9CWW6	Q8WTY4;E0CYY1;F7BWP1;F8WIK0	P14152	Q80W22							Q6P6I7;A2AL12;Q5FB19;Q3UZG3;Q8BG05;Q5U3M2	Q62417-2;Q62417;Q62417-7;Q62417-5;Q62417-6;Q62417-4;Q62417-3	Q3UZ63;Q3UL31;Q6NZF1;Q3TIV2	Q3U0D7;P62331							Q9CR68	Q3TLE4;Q8BQ46;F6QCI0	P60670;Q3UE06;Q3UDU9;P60670-2	Q78KL9;Q3TAV0;Q3UD20;Q3T9B4;Q9D8S4					Q9CXR1
	Q8BTS4	Q8VDB7;Q8VDB3;P63015-2;A2A409;Q8VDB6;Q8VDB4;Q8VBY9	Q3V169;A2N6K9;E9Q046;O35706;L7N265;D3Z452;Q62183;E9Q2X0;Q99206;Q8C5S9;Q80YU2;Q80W76;Q62184;O35703;E9PYJ0;B2RUN1;Q8C641	Q9DC69	Q3UC10;Q3ULG5;Q542I2;P97311	Q99KG3-2	Q3TKN7;Q8JZY2;Q3UTM6	Q91WD9	Q9JJV2-3;Q9JJV2;D3YWS3;Q9JJV2-2	P62342	Q543M3;Q3UHZ4;Q3U5U9;Q3TT75;P06797;Q3UWH6;Q9D0C0;Q3TVJ1;Q3TNC8	Q11011;E9Q039;F6QYF8;E9Q6F4		Q99KI0	Q4FZH2;P61255;B1ARA3;B1ARA5	Q3U6L3;Q9QUH0;Q9D6F8	Q8BMP6;Q6P9T6;Q3TJW1	Q3UB66;Q0PD67;P62821							Q6P1B6;Q6NZN9;Q8BH69	D3Z589;D3YU22;D3YU59;Q3UH68-3;Q3UH68;Q8CGB7;Q3UH68-2	Q9D031;Q01730;Q3TFN7;A2AUR7;Q9CSE4;Q9CUS2	G5E866;Q99NB9;Q3US00;A0JLN0;Q3UIB4							A2AEX8;A2AEX6;P97447;A2AEX7;A2AEY1;A2AEY2;P97447-2	Q8BQ47;D3Z0T5	Q9ER73;A2A414	Q3UFY7-4;Q3UFY7;Q3UFY7-2					Q61177;Q60737;Q9D0E8;Q8CD20
	P60879-2	Q80T06;Q91VK2;P57776;E9QN08;D3YY68;D3YUQ9;D3YZT9	Q3UUH0;Q91YI0;E0CXM2;E0CY49	Q64521;A2AQR0	Q99NF7;Q5BKS2	Q564F4;Q3TII0;P80315;Q3UJZ8;G5E839	Q549D0;Q3UC80;Q8BT06;P41731	P98063;Q6P550;Q570Z4	Q9R062;Q3TWR9;K3W4S6;V9GX26	B2M1R7;Q61990;Q61990-3;Q3TF69	Q8BU25	Q3TCD4;Q9WUR2-2;Q9WUR2;E9PYC6;E9Q858;E9PUY9;E9PYA9;E9PVM6;E9Q7A8		Q64521;A2AQR0	Q5FWJ9;Q3UDG5;Q3U2X1;Q3TFE2;Q63850;Q3UGJ7;Q3THR9	Q9DBG9;B1AUD9	Q99J77;Q9JJH0;Q3TFB5	Q61133							Q8VBT9;Q8VBT9-3;Q8VBT9-2	Q3UBU9;Q62446	Q9WV98	Q9ESP1							Q3TLQ4;P58064	Q3THA6;Q8BL97-3;Q8BL97-4;Q8BL97-2;Q8BL97	Q5NC81;P15532;Q5NC80	Q564E2;Q3TI99;P06151;Q3TCI7;Q3UDU4;G5E8N5;D3Z736;Q99K20;Q3THB4;D3YZQ9					E9Q7B0;Q60715-2;Q3TTT2;Q3TN84;Q60715;Q3UF16
	Q0VDQ3;Q9D733;Q9D6X7	Q3UMP2;P38060	Q6NSU3	D3YXH0;P63054	Q7TMK9-2;Q7TMK9;G3UZI2;G3V018;G3UZ48;G3UXJ6	Q3TST0;Q8K1R3;Q3UNL5;Q3TN29;Q8K1R3-2	Q14BZ3;P70202	Q3TDA1;Q8BX94;Q571D2	Q8BQ47;D3Z0T5	O88587-2;O88587	Q8BGE6	D3Z6J0;Q6SKR2;Q6PRU9;Q4KMV5;E9PXT7		P47867	Q4KL81;P63260;Q3TSB7;Q3UD81	Q99LL5;E9QAL6;Q9CTC0;Q9CSK2;Q8BW04	Q3TF41;Q8BSH9;P28656;E9PW66	Q3TEF1;P97494;Q3UNA7							Q80TZ3;Q80TZ3-2;Q80TZ3-3	Q8BH04;Q8R3X7;Q3UGF0	Q52KC5;Q9CQP3	Q9Z2X8;Q05DM3;Q3UWI4							Q9CSU0-2;Q9CSU0;Q9CSU0-3;F6YB25	Q3UZ63;Q3UL31;Q6NZF1;Q3TIV2	Q9D6F9	Q3TM92;Q91W96;Q3TI31					E9PUC4;Q6NSW3-2;Q6NSW3;Q6NSW3-3;Q6NSW3-4
	Q91YQ8;O09174;Q3TUS8	Q0VDQ3;Q9D733;Q9D6X7	Q9JIS5	D3Z5I1;Q3UPF5-2;Q3UPF5;G3X9X5;Q8K302	O09131	Q9R1Q8;Q9D6K2	D3YX15;Q61153;D6RDQ6	A2AKH7;Q8JZX5;Q9CSK4;Q9D1G5	Q91YJ5;Q5M6W7;F6RR02	Q58EA6;P62852	Q3TCD4;Q9WUR2-2;Q9WUR2;E9PYC6;E9Q858;E9PUY9;E9PYA9;E9PVM6;E9Q7A8	P47867		B2RUS7;Q8BNE2;Q6PGE2;Q9Z2P1	Q01853;Q8BNF8	Q8VBT9;Q8VBT9-3;Q8VBT9-2;A2AC05;F7CRQ2;A2AC02;A2AC03;A2ABZ8	Q3U6L3;Q9QUH0;Q9D6F8	Q7TNI6;Q923U0;A6PWP3;Q923U0-3							Q6ZWZ2	Q3V275;Q99N23	Q3UHZ7;Q3TAD4;Q91YN5-3;Q91YN5;Q91YN5-2	Q3TBF1;Q08642;A3KME9							Q4FZG2;Q545P3;P46656;Q3UG56	Q3U781;Q9D6W4;P84104-2;P84104;A2A4X6	Q3UCC5;Q6P8I4;F8WI88;Q3TM89;Q3KQH9;D3YWA4	Q3UNZ1;Q99J23;Q3TT56;Q3UXS5					B7ZN44;A5CVE4;I1E4X8;B2RQE3;P83093;Q8BIM2;F6WBP9
	Q8CFZ2;Q62030;E9Q4D0;F6XJP7;H3BJL4	Q8QZV7;F6W761	A2VCS7;E9PWM3	Q9CZ62-2;Q9CZ62;Q8C1I9	Q3U3S0;P58404-2;P58404	Q9WVA2	Q5SW83;P61161;Q8BMA4	Q8CJ40;Q8CJ40-3;Q8CJ40-2	Q5BLK1;P62754;Q8BT09;Q3TL53	Q3TGB1;Q9CQ26;Q5DTH9	Q3TXR9;P20060	Q9DAK9			Q9WV98	Q8BMP6;Q6P9T6;Q3TJW1	B2RXW8;B2RXQ2;B8QI33	Q6QD59;B8JJI4;F7C279							Q3UDM8;Q8VEE0;B2KGF0	Q52KC5;Q9CQP3	Q9ER73;A2A414	Q8C8T8;Z4YL87;H7BWY8							Q8BFQ8	Q9D6F9	Q9CPQ3;Q3UBW3	Q3V0K9					P31230;Q3UZG4;Q8C2U7
	E9Q8A3;Q8BKC8-2;Q8BKC8;Q8BKC8-3	P62862;Q642K5;Q3THB2;Q920W8;Q91V99	Q64521;A2AQR0	Q3V169;A2N6K9;E9Q046;O35706;L7N265;D3Z452;Q62183;E9Q2X0;Q99206;Q8C5S9;Q80YU2;Q80W76;Q62184;O35703;E9PYJ0;B2RUN1;Q8C641	E9Q3I8;E9Q3I9;E9Q3I4;E9Q3I5;E9Q0N0;Q9Z0R4-2;Q9Z0R4;Q3TUF4	P62862;Q642K5;Q3THB2;Q920W8;Q91V99	Q91WD9	Q3TBG7;P21570	Q9CZX8;Q5M9P3;D3YUT3;D3Z722;D3Z5R8;D3YUG3	B1AQF4;Q9D7X3;H3BKL8;Q3V2Y9	D3Z6J0;Q6SKR2;Q6PRU9;Q4KMV5;E9PXT7	D3YXH0;P63054			B2RTM0;P62806	Q8BQV7;Q6ZWX1;O55142;Q9DC85	Q5EBQ6;P51410;Q5M9J5;D3Z629	Q8BH01-3;Q8BH01-2;Q8BH01							Q923G3;P47757-2;A2AMW0;P47757-4;Q3TVK4;Q3TRH8;P47757;F7CAZ6	Q5NCJ9;Q8R1I1	Q3TT94;Q6P1F6;Q571J7;Q3TPC5;Q9CWU3	P41241;Q3UVH2;Q8BIS9							Q8C2D1	Q5NC81;P15532;Q5NC80	Q9D6U8	Q6PHQ8;F7A8R0					F8WIC0;Q9D2H2
	Q6PE01;Q3UFK4	Q9CV53;Q91WK5	Q5M9K1;P07309;Q9D6A4	Q99KI0	Q6A0D1;Q9CRD2	D3Z1N9;F6YH22	Q3TDA1;Q8BX94;Q571D2		Q5EBQ0	Q9Z204-2;Q9Z204-4;Q9Z204-3	Q9EP52	Q8R190;A2A9P6;P24788-2;P24788			A0A087WNP6;Q4VAA2-2;Q4VAA2;A0A087WRM0	P28661-5;P28661-4;P28661-3;P28661-2;P28661;Q5ND18;Q5ND09;P28661-6	Q544I1;Q8VCV2;Q9QYF9;Q8CBD0	P12382;Q8CD98							A2AEX8;A2AEX6;P97447;A2AEX7;A2AEY1;A2AEY2;P97447-2	Q9WV98	P60670;Q3UE06;Q3UDU9;P60670-2	Q8BPF9;Q545V8;O54833;Q8CDH5							Q8VDS4	P60670;Q3UE06;Q3UDU9;P60670-2	Q8C167;Q8BKS6;Q8C167-2;Q8C167-3	P23116;Q6A0B9;Q3UL99;Q3UM46;Q3TKF9;Q3UEK3					Q3TDN2;Q3TDN2-2;D3Z2H4
	Q9CQE1;B1AWZ5	P42208;E9Q3V6;F6WYM0;D3YYB1;D3Z3C0	P17156;B7U582	Q3UUH0;Q91YI0;E0CXM2;E0CY49	D3Z3A0;Q9DCL8;Q8BVM6;Q9CT86	H3BJ30;H3BJW3;Q6NVF9	P98063;Q6P550;Q570Z4		Q544Y7;P18760;F8WGL3;Q9CX22	Q8BQ47;D3Z0T5	P47867	Q91WD9			Q61292;Q3USI2	E9Q8T1;Q2VPC8;Q5DTJ3;Q9ER91	A2AWN8;P59326;Q3TH60	Q3TBF1;Q08642;A3KME9							Q91YR1	Q3V3N6;P61202;P61202-2;A2AQE4;Q3UK65	Q3U781;Q9D6W4;P84104-2;P84104;A2A4X6	Q99KV1							Q3TDE6	Q8BWT1;Q3UKH3	Q9DBF1-2;Q9DBF1;G3UYR8	Q9JLI8					P56375
	Q9EQS3;Q3V1X1;Q8C5M8;A2A7K5	G3X8T9;Q91WP6	Q8VCF9;Q8BN51;Q9R088	Q9JIS5	Q8VE22;F7ARZ1;Q3TI14;Q3THH3;Q99LZ4;Q5SXC9;A7M7Q8	Q3TCW5;Q99J45;D3YUV1	A2AKH7;Q8JZX5;Q9CSK4;Q9D1G5		Q3TCW5;Q99J45;D3YUV1	G5E8P4;G3UWY3;B2RWU4;Q5NBX1-2;Q5NBX1-3;Q5NBX1	P51655	Q64685;Q9JJM6			P97450;E9QAD6	O70194	Q545N7;P30275;A2ARP5	Q62277;A4FUR8							O88845;Q3TR91;O88845-3	O70305-2;E9QM77;O70305;O70305-3;F6U2C2;Q3UX07;F7B6X4;Q3UX51	Q569Z6;Q8BZN7;Q91VL2	Q8VBT0							Q0VF62;B1AR74;Q8CCN5;Q3TAC0;Q8CCN5-2;F7C0F2	Q52L87;P68373;Q3TIZ0	Q8VDM1;F7C2Y9	Q8BU14;Q9CRY0;Q05DA2					Q3UC51;O54734;Q3UG68
	Q3UDM8;Q8VEE0;B2KGF0	Q8CC86	D3YXH0;P63054	Q545Q2;Q64310;Q3U7E6;E0CXD9;F7CH13	Q8VDM6-2;Q8VDM6	Q9D3M4;Q91V77;Q9JL08;P56565	Q8CJ40;Q8CJ40-3;Q8CJ40-2		A0A087WRE5;Q6P3D0	Q8CE50	E9Q2W8;Q9D920	Q3UCY7;Q3TWN7;Q571E2;Q9R1Q9;Q3TT23;Q3THZ3;Q3UWN7;Q3TKX1			Q3UTJ2	Q69ZX3;E9QPE7;Q8R384;O08638;O08638-2	Q5BLJ9;P61358;Q9CSM4;A2A4Q0	Q6PDY2							O35295	P60670;Q3UE06;Q3UDU9;P60670-2	P42208;E9Q3V6;F6WYM0;D3YYB1;D3Z3C0	Q9Z1T1;Q3TQ33;Q3UPG0							Q63810-2;Q63810	Q5FW97;P17182	Q3U781;Q9D6W4;P84104-2;P84104;A2A4X6	Q3UKM9;Q3U3A7;E9Q794;A4FTZ3;Q6ZPV1;Q3UII8;Q924K8-2;Q924K8;Q3TY62;H3BLE1					Q3U2W2;Q7TPV4;Q3TLF6
	P61458	O55234	P24638;Q3UZN1;Q3U4F3	Q8VCF9;Q8BN51;Q9R088	B2CY77;P14206	Q3U7Z6;Q9DBJ1;Q6NWV5	Q3TBG7;P21570		P59266	Q4VA29;Q9CQE8;J3QNB0	D3YXH0;P63054	Q5F1Z8;Q60648			D3Z7X0;D3Z2B3	B2RQC6;E9QAI5;G3UWN2;B2RQC6-2;Q6P9L1;E9QAT6;Q7TN13;Q9CWQ9;F6S3Z3;O88862	Q0VGU0;Q9CQC9;Q3U281	A1A4T2;Q8BHN3-2;Q3UE86;Q8BHN3-3							A3KML3;P68254;F6VW30;P68254-2;F6YY69	P11031	Q3V3N6;P61202;P61202-2;A2AQE4;Q3UK65	B7ZW94;Q8C3F2;Q8C3F2-3;Q3V3X9							Z4YJU8;Q5DTL1;E9PUQ5;Q921M4-2;Q921M4	Q8VDM1;F7C2Y9	Q3UZ63;Q3UL31;Q6NZF1;Q3TIV2	Q62084					Q9EPC1;Q3UF75;Q8C5R4
	Q8QZV7;F6W761	Q544Z3;Q99020;Q9D6G1;Q80XR6;Q3TMZ8;Q20BD0	D3Z5I1;Q3UPF5-2;Q3UPF5;G3X9X5;Q8K302	Q71FD5	Q542X7;P80314;Q9JJD8	B2RRH9;Q3THK7			Q3U4U6;P80318;E9Q133;Q3U0I3;F6Q609	Q9R0P3;H3BLJ9;H3BJL6;H3BKH6;H3BJP2;H3BK43	Q8R190;A2A9P6;P24788-2;P24788	Q8C0W0			A6H663;Q9JLV1;Q3TAM9	Q91VE6-2;Q91VE6;Q8BMY3;E0CXU3	Z4YJY0;Q3TCJ1;D3Z4D8	Q3UDR8							F8WHT3;Q7TPM1;F7AYW2;A2AN33	Q921W2;Q545C1;P70318;D6RGU1	Q6ZWZ2	Q05D44							Q3UGK7;Q3UQ99;Q7TPN5;Q3TXX8;Q91YD9	Q3ULB1;Q921W7;P47226-2;P47226	Q8BQ47;D3Z0T5	A7TU71;A2ALU4					Q6DFW4
	Q8C2T9;Q9Z1M8;Q3TJY5;Q8CDT0;Q8C7D0	P61458	Q6P6M7;Q3U597	Q8R3I2-2;Q8R3I2;Q8R3I2-3	P62274	Q8R0M2;Q3U548;Q91ZJ5-2;Q91ZJ5			P62342	Q4FK11;Q3UM20;Q3TF40;Q99K48;Q3TTV7;Q3TFC2	P24638;Q3UZN1;Q3U4F3	P97401			Q91ZZ3	G5E850;Q544Z9;P56395;E0CY88	Q99LB4;Q3UJ44;D3YTL5;Q3TNN6;P24452;D3YZN3;D3YU77	Q91Z92							D3Z6P0-2;D3Z6P0	P42208;E9Q3V6;F6WYM0;D3YYB1;D3Z3C0	Q9CQ19	A1A4T2;Q8BHN3-2;Q3UE86;Q8BHN3-3							Q9R1K9;Z4YJH1;B1AUQ7	Q9CPQ3;Q3UBW3	Q52L87;P68373;Q3TIZ0	Q8K2T8					Q6RUT9;O70496;Q8CCI9;E9PYL4
	D3Z687;Q9DCT6-2;Q9DCT6;F8WH46;F6XN97;A2CF80;A2CF83;Q9DCT6-4;Q9DCT6-3	Q99JR8-2;Q99JR8;Q3TXH6;Q3TM59	Q0PD14;Q8BHC1	P24638;Q3UZN1;Q3U4F3	Q2UZW7;Q6PER3	Q3U7P4;Q3TM10;Q6PGH2;Q3TJZ7			Q9CQM8;O09167;Q4VA28	Q58E59;Q9D554	Q64685;Q9JJM6	Q3TXV7;Q3TW10;P29416;Q3THQ0;Q8BNS6;Q3UCP6;Q3U936;Q3TVI2;Q3TKF6			Q99JP4	Q9JM76;H7BWZ3;D3Z2F7;D3Z2F8	H3BKT0;H3BJN3;Q6AXG1;Q9JJB6;H3BJ26;H3BLJ7	Q921L5;Q8C205							Q3V1M8;Q3U4Z7;Q8VDJ3;A0A087WP83	Q3U781;Q9D6W4;P84104-2;P84104;A2A4X6	Q8BJF9	Q3UI56;P14824;Q3UDK4							Q3TWG5;Q8R1Q8	Q3UCC5;Q6P8I4;F8WI88;Q3TM89;Q3KQH9;D3YWA4	Q3ULB1;Q921W7;P47226-2;P47226	Q790I0;Q9Z1Q9;Q7TPT7;Q3U3D3;G3UY93;Q3TII4					A2AWN8;P59326;Q3TH60
	Q3UQN2;F6RG68;J3QPQ1;Q3UQN2-3;Q3UQN2-2	Q63844;D3Z3G6;Q3U2H3;D3Z6D8	Q545Q2;Q64310;Q3U7E6;E0CXD9;F7CH13	Q6PAC1;P13020-2;Q3UCW8;P13020;Q3U9Q8;Q3TGJ9	Q3UII2;P40237;A2AIJ1	Q9D2D1;Q544R6;G3X8T3;P16675			Q6F4J1;P83887;Q6F4J0;Q8VCK3	Q9CWU9	Q3TMB8;P54822;E9Q242;E9Q3T7	Q571E4;Q8CC47			Q80XC2	Q7TT04;Q3UJY4;P59235;Q3URN3	Q8VDS4	Q58E35;P47955							Q8BGR9	Q3TT94;Q6P1F6;Q571J7;Q3TPC5;Q9CWU3	Q8BQV7;Q6ZWX1;O55142;Q9DC85	Q8VDQ8;Q8VDQ8-2;Q3UJK6;Q8VDQ8-3;Q8VDQ8-4							A6H663;Q9JLV1;Q3TAM9	Q9D6U8	O88952;Q3TTY6;Q3TS99	Q8C4Y3;Q69ZP4					Q3UXD9;Q99MZ7
	A0A087WRY3;Q80XU3	P99026	P68404-2;P68404	A2VCS7;E9PWM3	Q8BTS0;Q61656;Q5U222;Q3V0Z8;A1L333;Q3UXW3;S4R1I6	G3X8T9;Q91WP6			Q3UMF0-3;B1AZ15;B1AZ14;Q3UMF0-4;Q3UMF0-2;Q3UMF0	O35405	Q8C0W0	Q3TMB8;P54822;E9Q242;E9Q3T7			Q99LX0;A2A813;A2A815	Q99JZ4;Q3TXJ4;P36536	Q3UQB4;A2BFB1;Q8K0H8;A2BFB0;O08609-3;O08609;A2BFB2;O08609-2	A2ADR8;Q8R3G1							Q3U8E7;P18155	Q9CQ19	Q8CHP5;Q8CHP5-2	Q80VC8;E9PUZ5;Q62083							Q8BV13;Q3TDL0	O88952;Q3TTY6;Q3TS99	Q8BWT1;Q3UKH3	O35566					Q9QXT0
	P70158	Q4VA29;Q9CQE8;J3QNB0	Q6PAC1;P13020-2;Q3UCW8;P13020;Q3U9Q8;Q3TGJ9	Q0PD14;Q8BHC1	Q8C052;B2RWW1	Q8K0U4;Q3TNR3			A1L0U3;B9EI85;P84228;A1L0V4;P68433;F8WI35	Q6PDI4;Q3USH5	Q571E4;Q8CC47	Q545J3;Q9R098			Q8CE80;P51125-3;P51125-2;P51125-6;P51125;Q921U7;Q8C281;P51125-7;Q8CE04;Q8CB83	Q5EBQ6;P51410;Q5M9J5;D3Z629;D3YZT0;S4R1R7	Q3U311;Q03157;Q3TCA7;Q3TUB1	Q543B9;Q9QUR6;Q3TCS0;Q8C6A3;Q3TQ97							Q91WM1-2;Q91WM1;Q8C5B7	A3KML3;P68254;F6VW30;P68254-2;F6YY69	D3Z589;D3YU22;D3YU59;Q3UH68-3;Q3UH68;Q8CGB7;Q3UH68-2	Q8VBZ3							Q8BGR9	Q8BH44;G3UW48	Q3V3N6;P61202;P61202-2;A2AQE4;Q3UK65	Q9CQ88					Q3TRK3;Q9QXS6-3;Q9QXS6;Q9QXS6-2
	Q8BIW1	Q9CQ49;D3Z3D2	Q71FD5	Q6P6M7;Q3U597	Q8C4B4;Q8C4B4-2	Q922D8;Q3TW74;Q3UZH3;Q8BXX7			Q9DBP5	Q91VH6;Q3TWT2	Q3TXV7;Q3TW10;P29416;Q3THQ0;Q8BNS6;Q3UCP6;Q3U936;Q3TVI2;Q3TKF6	P24638;Q3UZN1;Q3U4F3			B2RXY7;P48758	D3Z1F6;B9EK90;Q8VDU5;D3YXV4	P70158	Q543F1;Q3U5Q3;A2AH85;Q6A0E3;O08810;G3UZ34;Q3TMY8;Q7TMX4							Q60960	D3Z4U0;B2RRT9;D3Z4T9;Q9R020;E9PUD0	Q9JJV2-3;Q9JJV2;D3YWS3;Q9JJV2-2	Q58E35;P47955							Q9D2U9;Q8CGP0	Q3UK33;O08908;F7CB91	D3Z589;D3YU22;D3YU59;Q3UH68-3;Q3UH68;Q8CGB7;Q3UH68-2	P17426-2;P17426					O55042-2;O55042
	Q545V3;Q3UJ20;P17183;D3Z6E4;Q922A0	Q6P5B5;Q9WVR4	Q8R3I2-2;Q8R3I2;Q8R3I2-3	P70227	E9QP00;Q3TAP5;Q6PFR5	Q9JJV2-3;Q9JJV2;D3YWS3;Q9JJV2-2			Q04447	D3Z596;D3YWU5;D3Z595	Q5F1Z8;Q60648	Q8R395			Q5BLK0;P35979;Q8C2K0;Q3TIQ2	P97450;E9QAD6;Q812D0	Q8WTY4;E0CYY1	E9PVP3;Q5F2B1;Q8C9V6;Q8R0J2;F6XX36;Q9R0Q9							Q8BKZ9	Q569Z6;Q8BZN7;Q91VL2	Q8K411-2;Q8K411;Q8K411-3	Q91XF0							P08030	Q9DBF1-2;Q9DBF1;G3UYR8	Q8BK67	Q4KML7;Q3UL48;P26040;Q3UXR4;Q3TCP5;Q8CBU4					Q69ZP5;Q4FK22;Q9DC16
	Q9D486-3;Q9D486;B2RY70;Q9D486-2	Q91VZ6;D3YVX4	Q8BHN0;Q8BHN0-2	P68404-2;P68404	Q14AQ1;P62334;Q8QZS9	Q3UNN4;Q3UPK0;Q3UMX0;P97496-2;P97496;D3Z1X8			Q9DCD8;Q58EV4;O70435;Q3TEL1;E0CX62	Q14C24;Q9D883;G3UW94	P97401	Q5SUC8;P52624;E9Q5K7			F6ZFU0	E9PVD1	Q69ZX3;E9QPE7;Q8R384;O08638;O08638-2	Q6P5E4							A2AD03;Q3UR39;Q9QXG2;Q8CBI2	Q8CHP5;Q8CHP5-2	Q8C1L7;Q9CQR2	P51863;Q921S5							Q3SXD3	Q8C167;Q8BKS6;Q8C167-2;Q8C167-3	A2AEB4;A2AEB3;Q3TME1;Q3TXN7;Q9R0Q4;A2AEB5;Q3U6G8	A1BN54;Q7TPR4					Q9CYA0
	Q9EQ20;Q8K0L1	A1L367;A1L366;Q61550;Q3UTE4;Q3TG35;Q6ZQJ6	Q99M47;Q3TPJ9;O08738;Q9D089	Q8BHN0;Q8BHN0-2	P57774	Q9QZX7-2;Q9QZX7			N0E4C0;P67871;N0E4C5;G3UXG7;G3UZJ5;N0E463;G3UXU2	Q3TDD8;Q3TSY9;Q8BGD9;Q3UGC0;Q3THB0;Q922K6;B2RWE8	Q3UCY7;Q3TWN7;Q571E2;Q9R1Q9;Q3TT23;Q3THZ3;Q3UWN7;Q3TKX1	Q8R121;Q8R121-2			Q7TMN7	O70305-2;E9QM77;O70305;O70305-3;F6U2C2;Q3UX07;F7B6X4;Q3UX51;F6V8M6	Q60803;Q3UHM2;Q3UHJ1	Q80UE3;B6ZHD0;O70318;Q3UNQ6;Q811B2;Q8CGJ6;B6ZHC6;Q8C928							Q3UZZ6;Q8BT67	Q8BQV7;Q6ZWX1;O55142;Q9DC85	Q9Z0Y1;E9Q919	Q64735-2;Q64735;Q62479							Q5M9P7;Q9CR86;Q3UD53;Q3U434	Q3V3N6;P61202;P61202-2;A2AQE4;Q3UK65	Q8BV13;Q3TDL0	Q9D1M0					Q60951;Q3UBT1;P62960;Q71V06;Q810K5;Q60950
	Q544Z3;Q99020;Q9D6G1;Q80XR6;Q3TMZ8;Q20BD0	Q3U313;Q8VH51-2;Q8VH51;E9Q8F0;Q0VGU9;Q8VH51-3;B7ZD61	Q8VCT0;Q3U8R7;P35951;Q3TVR4;Q3TDD1;Q91ZJ1	Q5M9K1;P07309;Q9D6A4	Q6NXZ0;Q3UDD5	Q64374			Q9Z2X1;Q9Z2X1-2;J3QM80;J3QMT0	P42128	Q545J3;Q9R098	Q9ER58;F6SLR4;Q80U51;Q6PAN0			Q3UJR8;Q64152-2;Q64152	Q8BNU0;Q8BNU0-2;D3Z3J0	D3Z7V3;H7BX64;Q3URD3-2;Q3URD3;F8WIH0;F6UV57;F6YCM8;Q3URD3-5	Q91VE6-2;Q91VE6							Q8BFQ8	Q8K411-2;Q8K411;Q8K411-3	Q921W2;Q545C1;P70318;D6RGU1	E9PZ87;Q8BJG6							Q3TU85;Q61696;Q3TAI8	Q9DBP5	Q9DBP5	Q8VEH8;Q9CWA6					Q4PJX1;Q4PJX1-3;Q4PJX1-2
	Q3TKM5;Q3TGZ3;P70404;Q684I8	Q5M8N4-2;Q5M8N4	Q6PDI6;Q6PDI6-3	Q3TJQ2;Q3U866;Q3U399;Q91ZN5-2;Q91ZN5	A0A087WRY3;Q80XU3	A2ACL9;Q62443;Q3UST4			P68040	Q3TH57;Q8CGF7-2;Q8CGF7;Q8CGF7-3	A2VCS7;E9PWM3	Q14BZ3;P70202			Q3UIG8;Q9JIF0-2;Q8C2D7;Q3TPF5;Q80WB1;Q80WV6;Q9JIF0-3;Q9JIF0;D3Z0A2;F8WH01;D3Z3N0;Q9CX58	Q9CRA5;Q3UWP6;Q3TIL4;Q05BZ0;Q9CRA5-2	G5E850;Q544Z9;P56395	P63085;Q3UF82;O35558							Q9Z2X1;Q9Z2X1-2;J3QM80;J3QMT0	Q8C1L7;Q9CQR2	Q8C167;Q8BKS6;Q8C167-2;Q8C167-3	Q9EQQ9-3;Q9EQQ9							Q3UJR8;Q64152-2;Q64152	Q8BK67	Q3TLE4;Q8BQ46;F6QCI0	Q04750					Q9D958
	Q8CC86	A2AWT5;P25976;A2AWT6;P25976-2;Q05DS1	Q3TJQ2;Q3U866;Q3U399;Q91ZN5-2;Q91ZN5	Q3TCD4;Q9WUR2-2;Q9WUR2;E9PYC6;E9Q858;E9PUY9;E9PYA9;E9PVM6;E9Q7A8	O54988	O35654;A8Y5G7			Q9ERD7;Q9CRT0	Q5FWB7;P05064;A6ZI44;Q6NY00;D3YWI1;Q9CPQ9	Q3TDA1;Q8BX94;Q571D2	A3KN68			Q5EBQ0	Q3U311;Q03157;Q3TCA7;Q3TUB1	Q9D0J4	Q80X90							O08749;Q3TIE8	Q9ESU1;Q6ZWP4;Q9Z0H3;Q9ESU0;Q3UDA4;Q9Z0H3-2;Q9JJD1	P21619	Q3UZP4							Q541E2;Q3TWM2;P51855;Q8R436	Q8BV13;Q3TDL0	P36552;Q3U029	P55937-1;P55937					Q9ESP1
	Q5FWJ9;Q3UDG5;Q3U2X1;Q3TFE2;Q63850;Q3UGJ7;Q3THR9	Q8CIN6;Q8CIN6-2	Q548L0;Q3UJ69;Q61624;Q91XQ8;Q8CB43	Q8VCT0;Q3U8R7;P35951;Q3TVR4;Q3TDD1;Q91ZJ1	Q5EBG8	Q8VC30;Q3UTZ4			D3Z600;O09012-2;O09012	P12968	Q5SUC8;P52624;E9Q5K7	Q3TDA1;Q8BX94;Q571D2			E9PW20;Q9CY57-3;Q9CY57;B7ZMS6;Q2VPR3;Q9CY57-5;Q9CY57-4;Q9CY57-2;D3YZA1;D3Z7T7	Q4FK54;P61290;A2A4J1;Q99K09;A2A4J3	Q9R0H0-2;Q9R0H0;A2A848;Q8C168;Q8BW35	P63168;Q9D6F6							O88952;Q3TTY6;Q3TS99	Q8BJF9	Q9ERT9	Q9JLI8							Q9CR70;J3JS94	P36552;Q3U029	Q3UK33;O08908;F7CB91	Q3UPL0;Q3UPL0-2					B7ZMR0;Q76LS9-2;Q76LS9
	A2AWT5;P25976;A2AWT6;P25976-2;Q05DS1	A2A8L5;F6Y3V0;F6S1X8	P70227	Q3UKP5;Q9DCD2	Q9EQ20;Q8K0L1	Q8R4X3;Q6ZQ53;F6YJB6;V9GXJ1			Q3UBP6;Q3UBQ4	B7ZP16;H7BWY3;Q3UEG6	D3YX15;Q61153;D6RDQ6	A2VCS7;E9PWM3			Q3TS44;Q9R1P4	Q3UM23;Q91VI7	Q8BJW6;Q8BJW6-2	Q5RJV4;Q7TNU0;Q66JR7;Q9D0F9;Q3U6X6							Q9CQY2;D3YZS0	P21619	A3KML3;P68254;F6VW30;P68254-2;F6YY69	Q6GQU1;Q3UPC4;Q3TJE3;P17710-3;Q3UE51;G3UVV4;P17710-4;P17710;P17710-2;Q3TTB4							Q505L1;Q3TF62;Q9Z2N8	Q8K2C6;Q5M8R0	Q9CQU1	G5E866;Q99NB9;Q3US00;A0JLN0;Q3UIB4					Q80W65
	A0JNY3;Q8BUV3	Q545V3;Q3UJ20;P17183;D3Z6E4;Q922A0	Q8BND5-2;Q8BND5;Q8BND5-3	Q9WTZ1;D3Z497	Q8QZZ7;G3X9K8	Q3U9R7;Q3UB84;P47791-2;P47791;Q3UAS7;Q3TXK9;Q3TWI5;Q91Z57			O54941	Q8R4X3;Q6ZQ53;F6YJB6;V9GXJ1	Q8R395	D3YX15;Q61153;D6RDQ6			Q543H0;Q64674;Q8BSZ8;Q3UJL7	P52875	Q5M9N5;Q5M9J8;P41105	Q8BNI4;Q3U957;Q8BNI4-2							Q3ULL5;Q99L45	Q8C167;Q8BKS6;Q8C167-2;Q8C167-3	P11031	B1AZ42;B1AZ39;P0C0A3;B1AZ41;Q3TS10							Q78XF5	A2AEB4;A2AEB3;Q3TME1;Q3TXN7;Q9R0Q4;A2AEB5;Q3U6G8	Q8BH44;G3UW48	Q3UNN2;Q3U8S1;Q3U468;A2APM5;A2APM3;A2APM4;E9QKM8;Q80X37;A2APM1;A2APM2;P15379-2;P15379-3;P15379-6;P15379-11;P15379-5;P15379-10;P15379-9;P15379-4;P15379-8;P15379-7;P15379					Q6PGC1
	Q8BTW2;Q3U8X1;Q9DCH4;Q6IRT4;Q3UVY8	Q9CQE1;B1AWZ5	Q544T7;P45700	Q99M47;Q3TPJ9;O08738;Q9D089	Q8VCN5	Q78ZM0;O70492;D3Z789;Q9CU14;Q9CSC2;D3Z6Z0			Q8VDQ1;Q3TXN1;Q8VDQ1-2	Q91YL8;Q5BLJ4;Q3UAE6;Q3TIJ4;Q9D7H3;D6REI7;D6RD00	Q9ER58;F6SLR4;Q80U51;Q6PAN0	Q5M9K1;P07309;Q9D6A4			Q8QZV7;F6W761	A2A7Z4;Q78IG7;Q9CQH7	E9Q8T1	Q3UEB3-2;Q3UEB3-3;Q3UEB3							Q8BUY5	Q9JJV2-3;Q9JJV2;D3YWS3;Q9JJV2-2	Q9ESU1;Q6ZWP4;Q9Z0H3;Q9ESU0;Q3UDA4;Q9Z0H3-2;Q9JJD1	Q9EPJ9;Q3TGS9;Q05DE0;V9GXM1;Q9EPJ9-2;V9GWV1;Q6PB94;Q05BC5							G5E924;Q3UMT7	P97450;E9QAD6	Q8K2C6;Q5M8R0	Q3UGB8;Q99J56					Q3UE92;Q3UKF5;S4R1I3;Q6P1B1;Q3TL27;Q8VDK8;Q8BKH1
	G3X8T9;Q91WP6	Q6PE01;Q3UFK4	Q9WTZ1;D3Z497	Q64685;Q9JJM6	B7ZCU2;B7ZCU5;Q3TPY5;Q3TMI0;Q6AXD3;B7ZCU4;B7ZCU3;Q3TJR5;Q3TJ64;B7ZCU0;J3QNK8;Q8CBW3-5;Q8CBW3-2;Q8CBW3-4;Q8CBW3-3;Q8CBW3;Q3UAH6	P68369			Q3U8F7;Q3U3C2;Q9Z0J0;Q3TXQ4	Q3TA40;Q8R0A7;Q8BQB5	Q8R121;Q8R121-2	Q3TBG7;P21570			Q8BMJ3	H3BKT0;H3BJN3;Q6AXG1;Q9JJB6;H3BJ26;H3BLJ7;P70381;Q9CVV0	Q8R2Y2;Q8R2Y2-2	Q9EQH2;Q8C9W5;Q8C4S7							D3Z767;Q9D6K7;D3Z1T8;Q9D6K7-2	Q9ERT9	D3Z4U0;B2RRT9;D3Z4T9;Q9R020;E9PUD0	Q9JK23;D3Z795							Q3TDV0;P62700;Q65Z92;Q3TMG7	Q03265;D3Z6F5	Q8BH43;Q3T9Z7;Q80UQ8	B2RTG7;E0CYH4;Q8C6G8;F7DFQ2					Q3TM85;Q3U3W2;B2RVR2;Q80TD8
	O55234	A2AWN8;P59326;Q3TH60	Q3TCD4;Q9WUR2-2;Q9WUR2;E9PYC6;E9Q858;E9PUY9;E9PYA9;E9PVM6;E9Q7A8	Q548L0;Q3UJ69;Q61624;Q91XQ8;Q8CB43	Q3UN47;O08600	P83917;Q7TPM0;Q9CYJ8			P27773	Q9WV02;A2AFI3;Q9WV02-2;S4R1F6	A3KN68	A2AKH7;Q8JZX5;Q9CSK4;Q9D1G5			Q3U7P4;Q3TM10;Q6PGH2;Q3TJZ7	Q60803;Q3UHM2;Q3UHJ1;D3Z343	P52875	Q6ZQ84;Q9JLV5;E9Q4T8							P62627;A2AVR9	Q8R2Y2;Q8R2Y2-2	Q5NCJ9;Q8R1I1	O89079;D3Z315;F6YFR7							Q8R2K1;D3YWS7;F6SJM7;Q8R2K1-2;Q8R2K1-3;Q8R2K1-5;Q8R2K1-4;F6X9P4	Q3TPU5;O70378;Q8C988;Q3TTC9;M0QWY0;M0QWP2	Q3TPU5;O70378;Q8C988;Q3TTC9;M0QWY0;M0QWP2	Q0VGB7;A4QMV1					Q3TW51;Q78PY7;Q3UZI3;Q3TRW3
	Q8BUM1;Q544R5;Q921F2;A0A087WRZ5;Q8R0B4;C9DT14;Q8BLD4;Q6VYI5;Q6VYI4;Q05C33;A0A087WR97;D2KPZ5;A0A087WSE4;A0A087WQA5	Q9JLB9;Q9JLB9-3;Q9JLB9-2	Q3UKP5;Q9DCD2	Q544T7;P45700	Q4FK11;Q3UM20;Q3TF40;Q99K48;Q3TTV7;Q3TFC2	Q91ZZ3			D3YZ20;Q6PI63;O08740;Q3TYI2	G3XA13;Q99NH2;B2RUK1;B7ZNY3;F6S7Z1;A5D6P2;Q99NH2-2;E0CXR8;E0CZE2;E0CZ83;E0CXL4;Q99NH2-4;Q8BPQ6;Q8BPQ4;E9PYJ2;F6TSJ9;Q99NH2-3;E0CX45;E0CY24;Q99NH2-5;F6UGU7	A2AKH7;Q8JZX5;Q9CSK4;Q9D1G5				Q545G0;Q9R1P1	A2ALR9;Q3V0C5;Q3V0C5-5;Q3V0C5-2;A2ALR8;Q3V0C5-4;Q3V0C5-3;B7ZNK5;A2ALR5	Q80TZ3;Q80TZ3-2;Q80TZ3-3	Q8BYK6-3;Q8BYK6;Q7TN20;Q8BYK6-2;Q8BVC6							Q9R1K9;Z4YJH1;B1AUQ7	Q9Z0Y1;E9Q919	E0CXZ1;J3QM95;F8WGT4;Q8BYN5-2;Q8BYN5	Q3UZR8;Q99LC8							Q99JB2;A2AG39;F6WI02	Q9CQU1	Q3TT94;Q6P1F6;Q571J7;Q3TPC5;Q9CWU3	Q3TJZ6;Q8BL36					E9Q411;Q6GQV6;Q80XK8;Q6PGH6
	P42208;E9Q3V6;F6WYM0;D3YYB1;D3Z3C0	E9QN52;Q91WK0-2;Q91WK0	Q64685;Q9JJM6	Q6PDI6;Q6PDI6-3	Q545K5;O89086;Q8BG13	Q3U0F3;Q91VK4;A0A087WRM2			Q8VDM6-2;Q8VDM6	A2AD84;A2AD85;Q99JT2	Q3TBG7;P21570				B1B1D8;Q9D773;B1B1D7	Q9DAI2;Q3TV16	Q8VDN4;D3YUR9	Q9QXK3-4;Q9QXK3;Q9QXK3-3							Q9D2R6;E9Q6W2	Q8BH44;G3UW48	Q1HL32;Q9CW03;Q6P5E5;Q6PIE1;Q6PFZ4;Q3UNU2	E9PVD1							O88428;Q9QYS0	P56480	Q3UC02;Q9DB79;P62281;Q9D0P6	Q8BJW6;Q8BJW6-2					Q3U344;P84078;P61205
	Q6P5B5;Q9WVR4	A2AER7;Q91VJ5;A2AER8	Q102J0;Q8R242;Q8R242-2	B2RUS7;Q8BNE2;Q6PGE2;Q9Z2P1	O88712-2;O88712;O88712-3	Q9ERB0			Q5EBP9;Q62318;Q3UDN8;Q62318-2	E9PV44;O35143	Q14BZ3;P70202				P62830	Q5D098;P70195	Q6ZWZ6;P63323	Q9ERI6;Q569U9;Q3UQM5							Q8C298;E9Q179;Q8C5Q4	Q6P1B6;Q6NZN9;Q8BH69	Q542X7;P80314;Q9JJD8	B2RWW6;Q3UHQ5;E9PVA8;Q8CHH7;Q6PGM5							Q80XD3;O54829;Q45FE4;Q45FE5;Q45FE1;Q45FE2;Q45FE3;A0A087WSH2;A0A087WQG6;A0A087WSJ9;A0A087WPW1;F6WDS8;A0A087WNZ9;A0A087WRP8;A0A087WPC4;A0A087WPD1;A0A087WRN0;Q9Z2H2	Q52KC5;Q9CQP3	Q03265;D3Z6F5	Q91XF0					Q542H2;Q9Z2U0;Q3UIT9;Q3TN31;Q3THL2
	Q80T06;Q91VK2;P57776;E9QN08;D3YY68;D3YUQ9;D3YZT9	Q9D6L8;Q9D6L8-2	Q8VH34;Q3TX84;Q3TA96;Q9DC13;P11438;Q922T9	Q9Z2C9;G3V027;I6L9A6;G3UYB7;G3UYZ2	G3UXL2;Q9D7G0;Q3TI27;Q3UPD5;Q3UYQ0	Q9JLI6;Q9JLI6-2			Q3UN47;O08600	Q9JHI7;B2RY30;D6RGB5	Q5M9K1;P07309;Q9D6A4				Q9QYA2;Q3UQD0	Q3UQB4;A2BFB1;Q8K0H8;A2BFB0;O08609-3;O08609;A2BFB2;O08609-2	Q3TLE4;Q8BQ46;F6QCI0	Q8BNZ1;O35623							Q3UIA1;P19426-2;P19426;G3UY39	Q542X7;P80314;Q9JJD8	Q8BH44;G3UW48	E9Q3Q6;Q54AJ5;Q61490;E9Q4G8							Q3UJB0;Q3UAI4;Q80W39;Q3UBH2;Q3UQU5;Q8BL33	P11031	Q52KC5;Q9CQP3	Q58E70;P21107-2;D3Z2H9					Q545N8;Q9Z2M7;Q9D1M5;Q9DCE3;Q9CZE9
	Q3U313;Q8VH51-2;Q8VH51;E9Q8F0;Q0VGU9;Q8VH51-3;B7ZD61	Q8BUM1;Q544R5;Q921F2;A0A087WRZ5;Q8R0B4;C9DT14;Q8BLD4;Q6VYI5;Q6VYI4;Q05C33;A0A087WR97;D2KPZ5;A0A087WSE4;A0A087WQA5	Q9Z2C9;G3V027;I6L9A6;G3UYB7;G3UYZ2	Q102J0;Q8R242;Q8R242-2	Q3UJB0;Q3UAI4;Q80W39;Q3UBH2;Q3UQU5;Q8BL33	Q3ULH5;Q3TXW2;Q3TVV6;Q8VEK3;O88568;G3XA10;Q3TWN5;Q3TGN5;Q3TS50			Q99KQ9;Q9ES93;Q9R013;A4FUP7	O35954					Q6NXZ0;Q3UDD5	Q0VDL6;Q04899;Q0VDL5	Q8BJA6;Q3UY68;Q91YS8;Q3TDH8	Q9EPN1-3;Q9EPN1-4;Q9EPN1							Q3ULB1;Q921W7;P47226-2;P47226	Q91YR1	S4R2J9;Q3TLH4-5;Q3TLH4;S4R294	Q4FK79;Q9DCF9-2;Q9DCF9;Q3TS69							Q8K209	Q9DCM0	P97450;E9QAD6	Q8VE47;F6VRI6					Q80ZP8;Q3TMX5;A8C1V1;Q9CXI5;F6USD5;F6T4L3;E0CXA8
	Q9JIQ3;Q7TPS3;Q8R1D8;D3Z3K5;D3Z2Q3	F7BJK1;Q2TJI9	D3YX15;Q61153;D6RDQ6	Q8BND5-2;Q8BND5;Q8BND5-3	K3W4Q9;Q8BH60-2;Q8BH60	Q9CWW6			Q8BN32;P29341;Q3U8U8;Q99KL3	F6Y616;Q8VE62;D3Z3J6;G3UYE5					Q9Z2E1	Q61292;Q3USI2	A8CVP4;A8CVP1;Q4ZJB3;E9QP62;Q99JW4;Q9D7B2	Q3UP03;E9Q9C7;E9Q9C0;E9Q9C1;Q8K4G5-2;E9Q9C2;E9QK41;Q8K4G5;E9Q9D1;E9Q9D2;E9Q030;E9Q9C4;Q8K4G5-3;Q8K4G5-4;E9Q9Q7;B9EIV0;Q8K278							Q8BH44;G3UW48	Q3U6D7;O55100-2;O55100	Q91YR1	Q99PV0							P61022;B0R091	Q3TT94;Q6P1F6;Q571J7;Q3TPC5;Q9CWU3	Q64374	Q8WTY4;E0CYY1					Q8R2K1;D3YWS7;F6SJM7;Q8R2K1-2;Q8R2K1-3;Q8R2K1-5;Q8R2K1-4;F6X9P4
	Q2UZW7;Q6PER3	Q5EBJ0;P11404	B2RUS7;Q8BNE2;Q6PGE2;Q9Z2P1	Q8R0F3;E9Q265;E9Q0Z7	P62996;F8WJG3;Q5PR75	Q99LC2			Q3UKV4;D3Z5N6;Q61103;F8WIP7	Q64374					Q9R1K9;Z4YJH1;B1AUQ7	Q8C1B7-3;Q8C1B7-2;Q8C1B7	Q3TIU4	Q3TPJ8;A2BFF7;A2BFF9;D6Q0F6;D6Q0F5;O88487;A2BFF8;D6Q0F7;A2BFF5;Q3UDA2							Q9ESU1;Q6ZWP4;Q9Z0H3;Q9ESU0;Q3UDA4;Q9Z0H3-2;Q9JJD1	Q8BFZ3	Q6P1B6;Q6NZN9;Q8BH69	Q5NCK8;Q9WTU6-3;Q9WTU6-4;Q9WTU6-2;Q9WTU6;Q8C094							Q8K2C6;Q5M8R0	D3Z4U0;B2RRT9;D3Z4T9;Q9R020;E9PUD0	D3Z3A0;Q9DCL8;Q8BVM6;Q9CT86	Q9JMA1;E9PYI8;Q80UN0;Q3TC32					Q9Z2Q6;B7ZNM7;Q52KH2
	Q4VA29;Q9CQE8;J3QNB0	Q8BIW1	Q8R0F3;E9Q265;E9Q0Z7	Q8VH34;Q3TX84;Q3TA96;Q9DC13;P11438;Q922T9	Q99LB4;Q3UJ44;D3YTL5;Q3TNN6;P24452;D3YZN3;D3YU77	Q545V3;Q3UJ20;P17183;D3Z6E4;Q922A0			P43274	Q9CQM8;O09167;Q4VA28					B2RRS4;E9PWV7;Q923K4;D6RDC6;Q923K4-2	B1AUN2;B1AUN3;Q3UKV0;A4FUS0;A0AUM9;Q3T9T4	Q3TND1;P45878;Q3UND3	E9Q5B6							Q8CIN4	Q1HL32;Q9CW03;Q6P5E5;Q6PIE1;Q6PFZ4;Q3UNU2	Q8R2Y2;Q8R2Y2-2	Q0VDL6;Q04899;Q0VDL5							Q91W39;Q8BX12;B7ZC24	Q64374	P56480	Q3UXM3;Q9QYH6;Q3UIL5;Q91W72;Q571N9					Q3TB96;Q3T9V8
	Q9CQ49;D3Z3D2	A0A087WRY3;Q80XU3	P47867	D3YX15;Q61153;D6RDQ6	P42669;Q8C6E9	P61082;F7CDT0;F6WMC0			Q7TND9;P53395	Q8BTS0;Q61656;Q5U222;Q3V0Z8;A1L333;Q3UXW3;S4R1I6					Q7TSE6;Q7TSE6-2	Q3TWE3;Q3THC3;Q3TF72;P09103;Q3URP6;Q3UBY9;Q3UJA8;Q3UA23;Q3TIM0;Q3TGS0;Q3UDR2;Q3U738;Q3TT76;E9Q8G8;Q3TIQ5	E9PZF0;Q5NC82;Q01768;B0LAA8;Q8R4B4	Q91YT7;Q3UNH5							Q3U781;Q9D6W4;P84104-2;P84104;A2A4X6	P47963;Q5RKP3	Q8BFZ3	Q3U8P8;Q3URU8;B1ASP2;P52332;Q8K0I7							Q03517	Q3UC02;Q9DB79;P62281;Q9D0P6	Q3TQR3;P59325;Q3TKY2;Q8BVV6;Q05CM5;Q05CH7;Q3TT65;Q6PHA6;Q05C65	E9QAQ7;A2BH40-3;A2BH40;A2BH40-4;A2BH40-2					Q9Z2D6-2;Q9Z2D6
	P99026	Q99LB4;Q3UJ44;D3YTL5;Q3TNN6;P24452;D3YZN3;D3YU77	Q8K354	Q8K354	G5E8P4;G3UWY3;B2RWU4;Q5NBX1-2;Q5NBX1-3;Q5NBX1	Q9DCJ1			Q78HU3	Q8C052;B2RWW1					E9QB01;P13595-2;E9Q589;P13595-3;P13595-4	Z4YJY0;Q3TCJ1;D3Z4D8;Q6A0B5;D6RJ39	P28651	Q6ZQ38;Q3UMI9							Q9JKV1;Q8VCI8;D3YUD8	Q5EAT0;P49962;Q3UIK3;D3YZX8	Q61935;A0A087WRZ7;Q545G5;E9PWG4;Q6PCW9;Q545T7;P05977-2;P05977;P09542	Q7TSV4							Q8R1S0;D3YW66	Q3TQR3;P59325;Q3TKY2;Q8BVV6;Q05CM5;Q05CH7;Q3TT65;Q6PHA6;Q05C65	Q3SXD3	P05132;P05132-2					Q8BJW6;Q8BJW6-2
	A2AWN8;P59326;Q3TH60	Q9EQ20;Q8K0L1	P97807-2;P97807	P47867	Q6P3A8;Q6P3A8-2	Q3TPU5;O70378;Q8C988;Q3TTC9;M0QWY0;M0QWP2			Q9Z204-2;Q9Z204-4;Q9Z204-3	Q9D3M4;Q91V77;Q9JL08;P56565					P34022;H7BX22;Q3U6M5	Q8R059;B1AV53;B1AV54	Q3U7P4;Q3TM10;Q6PGH2;Q3TJZ7	Q3UDS1;Q3U057;Q9QXK7;Q9CWL0;Q3TC91;Q8BRA5;Q497G2							A6H663;Q9JLV1;Q3TAM9	B7ZC46;B1AQY9;B1AQZ0;Q8CHH9;Q8CHH9-2	Q3U6D7;O55100-2;O55100	Q9CPS8							Q9EQF6	Q8BH43;Q3T9Z7;Q80UQ8	B2RUC7;Q9Z1Z2	Q52L50;Q99JI6					Q5BLJ7;P62301;Q921R2
	P48771	Q3TKM5;Q3TGZ3;P70404;Q684I8	Q3UDP0	Q3UDP0	Q91WU5	Q547R0;E9QAT0;Q6AXB7;P35922-3;P35922-2;P35922;D3Z6U8;E9QNF5;E9QAS8;P35922-9;P35922-8;P35922-7;E9QAS9;P35922-5;P35922-4;P35922-6;P35922-11;P35922-10;P35922-12;Q8BPK8			Q99LX0;A2A813;A2A815	B2RWB7;Q8BZA9					O88291;D3YXQ7	Q78IS1	P60670;Q3UE06;Q3UDU9;P60670-2	Q7TPW6;Q9Z2Z6							Q01853;Q8BNF8	Q61935;A0A087WRZ7;Q545G5;E9PWG4;Q6PCW9;Q545T7;P05977-2;P05977;P09542	Q60759;Q8BVD4	Q80TB8;Q8BL94							Q8BH44;G3UW48	Q3TVW1;Q8R1X6;D3Z3F8;Q8R1X6-2	Q3TVW1;Q8R1X6;D3Z3F8;Q8R1X6-2	B9EHY2;Q80W54					Q6PAL3;Q8BNE3;Q8BSZ2
	Q80Y52;P07901;Q3UIF3;Q3TKA2;A0PJ91;Q3TKB9;Q3TKG0;Q3TJU7;Q8C5U3	Q8BH44;G3UW48	Q9ER58;F6SLR4;Q80U51;Q6PAN0	P97807-2;P97807	E9QLB2;Q3UFF7	Q3UTI7;Q9QUR7			Q3UMP2;P38060	Q3U8Y7;Q3TKG4;O88685;Q3TKC2;A2AGN7;B7ZCF1;A0A087WPH7;Q3UD94					Q8R1Q3	Q3UD26;O35593;Q9CSU2	Q3TA59;F6Q269;D3Z1G6	F8VQE9;Q8VHH5;Q8VHH5-2;Q8BV81							A2ASS6;E9Q8N1;E9Q8K5;A2ASS6-2	Q91YS7;Q63932;Q3UPM3;M0QWN2	Q91YS7;Q63932;Q3UPM3;M0QWN2	E9PX48;A2A9M5;Q8R1A4-2;Q8R1A4							Q14AR0;Q9D8T7;F8WHU8;Q9D8T7-2	B2RUC7;Q9Z1Z2	D3Z4U0;B2RRT9;D3Z4T9;Q9R020;E9PUD0	E9Q6U4;Q3UWL8					Q5NC81;P15532;Q5NC80
	Q9R0P3;H3BLJ9;H3BJL6;H3BKH6;H3BJP2;H3BK43	Q8BTS4	Q99JR1;Q8BPC9	Q9ER58;F6SLR4;Q80U51;Q6PAN0	P99026	Q3TH57;Q8CGF7-2;Q8CGF7;Q8CGF7-3			Q9WVA2	Q3UMP2;P38060					P70670;Q60817;Q3UK68	Q99LB4;Q3UJ44;D3YTL5;Q3TNN6;P24452;D3YZN3;D3YU77;D3Z4K5	Q99JZ4;Q3TXJ4;P36536	E0CXN5;P13707							F8VQJ3;P02468	E0CXZ1;J3QM95;F8WGT4;Q8BYN5-2;Q8BYN5	Q9EQ80;Q3V2R8;D3Z0G0;Q8C608;Q5FWC8	Q9EPK6							B2RTM0;P62806	Q3UID0;Q6PDG5-2;Q6PDG5	Q9DCM0	Q80WQ2;Q8CCX6;Q8C907					P97868-2;P97868
	D3YZN4;Q7TNG0;D3Z1Z1;B2RQY8;Q3ULF4;D3YXB7;F6W695	Q8R404	O08832	Q99JR1;Q8BPC9	Q9D0L8;Q9D0L8-2;Q9D0L8-3;D3YYS7;D3Z478	Q8N7N5;Q8N7N5-2			Q5EBG8	Q5SU48;Q7TN98-4;Q7TN98-5;Q7TN98-3;Q7TN98-2;Q7TN98;Q5SU47;Q9D5G2;Q9D5F3;F6T0J8;A1A562;D3YUJ4;E9Q5X2;E9Q969;Q812E0					Q3U781;Q9D6W4;P84104-2;P84104;A2A4X6	Q9CRB6;Q1JPR8	Q9Z0Y1;E9Q919	E9Q0A7;Q4KMM3-3;Q4KMM3-2;Q4KMM3-4;Q4KMM3							D3Z589;D3YU22;D3YU59;Q3UH68-3;Q3UH68;Q8CGB7;Q3UH68-2	S4R2J9;Q3TLH4-5;Q3TLH4;S4R294	Q9D881;P19536	P14685;Q8BK46;Q3ULJ5							P11031	Q5NCJ9;Q8R1I1	Q3UMF0-3;B1AZ15;B1AZ14;Q3UMF0-4;Q3UMF0-2;Q3UMF0	A8DUK4;A8DUK7;A8DUQ5;A8DUQ1;A8DUL2;A8DUL0;A8DUP0;A8DUL7					A2RRJ4;Q924C1
	Q99LB4;Q3UJ44;D3YTL5;Q3TNN6;P24452;D3YZN3;D3YU77	E9Q8A3;Q8BKC8-2;Q8BKC8;Q8BKC8-3	Q9CXD6;Q9CXD6-3;Q9CXD6-2	A2AS45;Q68FH0-2;Q68FH0;A2AS44;Q05D18;Q3UIX3;A2AS47	O08749;Q3TIE8	Q91X52;A2AC16			Q99J57;Q3THS6;Q3TSS0;Q3UZA2;Q3TED1;Q3UAP7;Q6PE05	Q8R086					P99028	Q5BLK0;P35979;Q8C2K0;Q3TIQ2;Q6DI58	P28661-5;P28661-4;P28661-3;P28661-2;P28661	Q9D1F9;Q9Z295;Q6WG34							Q9CR70;J3JS94	Q80U93;Q8CHS9	Q5EAT0;P49962;Q3UIK3;D3YZX8	Q5D0A4;Q497P1;O35526;D6RFB9							Q8BKZ9	Q9D0B6;Q9D0B6-2	Q3UID0;Q6PDG5-2;Q6PDG5	Q8BZS9-2					Q8VC31;G3X927;D3YW42
	P62996;F8WJG3;Q5PR75	Q545G0;Q9R1P1	Q8R0Q6;Q3UHG5;Q6PDN6;Q62283	P56376;Q4VAF0;E9QJT5	Q8R086	D3Z0F5;Q3UIT2;O88545			Q9JKF6	Q3TCW5;Q99J45;D3YUV1					Q3TQR3;P59325;Q3TKY2;Q8BVV6;Q05CM5;Q05CH7;Q3TT65;Q6PHA6;Q05C65	Q921H8;Q3UPU8;H3BJZ9;H3BKL5;Q3TUU3;Q3UKM0;Q8VCH0;Q8R343;H3BKA1;H3BJC1	Q3TTF6;H3BKU1;Q8BIX1;G3UWS4;Q7TNP2;H3BLQ0;H3BLE7;H3BIV7	Z4YJU8;Q5DTL1;E9PUQ5;Q921M4-2;Q921M4							Q6P264;Q7TQJ3;Q9ER35	Q60759;Q8BVD4	P47963;Q5RKP3	D3Z0L4;Q9D9P1							P68369	D3Z3A0;Q9DCL8;Q8BVM6;Q9CT86	Q9D0B6;Q9D0B6-2	Q3UG16;P35585					P50544;B1AR28;Q3UJR6
	Q545G0;Q9R1P1	Q8CFZ2;Q62030;E9Q4D0;F6XJP7;H3BJL4	B2RXC1	O08832	Q9CQU1	Q14C24;Q9D883;G3UW94			P42128	Q66JR8					Q3UKV4;D3Z5N6;Q61103;F8WIP7	Q60759;Q8BVD4;D3Z4I2	Q5M9N8;Q3UBI6;P14148;Q3TK73;F6XI62	Q91X95;Q3UPA1;P21278							Q5SWJ8;P60060;G3UWH0	Q9D881;P19536	Q3U5N4;P54923	Q9WV55							Q6P1J1;Q3TXY0;P97427;Q3TY94	Q3SXD3	A2AT37	Q3UDS1;Q3U057;Q9QXK7;Q9CWL0;Q3TC91;Q8BRA5;Q497G2					O88630;Q80UU0
	Q91XH7;B9EKG3;Q9Z0L8-2;Q9Z0L8	Q80Y52;P07901;Q3UIF3;Q3TKA2;A0PJ91;Q3TKB9;Q3TKG0;Q3TJU7;Q8C5U3	Q8BU25	Q8R3G9	P63280;Q8CFZ0;G3UYP0	Q7TNG5;E9QK48;Q7TNG5-2;D3YWS2;D6RGM3			P46471;Q3UIH5;Q8BVQ9;Q3U5V3	A2A6M1;Q9CZ28					Q8K411-2;Q8K411;Q8K411-3	Q3TF41;Q8BSH9;P28656;E9PW66;Q9CSP8	Q9CRA5;Q3UWP6;Q3TIL4;Q05BZ0	Q8C0D5							O70305-2;E9QM77;O70305;O70305-3;F6U2C2;Q3UX07;F7B6X4;Q3UX51	P97855;Q571F9;Q3UR88	Q3V038	Q548T0;Q64324;Q99J48;F8WGM5							Q6PIU9	Q6ZWZ2	P11031	B9EKK3					E9QN52;Q91WK0-2;Q91WK0
	Q8VHM5;Q3U8W9;Q3UMT8;Q99KG1;Q3UZI0;Q3UKV5;Q9CT37;F7B5B5;A2AW41	E9Q983;Q8K4L2;E9Q3Z5;Q8K4L3;E3VVQ8	Q8R3G9	B2RXC1	Q91V64;Q9D096	A2AJ72;Q3TIX6;Q3ULP9			Q8R4X3;Q6ZQ53;F6YJB6;V9GXJ1	Q5F285					Q9DB77	Q3THH1;Q922R8	Q3TCN5;Q91X51	B7ZW94;Q8C3F2;Q8C3F2-3;Q3V3X9							Q99JY0	Q5SUR0	Q80U93;Q8CHS9	Q3ULF7;Q3TWJ4;Q3TGW0;Q99JY9;Q3TGE1							Q8K370;Q9CRH8	Q3UMF0-3;B1AZ15;B1AZ14;Q3UMF0-4;Q3UMF0-2;Q3UMF0	E9QN44;Q8CIM3	Q8BNU0;Q8BNU0-2					Q9D1M0
	Q8BNH4;Q3UHC4;Q3UFZ8;Q80U27;Q61771	Q3UQN2;F6RG68;J3QPQ1;Q3UQN2-3;Q3UQN2-2	A2AS45;Q68FH0-2;Q68FH0;A2AS44;Q05D18;Q3UIX3;A2AS47	Q8BU25	Q3U3H5;Q68FH4;Q8BUU7;Q3U728;Q8BWB2	Q3UYH7;Q8BVT9			Q5FWB7;P05064;A6ZI44;Q6NY00;D3YWI1;Q9CPQ9	Q9CZL5					Q9CZL5	Q8BGD8	Q8VCQ8;E9QA16;E9Q0M9;D3Z6I7;E9QA15;S4R1T7;Q3UGC3	Q8CGY8							Q3TUF3;O35887;Q3UG11;Q3TQD1;G3UWV3;G3UWR0;G3UY49	Q3U5N4;P54923	Q5SUR0	Q9JKK1-2;Q3UA21;Q3TX70;Q9JKK1							Q99J57;Q3THS6;Q3TSS0;Q3UZA2;Q3TED1;Q3UAP7;Q6PE05	E9QN44;Q8CIM3	B2RRH9;Q3THK7	Q8CI51;Q8CI51-2					Q8VDS8-3;Q8VDS8;Q8VDS8-2;D3YY98
	Q8C476;Q543C2;Q99PM9	Q9R1P0;Q3TL95;Q3UCF0;E9PW69	P56376;Q4VAF0;E9QJT5	Q8R0Q6;Q3UHG5;Q6PDN6;Q62283	Q8K0U4;Q3TNR3	B1GX80;B1GX81;Q61036-2;Q61036;A3KGC5			A2AD84;A2AD85;Q99JT2	Q8BTW2;Q3U8X1;Q9DCH4;Q6IRT4;Q3UVY8					Q8BFZ3	Q3TIU4	Q9CQK7	Q8K4P0							Q1WIL9;E9PYN1;Q8R5M8-4;Q8R5M8-3;Q8R5M8-2;Q8R5M8;Q8R5M8-7;Q8R5M8-6;E0CY16;Q8R5M8-5;Q9QYL3;Q9QYL4	P97450;E9QAD6	P97855;Q571F9;Q3UR88	A2AFQ0;Q7TMY8;Q4JG03;Q7TMY8-4;Q7TMY8-2							P61965;Q3UNQ3;F6Q3W0	A2AT37	Q9JKF6	P21981					Q3UZJ4;Q61151
	Q9CZC8	Q8BTW2;Q3U8X1;Q9DCH4;Q6IRT4;Q3UVY8	S4R1W1	Q9CXD6;Q9CXD6-3;Q9CXD6-2	Q8C196	Q14C26;Q9EP72			Q8CAY6;G3XA25;Q80X81;F2Z459	A2RSV8;P19783					Q61699;Q61699-2;E9Q0U7	Q80T06;Q91VK2;P57776;E9QN08;D3YY68;D3YUQ9;D3YZT9;Q8BW50	Q8K0C9	H3BK48;H3BKH2;E9Q3S2;H3BJS0;Q8R311;H3BL19;Q3TZZ3;H3BJI6;H3BK44;E9PY90;H3BKL6;H3BJ71							P31324	Q3UGK7;Q3UQ99;Q7TPN5;Q3TXX8;Q91YD9	B7ZC46;B1AQY9;B1AQZ0;Q8CHH9;Q8CHH9-2	Q3UA32;Q6PB93;Q3UM52;Q6PB93-2							P97449;Q3UP74;Q3TB69	Q3UE99;A2RTI3;O89017	Q3UE99;A2RTI3;O89017	F6TCF9;Q60739-2;Q60739;Q9CUY1					Q540D7;Q9JII6;Q80XJ7;Q3UJW9;B1AXW3
	E9QKB2;Q9JKS5	Q9DAR7;Q3TBW9	Q14BZ3;P70202	Q14BZ3;P70202	Q9WVA2	Q80XK7;Q9D2N9			Q3TJ01;Q99LF4	Q9CWI9;Q9CZI5;P62267;Q9CSN9;Q497E1					Q9CQX2;Q3TN44;Q3TH64	S4R1P5;Q91ZU6-4;E9Q9X1;Q91ZU6;Q91ZU6-3;A0A087WSP0;Q91ZU6-2;Q6ZQ59;S4R1Y6;A0A087WRB8;A0A087WPR7;A3KMF5;Q91ZU6-6;Q80VL5;S4R2C6;S4R2A8	Q642K1;Q58EW0;P35980;Q0QEW9;G3UZJ6;G3UZK4	G5E8G0;G3X9W0;F6ZV59;Q60668-4;Q60668-2							Q9WVA4	Q3V038	P31324	Q64685;Q9JJM6							Q6ZWM4	Q8K411-2;Q8K411;Q8K411-3	Q5NCJ9;Q8R1I1	Q9D365					Q3V3N6;P61202;P61202-2;A2AQE4;Q3UK65
	Q6R2P8;Q1RLK4;Q1LZM6	P62996;F8WJG3;Q5PR75	Q542R8;O70443;Q3UYF9	S4R1W1	P50516;P50516-2	Q8CCK0;Q8BP16;A0PJB8			Q564F4;Q3TII0;P80315;Q3UJZ8;G5E839	A0A087WQH8					Q78XF5	D3Z6P0-2;D3Z6P0;F6S5U2;F6Q519	Q5XJF6;P53026;Q3U561	P97868-2;P97868							Q8BYK6-3;Q8BYK6;Q7TN20;Q8BYK6-2;Q8BVC6	E9QB01;P13595-2;E9Q589;P13595-3;P13595-4	Q3UCC5;Q6P8I4;F8WI88;Q3TM89;Q3KQH9;D3YWA4	Q99K23							Q9D1P4	Q6P5B5;Q9WVR4	A0PJL3;Q6PDS3;Q6PDS3-3;Q6PDS3-2	B2RUA5;Q7TSI3					P63154
	Q5F2E7;Q5F2E7-2	Q91XH7;B9EKG3;Q9Z0L8-2;Q9Z0L8	Q8R121;Q8R121-2	Q542R8;O70443;Q3UYF9	Q3TST0;Q8K1R3;Q3UNL5;Q3TN29;Q8K1R3-2	Q6F4J1;P83887;Q6F4J0;Q8VCK3			Q9CWE0;D3YW54;D6RCX5;D3Z0X8	Q3TUQ5;O35691;Q9CV89					Q9CQ92;G3X9U9	Q5BLJ9;P61358;Q9CSM4;A2A4Q0	Q9JKB1;Q8BWQ9	P18654;B1AXN9;A7E215							D3Z0V7;E9QLZ1;P62500-3;P62500;D3YW86;Q3UXU0;P62500-2;H3BLI9;A7LCN1;Q9CVK3;Q6PE86;Q148S0	Q9D6U8	Q9D6U8	B2RSU7;E9PWI6;Q8CHG3;E0CYI9							Q6P1B6;Q6NZN9;Q8BH69	Q9JKF6	Q8K411-2;Q8K411;Q8K411-3	Q8K273					E9QKT0;Q63943-2;Q921S6;Q63943;Q3URR2;E9Q5E0
	Q8BH44;G3UW48	Q9JIQ3;Q7TPS3;Q8R1D8;D3Z3K5;D3Z2Q3		Q8R121;Q8R121-2	D3Z7X0;D3Z2B3	Q542I7;Q3TX23;O88653			P57759	Q2UZW7;Q6PER3					Q3TWG5;Q8R1Q8	Q8VCQ8;E9QA16;E9Q0M9;D3Z6I7;E9QA15;S4R1T7;Q3UGC3;F6QLP8;F6ZAW1;Q3TUS1;E9Q9F3;F6RGN9;F6T2Z7;Q7TMN5;Q8VD79;REV__B2RXW8;REV__B2RXQ2;REV__B8QI33	P57759	Q9R1T2;Q9R1T2-2							B9EHZ5;Q9JLB0-2;Q3UN60;Q9JLB0;Q6NSS8;Q811G2	P31324	Q9CR70;J3JS94	Q8BMA6;A2AAN2;Q8K258							P36552;Q3U029	B2RRH9;Q3THK7	Q6ZWZ2	Q8K3X6					Q4FJY3;Q62313
	Q9D0M5;D6RIN4	Q8VDS4			Q8C0Z3;Q8CFF2;Q8CGI3;Q9CT17;Q6NSR2;Q3UIX4;E9Q6E5;D3Z4B0;B7ZNC5;Q8BV04	Q9D1I5			Q3UBA6;P63017;Q3U9L2;Q3TEK2;Q504P4;Q3TRH3;Q3TQ13;Q3ULM1;Q3TH56;Q3TZJ3;Q3KQJ4;Q3UDS0;Q3TH04;Q3TB63;Q3UXU1	Q3TLQ4;P58064					P08030	E9PZF0;Q5NC82;Q01768;B0LAA8;Q8R4B4;Q5NC79	Q921H8;Q3UPU8;H3BJZ9;H3BKL5;Q3TUU3;Q3UKM0;Q8VCH0	Q5SWZ5;F6S5I0;F6RND9;P97434-3;P97434;P97434-5;P97434-2;Q8CHC7;P97434-4							Q3TK27;Q8CI11;Q8CI11-2	Q9CR70;J3JS94	Q3UGK7;Q3UQ99;Q7TPN5;Q3TXX8;Q91YD9	Q3UE40;P27601							Q9DB77	Q61206;Q8BTA2	P47963;Q5RKP3	Q9JKV1;Q8VCI8;D3YUD8					Q5XJF6;P53026;Q3U561
	E9QN52;Q91WK0-2;Q91WK0	Q3ULN2;P62915;Q3UZJ3;Q3UNY0			Q8BLI4	Q8CFZ2;Q62030;E9Q4D0;F6XJP7;H3BJL4			Q2UZW7;Q6PER3	Q3U8F7;Q3U3C2;Q9Z0J0;Q3TXQ4					Q9DB20;Q3THG0;Q3TF25	Q3TZ17;O70400;S4R1V0	Q3UHW2;Q3TT11;P51660	G5E8Q5;Q3TSY8;G5E8Q6;Q8BZJ7-4;Q8BZJ7-2;Q8BZJ7							Q9CRC6	Q6P1B9;O08539-2;O08539	Q5BLK1;P62754;Q8BT09;Q3TL53	P83741-4;P83741-5;P83741;P83741-2;P83741-3;Q6SLK2;P83741-6							Q9JKF6	P47963;Q5RKP3	Q99J57;Q3THS6;Q3TSS0;Q3UZA2;Q3TED1;Q3UAP7;Q6PE05	Q3T9Z2;Q91Z53					Q8VDN4;D3YUR9
	Q9R1P0;Q3TL95;Q3UCF0;E9PW69	Q3TWG5;Q8R1Q8			Q9JKF6	Q8R3Y8-2;Q8R3Y8			A0A087WQH8	Q8R0M2;Q3U548;Q91ZJ5-2;Q91ZJ5					Q99KP6;Q99KP6-2;Q4ADG5;Q99KP6-3	Q3UPH1	Q6RI64;O09061	E9Q481;Q6P2K6							Q80VP1;Q80VP1-2	F8VQJ3;P02468	E9QB01;P13595-2;E9Q589;P13595-3;P13595-4	Q8K064							Q64374	Q6P1B6;Q6NZN9;Q8BH69	Q6P5B5;Q9WVR4	Q8K1E0;I1E4X1;Q8K1E0-2;H3BJE3;H3BKJ7;H3BJ02;H3BKP0					Q9D1M7
	Q8CBE6;Q8BPJ7;Q544G5;Q62165;D9IFT4	Q8BK29;B1AT82;Q9D0M1;B1AT83			Q64737;Q3UJP8;Q3TH49;Q64737-2	Q8K3H0			Q3U484;Q62095	B1AU76;B1AU75;Q99MD9-2;Q99MD9					Q9CPT4	A1L3B8;P26516	P54775;Q569X4;Q3TFA5;Q8BKU2;Q3TJ97;Q3UBF0;Q52L53	Q9JME5							Q9ERT9	Q9D1P4	Q52KC1;P10630;Q8BTU6;E9Q561	Q6PAC1;P13020-2;Q3UCW8;P13020;Q3U9Q8;Q3TGJ9							Q52KC5;Q9CQP3	Q99J57;Q3THS6;Q3TSS0;Q3UZA2;Q3TED1;Q3UAP7;Q6PE05	Q61206;Q8BTA2	Q9CQ19					A2A7Z4;Q78IG7;Q9CQH7
	Q58EV5;P63158;Q8C7C4;Q8BNM0;Q6P202;Q497Z6;Q8BQ02;Q3UBK2;Q3UJK0;D3YZ18	Q8CGA0			P09411;S4R2M7	S4R248;S4R221;Q8C0D4;S4R203;B2RUJ8;S4R2V0;S4R1B0			Q9D3M4;Q91V77;Q9JL08;P56565	Q8QZZ7;G3X9K8					D3Z6P0-2;D3Z6P0	B2MWM9;P14211;Q3UWP8	F8VQ28;Q8VI36-2;Q8VI36;Q3UG90	Q3TM09;Q5QNU0;Q8CEC0-3;Q8CEC0-2;Q8CEC0;Q8BQF0							P24529;Q3UTB3;E9Q9G5	Q9EQ80;Q3V2R8;D3Z0G0;Q8C608;Q5FWC8	Q9QZE7;Q3TXK6	O35114							Q8C2Q8;Q9D9D7;Q3UD06;Q91VR2;A2AKU9;Q9ERA8;A2AKV2;A2AKV3;A2AKV1	A0PJL3;Q6PDS3;Q6PDS3-3;Q6PDS3-2	Q6P1B6;Q6NZN9;Q8BH69	Q99L04;Q3TVU9					Q3UPH1
	Q9CSN5;Q9D3J1;Q9CXG3;Q9CSB0	Q5F2E7;Q5F2E7-2			Q8BIV6;G5E895;Q8CI22	E0CXZ1;J3QM95;F8WGT4;Q8BYN5-2;Q8BYN5			P34022;H7BX22;Q3U6M5	P10853;A0JLV3;B2RVD5;Q8CBB6;Q921L4;Q8CGP1;Q8CGP2;Q8CGP2-2;A0JNS9;P70696					Q6A0D1;Q9CRD2	D3Z7V3;H7BX64;Q3URD3-2;Q3URD3;F8WIH0;F6UV57;F6YCM8;Q3URD3-5;Q3URD3-4;Q3URD3-3;D3YV81;D3Z0N1;F6WY34;Q3TQF4	Q3TYL7;Q3TU79;Q3TIT6;Q9QYJ3	Q6PEE6;Q69ZW4;P17427;Q3U7X9							Q3U0V1	Q6P5B5;Q9WVR4	F8VQJ3;P02468	Q5RJV4;Q7TNU0;Q66JR7;Q9D0F9;Q3U6X6							P70333	Q80Y09	Q61177;Q60737;Q9D0E8;Q8CD20	E9PYJ7;Q6ZPQ6-2;Q6ZPQ6;Q6NS55;Q3UEE4					Q3UPL0;Q3UPL0-2
	P61082;F7CDT0;F6WMC0	Q8VHM5;Q3U8W9;Q3UMT8;Q99KG1;Q3UZI0;Q3UKV5;Q9CT37;F7B5B5;A2AW41			Q3TF14;P50247;Q3U4D1;Q5M9P0;Q3U5U5;Q8BPI7	Q9Z130			Q3TUQ5;O35691;Q9CV89	A2AJ72;Q3TIX6;Q3ULP9					D3YWX2;E9Q803;F6YTL8;Q9R0I7	Q62084;Q3TMQ9	Q8R3I3	Q8BU14;Q9CRY0;Q05DA2							Q8BWT1;Q3UKH3	Q9QZE7;Q3TXK6	P97450;E9QAD6	Q8CIG8							Q3TDD8;Q3TSY9;Q8BGD9;Q3UGC0;Q3THB0;Q922K6;B2RWE8	Q3TYL7;Q3TU79;Q3TIT6;Q9QYJ3	Q80TZ3;Q80TZ3-2;Q80TZ3-3	G3X9N6;B9EJ86;Q69ZJ4					Q5M9N8;Q3UBI6;P14148;Q3TK73;F6XI62
	F7BJK1;Q2TJI9	Q6ZQ47;Q3UYC8;A2BDX0;Q5BL11;Q5RKY4;Q9Z103			Q3TKM9;Q9CPW4;Q3UC32;Q3UA72;Q3TK56	A7VMV2;Q99KP3			P12968	Q8BJA6;Q3UY68;Q91YS8;Q3TDH8					P70122;F6TN03	Q01853;Q8BNF8	Q3ULG4;O35226-2;O35226-3;O35226-5	B1AZI6;Q3US09							Q3TGU7;P50580;Q05BN2;Q3UMW2;D3YVH7	Q3TLE4;Q8BQ46;F6QCI0	Q9CWJ9	Q9DBR7;Q9DBR7-2							A2AD03;Q3UR39;Q9QXG2;Q8CBI2	Q71LX8;P11499	Q8BJF9	Q4FK79;Q9DCF9-2;Q9DCF9;Q3TS69					Q80U93;Q8CHS9
	Q9JLB9;Q9JLB9-3;Q9JLB9-2	S4R1M9;Q8R2T7;S4R296			Q9Z2X1;Q9Z2X1-2;J3QM80;J3QMT0	F6Y616;Q8VE62;D3Z3J6;G3UYE5			P46737;P46737-2	Q8C5B4					Q8BTX9	Q3U3S0;P58404-2;P58404;V9GXE7;V9GXT1;V9GXI9;V9GX64	B2RQC6;E9QAI5;G3UWN2;B2RQC6-2;Q6P9L1	Q9JJ62;Q3UJF5;Q9Z321;D3YWY3;F6SDD7							Q9D1M0	Q5BLK1;P62754;Q8BT09;Q3TL53	Q1WIL9;E9PYN1;Q8R5M8-4;Q8R5M8-3;Q8R5M8-2;Q8R5M8;Q8R5M8-7;Q8R5M8-6;E0CY16;Q8R5M8-5;Q9QYL3;Q9QYL4	Q8VCF0;Q3U5B1							O88952;Q3TTY6;Q3TS99	Q3U6D7;O55100-2;O55100	Q3TYL7;Q3TU79;Q3TIT6;Q9QYJ3	Q9WUP7-2;Q9WUP7;A0A087WP81					P14152
	N0E4C0;P67871;N0E4C5;G3UXG7;G3UZJ5;N0E463;G3UXU2	Q2UZW7;Q6PER3			Q3U9R7;Q3UB84;P47791-2;P47791;Q3UAS7;Q3TXK9;Q3TWI5;Q91Z57	Q9CSH3;Q8R2P7			Q3U9X2;Q9ES84;O35901;O35900;Q9EP83	H3BJ30;H3BJW3;Q6NVF9					P61022;B0R091	Q6P1A9;Q5EBG5;Q58ET1;Q80UT7;P12970;Q8CDE3;V9GX35;F6SSI5	D3Z0L4;Q9D9P1	P39098-2;P39098							Q3UW40;Q8BP67;Q8BT08;Q9CS31	Q52KC1;P10630;Q8BTU6;E9Q561	Q9D1P4	Q8BXJ6;Q8BGV0;D3YV21							Q925E7;F6RV17	Q2M4J2;Q9Z1B3-2;Q9Z1B3-3;Q9Z1B3;Q6ZQ92;Q3UPW0	Q71LX8;P11499	Q3U896;Q9Z2D0					Q9CX30-2;Q9CX30;D3YY42
	Q61584-4;Q61584-3;Q61584;Q61584-5;Q61584-6;Q61584-7;Q61584-2	Q61584-4;Q61584-3;Q61584;Q61584-5;Q61584-6;Q61584-7;Q61584-2			Q3UBP6;Q3UBQ4	Q5SVF7;O55125;Q3UGS1;Q5SVG6			B2RWB7;Q8BZA9	Q8K370;Q9CRH8					Q5FW97;P17182	Q4FK49;Q9D819;Q8BTY3;Q3UA53	P68040	Q61823							Q8VDM1;F7C2Y9	Q9CWJ9	Q6P1B9;O08539-2;O08539	Q8K2L8;Q3UGE1;Q8C0C3							Q8VE88-2;Q8VE88	Q80Y52;P07901;Q3UIF3;Q3TKA2;A0PJ91;Q3TKB9;Q3TKG0;Q3TJU7;Q8C5U3	Q80Y52;P07901;Q3UIF3;Q3TKA2;A0PJ91;Q3TKB9;Q3TKG0;Q3TJU7;Q8C5U3	P60670;Q3UE06;Q3UDU9;P60670-2					Q9Z0Y1;E9Q919
	E9Q4M4;Q91VN4;Q9DA45;Q3TJS8;Q8C2Z6	Q9R1K9;Z4YJH1;B1AUQ7			Q8C1A5	Q6PDI4;Q3USH5			Q8C196	Q3TT94;Q6P1F6;Q571J7;Q3TPC5;Q9CWU3					Q60951;Q3UBT1;P62960;Q71V06;Q810K5;Q60950	Q3TRK3;Q9QXS6-3;Q9QXS6;Q9QXS6-2;F7CPL2	Q58E70;P21107-2;D3Z2H9	E9Q4G7;Q3U772;E9PWB2;Q8BK63;Q6PJ87;Q3U844;H7BXB1;E9Q3W1;Q8BK63-2;E9Q2U6;Q3TVX1							O88967	Q3UCC5;Q6P8I4;F8WI88;Q3TM89;Q3KQH9;D3YWA4	Q6P5B5;Q9WVR4	O35075							P61164	Q8C0C7;E9PWY9;Q8BJG2;Q8BXN0;Q4FJQ2	Q3U6D7;O55100-2;O55100	E9PYK3;Q6A0B1					Q3UMT1
	Q3ULN2;P62915;Q3UZJ3;Q3UNY0	P48771			H3BJ30;H3BJW3;Q6NVF9	Q99KF5;P00493			E9PV44;O35143	Q9QZ83					Q3UE99;A2RTI3;O89017	Q3TTF6;H3BKU1;Q8BIX1;G3UWS4;Q7TNP2;H3BLQ0;H3BLE7;H3BIV7	P27773	Q8K566;Q9DBE0							Q2M2Q8;Q3TE41;Q920Q6-3;Q920Q6-2;Q920Q6;B1AT13;Q8CD63;Q32LZ4	Q1WIL9;E9PYN1;Q8R5M8-4;Q8R5M8-3;Q8R5M8-2;Q8R5M8;Q8R5M8-7;Q8R5M8-6;E0CY16;Q8R5M8-5;Q9QYL3;Q9QYL4	Q7TMK9-2;Q7TMK9;G3UZI2;G3V018;G3UZ48;G3UXJ6	Q60936;F7B1B6;Q60936-2							D3Z589;D3YU22;D3YU59;Q3UH68-3;Q3UH68;Q8CGB7;Q3UH68-2	Q60759;Q8BVD4	Q80Y09	Q9JIS5					Q80UU9
	Q3THG9;A2A4P3;A2A4P4	Q9CSN5;Q9D3J1;Q9CXG3;Q9CSB0			P68372;Q9CVR0;Q9DCR1	Q99LU0;Q3TJ28			P17751;H7BXC3	P34022;H7BX22;Q3U6M5					P62274	F7BJK1;Q2TJI9;Q2TJI8	Q3UPH1	Q3TF02;Q3TDF8;Q8BWY3;Q3TL10;Q3U6V5;P70199							Q3TVW1;Q8R1X6;D3Z3F8;Q8R1X6-2	Q7TMK9-2;Q7TMK9;G3UZI2;G3V018;G3UZ48;G3UXJ6	Q3UC02;Q9DB79;P62281;Q9D0P6	F8VQE9;Q8VHH5;Q8VHH5-2;Q8BV81							Q04750	Q80TZ3;Q80TZ3-2;Q80TZ3-3	Q52KC1;P10630;Q8BTU6;E9Q561	Q9DBG7					B1AUN2;B1AUN3;Q3UKV0;A4FUS0;A0AUM9
	E9Q983;Q8K4L2;E9Q3Z5;Q8K4L3;E3VVQ8	Q9R0P3;H3BLJ9;H3BJL6;H3BKH6;H3BJP2;H3BK43			Q3UNN4;Q3UPK0;Q3UMX0;P97496-2;P97496;D3Z1X8	Q9DBS5			P97300;P97300-1;H3BIX4;Z4YLB7;P97300-3	Q544I1;Q8VCV2;Q9QYF9;Q8CBD0					P50518	O08807;Q9D634;B1AZS9	Q3UVN5;Q9CZ44;Q9CZ44-3;Q3KQQ1;A2AT02;Q9CZ44-2	Q3TW51;Q78PY7;Q3UZI3;Q3TRW3							Q8VDP4	Q9R0P4;D6RI64	F7DEU6;P50096;E0CYE2	Q3TCH7;Q8R1T2;Q3UD60							Q8VIJ6;Q3TZL2	Q8BJF9	Q60759;Q8BVD4	Q9EQQ9-3;Q9EQQ9					Q3UN48
	Q80X50;Q80X50-5;Q80X50-4;Q80X50-3;Q812D5	A0JNY3;Q8BUV3			O88587-2;O88587	E0CY18;A0A087WPF5;Q91X58			Q4FK11;Q3UM20;Q3TF40;Q99K48;Q3TTV7;Q3TFC2	Q8BM84;P70372;Q8BVF8;Q8BTQ1;Q3UFF9					Q66JR8	E9Q1G8;Q8C2A3;E9Q9F5;O55131;Q3UNN1;Q5DTS3;Q8C752;Q3UGE0	B2MWM9;P14211;Q3UWP8	Q3THE2							Q3UM23;Q91VI7	Q6XLQ8;Q3TL33	Q5F2E7;Q5F2E7-2	Q9DC51;Q3TJH1							Q3TPZ5;Q99KJ8	Q921W2;Q545C1;P70318;D6RGU1	Q3TVP0;P17095-1	P63154					Q9QZH3
	Q8CGA0	P61082;F7CDT0;F6WMC0			Q03517	B2RUK5;Q3ULD5;Q6PD20			Q3U3H5;Q68FH4;Q8BUU7;Q3U728;Q8BWB2	Q921H8;Q3UPU8;H3BJZ9;H3BKL5;Q3TUU3;Q3UKM0;Q8VCH0					Q9D1M0	Q5XJF6;P53026;Q3U561;Q99JL6;D6RE43	Q3TWE3;Q3THC3;Q3TF72;P09103;Q3URP6;Q3UBY9;Q3UJA8;Q3UA23;Q3TIM0;Q3TGS0;Q3UDR2;Q3U738;Q3TT76	Q8BLN5							Q3UAT9;Q3U9N8;P24547;Q3UPJ2	Q5F2E7;Q5F2E7-2	F6ZDS4	Q8BRF7;Q8BRF7-3;Q8BRF7-2							G3X9L6;Q9DCX2;B1ASE2	Q61177;Q60737;Q9D0E8;Q8CD20	Q2M4J2;Q9Z1B3-2;Q9Z1B3-3;Q9Z1B3;Q6ZQ92;Q3UPW0	Q3UUH0;Q91YI0;E0CXM2;E0CY49					Q64514-2;Q3TW28;Q3U4M7;Q3TB11
	Q9D6L8;Q9D6L8-2	E9QKB2;Q9JKS5			Q4W8U9	Q80VD1			Q8BTW2;Q3U8X1;Q9DCH4;Q6IRT4;Q3UVY8	P52480					Q504N0	Q80TM2;P26039;Q3UHS6;Q0V930;Q3TBC3;A2AIM2;Q8C9Z8;F6SX70;F6S1V7	Q6PIP5	D3Z7R9;Q640L3;Q640L3-2;Q640L3-3							E9QB01;P13595-2;E9Q589;P13595-3;P13595-4	Q9CXI0	Q8R059	Q8CDM8							Q6PDL0	Q80U93;Q8CHS9	Q8C2D2;P70362;Q9CWQ7;Q9CZJ3	Q7TSV4					Q8VE47;F6VRI6
	Q3TWG5;Q8R1Q8	Q58EV5;P63158;Q8C7C4;Q8BNM0;Q6P202;Q497Z6;Q8BQ02;Q3UBK2;Q3UJK0;D3YZ18			Q99K28;Q99K28-2	Q7TMW1;Q6ZPH4;Q8C2E3;Q91YS2;P46061;Q3ULJ9			Q3TGH8;O88811;O88811-2	Q8C196					Q8C570;Q8CBU3	Q3TLE4;Q8BQ46;F6QCI0;Q3V452;Q3V2Z2	Q9D7E3	Q8BPF9;Q545V8;O54833;Q8CDH5							P97300;P97300-1;H3BIX4;Z4YLB7;P97300-3	Q8R059	A2RRK3;O54988-2	Q8BHS6							Q9DAB3;Q9CQW2	Q9ESU1;Q6ZWP4;Q9Z0H3;Q9ESU0;Q3UDA4;Q9Z0H3-2;Q9JJD1	Q80U93;Q8CHS9	Q8BGW6-2;Q8BGW6					Q99KV1
	Q9DAR7;Q3TBW9	Q9CZC8			E0CYX9;Q3TC33;E0CYP1;Q3TC33-2	Q9DC36;Q8CDE0;Q5SS83;Q3UEG9;Q60634-3;Q60634-2;Q60634			Q3TLQ4;P58064	Q3UBA6;P63017;Q3U9L2;Q3TEK2;Q504P4;Q3TRH3;Q3TQ13;Q3ULM1;Q3TH56;Q3TZJ3;Q3KQJ4;Q3UDS0;Q3TH04;Q3TB63;Q3UXU1					Q91VM2;P62320	F8WHT3;Q7TPM1;F7AYW2;A2AN33;Q80TY7;F6Q3E1;F6V431;Q7TPM1-2	A2AQA9;A2AQB2	Q9CQ80;A8XY17;A2A4J8;A2A4K0;Q9CQ80-2							Q3TC93	Q3TYL7;Q3TU79;Q3TIT6;Q9QYJ3	Q3TYL7;Q3TU79;Q3TIT6;Q9QYJ3	A2VDG1;Q8CJG1;Q8CGU0;Q8BJP2;H3BJ70							Q9D2R6;E9Q6W2	Q3TVP0;P17095-1	Q8C0C7;E9PWY9;Q8BJG2;Q8BXN0;Q4FJQ2	Q9Z0Y1;E9Q919					F8VQC1;Q3UZL8;A0JLN1;E9Q740
	Q8BK29;B1AT82;Q9D0M1;B1AT83	B2M1R6;P61979-3;Q3U9Q3;Q3U6X2;H3BKD0;D3Z5X4;H3BKI8			E9Q3H7;E9Q0B6	Q6NXW0;Q9WUA6-2;Q9WUA6;Q8C6X4			Q64737;Q3UJP8;Q3TH49;Q64737-2	P68040					P28659-4;P28659-2;P28659-3;P28659	Q91WM3	Q80TM2;P26039;Q3UHS6	G3X972;Q80U83;Q3V222;Q8R2V9							Q9EQS3;Q3V1X1;Q8C5M8;A2A7K5	Q3UC02;Q9DB79;P62281;Q9D0P6	Q9D8U3	Q8C0E2							Q14AQ1;P62334;Q8QZS9	Q52KC1;P10630;Q8BTU6;E9Q561	Q5BLK1;P62754;Q8BT09;Q3TL53	Q80X71;D3Z191;D3Z6E0;D3Z0M2;Q9D3D8					Q3UA32;Q6PB93;Q3UM52;Q6PB93-2
	Q3ULW0;P62827;Q14AA6	Q9D486-3;Q9D486;B2RY70;Q9D486-2			Q543K9;P23492	J3KMT7;Q08122-4;E0CXS2;E0CY14;F8WIE2;E0CXS9;Q80TC1;Q08122-2;Q08122-1;Q08122;F6TS96;Q3TY99;E0CXU1			P50429;B2RWQ7;P50429-2	D3YZZ5;E9Q7G1					P46471;Q3UIH5;Q8BVQ9;Q3U5V3	Q9D0J4	Q78IS1	Q8BP47							O55222	F6ZDS4	Q9R0P4;D6RI64	G5E8R1;G5E8R0;E9Q455							Q3U0V1	Q3UBU9;Q62446	Q9ESU1;Q6ZWP4;Q9Z0H3;Q9ESU0;Q3UDA4;Q9Z0H3-2;Q9JJD1	Q6IRU2					Q9D6Z1;Q3USZ5
	S4R1M9;Q8R2T7;S4R296	Q3THG9;A2A4P3;A2A4P4			Q564F4;Q3TII0;P80315;Q3UJZ8;G5E839	O35127			O88587-2;O88587	P62996;F8WJG3;Q5PR75					Q5SUR0	Q3TQZ7;Q80W82;Q80W81;Q78GB8;Q8C9D4;Q80W80;E9QN59;Q61831-2;Q61831;Q544A0;A6P3E4;Q7TSJ7;G3X8U9;Q91Y86	A8C1T7;Q91XD7	Q7TMC8;Q8C7W3;Q7TSB1;Q8CI18;Q6KAP2							Q5GQ64;Q9Z0F7	Q52L87;P68373;Q3TIZ0	Q9CXI0	Q3TUQ7;Q5EG47							Q80Y52;P07901;Q3UIF3;Q3TKA2;A0PJ91;Q3TKB9;Q3TKG0;Q3TJU7;Q8C5U3	F6ZDS4	Q3UBU9;Q62446	Q544T5;P00375					Q8C2D2;P70362;Q9CWQ7;Q9CZJ3
	O88587-2;O88587	D3Z4U0;B2RRT9;D3Z4T9;Q9R020;E9PUD0			Q60668-3;Q60668;Q3UXC8				Q9D0T1;E9PZS4	Q91WT9-2;Q91WT9					Q3THA6;Q8BL97-3;Q8BL97-4;Q8BL97-2;Q8BL97	A2RS22;Q9WUM3;D3YUG6	Q3U8Y7;Q3TKG4;O88685;Q3TKC2;A2AGN7;B7ZCF1;A0A087WPH7;Q3UD94	Q6P2L7;E9PZJ6;Q6P2L7-2;Q6P2L7-3;A2AR60							Q5BLK0;P35979;Q8C2K0;Q3TIQ2	A2RRK3;O54988-2	Q3U4U6;P80318;E9Q133;Q3U0I3;F6Q609	Q8CD26;A4FUQ6							Q9QZH6;J3KMM6	Q9WVA4	Q9D8U3	H3BL26;Q99L96;Q3TV84;O70401					Q0VBU4;Q9D024-2;Q9D024;F7C265;Q9D024-3
	Q7TND9;P53395	N0E4C0;P67871;N0E4C5;G3UXG7;G3UZJ5;N0E463;G3UXU2			Q99L69;Q3U3J1;P50136				Q3SXD3	A2A547;Q5I0T8;P84099					B1AU76;B1AU75;Q99MD9-2;Q99MD9	Q8R2Y2;Q8R2Y2-2	Q9CY93;Q5M9K9;P62900	Q4VBD2							A2AER7;Q91VJ5;A2AER8	F7DEU6;P50096;E0CYE2	Q3TVI6;Q3TGG0;Q8K3G9;Q3TB15;Q3U3Y3	Q8R1B4;Q66JU1							P50396	Q4FJU3;Q9DCT8	F6ZDS4	G5E829;Q8K314					Q3U3S0;P58404-2;P58404
	O55201;O55201-2	Q8BNH4;Q3UHC4;Q3UFZ8;Q80U27;Q61771			Q6P1J1;Q3TXY0;P97427;Q3TY94				Q3U3S0;P58404-2;P58404	Q9DCJ1					Q921W4;D3YZD6;D3Z6I4;Q921W4-2;D3YU21;F7BGV1	P70158	Q9D104;G5E8T3;Q9CRF7;Q8BZ07;Q9D7A6	Q99KV1							Q8QZV7;F6W761	Q3TVI6;Q3TGG0;Q8K3G9;Q3TB15;Q3U3Y3	Q9Z2X1;Q9Z2X1-2;J3QM80;J3QMT0	Q9D3B1							G3X8Q0;O89090;A2TH11;O89090-2	Q9D8U3	Q9WVA4	Q9Z2P7;Q91XH6;O88384;Q3TUP8					Q3UK39;Q3UJN1;P97310
	Q9R1K9;Z4YJH1;B1AUQ7	Q80X50;Q80X50-5;Q80X50-4;Q80X50-3;Q812D5			Q7TMM9				Q8C052;B2RWW1	Q8K3H0					Q61598;Q3UUX9;Q3UC72;Q3UPA3;Q3TIY6;Q61598-2	Q3UD03;Q3U199;Q3TCV9;Q6NSR8;F6T2H5;Q3UMV8;Q6ZPF7	Q3TZ17;O70400;S4R1V0	Q3U0J1;B9EJX8;Q9D0W5							Q3UBU9;Q62446	Q6P1J1;Q3TXY0;P97427;Q3TY94	Q52L87;P68373;Q3TIZ0	Q8CI51;Q8CI51-2							Q3UZZ6;Q8BT67	Q8C2D2;P70362;Q9CWQ7;Q9CZJ3	Q921W2;Q545C1;P70318;D6RGU1	Q8C9S4					A0AUN0;Q4G0C0;G3X928
	A2AER7;Q91VJ5;A2AER8	G3UYV7;Q059I1;P62858			P62862;Q642K5;Q3THB2;Q920W8;Q91V99				Q9D0M5;D6RIN4	E9Q8I9;E9Q8I9-2					G3XA13;Q99NH2;B2RUK1;B7ZNY3;F6S7Z1;A5D6P2;Q99NH2-2;E0CXR8;E0CZE2;E0CZ83;E0CXL4;Q99NH2-4;Q8BPQ6;Q8BPQ4;E9PYJ2;F6TSJ9;Q99NH2-3;E0CX45;E0CY24;Q99NH2-5;F6UGU7	P27773;F6Q404	Q99KN2	Q60936;F7B1B6;Q60936-2							Q60973;A2AFI9;A2AFJ1;Q3UJI2;Q3UX53;Q8C5H3	Q3U4U6;P80318;E9Q133;Q3U0I3;F6Q609	Q3TVW1;Q8R1X6;D3Z3F8;Q8R1X6-2	Q7TPX2;Q3UN31;Q3U613;P97819-2;P97819							Q542X7;P80314;Q9JJD8	Q5BLK1;P62754;Q8BT09;Q3TL53	Q545N8;Q9Z2M7;Q9D1M5;Q9DCE3;Q9CZE9	Q8CCJ3;Q8CCJ3-1					Z4YJY0;Q3TCJ1;D3Z4D8
	Q9CR70;J3JS94	Q8BTJ0;Q059T9;Q9DAW6;Q80WA7			Q9JIA1				Q8R0M2;Q3U548;Q91ZJ5-2;Q91ZJ5	Q3ULW0;P62827;Q14AA6					P48678;P48678-2;P48678-3	Q8VDN4;D3YUR9;D6RJ58	Q3UN48	D3Z780;Q61749;Q61749-2							Q6PIP5	Q3TVW1;Q8R1X6;D3Z3F8;Q8R1X6-2	Q6XLQ8;Q3TL33	Q3TA69;E9Q912;E9Q6Q4;Q3TU36;Q3TPS9;Q8BKH0							Q8BGT8;F7D3N3;Q8BGT8-2;F6U6Z2	Q1HL32;Q9CW03;Q6P5E5;Q6PIE1;Q6PFZ4;Q3UNU2	Q1HL32;Q9CW03;Q6P5E5;Q6PIE1;Q6PFZ4;Q3UNU2	Q542V3;Q8VE97;Q8K3A8;A2A837					D3Z5M2;Q99LF8
	Q8R404	Q7TND9;P53395			Q8BM84;P70372;Q8BVF8;Q8BTQ1;Q3UFF9				G5E8N7;Q9JLV6;Q3T9F5;E9Q9A5;Q9JLV6-2	P08030					I7HLV2;Q3THJ6;Q6ZWV3;P86048	Q3U7P4;Q3TM10;Q6PGH2;Q3TJZ7;Q8BW07	Q545N8;Q9Z2M7;Q9D1M5;Q9DCE3;Q9CZE9	Q99LG2;Q3U316;E9PV58;Q3U1S0							Q1HL32;Q9CW03;Q6P5E5;Q6PIE1;Q6PFZ4;Q3UNU2	Q9D8U3	P70670;Q60817;Q3UK68	Q3TVJ8;Q9D8L3;Q62186;Q9D6F7							Q8K0D5	Q6XLQ8;Q3TL33	S4R2J9;Q3TLH4-5;Q3TLH4;S4R294	Q9CQB5					Q9CZX9
	O08583;O08583-2	Q9ER73;A2A414			Q8CCI5				Q9D0J4	Q9CS68;Q9WV84;Q9D0C5					P50429;B2RWQ7;P50429-2	Q3U965;P58137;Q8BZR4;G3UXJ8	Q3UD03;Q3U199;Q3TCV9;Q6NSR8	B1ATP7;Q3U0M8;Q80Y81-2;Q80Y81							Q3UBA6;P63017;Q3U9L2;Q3TEK2;Q504P4;Q3TRH3;Q3TQ13;Q3ULM1;Q3TH56;Q3TZJ3;Q3KQJ4;Q3UDS0;Q3TH04;Q3TB63;Q3UXU1	Q9Z2X1;Q9Z2X1-2;J3QM80;J3QMT0	Q6P1J1;Q3TXY0;P97427;Q3TY94	Q6ZPJ3							Q3V275;Q99N23	P0C028;P0C027	Q8C292;Q8C1V4;Q3TIV6;Q99MN1;Q8CFK5	Q497Z4;Q8BWR8					Q6PB44-2;Q6PB44
	G3X9L6;Q9DCX2;B1ASE2	Q8C476;Q543C2;Q99PM9			O35654;A8Y5G7				A2A547;Q5I0T8;P84099	O54941					A2AWN8;P59326;Q3TH60	Q3TUF3;O35887;Q3UG11;Q3TQD1;G3UWV3;G3UWR0;G3UY49;G3V004;G3UXA3;G3UXA8	Q9R0A0;Q9QX52	Q8R5C0;F7C846;D3Z3F4;P47802;D3YVW0;G3XA75;G3UYJ5;G3UXX9							Q3THQ5;Q60864	P70670;Q60817;Q3UK68	Q3TLE4;Q8BQ46;F6QCI0	Q9D8V0;Q9D8V0-3							P0C028;P0C027	F7BJK1;Q2TJI9	Q99NF7;Q5BKS2	A2A6A1;A0PJ58					P08003
	B7ZCU2;B7ZCU5;Q3TPY5;Q3TMI0;Q6AXD3;B7ZCU4;B7ZCU3;Q3TJR5;Q3TJ64;B7ZCU0;J3QNK8;Q8CBW3-5;Q8CBW3-2;Q8CBW3-4;Q8CBW3-3;Q8CBW3;Q3UAH6	Q8BIJ7			Q544Z3;Q99020;Q9D6G1;Q80XR6;Q3TMZ8;Q20BD0				Q8QZZ7;G3X9K8	Q3TS44;Q9R1P4					A0A087WQH8	Q9CY93;Q5M9K9;P62900;Q58DZ1	Q6XLQ8;Q3TL33	Q5NTY0;Q3TK61;P63037;B1AXY1;B1AXY0							Q3TVI6;Q3TGG0;Q8K3G9;Q3TB15;Q3U3Y3	Q9ERB0	Q9CW46	Q9CQW1							F8VQJ3;P02468	Q545N8;Q9Z2M7;Q9D1M5;Q9DCE3;Q9CZE9	F7BJK1;Q2TJI9	Q99KW9					P99027
	Q3UWX7;P10711;Q3UPE0;E9PYD5;P10711-2	Q99L41;Q3UPG1;Q3UBC6;P22907-2;P22907			Q8VC30;Q3UTZ4				Q6NXZ0;Q3UDD5	Q5HZY7;Q9CR51;Q3U7E0					Q9CZX8;Q5M9P3;D3YUT3;D3Z722;D3Z5R8;D3YUG3	A8CVP4;A8CVP1;Q4ZJB3;E9QP62;Q99JW4;Q9D7B2;Q91XD2	Q80UG5;A2A6U3;Q80UG5-3	P97449;Q3UP74;Q3TB69							Q3UMF0-3;B1AZ15;B1AZ14;Q3UMF0-4;Q3UMF0-2;Q3UMF0	O88712-2;O88712;O88712-3	Q80X54;Q91YJ2	S4R2L4;B7ZNU2;S4R265;A2RTL5;S4R1M5							Q9D8U3	S4R2J9;Q3TLH4-5;Q3TLH4;S4R294	P0C028;P0C027	Q8VCT3;E9PYF1;Q8BMH2					H3BKT0;H3BJN3;Q6AXG1;Q9JJB6;H3BJ26;H3BLJ7
	Q8CAQ1;G3X9Q0;Q9JKP5;Q8CHF5	Q9D0M5;D6RIN4			Q3TDX2;Q8VEJ9				P54071	Q3U6L3;Q9QUH0;Q9D6F8					Q3U4Y0;P10922;Q8C1Y3	Q9D7E3	Q64727	Q8BLF1							F7BJK1;Q2TJI9	Q3TQR3;P59325;Q3TKY2;Q8BVV6;Q05CM5;Q05CH7;Q3TT65;Q6PHA6;Q05C65	Q9ERB0	Q505D7							Q6ZWZ2	Q8C292;Q8C1V4;Q3TIV6;Q99MN1;Q8CFK5	Q4FJU3;Q9DCT8	Q9DBJ3					Q810V0;Q9D7V6;A0PJ89
	P56135;F8WHP8	A1L3S7;Q8VHR5;Q8VHR5-2;Q69ZQ5			O54941				Q3TQI7	Q78ZM0;O70492;D3Z789;Q9CU14;Q9CSC2;D3Z6Z0					E9Q4D5;Q8VEL9;Q8VEL9-2	A8C1T7;Q91XD7	Q9JMA1;E9PYI8;Q80UN0;Q3TC32	A2AFS3							Q8VDS4	B2RUC7;Q9Z1Z2	Q3TQR3;P59325;Q3TKY2;Q8BVV6;Q05CM5;Q05CH7;Q3TT65;Q6PHA6;Q05C65	O55029							Q3TVP0;P17095-1	Q99NF7;Q5BKS2	Q6XLQ8;Q3TL33	Q3UQL2;O88543;Q8BX58					Q8BZE3;F6QU68;D3Z069;Q8K1N2;Q8K1N2-2;D3Z1R8
	B2ZRS3;Q570Y9;B2ZRS8;B2ZRS7;B2ZRS6;B2ZRS5;Q570Y9-2;Q570Y9-3	O55201;O55201-2			P52480				Q3UNI8;O35215;G3UZN1	Q3UJ34;Q3UEJ7;P16460;J3QNG0					Q9CS42	Q497N1;P62855	Q8CE96;Q8CE96-3	Q0VGN4							P60879-2	Q5NC81;P15532;Q5NC80	O35295	Q0PD66;Q9D1G1							Q5F2E7;Q5F2E7-2	F8VQJ3;P02468	F8VQJ3;P02468	Q810V0;Q9D7V6;A0PJ89					E9PVD1
	B2M1R6;P61979-3;Q3U9Q3;Q3U6X2;H3BKD0;D3Z5X4;H3BKI8	P70399;P70399-3			Q7TNG5;E9QK48;Q7TNG5-2;D3YWS2;D6RGM3				Q14C24;Q9D883;G3UW94	Q9R1K9;Z4YJH1;B1AUQ7					D3Z0F5;Q3UIT2;O88545	P14152;B1ATQ3	Q9D8S3	D4AFX6;Q6ZQK5;Q6ZQK5-2							Q8BXK9;Q9CYD1	A2AT37	Q545N8;Q9Z2M7;Q9D1M5;Q9DCE3;Q9CZE9	Q6P5E4							F7DEU6;P50096;E0CYE2	P68369	Q91YS7;Q63932;Q3UPM3;M0QWN2	Q99LD9;Q8BK57;D3Z487;D3Z7J6					Z4YJR1;Q3U3R4-2;Q3U3R4;Q3U3R4-3
	Q8VDS4	Q3UWX7;P10711;Q3UPE0;E9PYD5;P10711-2			Q3U7P4;Q3TM10;Q6PGH2;Q3TJZ7				Q9JHI7;B2RY30;D6RGB5	Q9JMH6-2;Q9JMH6					Q3UPL0;Q3UPL0-2	Q3UN48	Q3UK39;Q3UJN1;P97310	Q8BML9;Q8BU21;Q3TN94;D3Z158;Q3TIN2;Q8R1V9							Q3UGK7;Q3UQ99;Q7TPN5;Q3TXX8;Q91YD9	Q8C0C7;E9PWY9;Q8BJG2;Q8BXN0;Q4FJQ2	B2RUC7;Q9Z1Z2	B2RXR2;Q8VD65;B2RY05							Q9D0J2;Q4FK74;Q9D3D9;Q9DCZ0	Q9JMA1;E9PYI8;Q80UN0;Q3TC32	P68369	Q0VGU4					E9PXX7;Q3TEE8;Q91W90;Q3UBW8;Q3UWX1
	Q99L41;Q3UPG1;Q3UBC6;P22907-2;P22907	Q8CBE6;Q8BPJ7;Q544G5;Q62165;D9IFT4			Q3UZ63;Q3UL31;Q6NZF1;Q3TIV2				D3Z596;D3YWU5;D3Z595	Q9EQ20;Q8K0L1					P47963;Q5RKP3	Q9JLJ1	Q5FWB6;E9Q070;D3YVM5	Q9R0Q6							Q8C2Q8;Q9D9D7;Q3UD06;Q91VR2;A2AKU9;Q9ERA8;A2AKV2;A2AKV3;A2AKV1	F7BJK1;Q2TJI9	B9EHZ5;Q9JLB0-2;Q3UN60;Q9JLB0;Q6NSS8;Q811G2	Q540I4;Q3TJS0;O08917;G3UYU4							Q5SWJ8;P60060;G3UWH0	P97855;Q571F9;Q3UR88	Q14AQ1;P62334;Q8QZS9	Q8BGC0					Q99KK2;Q99KK2-2
	Q8BTJ0;Q059T9;Q9DAW6;Q80WA7	Q3ULW0;P62827;Q14AA6			P08030				Q9R0P3;H3BLJ9;H3BJL6;H3BKH6;H3BJP2;H3BK43	Q3ULH5;Q3TXW2;Q3TVV6;Q8VEK3;O88568;G3XA10;Q3TWN5;Q3TGN5;Q3TS50					Q9QXT0	Q9R0A0;Q9QX52;D6RH82	Q4FJU3;Q9DCT8	Q4TVN0;Q9CXF4;Q7TPU5							Q9WV98	B9EHZ5;Q9JLB0-2;Q3UN60;Q9JLB0;Q6NSS8;Q811G2	Q99JB2;A2AG39;F6WI02	F8WGX5;Q6PNC0							A2BGI8;Q4G0C5;Q3UWH9;Q9D868-2;Q3UY37;Q9D868;A2BGI9	Q8QZV7;F6W761	P97855;Q571F9;Q3UR88	Q3TLE4;Q8BQ46;F6QCI0					Q3TEB9;Q6NX62;Q6PCW8;Q546F8;Q571G2;Q9D753;F6SGT4;D3YYN3
	Q6ZQ47;Q3UYC8;A2BDX0;Q5BL11;Q5RKY4;Q9Z103	Q921W4;D3YZD6;D3Z6I4;Q921W4-2;D3YU21;F7BGV1			P59266				Q8VDC3;P28271	Q3UBP6;Q3UBQ4					Q3TJD7	P62196;Q99KR1;Q8K1K2	Q5BLJ7;P62301;Q921R2	Q6P5F9							E9Q1G8;Q8C2A3;E9Q9F5;O55131;Q3UNN1;Q5DTS3	P70158	A2AEB4;A2AEB3;Q3TME1;Q3TXN7;Q9R0Q4;A2AEB5;Q3U6G8	Q91WM3							Q3TAH3;Q9CPP0	Q91YS7;Q63932;Q3UPM3;M0QWN2	Q9ERT9	Q8BY87-2;Q8BY87					Q3V0K9
	P42669;Q8C6E9	Q9Z0U1			Q99KG3-2				Q6ZWZ6;P63323	Q545I7;P01325					Q9DBE7;A2A5S3;Q3TWP5;Q641P2;Q3TJ07;Q3UTC8;Q3TU43;Q3TWA1;Q3UKX3;A2A5R8;Q3U8D3;Q9Z108;V9GX87;Q3U7A6;Q6TNG5	Q5FWB6;E9Q070;D3YVM5	Q91WM3	Q9ERG0;Q8C7S2;Q8CD09;Q9ERG0-2;Q8C3R7;Q8BT15							Q8R2K1;D3YWS7;F6SJM7;Q8R2K1-2;Q8R2K1-3;Q8R2K1-5;Q8R2K1-4;F6X9P4	O35295	Q5NC81;P15532;Q5NC80	Q8BH80;Q9QY76;Q3TU78;Q3TA54							Q5FW97;P17182	Q5EAT0;P49962;Q3UIK3;D3YZX8	Q9Z2I8;C6EQH3;Q9Z2I8-2	Q8BSN6;O70480					Q14CH7
	Q8BFR5;D3YVN7;Q8BFR5-2	Q6GTL7;B2Z892;A0A087WRG0;A0A087WRM7;P70265			A0A087WRE5;Q6P3D0				Q3TF14;P50247;Q3U4D1;Q5M9P0;Q3U5U5;Q8BPI7	Q03517					Q8R016	Q6ZWZ6;P63323	Q3THH1;Q922R8	Q9JKF1							Q4FJU3;Q9DCT8	Q80X54;Q91YJ2	A2AT37	P68368							S4R2J9;Q3TLH4-5;Q3TLH4;S4R294	Q9ERT9	Q8R404	Q6WVG3;Q69ZA6					Q99MZ3;Q99MZ3-4;Q99MZ3-3;H9U1Q1;Q99MZ3-5;Q99MZ3-2
	P70399;P70399-3	Q60749			Q9Z2H7				Q3TDD8;Q3TSY9;Q8BGD9;Q3UGC0;Q3THB0;Q922K6;B2RWE8	Q80XK7;Q9D2N9					Q5BLJ7;P62301;Q921R2	Q3UE92;Q3UKF5;S4R1I3;Q6P1B1;Q3TL27;Q8VDK8;Q8BKH1;S4R228	Q04447	D3Z2U7;F6U9F5;F6Q346;F6W4F5;E9PWV9;D3Z7M6;F6QKL8;P27699-10;P27699-2;P27699-8;P27699-7;P27699-6;P27699-5;D3Z7P7;D3Z326;Q78Z98;F6VJ22;D3Z6A5;F6QWT6;P27699-11							Q541E2;Q3TWM2;P51855;Q8R436	P0C028;P0C027	Q8C0C7;E9PWY9;Q8BJG2;Q8BXN0;Q4FJQ2	Q4FK38;Q3UDJ2;Q8R0X7;Q69ZN1;D6REF7							Q3UK33;O08908;F7CB91	Q9CYA0	Q9CYA0	E9QKE4;Q8BMG7					Q3UW53;E9PYV4;Q3TDH5
	Q8BIJ7	Q76MZ3;Q8C2E1;Q7TMX2			Q9R1Q8;Q9D6K2				Q4VAA9;Q8BP48;Q8R0B2	Q9CWE0;D3YW54;D6RCX5;D3Z0X8					Q9CR70;J3JS94	Q04447	Q66JR8	Q99PB4;Q9ER67;Q3TFU3;A2AG46;A2AG48							Q91WQ3	Q9CW46	F7BJK1;Q2TJI9	Q6A0A9							Q60759;Q8BVD4	Q9Z2Q6;B7ZNM7;Q52KH2	Q5EAT0;P49962;Q3UIK3;D3YZX8	G5E870;A0A087WNZ7					D3Z7V3;H7BX64;Q3URD3-2;Q3URD3;F8WIH0;F6UV57;F6YCM8;Q3URD3-5
	P42125;Q9DBN7	O08583;O08583-2			Q99J57;Q3THS6;Q3TSS0;Q3UZA2;Q3TED1;Q3UAP7;Q6PE05				Q9D967	E9Q8K8;Q6ZPZ3-2;Q6ZPZ3;Q6PAI8					Q61249	Q5M9N8;Q3UBI6;P14148;Q3TK73;F6XI62	O09131	Q9CQK7							Q8BJW6;Q8BJW6-2	Q545N8;Q9Z2M7;Q9D1M5;Q9DCE3;Q9CZE9	O88712-2;O88712;O88712-3	Q3U1V3;Q99MK8;Q7TS64;E9PW16							Q2M4J2;Q9Z1B3-2;Q9Z1B3-3;Q9Z1B3;Q6ZQ92;Q3UPW0	Q9Z2I8;C6EQH3;Q9Z2I8-2	A7YY80;D0VYV7;B6ZHD1;V6BQR3;Q8BGK4	Q6A0A9					A2AQA9;A2AQB2
	Q6GTL7;B2Z892;A0A087WRG0;A0A087WRM7;P70265	G3X9L6;Q9DCX2;B1ASE2			B2RXY7;P48758				P62996;F8WJG3;Q5PR75	Q922F6					Q8C1B7-3;Q8C1B7-2;Q8C1B7	Q64727	Q5XJY5;Q3U4S9;Q8R1S6;Q3TDU1;Q8C0G7	O89079;D3Z315;F6YFR7							P70670;Q60817;Q3UK68	A6H663;Q9JLV1;Q3TAM9	Q8R404	P63094;Q6R0H7;P63094-3							P57759	Q14AQ1;P62334;Q8QZS9	Q8VEH8;Q9CWA6	Q3UMB9					B2RTB0;Q3UHX2;Q1WWJ8
	Q9D6T0-2;Q9D6T0	Q8BWR2;B1AV57;Q8BWR2-2			B2RRH9;Q3THK7				O88291;D3YXQ7	J3KMT7;Q08122-4;E0CXS2;E0CY14;F8WIE2;E0CXS9;Q80TC1;Q08122-2;Q08122-1;Q08122;F6TS96;Q3TY99;E0CXU1					P31750;Q8BS26;D3Z783;D3YXX3	Q80XL6;D3YTQ5;Q7TNH5;F6U473	Q9EPJ9;Q3TGS9;Q05DE0;V9GXM1;Q9EPJ9-2;V9GWV1;Q6PB94;Q05BC5	Q0D2K7;Q8CF96;Q8CF95;E9PZA8;Q9R0N7							Q3UVN5;Q9CZ44;Q9CZ44-3;Q3KQQ1;A2AT02;Q9CZ44-2	A2AEB4;A2AEB3;Q3TME1;Q3TXN7;Q9R0Q4;A2AEB5;Q3U6G8	A6H663;Q9JLV1;Q3TAM9	P60766;Q3UL78							Q9D881;P19536	A7YY80;D0VYV7;B6ZHD1;V6BQR3;Q8BGK4	Q5M9L7;Q8BT90;P63276;Q3TK12	Q4ACU6;Q4ACU6-2;Q4ACU6-3					Q3UQB4;A2BFB1;Q8K0H8;A2BFB0;O08609-3;O08609;A2BFB2;O08609-2
	Q8BWR2;B1AV57;Q8BWR2-2	Q8CAQ1;G3X9Q0;Q9JKP5;Q8CHF5			E9Q509;Q3UEI4;G3X925;Q3UEH4;P53657;A7MCU9				Q3UJB0;Q3UAI4;Q80W39;Q3UBH2;Q3UQU5;Q8BL33	Q3TQI7					Q561N5;F6YVP7;P62270;S4R1N6;Q3TW65	Q3TJ01;Q99LF4	G5E8R1;G5E8R0;E9Q455	Q91ZE0							Q9R0P4;D6RI64	Q99JB2;A2AG39;F6WI02	P0C028;P0C027	D3YW48;O88456							P21619	Q8VEH8;Q9CWA6	Q9Z2Q6;B7ZNM7;Q52KH2	D3Z7R9;Q640L3;Q640L3-2;Q640L3-3					Q3TK27;Q8CI11;Q8CI11-2
	B7ZWM8;B2RXP1;E9QAU9;Q8BVU0	Q542Y0;Q64669;Q99KL8			Q3ULH5;Q3TXW2;Q3TVV6;Q8VEK3;O88568;G3XA10;Q3TWN5;Q3TGN5;Q3TS50				Q9WV96;D6RG99;D3YVK5;D3YVK4	P70460					P61458	P28651	S4R1P5;Q91ZU6-4;E9Q9X1;Q91ZU6;Q91ZU6-3;A0A087WSP0;Q91ZU6-2	Q542A1;Q61334							P48722;P48722-2;E0CY23	Q61206;Q8BTA2	Q8C2D2;P70362;Q9CWQ7;Q9CZJ3	Q9JL35							Q1HL32;Q9CW03;Q6P5E5;Q6PIE1;Q6PFZ4;Q3UNU2	Q5SUR0	O35295	P63168;Q9D6F6					E9PZ87;Q8BJG6
	Q76MZ3;Q8C2E1;Q7TMX2	P11031			Q8R1Q3				P10853;A0JLV3;B2RVD5;Q8CBB6;Q921L4;Q8CGP1;Q8CGP2;Q8CGP2-2;A0JNS9;P70696	Q8CFZ2;Q62030;E9Q4D0;F6XJP7;H3BJL4					P31230;Q3UZG4;Q8C2U7	E0CYJ0;E0CXA9;Q3UGM5;Q6PEB6;G8JL35	Q8BNU0;Q8BNU0-2	Q8BMK4							Q91V55;P97461;D3YYM6	P24529;Q3UTB3;E9Q9G5	Q61177;Q60737;Q9D0E8;Q8CD20	Q80U56							O88845;Q3TR91;O88845-3	Q8R404	Q9JMA1;E9PYI8;Q80UN0;Q3TC32	G5E8R4;Q922D4-2;Q922D4;Q922D4-3;Q922D4-4					Q8CCP0;Q8CCP0-2;Q8CCP0-3
	D3Z4U0;B2RRT9;D3Z4T9;Q9R020;E9PUD0	Q3TDX2;Q8VEJ9			Q9JLI6;Q9JLI6-2				Q8BTS0;Q61656;Q5U222;Q3V0Z8;A1L333;Q3UXW3;S4R1I6	Q3TGH8;O88811;O88811-2					P70158	Q8K0C9;J3QMC6	Q9CXW4;E9PYL9;Q8VC94;A2BH06	A0A068BGT0;Q8C754;G3UY33;Q3V3A4;Q8C754-2							Q9R0H0-2;Q9R0H0;A2A848;Q8C168;Q8BW35	Q8R404	P24529;Q3UTB3;E9Q9G5	Q3B7Z2;Q3B7Z2-2							Q5D098;P70195	Q58DZ3;P62889;Q497D7;Q5PR15	P21619	Q6P1F1;E9Q6B6;E9Q6E0;Q8CHB5;Q6NV54;Q3UHB5;J3QNR6;K3W4S4;Q9ESN9-2;Q9ESN9-3;Q9ESN9-5;Q9ESN9-4;Q9ESN9;Q9ESN9-6					Q8C2D1
	Q3TN93;Q3T992;Q8R317-2;Q8R317;Q66K07	B2ZRS3;Q570Y9;B2ZRS8;B2ZRS7;B2ZRS6;B2ZRS5;Q570Y9-2;Q570Y9-3			Q9JJV2-3;Q9JJV2;D3YWS3;Q9JJV2-2				Q8C5B4	Q542X7;P80314;Q9JJD8					P60879-2	Q58E70;P21107-2;D3Z2H9	Q6ZWZ4;Q5M9L1;P47964	P54823							Q5FW97;P17182	Q2M4J2;Q9Z1B3-2;Q9Z1B3-3;Q9Z1B3;Q6ZQ92;Q3UPW0	Q61206;Q8BTA2	Q9Z0S9;Q62145							Q3TKY6	P21619	Q8QZV7;F6W761	Q8VCQ3;E0CZ57					Q9JLJ1
	Q99LC5	Q99L69;Q3U3J1;P50136			Q3U7Z6;Q9DBJ1;Q6NWV5				Q9JIA1	Q9D0T1;E9PZS4					D3YZP9	Q542H2;Q9Z2U0;Q3UIT9;Q3TN31;Q3THL2;Q9CWH6;B7ZMS4;B7ZMS3;Q8VEB8	Q52L55;Q9QYC3	Q8BGS2;Q8BGS2-2							Q91VE6-2;Q91VE6	Q8C4Q6;Q8C4Q6-2	O08749;Q3TIE8	Q3UBX0;D3Z7P2;D3Z3Z2;D3YX08;D3Z0I8							Q9JJV2-3;Q9JJV2;D3YWS3;Q9JJV2-2	Q5M9L7;Q8BT90;P63276;Q3TK12	E9Q3M3;Q6NZM3;O08788;O08788-2	Q69ZP5;Q4FK22;Q9DC16					E9QQ99;D3Z1Y1;Q9DBY1;D3YZH4;Q9DBY1-2
	Q60749	E9Q4M4;Q91VN4;Q9DA45;Q3TJS8;Q8C2Z6			S4R248;S4R221;Q8C0D4;S4R203;B2RUJ8;S4R2V0;S4R1B0				Q922F6	Q3U9X2;Q9ES84;O35901;O35900;Q9EP83					Q7TQH0-2;Q7TQH0-3;Q7TQH0;Q3TGG2;E9Q5Q0;Q3TYH7	Q9CXW4;E9PYL9;Q8VC94;A2BH06	O55222	Q6PAR5-5;Q6PAR5-2;Q6PAR5-6;Q6PAR5;Q6PAR5-4;F7ADQ2							P70158	Q545X8;P62702;Q3UXQ6;Q545F8	Q2M4J2;Q9Z1B3-2;Q9Z1B3-3;Q9Z1B3;Q6ZQ92;Q3UPW0	P21614							Q5F258;Q68FF6	O35295	Q5SUR0	Q8BQV7;Q6ZWX1;O55142;Q9DC85					Q3TZ63;Q8R3D1
	Q3TDX2;Q8VEJ9	Q3TV90;Q9CYI4;Q05D11;D3Z765;Q9CYI4-2			Q8BTX9				Q3TT94;Q6P1F6;Q571J7;Q3TPC5;Q9CWU3	Q3TZ17;O70400;S4R1V0					Q3TDD8;Q3TSY9;Q8BGD9;Q3UGC0;Q3THB0;Q922K6;B2RWE8	Q3TYL7;Q3TU79;Q3TIT6;Q9QYJ3	Q497N1;P62855	Q8CE96;Q8CE96-3							Q99KD6;Q3UDK5;E9PZS8;Q61387;Q3U7R2	Q61177;Q60737;Q9D0E8;Q8CD20	Q9CQZ1	B1AVZ0							E9Q3M3;Q6NZM3;O08788;O08788-2	Q3V275;Q99N23	Q3V275;Q99N23	Q61025;Z4YJL9;Q61025-2					A0A087WQS0;A0A087WQM0;E9Q0S6;A0A087WRU0;A0A087WQ94;Q3U0Q9;Q7TSV1
	Q9JLI6;Q9JLI6-2	B7ZCU2;B7ZCU5;Q3TPY5;Q3TMI0;Q6AXD3;B7ZCU4;B7ZCU3;Q3TJR5;Q3TJ64;B7ZCU0;J3QNK8;Q8CBW3-5;Q8CBW3-2;Q8CBW3-4;Q8CBW3-3;Q8CBW3;Q3UAH6			Q3TUQ5;O35691;Q9CV89				H3BJ30;H3BJW3;Q6NVF9	Q58EV5;P63158;Q8C7C4;Q8BNM0;Q6P202;Q497Z6;Q8BQ02;Q3UBK2;Q3UJK0;D3YZ18					Q5EBI8;Q06185	Q9R0H0-2;Q9R0H0;A2A848;Q8C168;Q8BW35	I7HLV2;Q3THJ6;Q6ZWV3;P86048	Q9CY58;Q3UJK2;Q9CY58-2;Q3UMP4;Q3UEI6;Q9CY58-3;Q3V274;Q9CY58-4							Q8C2D1	Q9JMA1;E9PYI8;Q80UN0;Q3TC32	P70158	P08003							A2ALF0;A2ALF2;Q6NZB0;A2ALF3;F6TQL3	Q9D1P4	Q9D104;G5E8T3;Q9CRF7;Q8BZ07;Q9D7A6	P26645;Q05BL6					Q3TV94;Q52PE3;Q9CY50
	Q99L69;Q3U3J1;P50136	O88587-2;O88587			P05063				Q542I7;Q3TX23;O88653	Q9JLI6;Q9JLI6-2					Q6PIU9	Q5M9N5;Q5M9J8;P41105;F6Z0X0	Q4FK49;Q9D819;Q8BTY3;Q3UA53	B2RSU7;E9PWI6;Q8CHG3;E0CYI9							P57759	Q8BK29;B1AT82;Q9D0M1;B1AT83	Q9D104;G5E8T3;Q9CRF7;Q8BZ07;Q9D7A6	Q3UG16;P35585							Q921W2;Q545C1;P70318;D6RGU1	Q9CXI0	Q9EQ80;Q3V2R8;D3Z0G0;Q8C608;Q5FWC8	F8WIE5;Q69ZR2					G3UXA6;G8JL74;Q8BHD7-2;G3UZ01
	Q9Z0U1	Q9D6T0-2;Q9D6T0			P97930;Q6GRA7;P97930-2				Q58E59;Q9D554	Q3TST0;Q8K1R3;Q3UNL5;Q3TN29;Q8K1R3-2					Q58EU1;Q8BWU5;Q3UQ67;E9QMF4;E0CYN9	Q99KN2	Q9JLJ1	Q9D1M7							Q9DBP5	Q8C2D2;P70362;Q9CWQ7;Q9CZJ3	P62918;Q3UJS0;Q3THC7;Q9Z237	Q3U4F0;Q91V61-2;Q91V61							Q1WIL9;E9PYN1;Q8R5M8-4;Q8R5M8-3;Q8R5M8-2;Q8R5M8;Q8R5M8-7;Q8R5M8-6;E0CY16;Q8R5M8-5;Q9QYL3;Q9QYL4	Q9QZE7;Q3TXK6	Q9QZE7;Q3TXK6	Q8BGS2;Q8BGS2-2					Q8VEH8;Q9CWA6
	Q3TJ91;J3QJU5	Q9CR70;J3JS94			Q8CCK0;Q8BP16;A0PJB8				A2AJ72;Q3TIX6;Q3ULP9	M4TKR7;P15208					P50516;P50516-2	E9QN52;Q91WK0-2;Q91WK0	Q3TGU7;P50580;Q05BN2;Q3UMW2;D3YVH7	Q3UK41;Q8BG30							P09411;S4R2M7	Q9CQZ1	Q5M9L7;Q8BT90;P63276;Q3TK12	A2RS22;Q9WUM3							Q8BP79;P53702;G3UXK7	E9Q3M3;Q6NZM3;O08788;O08788-2	Q58DZ3;P62889;Q497D7;Q5PR15	B2RXR6;E9QNQ2;J3QK13					E9QQ10
	A1L3S7;Q8VHR5;Q8VHR5-2;Q69ZQ5	D3YZN4;Q7TNG0;D3Z1Z1;B2RQY8;Q3ULF4;D3YXB7;F6W695			Q5SUR0				Q561N5;F6YVP7;P62270;S4R1N6;Q3TW65	Q9DC36;Q8CDE0;Q5SS83;Q3UEG9;Q60634-3;Q60634-2;Q60634					Q8BN32;P29341;Q3U8U8;Q99KL3	Q99J77;Q9JJH0;Q3TFB5	Q542H2;Q9Z2U0;Q3UIT9;Q3TN31;Q3THL2	Q6P289;Q571M5;Q8C863;Q8C863-2							B2CY77;P14206	P62918;Q3UJS0;Q3THC7;Q9Z237	Q545X8;P62702;Q3UXQ6;Q545F8	P46460							Q99NF7;Q5BKS2	Q9R0P4;D6RI64	Q3UPL0;Q3UPL0-2	Q91WE4					Q6ZWZ7;Q9CPR4;Q505B1;Q80V08;Q6PHZ1
	G3UY42;Q8CCS6-2;Q8CCS6;D3YUB9;D3Z5F7;D3Z055;G3UWS5	P57784			Q922D8;Q3TW74;Q3UZH3;Q8BXX7				D3YZZ5;E9Q7G1	Q3TJ01;Q99LF4					Q3TU85;Q61696;Q3TAI8	Q14CH7	Q14CH7	Q91W52;Q91W52-2							P46471;Q3UIH5;Q8BVQ9;Q3U5V3	O08749;Q3TIE8	Q8C4Q6;Q8C4Q6-2	E9Q3B9;D3YYS6;O35678;Q3UFX6;Q3UFN1							Q63918	Q545X8;P62702;Q3UXQ6;Q545F8	A2ASS6;E9Q8N1;E9Q8K5;A2ASS6-2	Q9D281					Q6GTY4;Q9Z2G6-2;J3QJX3;Q5DTL8;Q9Z2G6
	P11031	Q9CQQ8			Q3TFP0;Q3UDH7;Q3UA07;Q3UYX6;Q9R0U0-3;Q9R0U0-2;Q9R0U0				Q60I30;Q9D892;Q3U589	Q3TKQ3;Q8VBV3;A2AV19					P16254;A2AUM6	Q9D8S3	Q3UC02;Q9DB79;P62281;Q9D0P6	Q6A028							Q61249	Q5M9L7;Q8BT90;P63276;Q3TK12	Q8BK29;B1AT82;Q9D0M1;B1AT83	Q3U2X5;Q64133;Q3TPD9;Q3UJ53							D3Z5M2;Q99LF8	Q3UPL0;Q3UPL0-2	Q9D1P4	B9EJ24;Q9DBC0;A4FUU9					Q80XL6;D3YTQ5
	G3UYV7;Q059I1;P62858	Q8BFR5;D3YVN7;Q8BFR5-2			Q9D3M4;Q91V77;Q9JL08;P56565				Q8BIV6;G5E895;Q8CI22	Q9QZX7-2;Q9QZX7					Q3U741;Q501J6;Q3TU25;Q501J6-2	Q8VDS4	E9PXX7;Q3TEE8;Q91W90;Q3UBW8;Q3UWX1	G3X922;D4AFX7;Q3UX52;Q3UQJ7;Q8CHD7							E9PW20;Q9CY57-3;Q9CY57;B7ZMS6;Q2VPR3;Q9CY57-5;Q9CY57-4;Q9CY57-2;D3YZA1;D3Z7T7	Q3TU85;Q61696;Q3TAI8	Q3ULB1;Q921W7;P47226-2;P47226	Q3TXV1;Q3TKV1;Q8VDM4;Q3TW71;Q3TI61;Q3U9Y8;Q3TWL6;J3KMQ2							O08749;Q3TIE8	A2RRK3;O54988-2	Q545X8;P62702;Q3UXQ6;Q545F8	Q9CY93;Q5M9K9;P62900					I6L960;G3X9Y5;Q6A0C5;E9Q735
	Q542Y0;Q64669;Q99KL8	Q3TN93;Q3T992;Q8R317-2;Q8R317;Q66K07			Q9D2D1;Q544R6;G3X8T3;P16675				Q7TMK9-2;Q7TMK9;G3UZI2;G3V018;G3UZ48;G3UXJ6	Q9R1P0;Q3TL95;Q3UCF0;E9PW69					Q3U2G2;Q571M2;Q61316	G5E8R1;G5E8R0;E9Q455;S4R261	Q3TRK3;Q9QXS6-3;Q9QXS6;Q9QXS6-2	Q3TB79;Q8C2J1;Q80Y25;Q3UDG8;Q3TI07;O35350;Q3UF24							Q9CW46	Q3ULB1;Q921W7;P47226-2;P47226	Q8K009;D3Z6B9	E9QKT0;Q63943-2;Q921S6;Q63943;Q3URR2;E9Q5E0							Q9D7S9	S4R1F9;S4R249;Q8C8R3-2;S4R2H6;S4R2F3;S4R285;Q8C8R3;S4R2D0;Q8C8R3-5;S4R1J9;S4R2T7	S4R1F9;S4R249;Q8C8R3-2;S4R2H6;S4R2F3;S4R285;Q8C8R3;S4R2D0;Q8C8R3-5;S4R1J9;S4R2T7	A8C1T7;Q91XD7					Q3UHJ0;Q3UHJ0-2
	Q3TV90;Q9CYI4;Q05D11;D3Z765;Q9CYI4-2	P56135;F8WHP8			Q3TH57;Q8CGF7-2;Q8CGF7;Q8CGF7-3				P08030	Q545X8;P62702;Q3UXQ6;Q545F8					Q8R2K1;D3YWS7;F6SJM7;Q8R2K1-2;Q8R2K1-3;Q8R2K1-5;Q8R2K1-4;F6X9P4	Q642K1;Q58EW0;P35980;Q0QEW9;G3UZJ6;G3UZK4;G3UYV6;G3UX28	P97868-2;P97868	I7HPY1;I7HLV5;Q9D8T0;I7HJS7;J3JS95							E9QML5;Q61464-4;Q61464;E9QKZ7;Q61464-7;Q61464-2;Q61464-5;Q3TNM0;Q3TZK9;Q3TQM2;Q3TQ35	Q9D104;G5E8T3;Q9CRF7;Q8BZ07;Q9D7A6	P09411;S4R2M7	Q3UNI1;Q53Z05;Q923E4;A7MCT8;Q923E4-2							Q3U8E7;P18155	A2ASS6;E9Q8N1;E9Q8K5;A2ASS6-2	Q99JB2;A2AG39;F6WI02	F8WIC0;Q9D2H2					D3YUW7;E9QMC1
	Q9D7X8	Q9CQX2;Q3TN44;Q3TH64			Q9QZX7-2;Q9QZX7				Q9QZ83	Q60I30;Q9D892;Q3U589					Q9QUM9;E0CXB1	Q80UG5;A2A6U3;Q80UG5-3;Q80UG5-2;Q3TDR9;A2A6U5;A8Y5D3	Q7TPW6;Q9Z2Z6	Q9EPL8							Q60759;Q8BVD4	Q8K009;D3Z6B9	Q60973;A2AFI9;A2AFJ1;Q3UJI2;Q3UX53;Q8C5H3	Q3THH1;Q922R8							Q9D6F9	Q4FZE6;P62082;F6SVV1	Q6P6I7;A2AL12;Q5FB19;Q3UZG3;Q8BG05;Q5U3M2	K3W4R5;A2AGT5-3;A2AGT5;Z4YL78;A2AGT5-2;Q80U79					Q8BFQ8
	Q3UXQ1;Q05CG5;O55176;B1AXU3;B1AXU4;O55176-5;O55176-4;O55176-2	Q9R1C7-2;Q9R1C7			Q9DCJ1				B7ZP16;H7BWY3;Q3UEG6	Q542I7;Q3TX23;O88653					Q3UMF0-3;B1AZ15;B1AZ14;Q3UMF0-4;Q3UMF0-2;Q3UMF0	Q80TZ3;Q80TZ3-2;Q80TZ3-3;B1B0B8;B1B0B7	Q9JKV1;Q8VCI8;D3YUD8	Q3TUQ7;Q5EG47							Q9ER73;A2A414	P62077	Q3TU85;Q61696;Q3TAI8	Q8CJG0;Q8CGT9;Q6P239;Q8R3Q7;Q6PHA2							Q9Z2X1;Q9Z2X1-2;J3QM80;J3QMT0	Q6P6I7;A2AL12;Q5FB19;Q3UZG3;Q8BG05;Q5U3M2	Q4FZE6;P62082;F6SVV1	P21614					Q8VCH8;Q3UFS2;Q05C23
	Q542I7;Q3TX23;O88653	Q8BGR9			A2ACL9;Q62443;Q3UST4				Q80XU5;E9Q861;Q8BNT6	P46471;Q3UIH5;Q8BVQ9;Q3U5V3					Q3UM23;Q91VI7	Q9EPJ9;Q3TGS9;Q05DE0;V9GXM1;Q9EPJ9-2;V9GWV1;Q6PB94;Q05BC5	Q9D394-2	Q4PZA2-3;Q4PZA2-4;Q4PZA2;Q4PZA2-2							Q9CPQ1	Q60973;A2AFI9;A2AFJ1;Q3UJI2;Q3UX53;Q8C5H3	Q9JMA1;E9PYI8;Q80UN0;Q3TC32	Q6P5D3;Q6P5D3-4;Q6P5D3-2							Q3TPJ8;A2BFF7;A2BFF9;D6Q0F6;D6Q0F5;O88487;A2BFF8;D6Q0F7;A2BFF5;Q3UDA2	P30416;F6S2D5;D6RDE2	Q9CXI0	Q9D375;Q8R2Y0-2;Q8R2Y0					Q8VHC3
	Q8VE70;Q3TVB4;F8WI55	P42669;Q8C6E9			Q8R0M2;Q3U548;Q91ZJ5-2;Q91ZJ5				Q3TST0;Q8K1R3;Q3UNL5;Q3TN29;Q8K1R3-2	Q6ZWZ4;Q5M9L1;P47964					D3Z1F6;B9EK90;Q8VDU5	Q8BTX5;Q5M9L0;Q3TII2;Q91WK2;Q3THW7;Q3TIK5;Q8BMZ8	Q3UE92;Q3UKF5;S4R1I3;Q6P1B1;Q3TL27;Q8VDK8;Q8BKH1	P10852-2							P32020;P32020-2	P09411;S4R2M7	P62077	Q3UNN2;Q3U8S1;Q3U468;A2APM5;A2APM3;A2APM4;E9QKM8;Q80X37;A2APM1;A2APM2;P15379-2;P15379-3;P15379-6;P15379-11;P15379-5;P15379-10;P15379-9;P15379-4;P15379-8;P15379-7;P15379							Q3UMF0-3;B1AZ15;B1AZ14;Q3UMF0-4;Q3UMF0-2;Q3UMF0	Q9D104;G5E8T3;Q9CRF7;Q8BZ07;Q9D7A6	A2RRK3;O54988-2	Q9D5T0;Q9D9C1					Q8K2C7
	Q9ER73;A2A414	Q3UKJ7;Q3UKJ7-2			Q80XK7;Q9D2N9				Q9WV02;A2AFI3;Q9WV02-2;S4R1F6	Q8CAY6;G3XA25;Q80X81;F2Z459					Q4VAG4;P67984	Q9D7E4	Q6ZWX6	B6YY24;Q3UVG3							B7ZN44;A5CVE4;I1E4X8;B2RQE3;P83093;Q8BIM2;F6WBP9	Q9Z2Q6;B7ZNM7;Q52KH2	Q6P6I7;A2AL12;Q5FB19;Q3UZG3;Q8BG05;Q5U3M2	B2RSW8;Q9R0L6;Q9R0L6-2							Q8C650-2;Q8C650	Q9EQ80;Q3V2R8;D3Z0G0;Q8C608;Q5FWC8	Q9R0P4;D6RI64	Q80U44					A2RSB1;B7ZNL2;Q8C1W9;Q78ZA7
	Q9EQ80;Q3V2R8;D3Z0G0;Q8C608;Q5FWC8	Q542I7;Q3TX23;O88653			Q3UTI7;Q9QUR7				P57774	B1GX80;B1GX81;Q61036-2;Q61036;A3KGC5					Q542X7;P80314;Q9JJD8	Q4FJU3;Q9DCT8	Q9D7E4	Q64735-2;Q64735;Q62479							P97449;Q3UP74;Q3TB69	Q76MZ3;Q8C2E1;Q7TMX2	Q9Z2Q6;B7ZNM7;Q52KH2	Q69ZD1;O35382;Q8CA11;Q8C391;Q8CEG7;Q9CXE1							Q3UAT9;Q3U9N8;P24547;Q3UPJ2	Q99JB2;A2AG39;F6WI02	Q9CW46	Q9DBQ7;Q9DBQ7-3					Q9CQA1
	Q9CR68	Q6R2P8;Q1RLK4;Q1LZM6			Q9DBS5				Q8BH43;Q3T9Z7;Q80UQ8	Q9WTX2					Q91V47;Q3UK94;Q684Q9;P21126;B2M0S0;B2M0R9	Q6A028	Q3UW53;E9PYV4;Q3TDH5	O54774;Q3U237;Q3UR54;Q8CGH7;Q05CQ3							Q4FZE6;P62082;F6SVV1	Q3UE99;A2RTI3;O89017	Q76MZ3;Q8C2E1;Q7TMX2	A0A087WRF2;Q8BXK8							P46471;Q3UIH5;Q8BVQ9;Q3U5V3	Q76MZ3;Q8C2E1;Q7TMX2	F7DEU6;P50096;E0CYE2	Q9JMG2					O35226;Q9CY29;O35226-4
	Q9CQX2;Q3TN44;Q3TH64	Q8K239;Q9CZR8;Q3TA37;Q80UT3;Q8VDE3			Q78ZM0;O70492;D3Z789;Q9CU14;Q9CSC2;D3Z6Z0				Q545K4;Q3UBJ6;Q3UA13;Q3U818;Q3U740;O55135;Q9R071	Q4VBX4;Q9D2M8;A6X925;Q9D2M8-2					Q4FK11;Q3UM20;Q3TF40;Q99K48;Q3TTV7;Q3TFC2	Q9WUP7-2;Q9WUP7;A0A087WP81;A0A087WRL3	Q3U965;P58137;Q8BZR4	Q99LS5;E9Q137;Q3TXY2;Q9D7D9							Q64737;Q3UJP8;Q3TH49;Q64737-2	Q2TPA8;Q9D015;Q99JH2;B1AX78	Q2TPA8;Q9D015;Q99JH2;B1AX78	E9QLQ3;Q61409							Q2M2Q8;Q3TE41;Q920Q6-3;Q920Q6-2;Q920Q6;B1AT13;Q8CD63;Q32LZ4	A2RSB1;B7ZNL2;Q8C1W9;Q78ZA7	P30416;F6S2D5;D6RDE2	Q5SXR6;Q68FD5;Q80U89;Q3UPJ3					P61961;H7BWZ1;D3YW97
	Q9CQQ8	P48678;P48678-2;P48678-3			Q3U0F3;Q91VK4;A0A087WRM2				O09131	P50516;P50516-2					Q8BH95;F6T930	P60670;Q3UE06;Q3UDU9;P60670-2	Q3UE99;A2RTI3;O89017	Q6DFZ1;Q6A099							Q3UCC5;Q6P8I4;F8WI88;Q3TM89;Q3KQH9;D3YWA4	Q8C298;E9Q179;Q8C5Q4	Q3U0V1	Q8QZY1							Q9ER73;A2A414	Q6P1J1;Q3TXY0;P97427;Q3TY94	A2RSB1;B7ZNL2;Q8C1W9;Q78ZA7	A2AQL0;Q9Z1W9;G1JLS7;Q3V256					Q3UIA4;Q9JHW9
	Q03265;D3Z6F5	Q9D7X8			Q3TCW5;Q99J45;D3YUV1				Q9R1P0;Q3TL95;Q3UCF0;E9PW69	Q3UJR8;Q64152-2;Q64152					Q8K370;Q9CRH8	A2AWN8;P59326;Q3TH60;Q3U8D6;Q8BUI8	Q99KK2;Q99KK2-2	O55029							P34022;H7BX22;Q3U6M5	Q6P6I7;A2AL12;Q5FB19;Q3UZG3;Q8BG05;Q5U3M2	Q8CIN4	Q99KK2;Q99KK2-2							Q8R404	F7DEU6;P50096;E0CYE2	P97449;Q3UP74;Q3TB69	Q642K0;Q60605-2					Q8R332-2;Q6ZQC2;Q3UZQ6;Q8R332-4;Q8R332-3;Q8R332
	Q3UKJ7;Q3UKJ7-2	P42125;Q9DBN7			P68369				Q9CZL5	P80316					Q3UKT3;Q3TG75;P29758;Q3UJK5	O09131;D3Z1Q9;Q9D2J1;Q9D2S1;Q8BW12;Q8K2Q2	A2RS22;Q9WUM3	Q4KMM5;Q3TIZ8;Q91XA2;Q3UZG0							P17751;H7BXC3	Q4FJU3;Q9DCT8	O54941	Q6Q477;D1FNM9;Q32ME1;F7AAP4;D1FNM8;H2BL43;E9Q828							Q9CXI0	Q9CW46	P62918;Q3UJS0;Q3THC7;Q9Z237	Q99KR7					Q9EPJ9;Q3TGS9;Q05DE0;V9GXM1;Q9EPJ9-2;V9GWV1;Q6PB94;Q05BC5
	Z4YKB8;Q3TEA8-2;Q3TEA8;Z4YKA3;Q3TEA8-3;A2AM65	Q8CAJ7;Q3U3I6;Q3TVK3;Q9Z2W0;Q8BPW9			Q8CFZ2;Q62030;E9Q4D0;F6XJP7;H3BJL4				Q3UJR8;Q64152-2;Q64152	Q922D8;Q3TW74;Q3UZH3;Q8BXX7					Q9R0P3;H3BLJ9;H3BJL6;H3BKH6;H3BJP2;H3BK43	Q8CE96;Q8CE96-3;Q8CE96-4	Q69ZW3-2;Q69ZW3	Q3TXS7;Q8BU34;Q05CG9;Q8CGG2;Q8CGI9;Q5HZG6							A0A087WST2;Q8BX09-2;Q8BX09	Q8CIN4	Q80TZ3;Q80TZ3-2;Q80TZ3-3	D3Z7V3;H7BX64;Q3URD3-2;Q3URD3;F8WIH0;F6UV57;F6YCM8;Q3URD3-5							Q3UID0;Q6PDG5-2;Q6PDG5	Q3TVI6;Q3TGG0;Q8K3G9;Q3TB15;Q3U3Y3	Q6P1J1;Q3TXY0;P97427;Q3TY94	Q9ERI6;Q569U9;Q3UQM5					Q99K23
	Q9CYK1	Q9EQ80;Q3V2R8;D3Z0G0;Q8C608;Q5FWC8			A2AJ72;Q3TIX6;Q3ULP9				D3Z4U5;D3Z555;G3UYZ9;Q8BVL9	Q8CCK0;Q8BP16;A0PJB8					Q9CSS1;E9PZM7;Q6ZPE9;Q7TML8	Q3UW53;E9PYV4;Q3TDH5;D3Z233;D3YYZ9	Q4FZL1;Q5F2A7;P60843;Q3UXC2;Q3TGK7;Q3TFG3;Q3TLL6;Q3U8I0;Q78WR5	Q5SVG5;Q5SVG4;O35643;Q8CC13;Q3TVN4;Q3U1K9							P0C028;P0C027	P48722;P48722-2;E0CY23	Q3UW40;Q8BP67;Q8BT08;Q9CS31	Q3TSR1;Q91XD6;Q3UBB2							Q8BUY5	Q3UIJ2;Q3TML6;Q9Z0N1;Q3UDF8;Q9CRE9;Q3U5H6;A2AAW9	Q76MZ3;Q8C2E1;Q7TMX2	Q9JME5					P28740-2;E0CZ72;P28740;P28740-1
	D3YZZ5;E9Q7G1	A1E5T5;P51807;Q9CT63;Q9DAS3			Q3UYH7;Q8BVT9				G3XA13;Q99NH2;B2RUK1;B7ZNY3;F6S7Z1;A5D6P2;Q99NH2-2;E0CXR8;E0CZE2;E0CZ83;E0CXL4;Q99NH2-4;Q8BPQ6;Q8BPQ4;E9PYJ2;F6TSJ9;Q99NH2-3;E0CX45;E0CY24;Q99NH2-5;F6UGU7	Q5BLK1;P62754;Q8BT09;Q3TL53					B7ZC46;B1AQY9;B1AQZ0;Q8CHH9;Q8CHH9-2	Q7TPW6;Q9Z2Z6	Q3ULB1;Q921W7;P47226-2;P47226	Q3UIA5;Q9WTX6;Q05DR6;Q3TPM3							Q63918	Q3UW40;Q8BP67;Q8BT08;Q9CS31	Q810A3	Q69ZX3;E9QPE7;Q8R384;O08638;O08638-2							A7YY80;D0VYV7;B6ZHD1;V6BQR3;Q8BGK4	Q1WIL9;E9PYN1;Q8R5M8-4;Q8R5M8-3;Q8R5M8-2;Q8R5M8;Q8R5M8-7;Q8R5M8-6;E0CY16;Q8R5M8-5;Q9QYL3;Q9QYL4	E0CXZ1;J3QM95;F8WGT4;Q8BYN5-2;Q8BYN5	Q52L87;P68373;Q3TIZ0					E9Q6U4;Q3UWL8
	Q8K239;Q9CZR8;Q3TA37;Q80UT3;Q8VDE3	Q99LC5			Q14C26;Q9EP72				P62911;Q5PR09	P57759					Q9DCC4	Q8BJW6;Q8BJW6-2;D3YZZ6;D6RFN2;D6RGA6	I6L960;G3X9Y5;Q6A0C5;E9Q735	A2AQL0;Q9Z1W9;G1JLS7;Q3V256							Q3U741;Q501J6;Q3TU25;Q501J6-2	Q80TZ3;Q80TZ3-2;Q80TZ3-3	Q3UE99;A2RTI3;O89017	E9QL65;Q3USH9							Q99LX0;A2A813;A2A815	Q9CR70;J3JS94	Q1WIL9;E9PYN1;Q8R5M8-4;Q8R5M8-3;Q8R5M8-2;Q8R5M8;Q8R5M8-7;Q8R5M8-6;E0CY16;Q8R5M8-5;Q9QYL3;Q9QYL4	Q8R1B4;Q66JU1					F8VQ28;Q8VI36-2;Q8VI36;Q3UG90
	P57784	Z4YKB8;Q3TEA8-2;Q3TEA8;Z4YKA3;Q3TEA8-3;A2AM65			Q99LC2				Q8BM84;P70372;Q8BVF8;Q8BTQ1;Q3UFF9	A6H663;Q9JLV1;Q3TAM9					Q91V55;P97461;D3YYM6	Q6PIP5;Q8BJK0;Q8C100;Q3UZN2	Q6A028	Q8K0C4							Q9D7S9	Q3TF14;P50247;Q3U4D1;Q5M9P0;Q3U5U5;Q8BPI7	Q3TF14;P50247;Q3U4D1;Q5M9P0;Q3U5U5;Q8BPI7	Q6PDY2							P30416;F6S2D5;D6RDE2	P62918;Q3UJS0;Q3THC7;Q9Z237	Q8R059	Q8VHK9;A0JLR3					Q9CQ19
	P05063	F8WIG4;Q3TI08;Q3TY03;Q62384;F8WHU9;Q9JJA1;Q3TIH8;Q9CUE2;Q8C8U3			Q8N7N5;Q8N7N5-2				F6Y616;Q8VE62;D3Z3J6;G3UYE5	E9Q509;Q3UEI4;G3X925;Q3UEH4;P53657;A7MCU9					P80316	Q6XLQ8;Q3TL33;G3UYI3	Q9WUP7-2;Q9WUP7;A0A087WP81	B9EHJ3;P39447							Q3TA59;F6Q269;D3Z1G6	O54941	P48722;P48722-2;E0CY23	Q3UDS1;Q3U057;Q9QXK7;Q9CWL0;Q3TC91;Q8BRA5;Q497G2							Q545G0;Q9R1P1	P97449;Q3UP74;Q3TB69	Q3TVI6;Q3TGG0;Q8K3G9;Q3TB15;Q3U3Y3	Q6P8M1-2;Q6P8M1					O89079;D3Z315;F6YFR7
	Q9R1C7-2;Q9R1C7	D3YZZ5;E9Q7G1			Q545V3;Q3UJ20;P17183;D3Z6E4;Q922A0				E9Q3H7;E9Q0B6	P61022;B0R091					Q3UC02;Q9DB79;P62281;Q9D0P6	B2RXW8;B2RXQ2;B8QI33;S4R1D4;Q3UJC0;S4R1I7	P55937-1;P55937	Q05BF9;A8Y5Q1;A2AJP9;A8Y5Q0;A2AJQ0;Q3UV70							Q3U6D7;O55100-2;O55100	Q5SW18;P63005;Q3UH92;Q3UGR6;Q3TJG1;Q3UHM0;P63005-2;Q3TIK0	Q3UPL0;Q3UPL0-2	Q3UME9;Q3U026;Q80UM7;Q3U950;Q3U8P9							P24529;Q3UTB3;E9Q9G5	Q8R059	Q9CR70;J3JS94	Q91YH5;E9PYT3;Q91YH5-2					O70423;O70423-2;A2A4I8
	Q9D0M3-2;Q9D0M3	Q03265;D3Z6F5			Q8R4X3;Q6ZQ53;F6YJB6;V9GXJ1				Q8C2Q3;Q3U6A2;E9QL13;Q8C2Q3-2;Q62019	D3Z7X0;D3Z2B3					Q9JKX6	Q6RI64;O09061	Q8R2K1;D3YWS7;F6SJM7;Q8R2K1-2;Q8R2K1-3;Q8R2K1-5;Q8R2K1-4;F6X9P4	Q9D8C2							Q3UKV4;D3Z5N6;Q61103;F8WIP7	Q3U0V1	Q5SW18;P63005;Q3UH92;Q3UGR6;Q3TJG1;Q3UHM0;P63005-2;Q3TIK0	Q8K1E0;I1E4X1;Q8K1E0-2;H3BJE3;H3BKJ7;H3BJ02;H3BKP0							Q9CW46	Q542X7;P80314;Q9JJD8	Q542X7;P80314;Q9JJD8	Q8CEJ4;Q62468					P14576
	Q549X6;Q9R0Q1;Q9R0Q1-3;Q9R0Q1-2	E9Q6A6;Q8C6K9;Q8C6K9-2			P61082;F7CDT0;F6WMC0				Q8R086	E9Q4D5;Q8VEL9;Q8VEL9-2					Q9D881;P19536	Q52L55;Q9QYC3	Q8K2C7	Q7M6Y3-5;Q570Z8;Q3TD51;Q7M6Y3-2;Q7M6Y3-3							Q3TAH3;Q9CPP0	Q3UPL0;Q3UPL0-2	E9Q3M3;Q6NZM3;O08788;O08788-2	Q9D394-2							Q9ESU1;Q6ZWP4;Q9Z0H3;Q9ESU0;Q3UDA4;Q9Z0H3-2;Q9JJD1	Q7TMK9-2;Q7TMK9;G3UZI2;G3V018;G3UZ48;G3UXJ6	Q7TMK9-2;Q7TMK9;G3UZI2;G3V018;G3UZ48;G3UXJ6	Q8R1F1					B9EKJ7;P58871;Z4YJL4
	P61922;Q3V1S0;P61922-2	Q3TET1;Q3UI47;B1AQZ2;P28741;Q80UK1;Q3TSP1;Q3TTS7;Q8CGJ1			Q64374				Q99NF7;Q5BKS2	Q5FW97;P17182					Q5BLJ9;P61358;Q9CSM4;A2A4Q0	Q9JMA1;E9PYI8;Q80UN0;Q3TC32	Q8CB77	F6RPJ9;Q8CGB9;Q9JHR7							Q3UJ84;Q3U417;Q8C8U0;Q8C8U0-3;Q8C8U0-2	Q810A3	Q8C298;E9Q179;Q8C5Q4	O89116							Q8VE22;F7ARZ1;Q3TI14;Q3THH3;Q99LZ4;Q5SXC9;A7M7Q8	Q9WV98	Q9D881;P19536	Q3THE2					Q69ZW3-2;Q69ZW3
	E9Q6A6;Q8C6K9;Q8C6K9-2	Q8C4B4;Q8C4B4-2			Q6PDI4;Q3USH5				Q78ZM0;O70492;D3Z789;Q9CU14;Q9CSC2;D3Z6Z0	Q3U9G2;P20029;Q3TWF2;Q3TKF8;Q3TI47;Q9DC41;Q3U7T8;Q3UEM8					Q922F6	A2AQ53;O88840;Q61554;Q60784	O89079;D3Z315;F6YFR7	Q8CIM8;Q8CIM8-2							D3Z5M2;Q99LF8	Q8VE88-2;Q8VE88	Q8CH18;Q8CH18-3	K3W4R5;A2AGT5-3;A2AGT5;Z4YL78;A2AGT5-2;Q80U79							B9EHZ5;Q9JLB0-2;Q3UN60;Q9JLB0;Q6NSS8;Q811G2	Q3UVN5;Q9CZ44;Q9CZ44-3;Q3KQQ1;A2AT02;Q9CZ44-2	Q3UIJ2;Q3TML6;Q9Z0N1;Q3UDF8;Q9CRE9;Q3U5H6;A2AAW9	A0JNY7;Q62448;G3XA17;Q62448-2;F7CBP1;Q3U9U9					Q3TUQ7;Q5EG47
	Q921W4;D3YZD6;D3Z6I4;Q921W4-2;D3YU21;F7BGV1	Q3TJ91;J3QJU5			Q547R0;E9QAT0;Q6AXB7;P35922-3;P35922-2;P35922;D3Z6U8;E9QNF5;E9QAS8;P35922-9;P35922-8;P35922-7;E9QAS9;P35922-5;P35922-4;P35922-6;P35922-11;P35922-10;P35922-12;Q8BPK8				Q9WTX2	Q3U0F3;Q91VK4;A0A087WRM2					Q8R059	Q5BLJ7;P62301;Q921R2	Q99LG0;D3YVU1	F6V035							S4R2J9;Q3TLH4-5;Q3TLH4;S4R294	Q9WVA4	Q4FJU3;Q9DCT8	Q99PB4;Q9ER67;Q3TFU3;A2AG46;A2AG48							Q99JY0	E0CXZ1;J3QM95;F8WGT4;Q8BYN5-2;Q8BYN5	Q9WV98	P10852-2					D0EW11;Q8K5B2;Q99KV4;D3Z6A4;D3Z1G3
	Q3TDQ5;G9M4M6;Q8C0J2-2;Q8C0J2-5;Q8C0J2;Q8C0J2-3;Q8C0J2-4;Q3TQX8	Q8BUY5			G3X8T9;Q91WP6				M4TKR7;P15208	Q60668-3;Q60668;Q3UXC8					Q8R1S0;D3YW66	Q0VGU4;A0A087WQ93	Q5GQ64;Q9Z0F7	K3W4R5;A2AGT5-3;A2AGT5;Z4YL78;A2AGT5-2;Q80U79							Q80X54;Q91YJ2	S4R1F9;S4R249;Q8C8R3-2;S4R2H6;S4R2F3;S4R285;Q8C8R3;S4R2D0;Q8C8R3-5;S4R1J9;S4R2T7	Q9WVA4	Q80UI9;Q3TDI2;P56695;Q3UN10							Q3ULG4;O35226-2;O35226-3;O35226-5	Q9ERB0	O54941	Q497N1;P62855					A3KGQ6;Q9D898
	A1E5T5;P51807;Q9CT63;Q9DAS3	Q5F258;Q68FF6			Q91ZZ3				Q8K3H0	Q04447					Q6ZWZ6;P63323	Q8CB77	Q9CPY7-2;Q9CPY7	Q4KML7;Q3UL48;P26040;Q3UXR4;Q3TCP5;Q8CBU4							Q9QZ83	Q8CH18;Q8CH18-3	Q8VE88-2;Q8VE88	Q99J27							O54988	Q9D881;P19536	Q9ERB0	Q0P5W2;Q8C0L0;A2ARI0					A2ASW4;Q9EQZ6-3;Q9EQZ6;A2ASW8;Q571A8;Q9EQZ6-2
	Q3ULG4;O35226-2;O35226-3;O35226-5	Q3ULG4;O35226-2;O35226-3;O35226-5			Q14C24;Q9D883;G3UW94				Q9EQ20;Q8K0L1	Q99KF5;P00493					P68372;Q9CVR0;Q9DCR1	Q3TA59;F6Q269;D3Z1G6	P63242	J3KMQ6;Q9CYI0							P62843;Q3UK70;Q3UXS6	E9Q3M3;Q6NZM3;O08788;O08788-2	P97449;Q3UP74;Q3TB69	Q9CQ88							Q8VDM1;F7C2Y9	Q9JKV1;Q8VCI8;D3YUD8	Q9JKV1;Q8VCI8;D3YUD8	Q9Z2X8;Q05DM3;Q3UWI4					Q80U95
	E9QLB2;Q3UFF7	Q9JLI6;Q9JLI6-2			P83917;Q7TPM0;Q9CYJ8				Q3TH57;Q8CGF7-2;Q8CGF7;Q8CGF7-3	Q8BH43;Q3T9Z7;Q80UQ8					Q91WU5	Q9Z0Y1;E9Q919	Q60951;Q3UBT1;P62960;Q71V06;Q810K5;Q60950	Q8BK29;B1AT82;Q9D0M1;B1AT83							Q810A3	A2RSB1;B7ZNL2;Q8C1W9;Q78ZA7	Q8BFQ8	Q80UU9							B2CY77;P14206	Q4V9T8;P48024;Q3UBT8;J3QN87	Q3UVN5;Q9CZ44;Q9CZ44-3;Q3KQQ1;A2AT02;Q9CZ44-2	Q3U2F9;Q3THF3;P29387					P63242
	P50518	P05063			J3KMT7;Q08122-4;E0CXS2;E0CY14;F8WIE2;E0CXS9;Q80TC1;Q08122-2;Q08122-1;Q08122;F6TS96;Q3TY99;E0CXU1				Q9JKX6	D5MCW4;Q9CQ89					E9PXM6;A8VP81;Q3TCZ2;Q3UJY1;Q9JIM1-2;Q9JIM1;E9PWY7	P68040	A2AT37	F8VPN4;F6XXE6							O88291;D3YXQ7	P31230;Q3UZG4;Q8C2U7	S4R1F9;S4R249;Q8C8R3-2;S4R2H6;S4R2F3;S4R285;Q8C8R3;S4R2D0;Q8C8R3-5;S4R1J9;S4R2T7	A2AJI0-2;A2AJI0;F6WF36							Q9CQY2;D3YZS0	O54941	A2AQA9;A2AQB2	F8WID5					Q9D104;G5E8T3;Q9CRF7;Q8BZ07;Q9D7A6
	G3UXL2;Q9D7G0;Q3TI27;Q3UPD5;Q3UYQ0	Q3UXQ1;Q05CG5;O55176;B1AXU3;B1AXU4;O55176-5;O55176-4;O55176-2			Q80VD1				B1GX80;B1GX81;Q61036-2;Q61036;A3KGC5	Q3UNI8;O35215;G3UZN1					B2RSN3;Q9CWF2;Q99J49	Q9D394-2	Q91V55;P97461;D3YYM6	Q91VW5							Q9D8U3	P17751;H7BXC3	Q9CSS1;E9PZM7;Q6ZPE9;Q7TML8	Q5EBQ6;P51410;Q5M9J5;D3Z629							Q3UYP2;Q3TVT6;Q9CQF9;Q99JK4	Z4YJU8;Q5DTL1;E9PUQ5;Q921M4-2;Q921M4	Q9JJV2-3;Q9JJV2;D3YWS3;Q9JJV2-2	Q8K2Q0					Q9CQ56;Q5I940;Q05CJ0;Q9CQ56-2
	P48678;P48678-2;P48678-3	Q60865;Q3UFZ6			Q5SVF7;O55125;Q3UGS1;Q5SVG6				Q8K370;Q9CRH8	Q9DBS5					Q9DBP5	Q9CPY7-2;Q9CPY7	Q91VM9;D3Z636	G3X8W7;Q8BGZ4;Q8BGZ4-2;Q3TEF0							Q3UTJ2	P97449;Q3UP74;Q3TB69	P17751;H7BXC3	Q3UE92;Q3UKF5;S4R1I3;Q6P1B1;Q3TL27;Q8VDK8;Q8BKH1							Q8BWT1;Q3UKH3	Q5D098;P70195	Q4V9T8;P48024;Q3UBT8;J3QN87	Q9CQ45					Q5SWZ5;F6S5I0;F6RND9;P97434-3;P97434;P97434-5;P97434-2;Q8CHC7;P97434-4
	Q3THA6;Q8BL97-3;Q8BL97-4;Q8BL97-2;Q8BL97	Q3THA6;Q8BL97-3;Q8BL97-4;Q8BL97-2;Q8BL97			Q9ERB0				Q8CCK0;Q8BP16;A0PJB8	Q80XU5;E9Q861;Q8BNT6					Q5BLK1;P62754;Q8BT09;Q3TL53	O89079;D3Z315;F6YFR7;F6XIG5;E9Q6I5	Q3UHJ0;Q3UHJ0-2	G3UXH4;Q8BWW9;G3UZM9;Q8BWW9-3;Q8BWW9-2							Q3UD26;O35593;Q9CSU2	Q8VEH8;Q9CWA6	E9QKR1;J3QNM3;E9QKQ9;E9QLZ9;Q03173-6;Q03173-3;Q03173-4;Q03173-5;Q03173	Q8BYU6							Q3U102;Q925F2;Q05CZ9;D3Z5Y0	Q8CIN4	Z4YJU8;Q5DTL1;E9PUQ5;Q921M4-2;Q921M4	Q14AC7;P61211;Q9D7H9;Q3TIR2;F8WIB1;Q4V9U3					G5E850;Q544Z9;P56395
	Q8BTS0;Q61656;Q5U222;Q3V0Z8;A1L333;Q3UXW3;S4R1I6	P50518			D3Z0F5;Q3UIT2;O88545				P61022;B0R091	Q9D967					Q8VDS4	Q3UVN5;Q9CZ44;Q9CZ44-3;Q3KQQ1;A2AT02;Q9CZ44-2	F6ZFU0	Q8BHD7							O54988	E9QKR1;J3QNM3;E9QKQ9;E9QLZ9;Q03173-6;Q03173-3;Q03173-4;Q03173-5;Q03173	A2RSB1;B7ZNL2;Q8C1W9;Q78ZA7	F8VQC9;I1VGT4;D3Y272;E3UVT8;I1VGT5;H6WZF5;J9RZB2;J7H931;J9RV59;D3Y273;H6WZ45;I1VGT6;Q8BTY2-2;Q8BTY2;U3RKD2;J9RDH0;J9S4N6;E3UVT9;U3RF68;J9S7F7							Q60973;A2AFI9;A2AFJ1;Q3UJI2;Q3UX53;Q8C5H3	Q9JJV2-3;Q9JJV2;D3YWS3;Q9JJV2-2	Q9QXT0	Q561N4;P68037					Q9JIK5;Q6PCP0;Q3ULC7;Q9CWZ5;Q8K2L4
	F8WIG4;Q3TI08;Q3TY03;Q62384;F8WHU9;Q9JJA1;Q3TIH8;Q9CUE2;Q8C8U3	Q9CR68			Q8K3H0				P61082;F7CDT0;F6WMC0	E9QLB2;Q3UFF7					E0CXZ1;J3QM95;F8WGT4;Q8BYN5-2;Q8BYN5	I6L960;G3X9Y5;Q6A0C5;E9Q735;Q8VDS1;E9Q442	O70423;O70423-2;A2A4I8	Q78JE5;Q3V492							Q8VE22;F7ARZ1;Q3TI14;Q3THH3;Q99LZ4;Q5SXC9;A7M7Q8	Q9QXT0	Q8C292;Q8C1V4;Q3TIV6;Q99MN1;Q8CFK5	Q6ZQI3;D3Z1M3							Q91VR5;Q922B8;Q3V1Z7	Q9QXT0	Q8CIN4	Q8CIM8;Q8CIM8-2					Q62084
	Q91WM2	B7ZWM8;B2RXP1;E9QAU9;Q8BVU0			Q3TPU5;O70378;Q8C988;Q3TTC9;M0QWY0;M0QWP2				Q8BMJ3	Q8BIV6;G5E895;Q8CI22					E9QLB2;Q3UFF7	Q3UK39;Q3UJN1;P97310	B7ZN44;A5CVE4;I1E4X8;B2RQE3;P83093;Q8BIM2;F6WBP9	A2AQA7;Q8CFQ3							F8WIG4;Q3TI08;Q3TY03;Q62384;F8WHU9;Q9JJA1;Q3TIH8;Q9CUE2;Q8C8U3	Q8C292;Q8C1V4;Q3TIV6;Q99MN1;Q8CFK5	Q6P1A9;Q5EBG5;Q58ET1;Q80UT7;P12970	B2RTB0;Q3UHX2;Q1WWJ8							Q7TQH0-2;Q7TQH0-3;Q7TQH0;Q3TGG2;E9Q5Q0;Q3TYH7	A6H663;Q9JLV1;Q3TAM9	Q8BYK6-3;Q8BYK6;Q7TN20;Q8BYK6-2;Q8BVC6	P43275					A2ASS6;E9Q8N1;E9Q8K5;A2ASS6-2
	Q8BGR9	Q3UZ63;Q3UL31;Q6NZF1;Q3TIV2			Q99LU0;Q3TJ28				Q8C1A5	P97930;Q6GRA7;P97930-2					Q3U647;Q60967;Q6NZM8;Q3TUA8	E9PXX7;Q3TEE8;Q91W90;Q3UBW8;Q3UWX1	A2AQ53;O88840;Q61554;Q60784	P99027							G3X8Q0;O89090;A2TH11;O89090-2	Q9JKV1;Q8VCI8;D3YUD8	Q8VEH8;Q9CWA6	Q3UD03;Q3U199;Q3TCV9;Q6NSR8							Q3TC93	P31230;Q3UZG4;Q8C2U7	Q5F2E7;Q5F2E7-2	Q9Z2Q6;B7ZNM7;Q52KH2					D3Z2U7;F6U9F5;F6Q346;F6W4F5;E9PWV9;D3Z7M6;F6QKL8;P27699-10;P27699-2;P27699-8;P27699-7;P27699-6;P27699-5;D3Z7P7;D3Z326;Q78Z98;F6VJ22;D3Z6A5;F6QWT6;P27699-11
	F6Y616;Q8VE62;D3Z3J6;G3UYE5	Q3U3H9;P61963;Q80ZU1			Q6F4J1;P83887;Q6F4J0;Q8VCK3				Q3ULW0;P62827;Q14AA6	Q99L69;Q3U3J1;P50136					D0EW11;Q8K5B2;Q99KV4;D3Z6A4;D3Z1G3	Q99KK2;Q99KK2-2	G3UYV7;Q059I1;P62858	Q6PGL7;Q6PGL7-2;Q8BRP9							Q9CQZ1	Q8BFQ8	Q9JKV1;Q8VCI8;D3YUD8	Q2M4I9;A2A4A6;Q62077;Q3UZ68							Q9DBP5	Q8BYK6-3;Q8BYK6;Q7TN20;Q8BYK6-2;Q8BVC6	P31230;Q3UZG4;Q8C2U7	P52479;P52479-2					Q52L87;P68373;Q3TIZ0
	Q3U3H9;P61963;Q80ZU1	G3UY42;Q8CCS6-2;Q8CCS6;D3YUB9;D3Z5F7;D3Z055;G3UWS5			F6Y616;Q8VE62;D3Z3J6;G3UYE5				Q9R1K9;Z4YJH1;B1AUQ7	P09411;S4R2M7					P60335	Q3UHW2;Q3TT11;P51660	B7ZC46;B1AQY9;B1AQZ0;Q8CHH9;Q8CHH9-2	Q9DBG7							Q99LX0;A2A813;A2A815	Q3UJR8;Q64152-2;Q64152	Q9QXT0	E9QQ10							P97300;P97300-1;H3BIX4;Z4YLB7;P97300-3	A2AQA9;A2AQB2	A6H663;Q9JLV1;Q3TAM9	Q91WG4;Q91WG4-2					F8WHT3;Q7TPM1;F7AYW2;A2AN33
	P60824;K4DI65;D3YU80	G3X8Q0;O89090;A2TH11;O89090-2			Q91X52;A2AC16				Q5F285	Q8BHC2;Q9CX00					Q8BTX5;Q5M9L0;Q3TII2;Q91WK2;Q3THW7;Q3TIK5	Q4FZL1;Q5F2A7;P60843;Q3UXC2;Q3TGK7;Q3TFG3;Q3TLL6;Q3U8I0;Q78WR5;Q3TSJ4;Q99LR0	A7VJ98;Q9CQI3;Q80X87	P41241;Q3UVH2;Q8BIS9							E9Q4Q2;D3YZC9;D3YZD0;Q3UK67;Q3UI45;Q64213-2;Q64213-3;Q64213;Q3TZI3;D3YVH4	Q6P1A9;Q5EBG5;Q58ET1;Q80UT7;P12970	P31230;Q3UZG4;Q8C2U7	Q8BJ71							D0EW11;Q8K5B2;Q99KV4;D3Z6A4;D3Z1G3	Q5F2E7;Q5F2E7-2	Q9Z2X1;Q9Z2X1-2;J3QM80;J3QMT0	Q53WR6;Q61543;F8WHM5					Q9D7E4
	Q3TET1;Q3UI47;B1AQZ2;P28741;Q80UK1;Q3TSP1;Q3TTS7;Q8CGJ1	Q3UWQ9;Q3UJ70;Q8JZK9;Q8K0I5			B2RUK5;Q3ULD5;Q6PD20				Q64374	Q9CWK0;Q9CR57					O55234	Q91VM9;D3Z636;Q91VM9-2;G8JL76;D3Z096	Q3TQZ7;Q80W82;Q80W81;Q78GB8;Q8C9D4;Q80W80;E9QN59;Q61831-2;Q61831;Q544A0;A6P3E4;Q7TSJ7;G3X8U9;Q91Y86	Q8K1E0;I1E4X1;Q8K1E0-2;H3BJE3;H3BKJ7;H3BJ02;H3BKP0							Q3V038	Q3URU2;Q3URU2-2;Q0P5Y8	Q3UJR8;Q64152-2;Q64152	D3Z079;Q8K400;D3Z2Q2;Q8K400-2							Q3TYA4;Q8R3T5	Q9Z2X1;Q9Z2X1-2;J3QM80;J3QMT0	Q5D098;P70195	Q571B0;Q9ET30;Q8C6F5;Q3UH23					A1L3B8;P26516
	Q543K9;P23492	Q8BTS0;Q61656;Q5U222;Q3V0Z8;A1L333;Q3UXW3;S4R1I6			Q9CWW6				Q9JLI6;Q9JLI6-2	Q8BN32;P29341;Q3U8U8;Q99KL3					D3Z3B2;E9Q9C5;Q8C1D9;Q3UK60;A3KML5;Q80YP7;P63082	A2AQA9;A2AQB2;Q9JL90;F6X9B6;Q62411;G3UWS1;Q61953	Q4VA29;Q9CQE8;J3QNB0	Q8BFU3;Q8BFU3-4;Q8BFU3-3;Q8BQY0;Q8C8I5;Q8BFU3-5;Q8BFU3-2							Q9JKB1;Q8BWQ9	Q9CSS1;E9PZM7;Q6ZPE9;Q7TML8	Q3URU2;Q3URU2-2;Q0P5Y8	Q58E29;Q0VEW4;Q9R1Q7							Q810A3	P70158	Q3TU85;Q61696;Q3TAI8	Q8BHN3					Q9JKR6
	P62137;Q3U8W0;Q3TYF5	O35295			B1GX80;B1GX81;Q61036-2;Q61036;A3KGC5				Q545I7;P01325	Q543K9;P23492					P57759	P57759;A8C1V9;F8WJI4;F8WIM7;D6RG87	Q04750	Q9D8S9							Q8R404	A0A087WST2;Q8BX09-2;Q8BX09	A0A087WST2;Q8BX09-2;Q8BX09	Q8VHC3							Q3U4U6;P80318;E9Q133;Q3U0I3;F6Q609	P62077	Q8BK29;B1AT82;Q9D0M1;B1AT83	Q7TMC8;Q8C7W3;Q7TSB1;Q8CI18;Q6KAP2					Q8BQV7;Q6ZWX1;O55142;Q9DC85
	Q8C4B4;Q8C4B4-2	Q3TUQ5;O35691;Q9CV89			E0CXZ1;J3QM95;F8WGT4;Q8BYN5-2;Q8BYN5				A2APY7;A2APY7-2	Q6ZWZ6;P63323					P62843;Q3UK70;Q3UXS6	A7VJ98;Q9CQI3;Q80X87;D3YY93;D3Z2F6;D3YY16;Q3U6A4	Q0VGU4	Q91ZH2;Q542J9;P17918;Q9CZD6							Q3U2G2;Q571M2;Q61316	Q3U1S6;Q91W50;Q8JZN2;Q80TP8;Q3U4S7;Q3TXH7;Q8R3R1;Q3U672	Q7TQE2;Q8CBM0;Q3TCR9;Q62523;Q8CD55	E9Q6R7							Q3UBU9;Q62446	O88712-2;O88712;O88712-3	Q8BJW6;Q8BJW6-2	Q6P8X1					P37804
	Q3UM45	E9QLB2;Q3UFF7			Q8R3Y8-2;Q8R3Y8				Q9CS68;Q9WV84;Q9D0C5	Q9Z2H7					P18608;D3Z607;Q8CEW1	Q545N8;Q9Z2M7;Q9D1M5;Q9DCE3;Q9CZE9;Q9D6D9;Q91W01;Q545Q8;O35621	Q9D031;Q01730;Q3TFN7;A2AUR7;Q9CSE4;Q9CUS2	Q540D7;Q9JII6;Q80XJ7;Q3UJW9;B1AXW3							Q5SUT0;Q3UI30;Q6NVA3;Q5SUS9;Q61545;Q9CRS5	A2A7Z4;Q78IG7;Q9CQH7	Q8BGT7;Q3TGV3	Q5SVG5;Q5SVG4;O35643;Q8CC13;Q3TVN4;Q3U1K9							Q99KD6;Q3UDK5;E9PZS8;Q61387;Q3U7R2	Q8BK29;B1AT82;Q9D0M1;B1AT83	O88712-2;O88712;O88712-3	F8WIA4;Q8VCZ6					Q8R3D5;P57016
	Q5FWB7;P05064;A6ZI44;Q6NY00;D3YWI1;Q9CPQ9	Q5FWB7;P05064;A6ZI44;Q6NY00;D3YWI1;Q9CPQ9			Q9Z130				Q99M46;P97760;Q9DB22;Q3UUX3	Q99K28;Q99K28-2					Q8K0C9	O55222;F6Q5Z1;D3YZA5	Q9CQ19	Q52KC1;P10630;Q8BTU6;E9Q561							Q3ULG4;O35226-2;O35226-3;O35226-5	Q3UJ84;Q3U417;Q8C8U0;Q8C8U0-3;Q8C8U0-2	Q3U9V4;P62880;E9QKR0;D3YZX3;D3Z1M1;D3Z1T4	O08547;E9Q6R3;Q3UZ06							Q8K1M3;P12367	Q3TU85;Q61696;Q3TAI8	P62077	Q6NT99					Q9JKV1;Q8VCI8;D3YUD8
	Q3U7Z6;Q9DBJ1;Q6NWV5	Q6A0D1;Q9CRD2			A7VMV2;Q99KP3				P63280;Q8CFZ0;G3UYP0	Q60932-2;Q3U6K8;Q3TIG8;Q3THL7;Q60932;F2Z471					A2RSW6;Q8CFA2	O70423;O70423-2;A2A4I8;A2A4I9;Q812C9	P81117	Q99JZ4;Q3TXJ4;P36536							Q9CWJ9	Q5D098;P70195	Q3UJ84;Q3U417;Q8C8U0;Q8C8U0-3;Q8C8U0-2	Q8CB77							P17751;H7BXC3	E9QKR1;J3QNM3;E9QKQ9;E9QLZ9;Q03173-6;Q03173-3;Q03173-4;Q03173-5;Q03173	E9QKR1;J3QNM3;E9QKQ9;E9QLZ9;Q03173-6;Q03173-3;Q03173-4;Q03173-5;Q03173	Q3TZ63;Q8R3D1					E9PYJ7;Q6ZPQ6-2;Q6ZPQ6;Q6NS55;Q3UEE4
	Q9JLZ3;F6RT60;F6R307	Q543K9;P23492			Q542I7;Q3TX23;O88653				Q9CWK0;Q9CR57	Q52KP0;Q9JJI8					Q8K2H2	F6ZFU0;Q9CVV2;E9PUM6	D0EW11;Q8K5B2;Q99KV4;D3Z6A4;D3Z1G3	Q9CPW2							Q3UHZ7;Q3TAD4;Q91YN5-3;Q91YN5;Q91YN5-2	Q8BGT7;Q3TGV3	Q3U1S6;Q91W50;Q8JZN2;Q80TP8;Q3U4S7;Q3TXH7;Q8R3R1;Q3U672	Q8CBP1;Q8C762;Q3TJI7;Q04736;D3YZ57;P39688-2;P39688							Q9JJL8	Q8BJW6;Q8BJW6-2	Q8C4Q6;Q8C4Q6-2	Q6ZWR6-4;Q6ZWR6					Q9D394-2
	Q3UWQ9;Q3UJ70;Q8JZK9;Q8K0I5	Q8C1B7-3;Q8C1B7-2;Q8C1B7			Q9D1I5				P99026	Q3U7Z6;Q9DBJ1;Q6NWV5					Q8CAJ7;Q3U3I6;Q3TVK3;Q9Z2W0;Q8BPW9	Q5XJY5;Q3U4S9;Q8R1S6;Q3TDU1;Q8C0G7	Q9D7S9	B0QZX9;Q8BHC4							Q3TWG5;Q8R1Q8	Q58DZ3;P62889;Q497D7;Q5PR15	Q3TCW5;Q99J45;D3YUV1	Q3UDZ1;P84096							P68040	Q8C4Q6;Q8C4Q6-2	Q3V038	A1ILG8;Q8BX70;Q8BX70-3;Q8BX70-2					Q04750
	Q3TDV0;P62700;Q65Z92;Q3TMG7	Q9CRC9;D3YWR1;Q9CRC9-2;G3UXF5			Q99KF5;P00493				Q14C26;Q9EP72	G3X8T9;Q91WP6					F8VQ28;Q8VI36-2;Q8VI36;Q3UG90	P97868-2;P97868;D3YZU8;A0PJG9;P97868-3	Q8C2D2;P70362;Q9CWQ7;Q9CZJ3	Q91VC3;A2AFK7							P62077	Q7TQE2;Q8CBM0;Q3TCR9;Q62523;Q8CD55	Q8BYK6-3;Q8BYK6;Q7TN20;Q8BYK6-2;Q8BVC6	Q9Z1G3;Q3TG21;Q9D9Z4							Q3UTJ2	Q9CWJ9	Q80X54;Q91YJ2	Q8JZN7					Q8VCN9
	B2RQ68;B7ZW89;Q8R4U7	Q549X6;Q9R0Q1;Q9R0Q1-3;Q9R0Q1-2			Q7TMW1;Q6ZPH4;Q8C2E3;Q91YS2;P46061;Q3ULJ9				Q99L69;Q3U3J1;P50136	B2RUD2;Q811S7-2;Q811S7					Q7TQE2;Q8CBM0;Q3TCR9;Q62523;Q8CD55	Q3TGU7;P50580;Q05BN2;Q3UMW2;D3YVH7	Q9D8Z2	Q61074							A2BGI8;Q4G0C5;Q3UWH9;Q9D868-2;Q3UY37;Q9D868;A2BGI9	Q545G0;Q9R1P1	Q5D098;P70195	Q3UDP0							Q52L97;P52293;Q641N9;A2A600;A2A601	E9QB01;P13595-2;E9Q589;P13595-3;P13595-4	Q9CWJ9	O54774;Q3U237;Q3UR54;Q8CGH7;Q05CQ3					O08795-2;Q3U518;O08795;Q3TWG2
	Q8CAJ7;Q3U3I6;Q3TVK3;Q9Z2W0;Q8BPW9	P61922;Q3V1S0;P61922-2			E0CY18;A0A087WPF5;Q91X58				Q5M9N6;Q4VAF2;P61514;Q9CYW3;Q3TLC1;Q3U8M3	P63280;Q8CFZ0;G3UYP0					Q3U6D7;O55100-2;O55100	Q3UHJ0;Q3UHJ0-2	Q9D0J2;Q4FK74;Q9D3D9;Q9DCZ0	I3ITR1;Q9D924							Q3TF14;P50247;Q3U4D1;Q5M9P0;Q3U5U5;Q8BPI7	Q8BYK6-3;Q8BYK6;Q7TN20;Q8BYK6-2;Q8BVC6	Q3TDD8;Q3TSY9;Q8BGD9;Q3UGC0;Q3THB0;Q922K6;B2RWE8	Q8BMP6;Q6P9T6;Q3TJW1							Q8CE80;P51125-3;P51125-2;P51125-6;P51125;Q921U7;Q8C281;P51125-7;Q8CE04;Q8CB83	Q3V038	P70158	Q6GQU1;Q3UPC4;Q3TJE3;P17710-3;Q3UE51;G3UVV4;P17710-4;P17710;P17710-2;Q3TTB4					Q99KN2
	Q5F258;Q68FF6	Q8VE70;Q3TVB4;F8WI55			Q9DC36;Q8CDE0;Q5SS83;Q3UEG9;Q60634-3;Q60634-2;Q60634				J3KMT7;Q08122-4;E0CXS2;E0CY14;F8WIE2;E0CXS9;Q80TC1;Q08122-2;Q08122-1;Q08122;F6TS96;Q3TY99;E0CXU1	Q9R1Q8;Q9D6K2					Q91WQ3	Q3ULG4;O35226-2;O35226-3;O35226-5;F7AI87	A2RSB1;B7ZNL2;Q8C1W9;Q78ZA7	Q8BR90;Q8BR90-2							Q91V47;Q3UK94;Q684Q9;P21126;B2M0S0;B2M0R9	Q80XC2	A2A7Z4;Q78IG7;Q9CQH7	B9EIX2;Q80U49							Q3UBA6;P63017;Q3U9L2;Q3TEK2;Q504P4;Q3TRH3;Q3TQ13;Q3ULM1;Q3TH56;Q3TZJ3;Q3KQJ4;Q3UDS0;Q3TH04;Q3TB63;Q3UXU1	Q3TYA4;Q8R3T5	P31324	Q99JY4;E9Q7A5;E9Q8R5;Q8CF50					P60670;Q3UE06;Q3UDU9;P60670-2
	Q9CRC9;D3YWR1;Q9CRC9-2;G3UXF5	Q3TDV0;P62700;Q65Z92;Q3TMG7			Q9CSH3;Q8R2P7				E9QP00;Q3TAP5;Q6PFR5	G5E8N7;Q9JLV6;Q3T9F5;E9Q9A5;Q9JLV6-2					P68040	Q9JKB1;Q8BWQ9	Q9CXK3;Q497E4;P68033;Q3UIJ3;Q3TG92;Q61275;P68134;Q61264;Q61272	Q8K1L5							Q7TQH0-2;Q7TQH0-3;Q7TQH0;Q3TGG2;E9Q5Q0;Q3TYH7	Q9CYA0	Q9CYA0	Q501L4;Q3UAY3;Q8BMQ2;Q3UJL1;E9Q2B0;Q8BMQ2-2							Q3UHZ7;Q3TAD4;Q91YN5-3;Q91YN5;Q91YN5-2	P31324	E9QB01;P13595-2;E9Q589;P13595-3;P13595-4	Q9CPW2					Q3UNI1;Q53Z05;Q923E4;A7MCT8;Q923E4-2
	Q60865;Q3UFZ6	Q6P264;Q7TQJ3;Q9ER35			Q6NXW0;Q9WUA6-2;Q9WUA6;Q8C6X4				Q8CFZ2;Q62030;E9Q4D0;F6XJP7;H3BJL4	Q9DCL9					Q3TF14;P50247;Q3U4D1;Q5M9P0;Q3U5U5;Q8BPI7	I7HLV2;Q3THJ6;Q6ZWV3;P86048;B7FAU6;O89059	Q545X8;P62702;Q3UXQ6;Q545F8	E9PXY1;A2A432;A2A432-2;J3QJX0							E9Q3M3;Q6NZM3;O08788;O08788-2	Q3U9V4;P62880;E9QKR0;D3YZX3;D3Z1M1;D3Z1T4	Q3UVN5;Q9CZ44;Q9CZ44-3;Q3KQQ1;A2AT02;Q9CZ44-2	Q3TK92;Q9Z1K6							B2RXW8;B2RXQ2;B8QI33	Q80X54;Q91YJ2	Q6P1A9;Q5EBG5;Q58ET1;Q80UT7;P12970	B2RRC5;A2AWA9					Q9CXK3;Q497E4;P68033;Q3UIJ3;Q3TG92;Q61275;P68134;Q61264;Q61272
	Q3TUI3;Q8K2F0;Q05DR7;Q4G5Y4;Q5CCJ9;Q8K2F0-2;A2AKA9;Q53TY6	Q7TQE2;Q8CBM0;Q3TCR9;Q62523;Q8CD55			O35127				E9Q509;Q3UEI4;G3X925;Q3UEH4;P53657;A7MCU9	P27773					P97300;P97300-1;H3BIX4;Z4YLB7;P97300-3	Q6ZWZ4;Q5M9L1;P47964;D3YX71	Q6ZWU9	Q8CFI7							Q9Z2I8;C6EQH3;Q9Z2I8-2	Q3UVN5;Q9CZ44;Q9CZ44-3;Q3KQQ1;A2AT02;Q9CZ44-2	Q58DZ3;P62889;Q497D7;Q5PR15	A2RSF1;Q8K4M5;Q3UGT3;Q8VI86							Q8C298;E9Q179;Q8C5Q4	Q9CQZ1	Q3TYA4;Q8R3T5	Q9R190;Q3TZP3;Q3UDZ8
	Q6A0D1;Q9CRD2	Q91WM2							Q9DBS5	P62911;Q5PR09					P09411;S4R2M7	Q9D8Z2	Q3UIA4;Q9JHW9	Q3U5F9;Q9JJA2;Q3U184							Q8C650-2;Q8C650	Q99JF8;A2BI12;Q99JF8-2;Q05CD2	Q80XC2	Q99LG2;Q3U316;E9PV58;Q3U1S0							Q3UJ84;Q3U417;Q8C8U0;Q8C8U0-3;Q8C8U0-2	A0A087WST2;Q8BX09-2;Q8BX09	A0A087WST2;Q8BX09-2;Q8BX09	Q5M8Q0;Q3U7D2;E9QAZ2;Q9CZM2
	Q62048;D3Z375;Q62048-2	Q9D0M3-2;Q9D0M3							A6H663;Q9JLV1;Q3TAM9	Q4W8U9					Q642K1;Q58EW0;P35980;Q0QEW9;G3UZJ6;G3UZK4	Q3UC02;Q9DB79;P62281;Q9D0P6;Q9CW75	D3Z5M2;Q99LF8	Q9CQ71							Z4YJU8;Q5DTL1;E9PUQ5;Q921M4-2;Q921M4	Q3TCW5;Q99J45;D3YUV1	A2ASS6;E9Q8N1;E9Q8K5;A2ASS6-2	Q7TQK5;E9QAD4;Q8BUE0;Q8BWK1							Q810A7;Q810A7-2	P24529;Q3UTB3;E9Q9G5	P24529;Q3UTB3;E9Q9G5	Q8R550-3;Q3TA88;Q8R550-2;Q8R550;Q3TSX2;E9Q0C1;Q8R550-5;Q8R550-4;Q8R550-6
	P67778;Q5SQG5;Q3TV00	P60824;K4DI65;D3YU80							Q99LB4;Q3UJ44;D3YTL5;Q3TNN6;P24452;D3YZN3;D3YU77	Q5SVF7;O55125;Q3UGS1;Q5SVG6					Q8VDM1;F7C2Y9	Q99LG0;D3YVU1;D6RHQ6;D3Z6E6	Q3V1M8;Q3U4Z7;Q8VDJ3;A0A087WP83	Q925B0;Q925B0-2							Q6PDL0	Q60865;Q3UFZ6	Q99JF8;A2BI12;Q99JF8-2;Q05CD2	Q8K0E2;Q6KAR6;Q8BIT7							E9PW20;Q9CY57-3;Q9CY57;B7ZMS6;Q2VPR3;Q9CY57-5;Q9CY57-4;Q9CY57-2;D3YZA1;D3Z7T7	Q2TPA8;Q9D015;Q99JH2;B1AX78	Q2TPA8;Q9D015;Q99JH2;B1AX78	O89001
	B7ZMP1;B7ZMP1-2	B7ZMP1;B7ZMP1-2							Q5BLJ9;P61358;Q9CSM4;A2A4Q0	E9QP00;Q3TAP5;Q6PFR5					Q5EBG8	F8VQ28;Q8VI36-2;Q8VI36;Q3UG90;Q99LE7	Q3UFV9;Q91YW3;Q3UKA1	Q921M8;Q3TEX8;P35123;Q6NXV6;Q5DTK8;Q3TPN5							A0A087WNP6;Q4VAA2-2;Q4VAA2;A0A087WRM0	Q3UIJ2;Q3TML6;Q9Z0N1;Q3UDF8;Q9CRE9;Q3U5H6;A2AAW9	Q545G0;Q9R1P1	Q0PD35;P35282;Q6A0C7							Q8BH95;F6T930	Q80XC2	Q810A3	E9PVU0;E9Q175;E9Q3L1;B2RWR8
	Q3TXI9;Q3TWF3;Q53ZT3;P12023;Q3TVS1;Q6GR78;P12023-2;P12023-3	Q3U781;Q9D6W4;P84104-2;P84104;A2A4X6							E9QLB2;Q3UFF7	Q91WU5					Q5U438;Q5SQB7;Q61937;Q9DAY9;Q5SQB5;Q5BL09;Q3U536;Q8BSZ3;E9Q5T3	Q6ZWU9	Q5M9L7;Q8BT90;P63276;Q3TK12	Q8CIE6;Q8BTF0;F8WHL2;Q63ZW9							Q6ZQ47;Q3UYC8;A2BDX0;Q5BL11;Q5RKY4;Q9Z103	Q3TET1;Q3UI47;B1AQZ2;P28741;Q80UK1;Q3TSP1;Q3TTS7;Q8CGJ1	Q3TYA4;Q8R3T5	Q921L5;Q8C205							P62077	Q6P1A9;Q5EBG5;Q58ET1;Q80UT7;P12970	Q9CQZ1	Q3TUQ7;Q5EG47
	D3Z1F7;Q9DBN4;D3YXF2;Q9DBN4-3;Q9DBN4-2	Q99JY0							Q6P3A8;Q6P3A8-2	Q7TMW1;Q6ZPH4;Q8C2E3;Q91YS2;P46061;Q3ULJ9					Q3UM45	P81117;Q3TV28;S4R2R9	P37804	E9QKE4;Q8BMG7							Q9QZH6;J3KMM6	A2ASS6;E9Q8N1;E9Q8K5;A2ASS6-2	Q60865;Q3UFZ6	Q3U2W2;Q7TPV4;Q3TLF6							Q9CZX8;Q5M9P3;D3YUT3;D3Z722;D3Z5R8;D3YUG3	Q810A3	Q80XC2	V9GX40;V9GXD9;Q5SV85;Q5SV85-2
	Q7TQE2;Q8CBM0;Q3TCR9;Q62523;Q8CD55	Q4FJN2;Q64378;Q3TX72							B2CY77;P14206	A2ACL9;Q62443;Q3UST4					Q9CR68	Q69ZW3-2;Q69ZW3	Q6P1B9;O08539-2;O08539	Q5SUH7;Q3UPG6;Q99KN9;Q3UGL3							P68040	Q3UKV4;D3Z5N6;Q61103;F8WIP7	Q4FZE6;P62082;F6SVV1	Q9D7E4							Q8BXK9;Q9CYD1	Q8K009;D3Z6B9	Q8BFQ8	Q3TV94;Q52PE3;Q9CY50
	Q8BGH2	Q3U7Z6;Q9DBJ1;Q6NWV5							Q3UTI7;Q9QUR7	B2RRS4;E9PWV7;Q923K4;D6RDC6;Q923K4-2					P62918;Q3UJS0;Q3THC7;Q9Z237	Q9D031;Q01730;Q3TFN7;A2AUR7;Q9CSE4;Q9CUS2;B1AYQ0;E0CXH9;E0CXG5	A2ASW4;Q9EQZ6-3;Q9EQZ6;A2ASW8;Q571A8;Q9EQZ6-2	Q5SWR1;Q9DBG3;Q9DBG3-2;H3BIY9;H3BKM0							Q9JJL8	Q3TYA4;Q8R3T5	Q3TET1;Q3UI47;B1AQZ2;P28741;Q80UK1;Q3TSP1;Q3TTS7;Q8CGJ1	I6L960;G3X9Y5;Q6A0C5;E9Q735							P70122;F6TN03	Q60973;A2AFI9;A2AFJ1;Q3UJI2;Q3UX53;Q8C5H3	Q8K009;D3Z6B9	Q9WVP1-2
	Q5RL79	Q9CYK1							Q3TKM9;Q9CPW4;Q3UC32;Q3UA72;Q3TK56	A7VMV2;Q99KP3					Q6P1A9;Q5EBG5;Q58ET1;Q80UT7;P12970	Q9D104;G5E8T3;Q9CRF7;Q8BZ07;Q9D7A6;Q3UXK5;D6RHP8	Q810V0;Q9D7V6;A0PJ89	Q9D853							Q3TDN8;Q8R164	Q3TDD8;Q3TSY9;Q8BGD9;Q3UGC0;Q3THB0;Q922K6;B2RWE8	Q68EF0	Q3U506;Q3TLJ5;Q99LM2;Q3TSS9							Q3UW40;Q8BP67;Q8BT08;Q9CS31	Q3U1S6;Q91W50;Q8JZN2;Q80TP8;Q3U4S7;Q3TXH7;Q8R3R1;Q3U672	Q8CH18;Q8CH18-3	A2ASS6;E9Q8N1;E9Q8K5;A2ASS6-2
	G3X8Q0;O89090;A2TH11;O89090-2	Q3TDQ5;G9M4M6;Q8C0J2-2;Q8C0J2-5;Q8C0J2;Q8C0J2-3;Q8C0J2-4;Q3TQX8							Q8C4B4;Q8C4B4-2	Q7TMK9-2;Q7TMK9;G3UZI2;G3V018;G3UZ48;G3UXJ6					Q80T06;Q91VK2;P57776;E9QN08;D3YY68;D3YUQ9;D3YZT9	Q9CXK3;Q497E4;P68033;Q3UIJ3;Q3TG92;Q61275;P68134;Q61264;Q61272;Q61274;Q61273	Q3U1S6;Q91W50;Q8JZN2;Q80TP8;Q3U4S7;Q3TXH7;Q8R3R1;Q3U672	Q54AC6;P56394;Q3UJM3							Q8R050-2;Q8R050;Q8CCV1;Q8BPH0;Q3UL02	Q4FZE6;P62082;F6SVV1	Q99LX0;A2A813;A2A815	Q9QXW9							Q9R0H0-2;Q9R0H0;A2A848;Q8C168;Q8BW35	Q8CH18;Q8CH18-3	Q91V55;P97461;D3YYM6	D3Z0L4;Q9D9P1
	P45952;Q91WS8	Q3UM45							Q542X7;P80314;Q9JJD8	D3Z3A0;Q9DCL8;Q8BVM6;Q9CT86					E9QN52;Q91WK0-2;Q91WK0	Q3UFV9;Q91YW3;Q3UKA1	Q9CQ49;D3Z3D2	Q14DR9;Q8R2E9							B3V097;Q8BIQ5;Q8BIQ5-2;A2AEK1;B3V099	O88845;Q3TR91;O88845-3	Q66JR8	P60904;G5E8T0;A2AUE1;Q921J3							Q60951;Q3UBT1;P62960;Q71V06;Q810K5;Q60950	F8WI31;Q922V4;D3Z4V1	Q3U1S6;Q91W50;Q8JZN2;Q80TP8;Q3U4S7;Q3TXH7;Q8R3R1;Q3U672	Q80WJ7;F6QHD1;F6ZSG0
	Q8BUY5	Q58E65;Q3UI33;O08663;Q3TMN1							B1AU76;B1AU75;Q99MD9-2;Q99MD9	P61082;F7CDT0;F6WMC0					Q3TA59;F6Q269;D3Z1G6	Q8K2C7	A0A087WQS0;A0A087WQM0;E9Q0S6;A0A087WRU0;A0A087WQ94;Q3U0Q9;Q7TSV1	Q53WR6;Q61543;F8WHM5							Q8K1M3;P12367	Q99LX0;A2A813;A2A815	Q3UKV4;D3Z5N6;Q61103;F8WIP7	Q9EPN1-3;Q9EPN1-4;Q9EPN1							Q80X54;Q91YJ2	Q8C298;E9Q179;Q8C5Q4	Q3TCW5;Q99J45;D3YUV1	P62204;Q3UKW2;Q9D6P8
	Q3TUQ5;O35691;Q9CV89	A2A5Y6;P10637;P10637-6							Q7TMW1;Q6ZPH4;Q8C2E3;Q91YS2;P46061;Q3ULJ9	Q14AQ1;P62334;Q8QZS9					P54775;Q569X4;Q3TFA5;Q8BKU2;Q3TJ97;Q3UBF0;Q52L53	Q9JIK5;Q6PCP0;Q3ULC7;Q9CWZ5;Q8K2L4;Q9CSR3	Q3U9G2;P20029;Q3TWF2;Q3TKF8;Q3TI47;Q9DC41;Q3U7T8;Q3UEM8	F6UIS1;Q9CQE7;Q9CQE7-2;F6RK81							Q2M4J2;Q9Z1B3-2;Q9Z1B3-3;Q9Z1B3;Q6ZQ92;Q3UPW0	Z4YJU8;Q5DTL1;E9PUQ5;Q921M4-2;Q921M4	Q922H9;Q922H9-2	Q3UG80;Q8R307;Q69ZI9;Q8CFS5;Q8BLK7;Q3U7D9							Q8R050-2;Q8R050;Q8CCV1;Q8BPH0;Q3UL02	Q60865;Q3UFZ6	Q60973;A2AFI9;A2AFJ1;Q3UJI2;Q3UX53;Q8C5H3	Q6NZR5;Q3TW36;Q8CDP6;O70349;Q8R3X0;Q3TE28
	Q9CWU9	P62137;Q3U8W0;Q3TYF5							B2RUD2;Q811S7-2;Q811S7	P39054;Q3T9X3;F8WIV5;P39054-2;G3UZZ3					P14152	P37804	Q9JIK5;Q6PCP0;Q3ULC7;Q9CWZ5;Q8K2L4	Q8BJW6;Q8BJW6-2							Q8BGD8	P70333	O88845;Q3TR91;O88845-3	D3Z780;Q61749;Q61749-2							Q9ERT9	P17751;H7BXC3	Q7TQE2;Q8CBM0;Q3TCR9;Q62523;Q8CD55	Q9Z0W3;Q9Z0W3-2
	Q3THB3;Q9D0E1-2;Q9D0E1;Q3TW40;Q570Z0;Q3TQ66	Q3TUI3;Q8K2F0;Q05DR7;Q4G5Y4;Q5CCJ9;Q8K2F0-2;A2AKA9;Q53TY6							Q9JMH6-2;Q9JMH6	Q8C4B4;Q8C4B4-2					Q3UW40;Q8BP67;Q8BT08;Q9CS31	Q3UE99;A2RTI3;O89017	Q3UMT1	B9EIC7;Q8K0S0							Q99KQ9;Q9ES93;Q9R013;A4FUP7	Q66JR8	Z4YJU8;Q5DTL1;E9PUQ5;Q921M4-2;Q921M4	Q6PA06;E9QND8;Q8BYP9;Q6PA06-2							P34022;H7BX22;Q3U6M5	Q91V55;P97461;D3YYM6	F8WI31;Q922V4;D3Z4V1	Q8CAW4
	Q3U781;Q9D6W4;P84104-2;P84104;A2A4X6	G3UXL2;Q9D7G0;Q3TI27;Q3UPD5;Q3UYQ0							P50516;P50516-2	Q8C1A5					Q9D7S9	B7ZC46;B1AQY9;B1AQZ0;Q8CHH9;Q8CHH9-2;E0CYM4	Q9CYA0	O54781;Q8CBI1;Q8C9R8							Q68EF0	D3Z5M2;Q99LF8	D3Z5M2;Q99LF8	Q91YR7;Q91YR7-2							Q6P264;Q7TQJ3;Q9ER35	Q6PIP5	Q3UJ84;Q3U417;Q8C8U0;Q8C8U0-3;Q8C8U0-2	Q9JL35
	Q8CC21;Q8CC21-2;F7BCD5	F6Y616;Q8VE62;D3Z3J6;G3UYE5							Q99KF5;P00493	Q8BLI4					B2RRE0;Q9WTQ5;Q9WTQ5-2	Q3UIA4;Q9JHW9;Q810V9;G3UWP3;Q8R345	Q52L87;P68373;Q3TIZ0	Q60972							Q5F258;Q68FF6	Q68EF0	A2AQA9;A2AQB2	E9PYK3;Q6A0B1							Q6ZWX6	Q9JJL8	Q9JJL8	Q0VGN4
	Q8C1B7-3;Q8C1B7-2;Q8C1B7	Q3TWW8							Q9CQ60;Q8CBG6;D3Z4X1	B2RUK5;Q3ULD5;Q6PD20					Q5F2E7;Q5F2E7-2	Q9JKV1;Q8VCI8;D3YUD8	Q3UNI1;Q53Z05;Q923E4;A7MCT8;Q923E4-2	Q5SV64;Q3UH59;Q61879;Q80T68;Q4KMN4;Q8BLI1							Q9D0L8;Q9D0L8-2;Q9D0L8-3;D3YYS7;D3Z478	A2AQA9;A2AQB2	Q3UIJ2;Q3TML6;Q9Z0N1;Q3UDF8;Q9CRE9;Q3U5H6;A2AAW9	Q3THK3;Q8BVJ2							Q68EF0	Q7TQE2;Q8CBM0;Q3TCR9;Q62523;Q8CD55	Q8VE88-2;Q8VE88	A2RS22;Q9WUM3
	Q99JY0	Q9CWU9							Q543K9;P23492	Q9JKX6					Q9D037;Q9CQY3;Q9CPQ8	Q3ULB1;Q921W7;P47226-2;P47226;D6RH72;A2ALC6;Q3V085;B1AXB9	F6TCF9;Q60739-2;Q60739;Q9CUY1	A8IP69;P61982							Q810A7;Q810A7-2	Q4V9T8;P48024;Q3UBT8;J3QN87	Q4V9T8;P48024;Q3UBT8;J3QN87	Q3UNZ1;Q99J23;Q3TT56;Q3UXS5							Q9QZ83	Q3UJ84;Q3U417;Q8C8U0;Q8C8U0-3;Q8C8U0-2	P17751;H7BXC3	Q544H0;Q9Z1D1;Q3THA0
	O35295	Q811L7;Q8C2Q7;O35737							P80316	Q4VAG4;P67984					Q68EF0	P55937-1;P55937	Q9D1M7	Q3UNH4							Q5SW18;P63005;Q3UH92;Q3UGR6;Q3TJG1;Q3UHM0;P63005-2;Q3TIK0	Q3TDN8;Q8R164	Q91V55;P97461;D3YYM6	P11679							Q9CPQ1	Q8VE88-2;Q8VE88	A2ALR9;Q3V0C5;Q3V0C5-5;Q3V0C5-2;A2ALR8;Q3V0C5-4;Q3V0C5-3;B7ZNK5	Q91W34;D6RDS0;Q91W34-2
	Q5F285	Q62048;D3Z375;Q62048-2							D5MCW4;Q9CQ89	Q6A0D1;Q9CRD2					Q3ULL5;Q99L45	Q3UNI1;Q53Z05;Q923E4;A7MCT8;Q923E4-2;Q3USJ2;Q3USY7	P99027	Q3V0K9							Q3URU2;Q3URU2-2;Q0P5Y8	F8WI31;Q922V4;D3Z4V1	F8WI31;Q922V4;D3Z4V1	E9PV41;Q5DTQ4;E9PXV7;O08808;Q6NS79;D3Z074							Q3TJ01;Q99LF4	Q8BFQ8	Q60865;Q3UFZ6	E9Q7L3;D3Z1W6;E9Q7L2;D3Z1N4;E9Q4Y5;F8VQD1;Q8BSQ9-2;Q8BSQ9;D3YYF2;D6RIL0;D6RI94;D3Z3R4;F6THL5
	Q8BTV2-2;Q8BTV2	O54962							Q5HZY7;Q9CR51;Q3U7E0	Q8BMJ3					Q14AQ1;P62334;Q8QZS9	Q66JR8;Q9D0J8;Q8VHU9;Q80WS9;Q8VDQ2	O70251;A0A087WS46	Q62422							Q04750	Q9JJL8	Q9JJL8	P05132;P05132-2							Q921W4;D3YZD6;D3Z6I4;Q921W4-2;D3YU21;F7BGV1	Q5SW18;P63005;Q3UH92;Q3UGR6;Q3TJG1;Q3UHM0;P63005-2;Q3TIK0	Q3TDD8;Q3TSY9;Q8BGD9;Q3UGC0;Q3THB0;Q922K6;B2RWE8	Q8C292;Q8C1V4;Q3TIV6;Q99MN1;Q8CFK5
	Q3TQY2;Q8CBY8-2;Q8CBY8	P45952;Q91WS8							Q9CQX2;Q3TN44;Q3TH64	A0A087WRY3;Q80XU3					Q9WVA4	P54775;Q569X4;Q3TFA5;Q8BKU2;Q3TJ97;Q3UBF0;Q52L53	Q99KV1	Q8VCH8;Q3UFS2;Q05C23							Q3TJ01;Q99LF4	Q3UAT9;Q3U9N8;P24547;Q3UPJ2	Q3TDN8;Q8R164	Q8BU30							Q8BGD8	A2ALR9;Q3V0C5;Q3V0C5-5;Q3V0C5-2;A2ALR8;Q3V0C5-4;Q3V0C5-3;B7ZNK5	Q8C298;E9Q179;Q8C5Q4	P70336;P70336-2
	Q6P264;Q7TQJ3;Q9ER35	P67778;Q5SQG5;Q3TV00							P52480	O09131					Q8K009;D3Z6B9	Q8R2K1;D3YWS7;F6SJM7;Q8R2K1-2;Q8R2K1-3;Q8R2K1-5;Q8R2K1-4;F6X9P4	P63028;D3YU75	Q8VDN4;D3YUR9							Q3UYP2;Q3TVT6;Q9CQF9;Q99JK4	B9EKJ7;P58871;Z4YJL4	P70333	E9QB02;Q68FL6							A0A087WST2;Q8BX09-2;Q8BX09	Q3TCW5;Q99J45;D3YUV1	Q3U4U6;P80318;E9Q133;Q3U0I3;F6Q609	P47811;B2KF35;Q5U421;P47811-2;P47811-3;B2KF34
	P50428	P83917;Q7TPM0;Q9CYJ8							Q8BHC2;Q9CX00	Q3UWT6;P49722;Q9CZ58;Q8BKE0					Q5GQ64;Q9Z0F7	A2AT37;F6Q3G7;Q810R2	Q80W65	E9QNH7;Q5CZX6;Q5XG73-2;Q5XG73-3;Q5XG73							Q5D098;P70195	Q3THQ5;Q60864	Q3UAT9;Q3U9N8;P24547;Q3UPJ2	Q53WR6;Q61543;F8WHM5							P09411;S4R2M7	B9EHZ5;Q9JLB0-2;Q3UN60;Q9JLB0;Q6NSS8;Q811G2	Q66JR8	Q8BXA5
	Q811L7;Q8C2Q7;O35737	Q9D168							Q3ULH5;Q3TXW2;Q3TVV6;Q8VEK3;O88568;G3XA10;Q3TWN5;Q3TGN5;Q3TS50	Q4VAA9;Q8BP48;Q8R0B2					G3UYV7;Q059I1;P62858	Q9D1M7	Q8VEH8;Q9CWA6	Q6ZWQ6;P61087;Q3TL77;D3Z4U3							Q545F4;P14602-2;P14602;P14602-3;D3YZ06	Q99JY0	Q3THQ5;Q60864	H3BKT0;H3BJN3;Q6AXG1;Q9JJB6;H3BJ26;H3BLJ7							P60879-2	Q3U4U6;P80318;E9Q133;Q3U0I3;F6Q609	B9EHZ5;Q9JLB0-2;Q3UN60;Q9JLB0;Q6NSS8;Q811G2	B1AT03;Q3UC82;Q3U1F0;Q80ZH7;K4DI59;P97386-2;P97386;Q3TJN5
	S4R1M2;D3YXK2	Q8BTV2-2;Q8BTV2							Q3UWT6;P49722;Q9CZ58;Q8BKE0	Q3U3S0;P58404-2;P58404					Q9DCM0	Q5GQ64;Q9Z0F7	Q9D281	Q3TLE4;Q8BQ46;F6QCI0							Q99JF8;A2BI12;Q99JF8-2;Q05CD2	Q91V55;P97461;D3YYM6	Q5F258;Q68FF6	G5E8R4;Q922D4-2;Q922D4;Q922D4-3;Q922D4-4							Q5EBG8	Q04750	Q5SW18;P63005;Q3UH92;Q3UGR6;Q3TJG1;Q3UHM0;P63005-2;Q3TIK0	Q9DBS1
	Q8BTW9;Q8K0U2	Q9JLZ3;F6RT60;F6R307							Q4VAG4;P67984	E9Q3H7;E9Q0B6					A2AD03;Q3UR39;Q9QXG2;Q8CBI2	Q91V55;P97461;D3YYM6	Q9WVA4	Q9R190;Q3TZP3;Q3UDZ8							Q8K411-2;Q8K411;Q8K411-3	Q9R0H0-2;Q9R0H0;A2A848;Q8C168;Q8BW35	Q99JY0	D4AFX6;Q6ZQK5;Q6ZQK5-2							E9QB01;P13595-2;E9Q589;P13595-3;P13595-4	B9EKJ7;P58871;Z4YJL4	Q04750	Q6PA06;E9QND8;Q8BYP9;Q6PA06-2
	G3X9M0;Q9ER88;Q9ER88-2	D3Z1F7;Q9DBN4;D3YXF2;Q9DBN4-3;Q9DBN4-2							Q8C0Z3;Q8CFF2;Q8CGI3;Q9CT17;Q6NSR2;Q3UIX4;E9Q6E5;D3Z4B0;B7ZNC5;Q8BV04	Q91WK1					Q5M9L7;Q8BT90;P63276;Q3TK12	Q810V0;Q9D7V6;A0PJ89;Q8K0Z2;Q9CYN7	D3Z2U7;F6U9F5;F6Q346;F6W4F5;E9PWV9;D3Z7M6;F6QKL8;P27699-10;P27699-2;P27699-8;P27699-7;P27699-6;P27699-5;D3Z7P7;D3Z326;Q78Z98;F6VJ22;D3Z6A5;F6QWT6;P27699-11	Q8BJT9;Q8BJR2;Q91VV3;Q8BK85							Q5M9P7;Q9CR86;Q3UD53;Q3U434	Q922H9;Q922H9-2	Q9D287;Q05CL7;Q3U5M2	Q8VDD5;Q3UFT0							Q9CQZ1	Q3TDD8;Q3TSY9;Q8BGD9;Q3UGC0;Q3THB0;Q922K6;B2RWE8	A2AER7;Q91VJ5;A2AER8	Q8BH80;Q9QY76;Q3TU78;Q3TA54
	Q5EAT0;P49962;Q3UIK3;D3YZX8	G3X9M0;Q9ER88;Q9ER88-2							Q3U0F3;Q91VK4;A0A087WRM2	Q9CQX2;Q3TN44;Q3TH64					Q9R0H0-2;Q9R0H0;A2A848;Q8C168;Q8BW35	P63242;J3QPS8	P16254;A2AUM6	Q91V28;Q3UAG2;Q9DCD0;Q91YT9							P62196;Q99KR1;Q8K1K2	Q9D287;Q05CL7;Q3U5M2	B9EKJ7;P58871;Z4YJL4	Q8BM55;D3Z6S1;Q8BM55-3;Q8BM55-2							Q9CQ92;G3X9U9	G3X8Q0;O89090;A2TH11;O89090-2	Q6PIP5	Q8BIL5;Q8BIL5-2
	Q9Z204-2;Q9Z204-4;Q9Z204-3	Q3THB3;Q9D0E1-2;Q9D0E1;Q3TW40;Q570Z0;Q3TQ66							P61458	Q5M9N6;Q4VAF2;P61514;Q9CYW3;Q3TLC1;Q3U8M3					Q8BWT1;Q3UKH3	Q9CQ19	A2ASS6;E9Q8N1;E9Q8K5;A2ASS6-2	D3YWH4;D3Z6X7;Q9DBU0;D6RGM8;D3Z279							Q3TDD8;Q3TSY9;Q8BGD9;Q3UGC0;Q3THB0;Q922K6;B2RWE8	Q91VR5;Q922B8;Q3V1Z7	Q9R0H0-2;Q9R0H0;A2A848;Q8C168;Q8BW35	Q61112;Q61112-2							Q3UD26;O35593;Q9CSU2	P09411;S4R2M7	Q3U0V1	Q9DC51;Q3TJH1
	Q9D168	E9QJV4;A0PJ46;Q8K2Z2							G3X8T9;Q91WP6	P05063					B2RXW8;B2RXQ2;B8QI33	Q6ZWX6;Q9CV24	Q3ULL5;Q99L45	A1L3B8;P26516							Q5EBG8	Q6ZWZ6;P63323	G3X8Q0;O89090;A2TH11;O89090-2	Q3T9Z2;Q91Z53							Q91WQ3	Q3U0V1	B9EKJ7;P58871;Z4YJL4	Q91V28;Q3UAG2;Q9DCD0;Q91YT9
	A2A5Y6;P10637;P10637-6	P40142							Q5FW97;P17182	Q3THB3;Q9D0E1-2;Q9D0E1;Q3TW40;Q570Z0;Q3TQ66					Q8VDQ1;Q3TXN1;Q8VDQ1-2	Q4VA29;Q9CQE8;J3QNB0	P08003	Q8BMP6;Q6P9T6;Q3TJW1							Q3TPJ8;A2BFF7;A2BFF9;D6Q0F6;D6Q0F5;O88487;A2BFF8;D6Q0F7;A2BFF5;Q3UDA2	Q3TLQ4;P58064	Q6ZWZ6;P63323	Q8CCP0;Q8CCP0-2;Q8CCP0-3							P70158	Q3UJR8;Q64152-2;Q64152	P09411;S4R2M7	Q3U2X5;Q64133;Q3TPD9;Q3UJ53
	P83917;Q7TPM0;Q9CYJ8	Q9CSN1							O35127	Q14C26;Q9EP72					Q9D0J2;Q4FK74;Q9D3D9;Q9DCZ0	Q545X8;P62702;Q3UXQ6;Q545F8	F8WID5	Q3UUF0;Q8C541;O08914;Q8BRM1							Q8BGT7;Q3TGV3	Q5F258;Q68FF6	Q64737;Q3UJP8;Q3TH49;Q64737-2	Q9JMG2							G3UVU2;Q7TN25;D3YW09;Q62203	O55222	G3X8Q0;O89090;A2TH11;O89090-2	Q8VCF0;Q3U5B1
	Q4FJN2;Q64378;Q3TX72	Q3TYX5;L7N466;Q9D110;B2KF83;Q8R1G5							Q91WK1	Q8BJF9					F8VQJ3;P02468	Q3U8Y7;Q3TKG4;O88685;Q3TKC2;A2AGN7;B7ZCF1;A0A087WPH7;Q3UD94;F6Q2E3	Q9JKR6	Q3TIR3							Q60865;Q3UFZ6	G3X8Q0;O89090;A2TH11;O89090-2	Q3TLQ4;P58064	Q8C4N0;Q91WR9;Q3TMN9;Q9JJK5;Q6A0E4							E9QML5;Q61464-4;Q61464;E9QKZ7;Q61464-7;Q61464-2;Q61464-5;Q3TNM0;Q3TZK9;Q3TQM2;Q3TQ35	Q66JR8	O55222	B2RSW8;Q9R0L6;Q9R0L6-2
	Q8C0M9	B7ZCL8;Q542P4;P70290;Q684Q6;A2AN84;B7ZCL9							A2RSV8;P19783	Q544Z3;Q99020;Q9D6G1;Q80XR6;Q3TMZ8;Q20BD0					Q9D828;Q9Z1A1;Q8C2C6;F6QJV5;B8JJG7;B8JJG8;B8JJG6	Q9D281;D3Z2J2	P50544;B1AR28;Q3UJR6	Q9JKK7;Q9JKK7-2							Q8K009;D3Z6B9	Q64737;Q3UJP8;Q3TH49;Q64737-2	Q5U438;Q5SQB7;Q61937;Q9DAY9;Q5SQB5;Q5BL09;Q3U536;Q8BSZ3;E9Q5T3	Q5SUH7;Q3UPG6;Q99KN9;Q3UGL3							Q6ZQ47;Q3UYC8;A2BDX0;Q5BL11;Q5RKY4;Q9Z103	Q8CE80;P51125-3;P51125-2;P51125-6;P51125;Q921U7;Q8C281;P51125-7;Q8CE04;Q8CB83	O08749;Q3TIE8	Q99K01-2
	Q3UZ63;Q3UL31;Q6NZF1;Q3TIV2	Q8C0M9							Q9Z2H7	Q9D2D1;Q544R6;G3X8T3;P16675					Q1HFZ0;H3BKN0;Q1HFZ0-2	Q9D7S9	Q3UQ26;A2AI52;Q80U87;Q3UZ62;Q58E42	Q91YH5;E9PYT3;Q91YH5-2							P70122;F6TN03	Q5U438;Q5SQB7;Q61937;Q9DAY9;Q5SQB5;Q5BL09;Q3U536;Q8BSZ3;E9Q5T3	Q91VR5;Q922B8;Q3V1Z7	Q8BZS9-2							P31324	O08749;Q3TIE8	Q99LX0;A2A813;A2A815	O89116
	E9QJV4;A0PJ46;Q8K2Z2	B1AU25;Q9Z0X1;Q2QKE3							Q9QZX7-2;Q9QZX7	Q9CQ60;Q8CBG6;D3Z4X1					Q9CWJ9	A0A087WQS0;A0A087WQM0;E9Q0S6;A0A087WRU0;A0A087WQ94;Q3U0Q9;Q7TSV1;Q9DBT6;Q7TPM8;Q8C6V6;A0A087WP40;A0A087WSC8;Q8C323;A0A087WPC7;A0A087WS32	Q3TV94;Q52PE3;Q9CY50	Q3USC7;Q8VE33;A2A5H8							Q9CQ92;G3X9U9	E9PW20;Q9CY57-3;Q9CY57;B7ZMS6;Q2VPR3;Q9CY57-5;Q9CY57-4;Q9CY57-2;D3YZA1;D3Z7T7	Q5HZY7;Q9CR51;Q3U7E0	E0CXW2;E9PUK2;Q80V03-2;Q80V03							Q3U6D7;O55100-2;O55100	A2AER7;Q91VJ5;A2AER8	Q3UJR8;Q64152-2;Q64152	Q3UKU3;Q9NWG9
	Q3TWW8	Q3TXI9;Q3TWF3;Q53ZT3;P12023;Q3TVS1;Q6GR78;P12023-2;P12023-3							Q3U7Z6;Q9DBJ1;Q6NWV5	Q7TQE2;Q8CBM0;Q3TCR9;Q62523;Q8CD55					Q9JHL1;Q9JHL1-2	Q6P1B9;O08539-2;O08539	Q8C292;Q8C1V4;Q3TIV6;Q99MN1;Q8CFK5	Q8BGC0							Q9D0J2;Q4FK74;Q9D3D9;Q9DCZ0	Q545F4;P14602-2;P14602;P14602-3;D3YZ06	A2AER7;Q91VJ5;A2AER8	G3X9K3;D3YYK9							E9Q4Q2;D3YZC9;D3YZD0;Q3UK67;Q3UI45;Q64213-2;Q64213-3;Q64213;Q3TZI3;D3YVH4	Q99LX0;A2A813;A2A815	Q8BGT7;Q3TGV3	Q8C0E2
	A2RSV8;P19783	Q9DBP5							Q9DC36;Q8CDE0;Q5SS83;Q3UEG9;Q60634-3;Q60634-2;Q60634	P61458					P62196;Q99KR1;Q8K1K2	Q3UQ26;A2AI52;Q80U87;Q3UZ62;Q58E42;Q3TQM7	D3YUW7;E9QMC1	Q9CWZ3-2;A0A023T672;Q9CWZ3							Q6NXZ0;Q3UDD5	Q3UDM8;Q8VEE0;B2KGF0	Q3UDM8;Q8VEE0;B2KGF0	Q8BRM2;A0A087WQS3							O88967	Q8BGT7;Q3TGV3	A2A7Z4;Q78IG7;Q9CQH7	Q9D7N9
	O54962	D3YWX2;E9Q803;F6YTL8;Q9R0I7							Q9D823	Q91ZZ3					G3X9L6;Q9DCX2;B1ASE2	Q3U9G2;P20029;Q3TWF2;Q3TKF8;Q3TI47;Q9DC41;Q3U7T8;Q3UEM8;Q3TUS2;O88687	Q4V9T8;P48024;Q3UBT8;J3QN87	Q9CZ22;A2AUD5;Q9CYZ2;Q3TAI4;V9GWU5							B2RSN3;Q9CWF2;Q99J49	Q3U741;Q501J6;Q3TU25;Q501J6-2	Q3U741;Q501J6;Q3TU25;Q501J6-2	Q543B9;Q9QUR6;Q3TCS0;Q8C6A3;Q3TQ97							Q3TVI6;Q3TGG0;Q8K3G9;Q3TB15;Q3U3Y3	A2A7Z4;Q78IG7;Q9CQH7	Q5M9N5;Q5M9J8;P41105	Q8BYU6
	Q58E65;Q3UI33;O08663;Q3TMN1	Q8BGH2							P09411;S4R2M7	B2CY77;P14206					P62073	A2ASW4;Q9EQZ6-3;Q9EQZ6;A2ASW8;Q571A8;Q9EQZ6-2;Q9CS95	Q8C2D1	Q3ULL6;Q80UI8;Q149I6;Q9CS15							Q6ZWX6	Q6P264;Q7TQJ3;Q9ER35	Q8BJW6;Q8BJW6-2	D3Z2U7;F6U9F5;F6Q346;F6W4F5;E9PWV9;D3Z7M6;F6QKL8;P27699-10;P27699-2;P27699-8;P27699-7;P27699-6;P27699-5;D3Z7P7;D3Z326;Q78Z98;F6VJ22;D3Z6A5;F6QWT6;P27699-11							F8VQ28;Q8VI36-2;Q8VI36;Q3UG90	Q9D287;Q05CL7;Q3U5M2	Q8CE80;P51125-3;P51125-2;P51125-6;P51125;Q921U7;Q8C281;P51125-7;Q8CE04;Q8CB83	A0ELI5;Q8K2D3
	Q9EQC8;Q05CA9	P68372;Q9CVR0;Q9DCR1							Q9Z130	Q3TPU5;O70378;Q8C988;Q3TTC9;M0QWY0;M0QWP2					Q03265;D3Z6F5	Q04750;Q3TSR2;Q3ULF5;Q6LBJ1;Q3TPX7;Q3TUS4;Q569Q5;Q9D6H0;Q8R4U6	Q9ESP1	Q6P1B9;O08539-2;O08539							Q99LB6	P61164	Q5GQ64;Q9Z0F7	Q8BHE8							Q059U9;Q9DBR0	Q5M9N5;Q5M9J8;P41105	Q9D287;Q05CL7;Q3U5M2	Q3UQM7;Q9Z127;Q3UG45
	Q3TYX5;L7N466;Q9D110;B2KF83;Q8R1G5	Q5EAT0;P49962;Q3UIK3;D3YZX8							D3Z3A0;Q9DCL8;Q8BVM6;Q9CT86	Q8C0Z3;Q8CFF2;Q8CGI3;Q9CT17;Q6NSR2;Q3UIX4;E9Q6E5;D3Z4B0;B7ZNC5;Q8BV04					Q8BGD8	Q3UMT1	Q8C6E3;Q542K4;Q3UZE7;Q3TVZ1;P24270;Q3UF58;Q91XI2	P28740-2;E0CZ72;P28740;P28740-1							Q542Y0;Q64669;Q99KL8	Q5GQ64;Q9Z0F7	Q545F4;P14602-2;P14602;P14602-3;D3YZ06	H3BK48;H3BKH2;E9Q3S2;H3BJS0;Q8R311;H3BL19;Q3TZZ3;H3BJI6;H3BK44;E9PY90;H3BKL6;H3BJ71							Q5HZY7;Q9CR51;Q3U7E0	Q5F258;Q68FF6	Q5F258;Q68FF6	Q8BFW6
	B7ZCL8;Q542P4;P70290;Q684Q6;A2AN84;B7ZCL9	Q3UBP6;Q3UBQ4							Q60932-2;Q3U6K8;Q3TIG8;Q3THL7;Q60932;F2Z471	Q9D1R9					Q3TGU7;P50580;Q05BN2;Q3UMW2;D3YVH7	A2RSB1;B7ZNL2;Q8C1W9;Q78ZA7	B9EKJ7;P58871;Z4YJL4	Q9DBS1							P60335	A2AEX8;A2AEX6;P97447;A2AEX7;A2AEY1;A2AEY2;P97447-2	Q3UIG8;Q9JIF0-2;Q8C2D7;Q3TPF5;Q80WB1;Q80WV6;Q9JIF0-3;Q9JIF0;D3Z0A2;F8WH01;D3Z3N0;Q9CX58	Q544F6;Q9CQI6							P62196;Q99KR1;Q8K1K2	P70670;Q60817;Q3UK68	P70670;Q60817;Q3UK68	Q8BHD7
	P68372;Q9CVR0;Q9DCR1	S4R1M2;D3YXK2							D3Z7X0;D3Z2B3	Q99LB4;Q3UJ44;D3YTL5;Q3TNN6;P24452;D3YZN3;D3YU77					Q8CGA0	Q60951;Q3UBT1;P62960;Q71V06;Q810K5;Q60950;A2BGG7;B2RUF0;Q9Z2C8-2;Q9Z2C8;Q8BRJ5;Q497N3;Q9CTL4	Q8VE47;F6VRI6	Q8BI84;Q8BI84-2							Q5U438;Q5SQB7;Q61937;Q9DAY9;Q5SQB5;Q5BL09;Q3U536;Q8BSZ3;E9Q5T3	A2AER7;Q91VJ5;A2AER8	Q6P264;Q7TQJ3;Q9ER35	Q6P8M1-2;Q6P8M1							D3YWX2;E9Q803;F6YTL8;Q9R0I7	P70333	Q3UYP2;Q3TVT6;Q9CQF9;Q99JK4	Q9CPS8
	P40142	Q3UD26;O35593;Q9CSU2							Q91WU5	Q561N5;F6YVP7;P62270;S4R1N6;Q3TW65					Q9D7X8	Q99KV1	Q3UHY8;P61222;Q6NXX7;Q3TJM9;Q3TIU8	F8VQC1;Q3UZL8;A0JLN1;E9Q740							Q8C570;Q8CBU3	Q8BJW6;Q8BJW6-2	E9PW20;Q9CY57-3;Q9CY57;B7ZMS6;Q2VPR3;Q9CY57-5;Q9CY57-4;Q9CY57-2;D3YZA1;D3Z7T7	Q8CBB7;Q3UKX8;P22892;Q8CC03							Q564E5;Q3V244;Q9WUK2;Q3TG58;Q9WUK2-2;Q80U88	Q3UAT9;Q3U9N8;P24547;Q3UPJ2	Q3UAT9;Q3U9N8;P24547;Q3UPJ2	Q8BMA6;A2AAN2;Q8K258
	B9EKE9;Q3TQX5;Q62167;B7ZWF1;B9EIA2;P16381	Q3TQY2;Q8CBY8-2;Q8CBY8							Q60668-3;Q60668;Q3UXC8	Q9CPR1;H3BJN8					E9Q983;Q8K4L2;E9Q3Z5;Q8K4L3;E3VVQ8	Q52L87;P68373;Q3TIZ0	Q9QXT0	Q9JHH9;Q9CTG7;F2Z4A2							E9QKR1;J3QNM3;E9QKQ9;E9QLZ9;Q03173-6;Q03173-3;Q03173-4;Q03173-5;Q03173	Q3UBA6;P63017;Q3U9L2;Q3TEK2;Q504P4;Q3TRH3;Q3TQ13;Q3ULM1;Q3TH56;Q3TZJ3;Q3KQJ4;Q3UDS0;Q3TH04;Q3TB63;Q3UXU1	P61164	A0JNY7;Q62448;G3XA17;Q62448-2;F7CBP1;Q3U9U9							Q9R0P4;D6RI64	Q3URU2;Q3URU2-2;Q0P5Y8	Q3URU2;Q3URU2-2;Q0P5Y8	D3YXZ5;Q91WT8;Q91WT8-2;D3Z113
	Q5HZY7;Q9CR51;Q3U7E0	Q8BTW9;Q8K0U2							Q3UN87;P27048;P63163;O70499	E0CY18;A0A087WPF5;Q91X58					Q3UBU9;Q62446	Q5M9L7;Q8BT90;P63276;Q3TK12	Q8R3D5;P57016	Q9D517;C4B4E7;Q3TXT9							Q8K2H2	Q04750	Q04750	B7ZWC4;Q07113;B9EKB8							Q8CAJ7;Q3U3I6;Q3TVK3;Q9Z2W0;Q8BPW9	Q5M9P7;Q9CR86;Q3UD53;Q3U434	Q5M9P7;Q9CR86;Q3UD53;Q3U434	O35598;E9PYF2
	B1AU25;Q9Z0X1;Q2QKE3	Q544Y8;Q3UC19;Q3TVQ3;Q3U9K2;Q9D2V3;Q3UD85;Q3UAJ3;Q3U9N4;Q3U8W3;Q3TW77;P28798;Q3UDD6;Q3TX66;Q3TWT4;Q3U5Q6							E9Q4D5;Q8VEL9;Q8VEL9-2	P99026					Q9JJL8	Q3V1M8;Q3U4Z7;Q8VDJ3;A0A087WP83;Q8BX68;A0PJE9;A0A087WS92;A0A087WPC5;A0A087WQY9;A0A087WPH2;A0A087WNQ4	Q9Z2Q6;B7ZNM7;Q52KH2	F6QUA9;Q3U3T9;Q60949-2;Q60949;E9Q6L4;Q3TNW7;Q3TXH9							G3UVU2;Q7TN25;D3YW09;Q62203	F8WIG4;Q3TI08;Q3TY03;Q62384;F8WHU9;Q9JJA1;Q3TIH8;Q9CUE2;Q8C8U3	Q3UYP2;Q3TVT6;Q9CQF9;Q99JK4	Q14BR4;P61750;Q9DD04;E9Q798							G3UYV7;Q059I1;P62858	P48722;P48722-2;E0CY23	P70333	Q99LD8;O08972
	A2AD03;Q3UR39;Q9QXG2;Q8CBI2	A2RSV8;P19783							P97930;Q6GRA7;P97930-2	Q3UTI7;Q9QUR7					Q3UK83;Q3U7F3;Q3TIK8;Q5EBP8;P49312;Q3TFB1;P49312-2	B7ZN44;A5CVE4;I1E4X8;B2RQE3;P83093;Q8BIM2;F6WBP9	Q3TQR3;P59325;Q3TKY2;Q8BVV6;Q05CM5;Q05CH7;Q3TT65;Q6PHA6;Q05C65	Q3UIJ2;Q3TML6;Q9Z0N1;Q3UDF8;Q9CRE9;Q3U5H6;A2AAW9							Q3UIG8;Q9JIF0-2;Q8C2D7;Q3TPF5;Q80WB1;Q80WV6;Q9JIF0-3;Q9JIF0;D3Z0A2;F8WH01;D3Z3N0;Q9CX58	Q3UIG8;Q9JIF0-2;Q8C2D7;Q3TPF5;Q80WB1;Q80WV6;Q9JIF0-3;Q9JIF0;D3Z0A2;F8WH01;D3Z3N0;Q9CX58	Q8VE22;F7ARZ1;Q3TI14;Q3THH3;Q99LZ4;Q5SXC9;A7M7Q8	Q80WW9							O88291;D3YXQ7	Q6ZWZ6;P63323	Q3TET1;Q3UI47;B1AQZ2;P28741;Q80UK1;Q3TSP1;Q3TTS7;Q8CGJ1	A2ASW4;Q9EQZ6-3;Q9EQZ6;A2ASW8;Q571A8;Q9EQZ6-2
	Q9JHQ5;Q8CDG8;Q3UHL8;F6VG18;F6VTH5	P50428							Q03517	Q8BTX9					Q545X8;P62702;Q3UXQ6;Q545F8	Q80W65;Q5PYH4	Q80ZP8;Q3TMX5;A8C1V1;Q9CXI5;F6USD5;F6T4L3;E0CXA8	Q542I9;P62192							Q9CSS1;E9PZM7;Q6ZPE9;Q7TML8	Q5HZY7;Q9CR51;Q3U7E0	Q91V47;Q3UK94;Q684Q9;P21126;B2M0S0;B2M0R9	Q3ULL6;Q80UI8;Q149I6;Q9CS15							Q8BGT7;Q3TGV3	Q3UYP2;Q3TVT6;Q9CQF9;Q99JK4	Q3UDM8;Q8VEE0;B2KGF0	P50543
	B7ZP16;H7BWY3;Q3UEG6	Q9Z204-2;Q9Z204-4;Q9Z204-3							Q9ERB0	Q3TKM9;Q9CPW4;Q3UC32;Q3UA72;Q3TK56					Q3TYA4;Q8R3T5	P08003	Q9D1M0	B2RSW8;Q9R0L6;Q9R0L6-2							Q3TYA4;Q8R3T5	Q6ZWZ4;Q5M9L1;P47964	Q3UBA6;P63017;Q3U9L2;Q3TEK2;Q504P4;Q3TRH3;Q3TQ13;Q3ULM1;Q3TH56;Q3TZJ3;Q3KQJ4;Q3UDS0;Q3TH04;Q3TB63;Q3UXU1	F6RPJ9;Q8CGB9;Q9JHR7							Q5FWJ9;Q3UDG5;Q3U2X1;Q3TFE2;Q63850;Q3UGJ7;Q3THR9	Q8VDP4	Q6ZWZ6;P63323	Q8CBP1;Q8C762;Q3TJI7;Q04736;D3YZ57;P39688-2;P39688
	Q9CZL5	Q5HZY7;Q9CR51;Q3U7E0							Q7TQE2;Q8CBM0;Q3TCR9;Q62523;Q8CD55	Q7TMM9					O70194	P63028;D3YU75	Q6PEM5;Q5D0B0;Q6ZY49;Q52KI7;Q3TL96;Q8K295;P55302;Q6PB52;Q8C252	Q9QXB9							Q059U9;Q9DBR0	Q91V47;Q3UK94;Q684Q9;P21126;B2M0S0;B2M0R9	O88291;D3YXQ7	A0A087WQS2;Q9CQC6;A0A087WPF9							P48678;P48678-2;P48678-3	Q3TET1;Q3UI47;B1AQZ2;P28741;Q80UK1;Q3TSP1;Q3TTS7;Q8CGJ1	P48722;P48722-2;E0CY23	Q6P289;Q571M5;Q8C863;Q8C863-2
	Q9DBP5	B2RQ68;B7ZW89;Q8R4U7							Q58EV5;P63158;Q8C7C4;Q8BNM0;Q6P202;Q497Z6;Q8BQ02;Q3UBK2;Q3UJK0;D3YZ18	Q8R1Q3					Q99KQ9;Q9ES93;Q9R013;A4FUP7	Q8C2D2;P70362;Q9CWQ7;Q9CZJ3;E9Q0Y6;E9Q475;E9Q646	O08795-2;Q3U518;O08795;Q3TWG2	Q5KU03;E9QAQ5;Q9WV60							Q9D287;Q05CL7;Q3U5M2	Q3UYP2;Q3TVT6;Q9CQF9;Q99JK4	Q9CQ92;G3X9U9	Q9JLJ1							Q5SW18;P63005;Q3UH92;Q3UGR6;Q3TJG1;Q3UHM0;P63005-2;Q3TIK0	A2AEX8;A2AEX6;P97447;A2AEX7;A2AEY1;A2AEY2;P97447-2	Q8VDP4	Q9CY58;Q3UJK2;Q9CY58-2;Q3UMP4;Q3UEI6;Q9CY58-3;Q3V274;Q9CY58-4
	Q3UD26;O35593;Q9CSU2	Q059U9;Q9DBR0							Q922D8;Q3TW74;Q3UZH3;Q8BXX7	Q3UC10;Q3ULG5;Q542I2;P97311					Q6ZWZ4;Q5M9L1;P47964	Q9D0J2;Q4FK74;Q9D3D9;Q9DCZ0;D3Z7S4	Q3TW51;Q78PY7;Q3UZI3;Q3TRW3	Q4FJX4;P97315							D0EW11;Q8K5B2;Q99KV4;D3Z6A4;D3Z1G3	O88291;D3YXQ7	A2AEX8;A2AEX6;P97447;A2AEX7;A2AEY1;A2AEY2;P97447-2	E9QKE4;Q8BMG7							Q60865;Q3UFZ6	Q3UDM8;Q8VEE0;B2KGF0	Q3TPJ8;A2BFF7;A2BFF9;D6Q0F6;D6Q0F5;O88487;A2BFF8;D6Q0F7;A2BFF5;Q3UDA2	Q99KN2
	Q9CSN1	P68040							Q14AQ1;P62334;Q8QZS9	Q99J21;Q99J21-2					Q3V038	Q3U1S6;Q91W50;Q8JZN2;Q80TP8;Q3U4S7;Q3TXH7;Q8R3R1;Q3U672;Q05C63;Q3UJ74	Q91V38;Q3UAD6;P08113;Q3UBU0;Q3TUD6;Q8CCY5;F7C312	Q3U2F9;Q3THF3;P29387							P48678;P48678-2;P48678-3	Q8VE22;F7ARZ1;Q3TI14;Q3THH3;Q99LZ4;Q5SXC9;A7M7Q8	Q6ZWZ4;Q5M9L1;P47964	F6QUA9;Q3U3T9;Q60949-2;Q60949;E9Q6L4;Q3TNW7;Q3TXH9							Q3V038	Q3TPJ8;A2BFF7;A2BFF9;D6Q0F6;D6Q0F5;O88487;A2BFF8;D6Q0F7;A2BFF5;Q3UDA2	Q922H9;Q922H9-2	Q3UMJ4;Q8R0A0
	H3BJ30;H3BJW3;Q6NVF9	B2RRE0;Q9WTQ5;Q9WTQ5-2							Q7TMM9	Q3UNN4;Q3UPK0;Q3UMX0;P97496-2;P97496;D3Z1X8					Q8QZZ7;G3X9K8	D3Z2U7;F6U9F5;F6Q346;F6W4F5;E9PWV9;D3Z7M6;F6QKL8;P27699-10;P27699-2;P27699-8;P27699-7;P27699-6;P27699-5;D3Z7P7;D3Z326;Q78Z98;F6VJ22;D3Z6A5;F6QWT6;P27699-11;Q9CQ87;Q3TTH6;D3Z773;D3Z4K8;D3Z0R0;F6RB97;D3Z011;D3YXV5;E9PV35;F6XRJ7;P27699-4;P27699-3;P27699-9;P27699;D6RFR5;D3Z0B6;D3YVP3;Q9D599;Q9D4U3	P32020;P32020-2	Q3TVW1;Q8R1X6;D3Z3F8;Q8R1X6-2							E9Q983;Q8K4L2;E9Q3Z5;Q8K4L3;E3VVQ8	Q9CQ92;G3X9U9	O54988	Q3THE2							P70670;Q60817;Q3UK68	Q3UW40;Q8BP67;Q8BT08;Q9CS31	Q3UW40;Q8BP67;Q8BT08;Q9CS31	Q4FK49;Q9D819;Q8BTY3;Q3UA53
	Q3TDD8;Q3TSY9;Q8BGD9;Q3UGC0;Q3THB0;Q922K6;B2RWE8	B9EKE9;Q3TQX5;Q62167;B7ZWF1;B9EIA2;P16381							Q544Z3;Q99020;Q9D6G1;Q80XR6;Q3TMZ8;Q20BD0	D3Z0F5;Q3UIT2;O88545					P56480	F6TCF9;Q60739-2;Q60739;Q9CUY1	A0AUN0;Q4G0C0;G3X928	Q6GQT9							Q4FK11;Q3UM20;Q3TF40;Q99K48;Q3TTV7;Q3TFC2	Q3TGU7;P50580;Q05BN2;Q3UMW2;D3YVH7	Q3TGU7;P50580;Q05BN2;Q3UMW2;D3YVH7	Q544T7;P45700							Q8C570;Q8CBU3	D3Z5M2;Q99LF8	D3Z5M2;Q99LF8	Q6R891
	Q922Z3;Q3UPJ8;Q3TK29;Q9CQN1;Q922R9;Q3TSG8	Q3TDD8;Q3TSY9;Q8BGD9;Q3UGC0;Q3THB0;Q922K6;B2RWE8							Q8CCI5	Q3THA6;Q8BL97-3;Q8BL97-4;Q8BL97-2;Q8BL97					P32020;P32020-2	Q9CYA0	Q58DZ3;P62889;Q497D7;Q5PR15	A3KGQ6;Q9D898							Q3U102;Q925F2;Q05CZ9;D3Z5Y0	O54988	Q9QUM9;E0CXB1	Q3TYS4;Q9D662;Q3TAW4;Q3UKB4;Q3TIS3;Q8CDS4							Q64737;Q3UJP8;Q3TH49;Q64737-2	Q91VE6-2;Q91VE6	Q52L97;P52293;Q641N9;A2A600;A2A601	O08795-2;Q3U518;O08795;Q3TWG2
	Q9D2D1;Q544R6;G3X8T3;P16675	Q3U647;Q60967;Q6NZM8;Q3TUA8							Q3TDX2;Q8VEJ9	Q9Z130					Q3TC93	P99027	P62843;Q3UK70;Q3UXS6	P14576							Q8QZZ7;G3X9K8	B3V097;Q8BIQ5;Q8BIQ5-2;A2AEK1;B3V099	F8WIG4;Q3TI08;Q3TY03;Q62384;F8WHU9;Q9JJA1;Q3TIH8;Q9CUE2;Q8C8U3	Q8C561-2;Q8C561;Q8C561-3							Q8C1B7-3;Q8C1B7-2;Q8C1B7	Q52L97;P52293;Q641N9;A2A600;A2A601	A2AEX8;A2AEX6;P97447;A2AEX7;A2AEY1;A2AEY2;P97447-2	Q3UA32;Q6PB93;Q3UM52;Q6PB93-2
	Q91X52;A2AC16	O88967							Q3UC10;Q3ULG5;Q542I2;P97311	Q9D823					Q3UBA6;P63017;Q3U9L2;Q3TEK2;Q504P4;Q3TRH3;Q3TQ13;Q3ULM1;Q3TH56;Q3TZJ3;Q3KQJ4;Q3UDS0;Q3TH04;Q3TB63;Q3UXU1	D3Z5M2;Q99LF8	Q3UPL0;Q3UPL0-2	F8VPU2;Q8K2R0							Q3U9V4;P62880;E9QKR0;D3YZX3;D3Z1M1;D3Z1T4	Q6PIP5	Q6NXZ0;Q3UDD5	Q80WQ2;Q8CCX6;Q8C907							F8WIG4;Q3TI08;Q3TY03;Q62384;F8WHU9;Q9JJA1;Q3TIH8;Q9CUE2;Q8C8U3	Q3TF14;P50247;Q3U4D1;Q5M9P0;Q3U5U5;Q8BPI7	Q91VE6-2;Q91VE6	Q9DBR7;Q9DBR7-2
	Q3UBP6;Q3UBQ4	Q5RL79							Q3TPU5;O70378;Q8C988;Q3TTC9;M0QWY0;M0QWP2	O35127					Q8C2Q8;Q9D9D7;Q3UD06;Q91VR2;A2AKU9;Q9ERA8;A2AKV2;A2AKV3;A2AKV1	D0EW11;Q8K5B2;Q99KV4;D3Z6A4;D3Z1G3	P31230;Q3UZG4;Q8C2U7	Q80U44							Q58EU1;Q8BWU5;Q3UQ67;E9QMF4;E0CYN9	O55222	B3V097;Q8BIQ5;Q8BIQ5-2;A2AEK1;B3V099	Q8VCT3;E9PYF1;Q8BMH2							Q9D287;Q05CL7;Q3U5M2	Q922H9;Q922H9-2	Q3TF14;P50247;Q3U4D1;Q5M9P0;Q3U5U5;Q8BPI7	Q3U5X7;Q3TXN3;Q921V5;Q3TBY6
	B2RRE0;Q9WTQ5;Q9WTQ5-2	Q5F285							Q99K28;Q99K28-2	Q3U3H9;P61963;Q80ZU1					Q9CQ49;D3Z3D2	G3UYV7;Q059I1;P62858;J3QNN8	Q5NC81;P15532;Q5NC80	P63254;Q8C2N7;Q6P3B4							Q564E5;Q3V244;Q9WUK2;Q3TG58;Q9WUK2-2;Q80U88	Q9QUM9;E0CXB1	O55222	Q91WG4;Q91WG4-2							Q99J77;Q9JJH0;Q3TFB5	Q3TAH3;Q9CPP0	Q6ZWZ4;Q5M9L1;P47964	Q14BR4;P61750;Q9DD04;E9Q798
	D3YWX2;E9Q803;F6YTL8;Q9R0I7	Q58E59;Q9D554							Q9CPR1;H3BJN8	B7ZCU2;B7ZCU5;Q3TPY5;Q3TMI0;Q6AXD3;B7ZCU4;B7ZCU3;Q3TJR5;Q3TJ64;B7ZCU0;J3QNK8;Q8CBW3-5;Q8CBW3-2;Q8CBW3-4;Q8CBW3-3;Q8CBW3;Q3UAH6					Q99KD6;Q3UDK5;E9PZS8;Q61387;Q3U7R2	Q9ESP1		B8X349;Q58A65-2;Q58A65;Q58A65-5;Q58A65-6;E9PUD1;Q58A65-3;Q58A65-4;F6SH61;Z4YMB8							Q9CZX8;Q5M9P3;D3YUT3;D3Z722;D3Z5R8;D3YUG3	Q5M9N5;Q5M9J8;P41105	Q8VDS4	A2AJH3;Q3THR4;O70311;Q8CFK1							Q3THQ5;Q60864	Q6ZWZ4;Q5M9L1;P47964	O88845;Q3TR91;O88845-3	Q8VDS8-3;Q8VDS8;Q8VDS8-2;D3YY98
	Q8C5R8;Q32M04;Q9CVZ1	P62627;A2AVR9							Q4VBX4;Q9D2M8;A6X925;Q9D2M8-2	Q9ERB0					Q3U1S6;Q91W50;Q8JZN2;Q80TP8;Q3U4S7;Q3TXH7;Q8R3R1;Q3U672	Q9CQ49;D3Z3D2		A2VDG1;Q8CJG1;Q8CGU0;Q8BJP2;H3BJ70							O70251;A0A087WS46	Q6NXZ0;Q3UDD5	P63242	O70423;O70423-2;A2A4I8							Q3U741;Q501J6;Q3TU25;Q501J6-2	O88845;Q3TR91;O88845-3	Q3UHW2;Q3TT11;P51660	P14576
	Q8BTI8-3;Q8BTI8;Q8BTI8-2	Q9EQC8;Q05CA9							B2RXY7;P48758	Q545K4;Q3UBJ6;Q3UA13;Q3U818;Q3U740;O55135;Q9R071					Q9QZ83	Q9WVA4		E9PU87;F6S7W6;Q6P4S6;F6U6U5;F6U8X4;Q6P4S6-2							Q8CAJ7;Q3U3I6;Q3TVK3;Q9Z2W0;Q8BPW9	Q9CPQ1	Q5M9N5;Q5M9J8;P41105	Q80X48;Q99P88;Q3UL43;Q6ZQ45;Q8BUA6							P60335	Q3TLQ4;P58064	Q3U9V4;P62880;E9QKR0;D3YZX3;D3Z1M1;D3Z1T4	Q3UDP8;Q9JJZ4;F6SPK0;Q3TV38;B1AWT7
	O88569;O88569-2;O88569-3;B7ZP22	Q9QZD9;Q3T9Y8							Q3THB3;Q9D0E1-2;Q9D0E1;Q3TW40;Q570Z0;Q3TQ66	Q545V3;Q3UJ20;P17183;D3Z6E4;Q922A0					Q3THE7;A7VL18;Q9JLJ2;Q3UDG0;Q3TMT4;Q3V1N7;Q3U367;Q3TG52	Q9JKR6;Q8VCI2;E0CYZ2;F6TRP3		G3XA66							Q5SUR3;Q9WTX5;Q3TL58	Q8VDS4	Q9CPQ1	Q9D8V7;Q8BM48							Q5SUT0;Q3UI30;Q6NVA3;Q5SUS9;Q61545;Q9CRS5	Q3TGU7;P50580;Q05BN2;Q3UMW2;D3YVH7	Q3TAH3;Q9CPP0	Q9D8Z1
	P42128	H3BJ30;H3BJW3;Q6NVF9							Q9R1Q8;Q9D6K2	Q3TDX2;Q8VEJ9					B2CY77;P14206	Q8VEH8;Q9CWA6;F6Z458;Q3TRQ6;F7AQQ2		B2RX66;Q5F2E8;Q3UUG1							Q5HZY7;Q9CR51;Q3U7E0	P63242	Q6PIP5	A0A068BGT0;Q8C754;G3UY33;Q3V3A4;Q8C754-2							E9QKR1;J3QNM3;E9QKQ9;E9QLZ9;Q03173-6;Q03173-3;Q03173-4;Q03173-5;Q03173	Q3U9V4;P62880;E9QKR0;D3YZX3;D3Z1M1;D3Z1T4	Q5GQ64;Q9Z0F7	Q8BXR1;D3YY38
	Q544Y8;Q3UC19;Q3TVQ3;Q3U9K2;Q9D2V3;Q3UD85;Q3UAJ3;Q3U9N4;Q3U8W3;Q3TW77;P28798;Q3UDD6;Q3TX66;Q3TWT4;Q3U5Q6	B9EKJ1;A3KGU7;B2RXX6							A2ACL9;Q62443;Q3UST4	Q3UWS9;Q3U7H9;P99029-2;P99029;G3UZJ4;H3BJQ7;Q9D6X2					Q91ZP9;Q3B7X9;Q3B7Y0;Q91ZP9-2;D3Z103	Q3UHY8;P61222;Q6NXX7;Q3TJM9;Q3TIU8;Q8C2N8		Q9R060							E0CYJ0;E0CXA9;Q3UGM5;Q6PEB6;G8JL35	Q4VA29;Q9CQE8;J3QNB0	Q3TPJ8;A2BFF7;A2BFF9;D6Q0F6;D6Q0F5;O88487;A2BFF8;D6Q0F7;A2BFF5;Q3UDA2	Q9DBG7							Q5SUR3;Q9WTX5;Q3TL58	Q5U438;Q5SQB7;Q61937;Q9DAY9;Q5SQB5;Q5BL09;Q3U536;Q8BSZ3;E9Q5T3	P63242	Q540D7;Q9JII6;Q80XJ7;Q3UJW9;B1AXW3
	O88967	Q3UGN9;Q3TQ49;Q3UMC8;P70297;A2ARJ0							P39054;Q3T9X3;F8WIV5;P39054-2;G3UZZ3	Q5SUR0					D3Z5M2;Q99LF8	F8WID5		Q4FK57;Q8R180;Q4FJZ3							Q99KP6;Q99KP6-2;Q4ADG5;Q99KP6-3	Q3TPJ8;A2BFF7;A2BFF9;D6Q0F6;D6Q0F5;O88487;A2BFF8;D6Q0F7;A2BFF5;Q3UDA2	Q542Y0;Q64669;Q99KL8	Q91VW5							E0CYJ0;E0CXA9;Q3UGM5;Q6PEB6;G8JL35	Q5GQ64;Q9Z0F7	Q3TLQ4;P58064	Q4FK85;Q3U607;A0A087WQT6;O89110
	A2ALV3;Q62420;Q8BXU5;F6ZL13	Q9WVA3							P05063	Q9D0J4					Q5HZY7;Q9CR51;Q3U7E0	Q6PEM5;Q5D0B0;Q6ZY49;Q52KI7;Q3TL96;Q8K295;P55302;Q6PB52;Q8C252;F6WMD1;Q3U8U9		Q3TDM8;E9Q855;Q3UK26;Q3UXS0;O35609;B2M0S2							Q52L97;P52293;Q641N9;A2A600;A2A601	Q542Y0;Q64669;Q99KL8	Q4VA29;Q9CQE8;J3QNB0	O88630;Q80UU0							O70251;A0A087WS46	Q3UHW2;Q3TT11;P51660	Q9QUM9;E0CXB1	P19096;Q3UHT6;Q3TB22
	Q58E59;Q9D554	A2ALV3;Q62420;Q8BXU5;F6ZL13							Q3U7P4;Q3TM10;Q6PGH2;Q3TJZ7	K3W4Q9;Q8BH60-2;Q8BH60					Q99J77;Q9JJH0;Q3TFB5	Q80ZP8;Q3TMX5;A8C1V1;Q9CXI5;F6USD5;F6T4L3;E0CXA8;F7C1S6		Q3UZR8;Q99LC8							Q60951;Q3UBT1;P62960;Q71V06;Q810K5;Q60950	Q99KQ9;Q9ES93;Q9R013;A4FUP7	Q99KQ9;Q9ES93;Q9R013;A4FUP7	Q3UZJ4;Q61151							Q3UKV4;D3Z5N6;Q61103;F8WIP7	Q545G0;Q9R1P1	Q3TGU7;P50580;Q05BN2;Q3UMW2;D3YVH7	Q06180-2;Q06180;D3Z6W2
	P68040	O54941							Q6A0D1;Q9CRD2	Q3UN87;P27048;P63163;O70499					Q3U8Y7;Q3TKG4;O88685;Q3TKC2;A2AGN7;B7ZCF1;A0A087WPH7;Q3UD94	Q8C6E3;Q542K4;Q3UZE7;Q3TVZ1;P24270;Q3UF58;Q91XI2;A2AL20		Q9D8Y1							Q8VDC3;P28271	Q8CE80;P51125-3;P51125-2;P51125-6;P51125;Q921U7;Q8C281;P51125-7;Q8CE04;Q8CB83	Q3UHW2;Q3TT11;P51660	S4R1P5;Q91ZU6-4;E9Q9X1;Q91ZU6;Q91ZU6-3;A0A087WSP0;Q91ZU6-2							Q9CQ49;D3Z3D2	P63242	Q5U438;Q5SQB7;Q61937;Q9DAY9;Q5SQB5;Q5BL09;Q3U536;Q8BSZ3;E9Q5T3	P83741-4;P83741-5;P83741;P83741-2;P83741-3;Q6SLK2;P83741-6
	Q8C650-2;Q8C650	Q91X52;A2AC16							A0A087WRY3;Q80XU3	Q8R3Y8-2;Q8R3Y8					Q4FJQ6;Q3U3L3;Q60854;F8WIV2;K7E6F1;E9Q108;E9Q0P9	D3YUW7;E9QMC1;Q32NZ7;Q5PPR0		Q8BNS0;Q5NBZ3;P32233;Q8CHR8							Q921W4;D3YZD6;D3Z6I4;Q921W4-2;D3YU21;F7BGV1	Q5SUR3;Q9WTX5;Q3TL58	Q8CE80;P51125-3;P51125-2;P51125-6;P51125;Q921U7;Q8C281;P51125-7;Q8CE04;Q8CB83	Q91YL3							P48722;P48722-2;E0CY23	Q9QUM9;E0CXB1	Q545G0;Q9R1P1	Q8CD26;A4FUQ6
	Q9WVA3	Q8C650-2;Q8C650							Q5BLK2;P60867	Q6P3A8;Q6P3A8-2					Q9QZD9;Q3T9Y8	P50544;B1AR28;Q3UJR6		F8WIC0;Q9D2H2							Q3TH46;Q3U111;P26043;Q7TSG6;Q8C2N4;Q05CE6	Q3UHW2;Q3TT11;P51660	A2ALR9;Q3V0C5;Q3V0C5-5;Q3V0C5-2;A2ALR8;Q3V0C5-4;Q3V0C5-3;B7ZNK5	Q9D8Z1							Q9WV98	F8WIG4;Q3TI08;Q3TY03;Q62384;F8WHU9;Q9JJA1;Q3TIH8;Q9CUE2;Q8C8U3	A0A087WNP6;Q4VAA2-2;Q4VAA2;A0A087WRM0	A0A068BGT0;Q8C754;G3UY33;Q3V3A4;Q8C754-2
	Q61191;B1AUX2	A0A087WST2;Q8BX09-2;Q8BX09							Q545V3;Q3UJ20;P17183;D3Z6E4;Q922A0	Q91X52;A2AC16					Q8C2D1	P16254;A2AUM6		A0JNY7;Q62448;G3XA17;Q62448-2;F7CBP1;Q3U9U9							Q5FWJ9;Q3UDG5;Q3U2X1;Q3TFE2;Q63850;Q3UGJ7;Q3THR9	A2ALR9;Q3V0C5;Q3V0C5-5;Q3V0C5-2;A2ALR8;Q3V0C5-4;Q3V0C5-3;B7ZNK5	Q5SUR3;Q9WTX5;Q3TL58	Q6NT99							Q6NXZ0;Q3UDD5	Q5SUR3;Q9WTX5;Q3TL58	Q99JF8;A2BI12;Q99JF8-2;Q05CD2	Q8BNZ1;O35623
	Q9QZD9;Q3T9Y8	Q9D2D1;Q544R6;G3X8T3;P16675							Q5SUR0	Q8CCI5					Q9DC07	O70251;A0A087WS46;G3UX43;M0QWK5;M0QWH8;G3UZ47;M0QW60		P26645;Q05BL6							Q9DC07	E9Q4Q2;D3YZC9;D3YZD0;Q3UK67;Q3UI45;Q64213-2;Q64213-3;Q64213;Q3TZI3;D3YVH4	Q8VDP4	Q571B0;Q9ET30;Q8C6F5;Q3UH23							Q5U438;Q5SQB7;Q61937;Q9DAY9;Q5SQB5;Q5BL09;Q3U536;Q8BSZ3;E9Q5T3	Q99JF8;A2BI12;Q99JF8-2;Q05CD2	Q5SUR3;Q9WTX5;Q3TL58	Q499D4;Q3TM67;Q9ESX5;Q3TI79;B7ZCL7;F6YUI5
	Q059U9;Q9DBR0	D3Z767;Q9D6K7;D3Z1T8;Q9D6K7-2							D3Z0F5;Q3UIT2;O88545	Q5BLJ9;P61358;Q9CSM4;A2A4Q0					Q3TJ01;Q99LF4	Q3TV94;Q52PE3;Q9CY50		B7ZMR0;Q76LS9-2;Q76LS9							D3Z1F6;B9EK90;Q8VDU5	Q99KD6;Q3UDK5;E9PZS8;Q61387;Q3U7R2	Q923G3;P47757-2;A2AMW0;P47757-4;Q3TVK4;Q3TRH8;P47757;F7CAZ6	Q8VCQ8;E9QA16;E9Q0M9;D3Z6I7;E9QA15;S4R1T7;Q3UGC3							P99028	Q91VR5;Q922B8;Q3V1Z7	Q923G3;P47757-2;A2AMW0;P47757-4;Q3TVK4;Q3TRH8;P47757;F7CAZ6	Q8R1G2
	Q3U647;Q60967;Q6NZM8;Q3TUA8	A2AD03;Q3UR39;Q9QXG2;Q8CBI2							B7ZCU2;B7ZCU5;Q3TPY5;Q3TMI0;Q6AXD3;B7ZCU4;B7ZCU3;Q3TJR5;Q3TJ64;B7ZCU0;J3QNK8;Q8CBW3-5;Q8CBW3-2;Q8CBW3-4;Q8CBW3-3;Q8CBW3;Q3UAH6	Q8N7N5;Q8N7N5-2					Q9CRB6;Q1JPR8	Q8VE47;F6VRI6;D6RH76		Q4FJY3;Q62313							F8VQ28;Q8VI36-2;Q8VI36;Q3UG90	Q8VDP4	E9Q4Q2;D3YZC9;D3YZD0;Q3UK67;Q3UI45;Q64213-2;Q64213-3;Q64213;Q3TZI3;D3YVH4	G5E896;Q3UJB9;D6RE33;Q3UJB9-2							Q91V47;Q3UK94;Q684Q9;P21126;B2M0S0;B2M0R9	Q8VDS4	Q8VDS4	Q91WG2;Q91WG2-2;Q91WG2-1;Q3TZJ2
	B9EKJ1;A3KGU7;B2RXX6	Q3UJ84;Q3U417;Q8C8U0;Q8C8U0-3;Q8C8U0-2							Q3THA6;Q8BL97-3;Q8BL97-4;Q8BL97-2;Q8BL97	D3Z1N9;F6YH22					A2A5Y6;P10637;P10637-6	A2ASS6;E9Q8N1;E9Q8K5;A2ASS6-2;F7CR78;Q3TZL3;A2AT70;Q8BM32;A2AT68;Q812E1;F6RSJ3		G5E866;Q99NB9;Q3US00;A0JLN0;Q3UIB4							E9QN52;Q91WK0-2;Q91WK0	Q923G3;P47757-2;A2AMW0;P47757-4;Q3TVK4;Q3TRH8;P47757;F7CAZ6	A0A087WNP6;Q4VAA2-2;Q4VAA2;A0A087WRM0	Q642K0;Q60605-2							Q3TDN8;Q8R164	Q923G3;P47757-2;A2AMW0;P47757-4;Q3TVK4;Q3TRH8;P47757;F7CAZ6	P16254;A2AUM6	Q8K2L8;Q3UGE1;Q8C0C3
	Q3UGN9;Q3TQ49;Q3UMC8;P70297;A2ARJ0	Q3TUF3;O35887;Q3UG11;Q3TQD1;G3UWV3;G3UWR0;G3UY49							Q3UWS9;Q3U7H9;P99029-2;P99029;G3UZJ4;H3BJQ7;Q9D6X2	B2RXY7;P48758					Q60759;Q8BVD4	Q8R3D5;P57016		Q3UZT7;Q02248;E9Q6A9;Q80VE7							Q3U647;Q60967;Q6NZM8;Q3TUA8	Q3UD26;O35593;Q9CSU2	Q52L97;P52293;Q641N9;A2A600;A2A601	Q9D002;Q9CZE1;Q545N1;P56873							Q8R5C5	E9PW20;Q9CY57-3;Q9CY57;B7ZMS6;Q2VPR3;Q9CY57-5;Q9CY57-4;Q9CY57-2;D3YZA1;D3Z7T7	F8WIG4;Q3TI08;Q3TY03;Q62384;F8WHU9;Q9JJA1;Q3TIH8;Q9CUE2;Q8C8U3	E9Q6R7
	Q8C2Q3;Q3U6A2;E9QL13;Q8C2Q3-2;Q62019	Q9CZL5							Q99J21;Q99J21-2	P68372;Q9CVR0;Q9DCR1					Q3ULG4;O35226-2;O35226-3;O35226-5	Q3ULL5;Q99L45;E0CXJ3		E9Q7L3;D3Z1W6;E9Q7L2;D3Z1N4;E9Q4Y5;F8VQD1;Q8BSQ9-2;Q8BSQ9;D3YYF2;D6RIL0;D6RI94;D3Z3R4;F6THL5							Q8CE80;P51125-3;P51125-2;P51125-6;P51125;Q921U7;Q8C281;P51125-7;Q8CE04;Q8CB83	Q3TH46;Q3U111;P26043;Q7TSG6;Q8C2N4;Q05CE6	Q810A7;Q810A7-2	Q6DI95;Q6P2B1;Q571K5;Q6P2B1-2;Q3UL39							Q3TF14;P50247;Q3U4D1;Q5M9P0;Q3U5U5;Q8BPI7	P16254;A2AUM6	Q9CSS1;E9PZM7;Q6ZPE9;Q7TML8	A8IP69;P61982
	A2AJ72;Q3TIX6;Q3ULP9	Q8BTI8-3;Q8BTI8;Q8BTI8-2							K3W4Q9;Q8BH60-2;Q8BH60	Q5BLK2;P60867					Q6ZWX6	Q8C292;Q8C1V4;Q3TIV6;Q99MN1;Q8CFK5		Q4FZL1;Q5F2A7;P60843;Q3UXC2;Q3TGK7;Q3TFG3;Q3TLL6;Q3U8I0;Q78WR5							Q8BWR2;B1AV57;Q8BWR2-2	Q52L97;P52293;Q641N9;A2A600;A2A601	Q3TH46;Q3U111;P26043;Q7TSG6;Q8C2N4;Q05CE6	Q9DBS1							B3V097;Q8BIQ5;Q8BIQ5-2;A2AEK1;B3V099	Q3TDN8;Q8R164	E9PW20;Q9CY57-3;Q9CY57;B7ZMS6;Q2VPR3;Q9CY57-5;Q9CY57-4;Q9CY57-2;D3YZA1;D3Z7T7	Q3TSR1;Q91XD6;Q3UBB2
	Q8R3Y8-2;Q8R3Y8	Q8R3Y8-2;Q8R3Y8							E0CY18;A0A087WPF5;Q91X58	Q9D1I5					Q8BWR2;B1AV57;Q8BWR2-2	Q3TW51;Q78PY7;Q3UZI3;Q3TRW3		Q3TLE2;Q8CIB5;Q3UMA4							P99028	Q3U2G2;Q571M2;Q61316	Q99KD6;Q3UDK5;E9PZS8;Q61387;Q3U7R2	P61961;H7BWZ1;D3YW97							Q8K411-2;Q8K411;Q8K411-3	Q3U102;Q925F2;Q05CZ9;D3Z5Y0	Q8VE22;F7ARZ1;Q3TI14;Q3THH3;Q99LZ4;Q5SXC9;A7M7Q8	Q8R332-2;Q6ZQC2;Q3UZQ6;Q8R332-4;Q8R332-3;Q8R332
	P60840-2;P60840;P60840-3	Q8CC21;Q8CC21-2;F7BCD5							Q8BLI4	P18608;D3Z607;Q8CEW1					Q3TDN8;Q8R164	B9EKJ7;P58871;Z4YJL4		O35114							Q99JP4	Q8K2H2	Q5EBG8	Q3UGB8;Q99J56							Q4FK11;Q3UM20;Q3TF40;Q99K48;Q3TTV7;Q3TFC2	Q4VA29;Q9CQE8;J3QNB0	Q3TDN8;Q8R164	S4R1L5;S4R2P8;O88738-3;O88738-2;O88738
	Q9R099;Q9CY49	Q564E5;Q3V244;Q9WUK2;Q3TG58;Q9WUK2-2;Q80U88							Q5SVF7;O55125;Q3UGS1;Q5SVG6	Q8CGP5;A0AUV1;A3KPD0;B2RVF0;A2AB79;Q8CGP6;Q8BFU2;P22752;Q8CGP7					Q99JY0	Q4V9T8;P48024;Q3UBT8;J3QN87;J3QPZ8		Q3TFE8;Q7TSZ6;P70168;Q3UHW8							P31750;Q8BS26;D3Z783;D3YXX3	Q3TAH3;Q9CPP0	Q8K2H2	Q9CQ45							Q8QZV7;F6W761	A0A087WNP6;Q4VAA2-2;Q4VAA2;A0A087WRM0	Q3U102;Q925F2;Q05CZ9;D3Z5Y0	Q7TPW6;Q9Z2Z6
	P97855;Q571F9;Q3UR88	P55095;A2AS86							Q8CGP5;A0AUV1;A3KPD0;B2RVF0;A2AB79;Q8CGP6;Q8BFU2;P22752;Q8CGP7	E0CYX9;Q3TC33;E0CYP1;Q3TC33-2					Q61655	Q9Z2Q6;B7ZNM7;Q52KH2;Q68FM0		Q9CXR1							Q9CQ49;D3Z3D2	Q4FK11;Q3UM20;Q3TF40;Q99K48;Q3TTV7;Q3TFC2	Q8VBT9;Q8VBT9-3;Q8VBT9-2	Q3U5X7;Q3TXN3;Q921V5;Q3TBY6							Q9Z2I8;C6EQH3;Q9Z2I8-2	Q99JY0	Q91VR5;Q922B8;Q3V1Z7	Q91YT7;Q3UNH5
	Q9DCB1	Q61033							Q8BTX9	Q3U7P4;Q3TM10;Q6PGH2;Q3TJZ7					Q8K2C6;Q5M8R0	Q9QXT0		A2RRJ4;Q924C1							Q4FJN2;Q64378;Q3TX72	P16254;A2AUM6	Q8R050-2;Q8R050;Q8CCV1;Q8BPH0;Q3UL02	P43275							Q3U647;Q60967;Q6NZM8;Q3TUA8	Q8VE22;F7ARZ1;Q3TI14;Q3THH3;Q99LZ4;Q5SXC9;A7M7Q8	Q99JY0	Q99JI4;Q8C1T2
	P54071	P42128							Q545K5;O89086;Q8BG13	Q99LC2					O70251;A0A087WS46	Q3TQR3;P59325;Q3TKY2;Q8BVV6;Q05CM5;Q05CH7;Q3TT65;Q6PHA6;Q05C65		Q3U2X5;Q64133;Q3TPD9;Q3UJ53							Q8C1B7-3;Q8C1B7-2;Q8C1B7	Q63918	Q4FK11;Q3UM20;Q3TF40;Q99K48;Q3TTV7;Q3TFC2	Q9CPY7-2;Q9CPY7							Q3URU2;Q3URU2-2;Q0P5Y8	A2BGI8;Q4G0C5;Q3UWH9;Q9D868-2;Q3UY37;Q9D868;A2BGI9	Q4VA29;Q9CQE8;J3QNB0	Q3TWY6;Q9Z160;Q3TR89;Q3TAY0;Q3U7X8;Q810S7;Q3TYM3
	Q3TUF3;O35887;Q3UG11;Q3TQD1;G3UWV3;G3UWR0;G3UY49	Q8C5R8;Q32M04;Q9CVZ1							Q91X52;A2AC16	P83917;Q7TPM0;Q9CYJ8					Q4FJN2;Q64378;Q3TX72	Q91V38;Q3UAD6;P08113;Q3UBU0;Q3TUD6;Q8CCY5;F7C312;Q8C2R2;Q9CW12		Q8QZY1							Q80YU9;A2AN96;O88851	Q8VBT9;Q8VBT9-3;Q8VBT9-2	P16254;A2AUM6	Q9D958							Q9D0L8;Q9D0L8-2;Q9D0L8-3;D3YYS7;D3Z478	Q9CSS1;E9PZM7;Q6ZPE9;Q7TML8	Q5HZY7;Q9CR51;Q3U7E0	Q80Y14
	P62627;A2AVR9	O88569;O88569-2;O88569-3;B7ZP22							D3Z1N9;F6YH22	O70569;P62264;Q3UJS5;D3YVF4;D3Z7I1					Q8VDC3;P28271	Q58DZ3;P62889;Q497D7;Q5PR15		P27546-2;P27546;P27546-3;E9PZ43							Q99J77;Q9JJH0;Q3TFB5	Q810A7;Q810A7-2	Q3UD26;O35593;Q9CSU2	Q5SWR1;Q9DBG3;Q9DBG3-2;H3BIY9;H3BKM0							Q9CWJ9	Q3UKV4;D3Z5N6;Q61103;F8WIP7	A2BGI8;Q4G0C5;Q3UWH9;Q9D868-2;Q3UY37;Q9D868;A2BGI9	Q9JKY0
	O54941	Q3TCW5;Q99J45;D3YUV1							Q9D2D1;Q544R6;G3X8T3;P16675	Q545K5;O89086;Q8BG13						O08795-2;Q3U518;O08795;Q3TWG2;Q9WVP2;Q9R1N5		Q499D4;Q3TM67;Q9ESX5;Q3TI79;B7ZCL7;F6YUI5							Q8R5C5	Q8R050-2;Q8R050;Q8CCV1;Q8BPH0;Q3UL02	Q3U2G2;Q571M2;Q61316	Q91YH5;E9PYT3;Q91YH5-2							Q8K2H2	Q8VBT9;Q8VBT9-3;Q8VBT9-2	B2RXW8;B2RXQ2;B8QI33	Q3UHY8;P61222;Q6NXX7;Q3TJM9;Q3TIU8
	D3Z767;Q9D6K7;D3Z1T8;Q9D6K7-2	Q9JHQ5;Q8CDG8;Q3UHL8;F6VG18;F6VTH5							B2RUK5;Q3ULD5;Q6PD20	Q3UII2;P40237;A2AIJ1						A0AUN0;Q4G0C0;G3X928		P14685;Q8BK46;Q3ULJ5							P62073	A0A087WNP6;Q4VAA2-2;Q4VAA2;A0A087WRM0	Q3TAH3;Q9CPP0	Q3UQL2;O88543;Q8BX58							Q3U2G2;Q571M2;Q61316	Q9CQ92;G3X9U9	Q8VBT9;Q8VBT9-3;Q8VBT9-2	Q3TDQ1
	Q7TMK9-2;Q7TMK9;G3UZI2;G3V018;G3UZ48;G3UXJ6	Q922Z3;Q3UPJ8;Q3TK29;Q9CQN1;Q922R9;Q3TSG8							E0CYX9;Q3TC33;E0CYP1;Q3TC33-2	P62862;Q642K5;Q3THB2;Q920W8;Q91V99						Q8C2D1;A7XUS2		Q3TGM7;Q69ZS7;Q3UJ02;Q69ZS7-2							G3UYV7;Q059I1;P62858	P34022;H7BX22;Q3U6M5	Q5M9P7;Q9CR86;Q3UD53;Q3U434	Q3TDN2;Q3TDN2-2;D3Z2H4							F8WI31;Q922V4;D3Z4V1	B2RXW8;B2RXQ2;B8QI33	P61164	Q4FZL1;Q5F2A7;P60843;Q3UXC2;Q3TGK7;Q3TFG3;Q3TLL6;Q3U8I0;Q78WR5
	Q6A0A2;Q6A0A2-2;Q6A0A2-3	P97855;Q571F9;Q3UR88							Q91ZZ3	Q4KL81;P63260;Q3TSB7;Q3UD81						Q9D1M0		Q9DBJ3							F8WI31;Q922V4;D3Z4V1	I7HLV2;Q3THJ6;Q6ZWV3;P86048	P34022;H7BX22;Q3U6M5	Q6A028							Q99KP6;Q99KP6-2;Q4ADG5;Q99KP6-3	P61164	Q68EF0	E9QB02;Q68FL6
	Q3UPB9;Q3U1H7;Q8C788;Q91ZR2	Q9R099;Q9CY49							Q9D1R9	Q9CSH3;Q8R2P7						P62843;Q3UK70;Q3UXS6		Q8CAW4							Q9D7X8	Q8C2Q8;Q9D9D7;Q3UD06;Q91VR2;A2AKU9;Q9ERA8;A2AKV2;A2AKV3;A2AKV1	Q9EQS3;Q3V1X1;Q8C5M8;A2A7K5	Q3UFV9;Q91YW3;Q3UKA1							Q99KQ9;Q9ES93;Q9R013;A4FUP7	Q545F4;P14602-2;P14602;P14602-3;D3YZ06	Q3UKV4;D3Z5N6;Q61103;F8WIP7	Q3UAP1;Q9WUQ2;D3Z3S1
	Q91WU5	Q3UPB9;Q3U1H7;Q8C788;Q91ZR2							A7VMV2;Q99KP3	E0CXZ1;J3QM95;F8WGT4;Q8BYN5-2;Q8BYN5						P32020;P32020-2;A2APS4		Q6ZWX2;P20065-2;P20065							D3YWX2;E9Q803;F6YTL8;Q9R0I7	P62627;A2AVR9	Q8C2Q8;Q9D9D7;Q3UD06;Q91VR2;A2AKU9;Q9ERA8;A2AKV2;A2AKV3;A2AKV1	Q8BQW4;A2AH25;Q5FWK3;Q8C5A0							Q3U8Y7;Q3TKG4;O88685;Q3TKC2;A2AGN7;B7ZCF1;A0A087WPH7;Q3UD94	Q921W4;D3YZD6;D3Z6I4;Q921W4-2;D3YU21;F7BGV1	Q9CQ92;G3X9U9	Q91XE8
	Q6P5C5;Q3T9H8	Q61191;B1AUX2							B2RRS4;E9PWV7;Q923K4;D6RDC6;Q923K4-2	P42669;Q8C6E9						P31230;Q3UZG4;Q8C2U7;Q3TUZ1		Q5HZI6;P23591							Q9Z0H8-2;Q9Z0H8;Q6A090	Q5M9P7;Q9CR86;Q3UD53;Q3U434	P62627;A2AVR9	Q3TWY6;Q9Z160;Q3TR89;Q3TAY0;Q3U7X8;Q810S7;Q3TYM3							Q99JP4	Q9R0H0-2;Q9R0H0;A2A848;Q8C168;Q8BW35	Q921W4;D3YZD6;D3Z6I4;Q921W4-2;D3YU21;F7BGV1	Q6PDY2
	P14733;Q8C553	P60840-2;P60840;P60840-3							Q4W8U9	F8WIX8;B2RWH3;Q6GSS7;Q149V4;Q64523						Q3UPL0;Q3UPL0-2;S4R256;Q3UPL0-3;Q9CVL3;S4R1T5;Q05DS7;S4R1Y8		Q99LG0;D3YVU1							Q3U8Y7;Q3TKG4;O88685;Q3TKC2;A2AGN7;B7ZCF1;A0A087WPH7;Q3UD94	Q9EQS3;Q3V1X1;Q8C5M8;A2A7K5	Q63918	A2AN08-3;A2AN08;A2AN08-5;A2AN08-2							Q8K009;D3Z6B9	Q68EF0	Q545F4;P14602-2;P14602;P14602-3;D3YZ06	O35852;Q3UZW2;O35417
	Q61033	Q61699;Q61699-2;E9Q0U7							Q3UNN4;Q3UPK0;Q3UMX0;P97496-2;P97496;D3Z1X8	Q547R0;E9QAT0;Q6AXB7;P35922-3;P35922-2;P35922;D3Z6U8;E9QNF5;E9QAS8;P35922-9;P35922-8;P35922-7;E9QAS9;P35922-5;P35922-4;P35922-6;P35922-11;P35922-10;P35922-12;Q8BPK8						Q5NC81;P15532;Q5NC80		Q64444;Q3U3I1;F6ST32							B2RXW8;B2RXQ2;B8QI33	Q5EBG8	I7HLV2;Q3THJ6;Q6ZWV3;P86048	Q8BVE3							Q8BWR2;B1AV57;Q8BWR2-2	Q5HZY7;Q9CR51;Q3U7E0	Q9R0H0-2;Q9R0H0;A2A848;Q8C168;Q8BW35	Q3TBF1;Q08642;A3KME9
	Q8BTJ1;Q543K5;Q3ULZ3;Q99K85;Q3U6K9	Q9DCB1							Q3U3H9;P61963;Q80ZU1	Q3U6U7;P32921-2;Q3UDG2;Q4FJZ4;P32921								Q9CY27;G3UWE1;Q52L67;Q9CWN2							Q1HFZ0;H3BKN0;Q1HFZ0-2	Q5SUT0;Q3UI30;Q6NVA3;Q5SUS9;Q61545;Q9CRS5	Q921W4;D3YZD6;D3Z6I4;Q921W4-2;D3YU21;F7BGV1	Q9QYE6							Q3TH46;Q3U111;P26043;Q7TSG6;Q8C2N4;Q05CE6	Q63918	B7ZN44;A5CVE4;I1E4X8;B2RQE3;P83093;Q8BIM2;F6WBP9	Q5I012-3;J3QNE8;Q5I012;Q99JV6;Q7TMR2
	Q9CQ85;E9PXB9;Z4YN86;B0QZS8	Q8C2Q3;Q3U6A2;E9QL13;Q8C2Q3-2;Q62019							Q8R1Q3	Q9CWW6								Q8C0L8							Q7TMN7	A2BGI8;Q4G0C5;Q3UWH9;Q9D868-2;Q3UY37;Q9D868;A2BGI9	A2BGI8;Q4G0C5;Q3UWH9;Q9D868-2;Q3UY37;Q9D868;A2BGI9	Q06180-2;Q06180;D3Z6W2							Q99JF8;A2BI12;Q99JF8-2;Q05CD2	I7HLV2;Q3THJ6;Q6ZWV3;P86048	O88291;D3YXQ7	Q6P9Q6;B2RQ18;Q80YW9;Q80YW6
	E9Q509;Q3UEI4;G3X925;Q3UEH4;P53657;A7MCU9	E9QKR1;J3QNM3;E9QKQ9;E9QLZ9;Q03173-6;Q03173-3;Q03173-4;Q03173-5;Q03173							Q4KL81;P63260;Q3TSB7;Q3UD81	Q99LU0;Q3TJ28								Q3UMR5;Q3UMR5-2							B2RRE0;Q9WTQ5;Q9WTQ5-2	Q921W4;D3YZD6;D3Z6I4;Q921W4-2;D3YU21;F7BGV1	Q5SUT0;Q3UI30;Q6NVA3;Q5SUS9;Q61545;Q9CRS5	Q6P9Q6;B2RQ18;Q80YW9;Q80YW6							Q3U9V4;P62880;E9QKR0;D3YZX3;D3Z1M1;D3Z1T4	O88291;D3YXQ7	O54988	Q91XU3
	A2AMH5;A2AMH3;A2AMH4;Q6X893;Q6X893-2	P14733;Q8C553							Q8BJF9	P62274								Q61177;Q60737;Q9D0E8;Q8CD20							Q61699;Q61699-2;E9Q0U7	Q91VE6-2;Q91VE6	Q91VE6-2;Q91VE6	Q5SXR6;Q68FD5;Q80U89;Q3UPJ3							Q542Y0;Q64669;Q99KL8	Q9CPQ1	Q6P264;Q7TQJ3;Q9ER35	Q9JJ06
	Q3UJ84;Q3U417;Q8C8U0;Q8C8U0-3;Q8C8U0-2	Q9CRB6;Q1JPR8							O70569;P62264;Q3UJS5;D3YVF4;D3Z7I1									Q8C1Z9;F6V6T4;A2RS53;Q9R0Q3;Q3THL1;Q8BPI2							Q80T06;Q91VK2;P57776;E9QN08;D3YY68;D3YUQ9;D3YZT9	P32020;P32020-2	P32020;P32020-2	Q3UPH1							Q545F4;P14602-2;P14602;P14602-3;D3YZ06	O54988	I7HLV2;Q3THJ6;Q6ZWV3;P86048	B7ZWC4;Q07113;B9EKB8
	P55095;A2AS86	B7ZP16;H7BWY3;Q3UEG6							Q3UII2;P40237;A2AIJ1									Q9D820;Q9D820-2							Q3UK83;Q3U7F3;Q3TIK8;Q5EBP8;P49312;Q3TFB1;P49312-2	Q3U102;Q925F2;Q05CZ9;D3Z5Y0	Q5BLK0;P35979;Q8C2K0;Q3TIQ2	Q64471;Q9DCY6;D3Z3X5							D3Z1F6;B9EK90;Q8VDU5	B7ZN44;A5CVE4;I1E4X8;B2RQE3;P83093;Q8BIM2;F6WBP9	Q63918	Q8BVE3
	B2RRS4;E9PWV7;Q923K4;D6RDC6;Q923K4-2	P0C028;P0C027							Q99LC2									Q7TQD5;Q3UGT1;P97742;A8ASF5							Q9CRB6;Q1JPR8	Q01853;Q8BNF8	Q01853;Q8BNF8	Q3UIA4;Q9JHW9							Q80T06;Q91VK2;P57776;E9QN08;D3YY68;D3YUQ9;D3YZT9	P62627;A2AVR9	Q9EQS3;Q3V1X1;Q8C5M8;A2A7K5	Q3UJC3;O70310
	Q61699;Q61699-2;E9Q0U7	Q7TMK9-2;Q7TMK9;G3UZI2;G3V018;G3UZ48;G3UXJ6							Q547R0;E9QAT0;Q6AXB7;P35922-3;P35922-2;P35922;D3Z6U8;E9QNF5;E9QAS8;P35922-9;P35922-8;P35922-7;E9QAS9;P35922-5;P35922-4;P35922-6;P35922-11;P35922-10;P35922-12;Q8BPK8									A2AA71;Q3U2P1							Q8CGA0	Q5SWJ8;P60060;G3UWH0	Q3U102;Q925F2;Q05CZ9;D3Z5Y0	Q8R1U1;G3UWH9;Q7TSQ9							Q9CSS1;E9PZM7;Q6ZPE9;Q7TML8	Q9EQS3;Q3V1X1;Q8C5M8;A2A7K5	P62627;A2AVR9	Q3UH60;D3Z5G8;Q3UH60-2
	Q3TCW5;Q99J45;D3YUV1	Q8BTJ1;Q543K5;Q3ULZ3;Q99K85;Q3U6K9							P68372;Q9CVR0;Q9DCR1									Q8R3I3							Q9DBE7;A2A5S3;Q3TWP5;Q641P2;Q3TJ07;Q3UTC8;Q3TU43;Q3TWA1;Q3UKX3;A2A5R8;Q3U8D3;Q9Z108;V9GX87;Q3U7A6;Q6TNG5	Q80YU9;A2AN96;O88851	Q8K1M3;P12367	Q91V28;Q3UAG2;Q9DCD0;Q91YT9							Q99LB6	Q6P264;Q7TQJ3;Q9ER35	Q9CPQ1	Q9DAI2;Q3TV16
	Q80WR0;E9Q3G8;Q80UN3	Q3U8E7;P18155							P18608;D3Z607;Q8CEW1									Q8CCJ3;Q8CCJ3-1							Q8BTX5;Q5M9L0;Q3TII2;Q91WK2;Q3THW7;Q3TIK5	Q9D1M0	Q8C650-2;Q8C650	A2AVJ7;Q99PL5							Q8CGA0	Q3THQ5;Q60864	Q3THQ5;Q60864	Q8VHC3
	A0A087WST2;Q8BX09-2;Q8BX09	Q8BTX5;Q5M9L0;Q3TII2;Q91WK2;Q3THW7;Q3TIK5							Q9D1I5									Q3UQL2;O88543;Q8BX58							Q61655	P62843;Q3UK70;Q3UXS6	Q80YU9;A2AN96;O88851	Q3U487							Q9D7X8	P62843;Q3UK70;Q3UXS6	Q9JKB1;Q8BWQ9	Q3TYS4;Q9D662;Q3TAW4;Q3UKB4;Q3TIS3;Q8CDS4
	Q3TH57;Q8CGF7-2;Q8CGF7;Q8CGF7-3	Q3UZZ6;Q8BT67							P62862;Q642K5;Q3THB2;Q920W8;Q91V99									Q545E6;Q62348							Q9QZD9;Q3T9Y8	Q8K1M3;P12367	B2RXW8;B2RXQ2;B8QI33	Q9JKF1							E9Q983;Q8K4L2;E9Q3Z5;Q8K4L3;E3VVQ8	Q9JKB1;Q8BWQ9	P62843;Q3UK70;Q3UXS6	Q4PZA2-3;Q4PZA2-4;Q4PZA2;Q4PZA2-2
	Q3U8E7;P18155	A1L0U3;B9EI85;P84228;A1L0V4;P68433;F8WI35							Q8R3Y8-2;Q8R3Y8									Q9D7E4							O70194	Q5BLK0;P35979;Q8C2K0;Q3TIQ2	Q9D1M0	A2AEM2;Q99LI2							P62073	Q91V47;Q3UK94;Q684Q9;P21126;B2M0S0;B2M0R9	Q5BLK0;P35979;Q8C2K0;Q3TIQ2	Q3U344;P84078;P61205
	E9PX68;Q5BKS1;O54716;E9Q585;Q3UHY0;E9Q1Q0;Q3UUI2;Q6GQW1	P62073							P83917;Q7TPM0;Q9CYJ8									Q9ER00;Q3TIL5;Q3TDG9							P54775;Q569X4;Q3TFA5;Q8BKU2;Q3TJ97;Q3UBF0;Q52L53	D3Z1F6;B9EK90;Q8VDU5	Q5SWJ8;P60060;G3UWH0	Q4FK85;Q3U607;A0A087WQT6;O89110							Q8QZZ7;G3X9K8	Q3TA59;F6Q269;D3Z1G6	Q3TA59;F6Q269;D3Z1G6	P97868-2;P97868
	A1L0U3;B9EI85;P84228;A1L0V4;P68433;F8WI35	Q545F4;P14602-2;P14602;P14602-3;D3YZ06							F8WIX8;B2RWH3;Q6GSS7;Q149V4;Q64523									Q569Z6;Q8BZN7;Q91VL2							A2A5Y6;P10637;P10637-6	Q99LB6	P62843;Q3UK70;Q3UXS6	Q3U944;Q9D0F3							Q7TMN7	Q3UBA6;P63017;Q3U9L2;Q3TEK2;Q504P4;Q3TRH3;Q3TQ13;Q3ULM1;Q3TH56;Q3TZJ3;Q3KQJ4;Q3UDS0;Q3TH04;Q3TB63;Q3UXU1	P32020;P32020-2	O08807
	Q922F6	A2AJ72;Q3TIX6;Q3ULP9							Q99LU0;Q3TJ28									Q80ZX0;Q3UDH4;F6VJC5;Q3U882;Q6PFZ1							O55234	A2AWN8;P59326;Q3TH60	Q99LB6	Q8VCE7;A2RS96;Q9CXE7;Q3U9T7;Q3TW73;E9PXY3							Q80YU9;A2AN96;O88851	Q3U741;Q501J6;Q3TU25;Q501J6-2	Q91V47;Q3UK94;Q684Q9;P21126;B2M0S0;B2M0R9	Q9QXB9
	Q564E5;Q3V244;Q9WUK2;Q3TG58;Q9WUK2-2;Q80U88	Q9CWW6							Q3U6U7;P32921-2;Q3UDG2;Q4FJZ4;P32921									E9Q9N6;E9PYX3;F6ZS70;E9QMP6;Q05512-3;Q05512-4;Q05512;Q3T9A3;Q571J8;Q05512-2;Q3U3A1							Q9JHL1;Q9JHL1-2	B2RXW8;B2RXQ2;B8QI33	A2AWN8;P59326;Q3TH60	O08582							Q9Z0H8-2;Q9Z0H8;Q6A090	P32020;P32020-2	Q3U741;Q501J6;Q3TU25;Q501J6-2	G3X8R2;Q80VJ2
	A2AP93;A2AP92;Q543B5;Q3TXG1;Q923A8;Q62073	B2RSN3;Q9CWF2;Q99J49							Q9CWW6									E9Q705;Q14A77;E9PX89;Q8CEI1;Q3TSQ5								Q4FJN2;Q64378;Q3TX72	D3Z1F6;B9EK90;Q8VDU5	Q99M51;Q8BH99;Q8BMV0;Q8BZ27;A0A087WSB1							B2RSN3;Q9CWF2;Q99J49	B3V097;Q8BIQ5;Q8BIQ5-2;A2AEK1;B3V099	Q01853;Q8BNF8	Q91YR7;Q91YR7-2
	Q925E7;F6RV17	Q8BH43;Q3T9Z7;Q80UQ8							Q8N7N5;Q8N7N5-2									Q8BSN6;O70480								Q58EU1;Q8BWU5;Q3UQ67;E9QMF4;E0CYN9	Q8C570;Q8CBU3	Q8C076;P59016							Q58EU1;Q8BWU5;Q3UQ67;E9QMF4;E0CYN9	Q5BLK0;P35979;Q8C2K0;Q3TIQ2	Q3UBA6;P63017;Q3U9L2;Q3TEK2;Q504P4;Q3TRH3;Q3TQ13;Q3ULM1;Q3TH56;Q3TZJ3;Q3KQJ4;Q3UDS0;Q3TH04;Q3TB63;Q3UXU1	Q925B0;Q925B0-2
	Q9CQZ1	Q6A0A2;Q6A0A2-2;Q6A0A2-3							E0CXZ1;J3QM95;F8WGT4;Q8BYN5-2;Q8BYN5									Q9DBH5								P68040	Q4FJN2;Q64378;Q3TX72	Q9CPW2							Q8VDC3;P28271	Q9D1M0	Q9D1M0	Q99K23
	P28659-4;P28659-2;P28659-3;P28659	Q91WU5							P62274									Q6NZR5;Q3TW36;Q8CDP6;O70349;Q8R3X0;Q3TE28								Q8C650-2;Q8C650	B2RSN3;Q9CWF2;Q99J49	B9EKP5;B7FAU9;Q8BTM8;B7FAV1;Q6KAM8							Q8BTX5;Q5M9L0;Q3TII2;Q91WK2;Q3THW7;Q3TIK5	Q8C2Q8;Q9D9D7;Q3UD06;Q91VR2;A2AKU9;Q9ERA8;A2AKV2;A2AKV3;A2AKV1	B3V097;Q8BIQ5;Q8BIQ5-2;A2AEK1;B3V099	S4R1X1;Q7TMQ7
	Q8BH43;Q3T9Z7;Q80UQ8	Q9CQZ1							P42669;Q8C6E9									G3X9V2;E9Q8Z6;E9Q8Z8;P30999;E9Q8Z4;E9Q8Z9;D3Z2H2;E9Q901;E9Q904;E9Q986;D3Z7H6;E9Q907;E9Q905;D3Z2H7								Q8C570;Q8CBU3	Q58EU1;Q8BWU5;Q3UQ67;E9QMF4;E0CYN9	Q9R0A0;Q9QX52							Q4FJN2;Q64378;Q3TX72	Q01853;Q8BNF8	Q64737;Q3UJP8;Q3TH49;Q64737-2	Q3UZR8;Q99LC8
	Q9CWW6	Q80WR0;E9Q3G8;Q80UN3							Q9CSH3;Q8R2P7									Q61833;A2ACG7;Q3U505;Q9DBG6								B2RSN3;Q9CWF2;Q99J49	P68040	Q3TJD0;P61620							E9QN52;Q91WK0-2;Q91WK0	Q542Y0;Q64669;Q99KL8	Q542Y0;Q64669;Q99KL8	Q5NC81;P15532;Q5NC80
	Q3V038	E9Q509;Q3UEI4;G3X925;Q3UEH4;P53657;A7MCU9																B2RRC5;A2AWA9								Q9QZ83	Q9QZ83	P63254;Q8C2N7;Q6P3B4							Q3UIG8;Q9JIF0-2;Q8C2D7;Q3TPF5;Q80WB1;Q80WV6;Q9JIF0-3;Q9JIF0;D3Z0A2;F8WH01;D3Z3N0;Q9CX58	Q64737;Q3UJP8;Q3TH49;Q64737-2	Q6NXZ0;Q3UDD5	Q8BHE8
	Q545F4;P14602-2;P14602;P14602-3;D3YZ06	A2AMH5;A2AMH3;A2AMH4;Q6X893;Q6X893-2																Q5XK33;Q9CZB0;F8WGB3								Q3TUF3;O35887;Q3UG11;Q3TQD1;G3UWV3;G3UWR0;G3UY49	Q3TUF3;O35887;Q3UG11;Q3TQD1;G3UWV3;G3UWR0;G3UY49	A0A067XG53;B9EJ23;B7ZP42;O70589-3;O70589-4;O70589-5;O70589;O70589-2							P31750;Q8BS26;D3Z783;D3YXX3	Q6NXZ0;Q3UDD5	Q8C2Q8;Q9D9D7;Q3UD06;Q91VR2;A2AKU9;Q9ERA8;A2AKV2;A2AKV3;A2AKV1	Q9JKF1
	Q5EBP9;Q62318;Q3UDN8;Q62318-2	Q8R0M2;Q3U548;Q91ZJ5-2;Q91ZJ5																P56375								Q8VDC3;P28271	P62073	Q8C4G3;Q8C288;Q505G9;A2AQC3;Q6DI68;O70228							Q9DBE7;A2A5S3;Q3TWP5;Q641P2;Q3TJ07;Q3UTC8;Q3TU43;Q3TWA1;Q3UKX3;A2A5R8;Q3U8D3;Q9Z108;V9GX87;Q3U7A6;Q6TNG5	E9Q4Q2;D3YZC9;D3YZD0;Q3UK67;Q3UI45;Q64213-2;Q64213-3;Q64213;Q3TZI3;D3YVH4	Q8R050-2;Q8R050;Q8CCV1;Q8BPH0;Q3UL02	Q9QXK3-4;Q9QXK3;Q9QXK3-3
	P0C028;P0C027	Q925E7;F6RV17																Q9D7N9								Q3TA59;F6Q269;D3Z1G6	Q3TA59;F6Q269;D3Z1G6	A8IP69;P61982							Q1HFZ0;H3BKN0;Q1HFZ0-2	Q8R050-2;Q8R050;Q8CCV1;Q8BPH0;Q3UL02	Q3UIG8;Q9JIF0-2;Q8C2D7;Q3TPF5;Q80WB1;Q80WV6;Q9JIF0-3;Q9JIF0;D3Z0A2;F8WH01;D3Z3N0;Q9CX58	Q8C0Y0;Q8C0Y0-3;Q8C0Y0-2
	P62073	Q9ESU1;Q6ZWP4;Q9Z0H3;Q9ESU0;Q3UDA4;Q9Z0H3-2;Q9JJD1																Q3TZ03;Q920N2;Q3TG10								P62073	Q9JKB1;Q8BWQ9	Q8VD04;A2AEW8;A2AEW9;A2AEW5;A2AEW6							Q3UK83;Q3U7F3;Q3TIK8;Q5EBP8;P49312;Q3TFB1;P49312-2	Q3TH46;Q3U111;P26043;Q7TSG6;Q8C2N4;Q05CE6	E9Q4Q2;D3YZC9;D3YZD0;Q3UK67;Q3UI45;Q64213-2;Q64213-3;Q64213;Q3TZI3;D3YVH4	P27046
	Q9CXW2	P54071																Q9CPS8								Q9D0L8;Q9D0L8-2;Q9D0L8-3;D3YYS7;D3Z478	Q8VDC3;P28271	Q8K215							Q9DC07	Q3UIG8;Q9JIF0-2;Q8C2D7;Q3TPF5;Q80WB1;Q80WV6;Q9JIF0-3;Q9JIF0;D3Z0A2;F8WH01;D3Z3N0;Q9CX58	Q3TH46;Q3U111;P26043;Q7TSG6;Q8C2N4;Q05CE6	Q5FWB6;E9Q070;D3YVM5
	Q9R0H0-2;Q9R0H0;A2A848;Q8C168;Q8BW35	Q99LC2																E9Q6R7								Q9JKB1;Q8BWQ9	P60335	Q4KMM5;Q3TIZ8;Q91XA2;Q3UZG0							O70194	Q5SWJ8;P60060;G3UWH0	Q5SWJ8;P60060;G3UWH0	P49817;H3BKG0;H3BLK5;D3Z148;P49817-2
	Q3U3H5;Q68FH4;Q8BUU7;Q3U728;Q8BWB2	Q6P5C5;Q3T9H8																E9PWG2;Q8BJI6;E9PY51;Q69ZT3								P60335	Q564E5;Q3V244;Q9WUK2;Q3TG58;Q9WUK2-2;Q80U88	Q9CYN2							B2RRE0;Q9WTQ5;Q9WTQ5-2	Q3UM23;Q91VI7	Q3UM23;Q91VI7	Q3U8F5;Q9D8W5;B1AT36;Q3TRH2
	E9QKR1;J3QNM3;E9QKQ9;E9QLZ9;Q03173-6;Q03173-3;Q03173-4;Q03173-5;Q03173	B2RRS4;E9PWV7;Q923K4;D6RDC6;Q923K4-2																Q91WM1-2;Q91WM1;Q8C5B7								B7ZN44;A5CVE4;I1E4X8;B2RQE3;P83093;Q8BIM2;F6WBP9	Q9D0L8;Q9D0L8-2;Q9D0L8-3;D3YYS7;D3Z478	Q8CEJ4;Q62468							Q61699;Q61699-2;E9Q0U7	Q99KD6;Q3UDK5;E9PZS8;Q61387;Q3U7R2	Q8K1M3;P12367	E9PWG2;Q8BJI6;E9PY51;Q69ZT3
	B2RSN3;Q9CWF2;Q99J49	Q8CGK3;Q3V2D0;Q56A16																Q8R0G9;Q8CDZ5								Q564E5;Q3V244;Q9WUK2;Q3TG58;Q9WUK2-2;Q80U88	B7ZN44;A5CVE4;I1E4X8;B2RQE3;P83093;Q8BIM2;F6WBP9	P37804							P54775;Q569X4;Q3TFA5;Q8BKU2;Q3TJ97;Q3UBF0;Q52L53	Q4FK11;Q3UM20;Q3TF40;Q99K48;Q3TTV7;Q3TFC2	Q4FK11;Q3UM20;Q3TF40;Q99K48;Q3TTV7;Q3TFC2	Q9WV55
	Q8BTX5;Q5M9L0;Q3TII2;Q91WK2;Q3THW7;Q3TIK5	Q8K1M3;P12367																Q8BI72								Q3UM23;Q91VI7	O55234	Q8K2Q0							Q9QZD9;Q3T9Y8	Q8K2H2	Q810A7;Q810A7-2	A0A087WS27;D3Z5S8
	Q3UZZ6;Q8BT67	P28659-4;P28659-2;P28659-3;P28659																Q9DBR7;Q9DBR7-2								O55234	Q9CZX8;Q5M9P3;D3YUT3;D3Z722;D3Z5R8;D3YUG3	Q3TDQ1							Q9CRB6;Q1JPR8	Q8C570;Q8CBU3	Q8K2H2	P27612
	E9QML5;Q61464-4;Q61464;E9QKZ7;Q61464-7;Q61464-2;Q61464-5;Q3TNM0;Q3TZK9;Q3TQM2;Q3TQ35	Q3V038																Q8K3X6								Q9DC07	Q3UM23;Q91VI7	Q99JZ4;Q3TXJ4;P36536							Q61655	Q8K1M3;P12367	Q99KD6;Q3UDK5;E9PZS8;Q61387;Q3U7R2	Q9Z0S9;Q62145
	Q8R5L1;O35658	Q8R5L1;O35658																A3KGA5;Q61908								Q9CZX8;Q5M9P3;D3YUT3;D3Z722;D3Z5R8;D3YUG3	Q8R5C5	Q6PGC1							Q9JHL1;Q9JHL1-2	P34022;H7BX22;Q3U6M5	P34022;H7BX22;Q3U6M5	Q58E35;P47955
	Q9CW46	Q3TJ01;Q99LF4																Q9DC50								Q8R5C5	Q9DC07	Q3U5F9;Q9JJA2;Q3U184							O55234	Q3UD26;O35593;Q9CSU2	Q8C570;Q8CBU3	O55029
	Q9CRB6;Q1JPR8	Q9CW46																Q8K221								P62196;Q99KR1;Q8K1K2	P46471;Q3UIH5;Q8BVQ9;Q3U5V3	Q921M7							A2A5Y6;P10637;P10637-6	Q810A7;Q810A7-2	Q99KQ9;Q9ES93;Q9R013;A4FUP7	O35153;I6L979
	Q8CGK3;Q3V2D0;Q56A16	Q9CXW2																Q80UW5								P46471;Q3UIH5;Q8BVQ9;Q3U5V3	P62196;Q99KR1;Q8K1K2	Q80W22								Q99KQ9;Q9ES93;Q9R013;A4FUP7	Q6PDL0	Q3UK41;Q8BG30
	P20108;Q8K4K8	Q7TQH0-2;Q7TQH0-3;Q7TQH0;Q3TGG2;E9Q5Q0;Q3TYH7																Q9DAI2;Q3TV16								Q9JHL1;Q9JHL1-2	B2CY77;P14206	A0A087WQQ5;A0A087WS29;A0A087WNW3;A0A087WQI3;F8VQC7;A0A087WQF8;A0A087WS04;A0A087WQG4;A0A087WS23;A0A087WQ25;A0A087WRS1;A0A087WP85;A0A087WP14;A0A087WPX0;A0A087WP48;A0A087WQD0;A0A087WPW5								Q6PDL0	Q3UD26;O35593;Q9CSU2	G5E850;Q544Z9;P56395
	Q8BKZ9	Q3TVI6;Q3TGG0;Q8K3G9;Q3TB15;Q3U3Y3																G5E8R1;G5E8R0;E9Q455								B2CY77;P14206	Q3TWG5;Q8R1Q8	Q8R550-3;Q3TA88;Q8R550-2;Q8R550;Q3TSX2;E9Q0C1;Q8R550-5;Q8R550-4;Q8R550-6								Q3TUF3;O35887;Q3UG11;Q3TQD1;G3UWV3;G3UWR0;G3UY49	Q3TUF3;O35887;Q3UG11;Q3TQD1;G3UWV3;G3UWR0;G3UY49	Q8BTU4;Q564E6;Q3TG93;P32067;Q9CYB9
	Q8N7N5;Q8N7N5-2	O88712-2;O88712;O88712-3																P04627;Q3UXR0;Q3TQI2;E9Q0P8								Q6PDL0	Q8C2D1	Q3UQ26;A2AI52;Q80U87;Q3UZ62;Q58E42								Q5SUT0;Q3UI30;Q6NVA3;Q5SUS9;Q61545;Q9CRS5	Q61249	Q8BH24;Q14B57
	D3Z7X0;D3Z2B3	Q9R0H0-2;Q9R0H0;A2A848;Q8C168;Q8BW35																Q8CE89;Q60720								Q3ULL5;Q99L45	Q9JHL1;Q9JHL1-2	Q91YJ3;Q8BJZ7								Q61249	Q564E5;Q3V244;Q9WUK2;Q3TG58;Q9WUK2-2;Q80U88	Q8BSX8;Q9EQG9-2;Q9EQG9;Q9EQG9-3
	Q99LC2	E9PX68;Q5BKS1;O54716;E9Q585;Q3UHY0;E9Q1Q0;Q3UUI2;Q6GQW1																Q3UFV9;Q91YW3;Q3UKA1								Q8C2D1	Q3ULL5;Q99L45	Q8C1D0;Q6ZWQ7								Q564E5;Q3V244;Q9WUK2;Q3TG58;Q9WUK2-2;Q80U88	Q5EBG8	Q61753
	Q7TQH0-2;Q7TQH0-3;Q7TQH0;Q3TGG2;E9Q5Q0;Q3TYH7	Q58EU1;Q8BWU5;Q3UQ67;E9QMF4;E0CYN9																Q3UMM1;Q922F4;Q3U9U3;Q9CUN8								P57759	P57759	Q545H7;P97352								D3Z1F6;B9EK90;Q8VDU5	D3Z1F6;B9EK90;Q8VDU5	Q545H7;P97352
	Q14AQ1;P62334;Q8QZS9	E9QML5;Q61464-4;Q61464;E9QKZ7;Q61464-7;Q61464-2;Q61464-5;Q3TNM0;Q3TZK9;Q3TQM2;Q3TQ35																E9PZ87;Q8BJG6								Q3TWG5;Q8R1Q8	Q6PDL0	Q8R3L2;B2ZAC8;Q8R3L2-3;Q8R3L2-2;Q8R3L2-5;Q8R3L2-4;Q80TL2								P68040	Q8C650-2;Q8C650	Q8K268
	D3Z0F5;Q3UIT2;O88545	Q3UWS9;Q3U7H9;P99029-2;P99029;G3UZJ4;H3BJQ7;Q9D6X2																Q3UKQ5;Q3UF03;P24668								Q61249	Q61249	Q9CXN7;D3Z2D7								Q80YU9;A2AN96;O88851	Q5SUT0;Q3UI30;Q6NVA3;Q5SUS9;Q61545;Q9CRS5	Q8CI32
	O88712-2;O88712;O88712-3	Q3TH57;Q8CGF7-2;Q8CGF7;Q8CGF7-3																Q5SXR6;Q68FD5;Q80U89;Q3UPJ3								P99028	P99028	Q9D365								Q3U2G2;Q571M2;Q61316	Q80YU9;A2AN96;O88851	A2ACP1-2;A2ACP1
	Q4W8U9	Q8BKZ9																E9PVU0;E9Q175;E9Q3L1;B2RWR8								Q8BWR2;B1AV57;Q8BWR2-2	Q8BWR2;B1AV57;Q8BWR2-2	Q80X80;Q8CAA2;Q3U590;Q9DBJ2;Q6PHC0;Q80U48;Q8CFV7								Q5EBG8	P68040	C4IXU1;Q80YT7-2
	Q8R0M2;Q3U548;Q91ZJ5-2;Q91ZJ5	Q9CQ85;E9PXB9;Z4YN86;B0QZS8																O08547;E9Q6R3;Q3UZ06								Q9D7S9	D3YWX2;E9Q803;F6YTL8;Q9R0I7	Q8BFU3;Q8BFU3-4;Q8BFU3-3;Q8BQY0;Q8C8I5;Q8BFU3-5;Q8BFU3-2								Q8C650-2;Q8C650	Q3U2G2;Q571M2;Q61316	F8VQC1;Q3UZL8;A0JLN1;E9Q740
	Q9DCJ1	P70335-2;P70335																Q3TXV1;Q3TKV1;Q8VDM4;Q3TW71;Q3TI61;Q3U9Y8;Q3TWL6;J3KMQ2								B2RRE0;Q9WTQ5;Q9WTQ5-2	B2RRE0;Q9WTQ5;Q9WTQ5-2	Q8JZN7								A2AWN8;P59326;Q3TH60	Q9CZX8;Q5M9P3;D3YUT3;D3Z722;D3Z5R8;D3YUG3	Q3UB66;Q0PD67;P62821
	P43274	Q14AQ1;P62334;Q8QZS9																Q9D1D4								Q99J77;Q9JJH0;Q3TFB5	Q99J77;Q9JJH0;Q3TFB5	Q8CID3								Q9CZX8;Q5M9P3;D3YUT3;D3Z722;D3Z5R8;D3YUG3	A2AWN8;P59326;Q3TH60	Q3ULB1;Q921W7;P47226-2;P47226
	Q3UWS9;Q3U7H9;P99029-2;P99029;G3UZJ4;H3BJQ7;Q9D6X2	Q8VIJ6;Q3TZL2																Q8BFY9-2;Q8BFY9;Q3TKD0								Q3UTJ2	Q9D7S9	Q9D1D4								Q3ULL5;Q99L45	Q3TWG5;Q8R1Q8	Q9D1Q4
	Q68EF0	Q5FW97;P17182																Q9CR67;Q9CWD1								D3YWX2;E9Q803;F6YTL8;Q9R0I7	Q5FWJ9;Q3UDG5;Q3U2X1;Q3TFE2;Q63850;Q3UGJ7;Q3THR9	Q8BWV2;G3X8X7;Q920Q4;Q920Q4-2;Q8C016								Q3TWG5;Q8R1Q8	Q3ULL5;Q99L45	Q8BHS6
	Q3TJ01;Q99LF4	Q9ERB0																Q8VDN2;Q3TXF9;Q8R3M4;Q3UCH8								G3UVU2;Q7TN25;D3YW09;Q62203	Q3UTJ2	Q3UAP1;Q9WUQ2;D3Z3S1								Q4FJN2;Q64378;Q3TX72	Q8R5C5	Q8VDD5;Q3UFT0
	Q8K1M3;P12367	A2AP93;A2AP92;Q543B5;Q3TXG1;Q923A8;Q62073																Q3TYS4;Q9D662;Q3TAW4;Q3UKB4;Q3TIS3;Q8CDS4								Q059U9;Q9DBR0	Q059U9;Q9DBR0	A2AF58;Q80T23;Q80T23-2								Q9JHL1;Q9JHL1-2	P62073	Q3U868;Q921K2;Q3TX36;Q3TM68;Q3TIV3;Q3TF18;Q3UJ03;P11103
	Q8BH95;F6T930	D3Z0F5;Q3UIT2;O88545																Q3U054;Q9D153;Q60772								E9Q983;Q8K4L2;E9Q3Z5;Q8K4L3;E3VVQ8	Q3ULG4;O35226-2;O35226-3;O35226-5	Q6DFW4								P62073	Q4FJN2;Q64378;Q3TX72	O08547;E9Q6R3;Q3UZ06
	Q3U8D2;Q99L47;Q3U9V1;Q3U3N7;F8WJK8;Q3TGW8	P70122;F6TN03																Q91WG2;Q91WG2-2;Q91WG2-1;Q3TZJ2								Q5FWJ9;Q3UDG5;Q3U2X1;Q3TFE2;Q63850;Q3UGJ7;Q3THR9	P31750;Q8BS26;D3Z783;D3YXX3	Q60803;Q3UHM2;Q3UHJ1								Q8R5C5	Q9JHL1;Q9JHL1-2	Q6PEM5;Q5D0B0;Q6ZY49;Q52KI7;Q3TL96;Q8K295;P55302;Q6PB52;Q8C252
	P70335-2;P70335	P20108;Q8K4K8																P63087-2;Q6ZWM8;Q3U7K1;P63087								P31750;Q8BS26;D3Z783;D3YXX3	Q60951;Q3UBT1;P62960;Q71V06;Q810K5;Q60950	P49817;H3BKG0;H3BLK5;D3Z148;P49817-2								P60335	P60335	Q9QYE6
	Q8VIJ6;Q3TZL2	Q5EBP9;Q62318;Q3UDN8;Q62318-2																Q05186								Q3ULG4;O35226-2;O35226-3;O35226-5	G3UVU2;Q7TN25;D3YW09;Q62203	Q499D4;Q3TM67;Q9ESX5;Q3TI79;B7ZCL7;F6YUI5								Q58EU1;Q8BWU5;Q3UQ67;E9QMF4;E0CYN9	Q58EU1;Q8BWU5;Q3UQ67;E9QMF4;E0CYN9	Z4YJY0;Q3TCJ1;D3Z4D8
	Q3TVI6;Q3TGG0;Q8K3G9;Q3TB15;Q3U3Y3	Q9DCJ1																E9Q640;Q6NZN0-5;Q6NZN0-3;Q6NZN0-4;Q6NZN0-2;Q6NZN0;E9PYZ7;E9PUF4								Q60951;Q3UBT1;P62960;Q71V06;Q810K5;Q60950	Q99KP6;Q99KP6-2;Q4ADG5;Q99KP6-3	P25799;P25799-4;P25799-2;P25799-3								G3UVU2;Q7TN25;D3YW09;Q62203	Q8C2D1	Q8BYA0
	Q9WVJ3-2;Q9WVJ3;Q3U496	Q921W2;Q545C1;P70318;D6RGU1																B7ZWC4;Q07113;B9EKB8								Q99KP6;Q99KP6-2;Q4ADG5;Q99KP6-3	E9Q983;Q8K4L2;E9Q3Z5;Q8K4L3;E3VVQ8	Q3ULN6;Q8R127;J3QNN5								Q9D0J2;Q4FK74;Q9D3D9;Q9DCZ0	G3UVU2;Q7TN25;D3YW09;Q62203	Q9JKE5;Q03141-2;Q03141-3;Q03141;Q5DTG3
	Q9ESU1;Q6ZWP4;Q9Z0H3;Q9ESU0;Q3UDA4;Q9Z0H3-2;Q9JJD1	Q3TLQ4;P58064																Q6GTY4;Q9Z2G6-2;J3QJX3;Q5DTL8;Q9Z2G6								E9Q1G8;Q8C2A3;E9Q9F5;O55131;Q3UNN1;Q5DTS3	Q8QZZ7;G3X9K8	Q7TNI6;Q923U0;A6PWP3;Q923U0-3								Q9QZ83	Q9D0J2;Q4FK74;Q9D3D9;Q9DCZ0	Q6PB44-2;Q6PB44
	E9Q4D5;Q8VEL9;Q8VEL9-2	Q4W8U9																Q3TWY6;Q9Z160;Q3TR89;Q3TAY0;Q3U7X8;Q810S7;Q3TYM3								Q8QZZ7;G3X9K8	E9Q1G8;Q8C2A3;E9Q9F5;O55131;Q3UNN1;Q5DTS3	A1BN54;Q7TPR4								E9Q1G8;Q8C2A3;E9Q9F5;O55131;Q3UNN1;Q5DTS3	Q9QZ83	Q3UGY8
	Q58EU1;Q8BWU5;Q3UQ67;E9QMF4;E0CYN9	Q68EF0																Q3UE40;P27601								Q9D0J2;Q4FK74;Q9D3D9;Q9DCZ0	Q9D0J2;Q4FK74;Q9D3D9;Q9DCZ0	Q8R2Y8								Q8C2D1	D3YWX2;E9Q803;F6YTL8;Q9R0I7	Q8C561-2;Q8C561;Q8C561-3
	Q5FW97;P17182	Q6P6I7;A2AL12;Q5FB19;Q3UZG3;Q8BG05;Q5U3M2																G5E829;Q8K314								Q7TMN7	Q7TMN7	Q6P1F1;E9Q6B6;E9Q6E0;Q8CHB5;Q6NV54;Q3UHB5;J3QNR6;K3W4S4;Q9ESN9-2;Q9ESN9-3;Q9ESN9-5;Q9ESN9-4;Q9ESN9;Q9ESN9-6								Q9D7S9	E9Q1G8;Q8C2A3;E9Q9F5;O55131;Q3UNN1;Q5DTS3	G3X9K3;D3YYK9
	Q9D881;P19536	Q922F6																Q542P8;O35130								Q3TJ01;Q99LF4	F8VQ28;Q8VI36-2;Q8VI36;Q3UG90	Q6NZR5;Q3TW36;Q8CDP6;O70349;Q8R3X0;Q3TE28								D3YWX2;E9Q803;F6YTL8;Q9R0I7	Q99LB6	E9PV41;Q5DTQ4;E9PXV7;O08808;Q6NS79;D3Z074
	Q921W2;Q545C1;P70318;D6RGU1	Q99JB2;A2AG39;F6WI02																P61961;H7BWZ1;D3YW97								E9QN52;Q91WK0-2;Q91WK0	Q3TJ01;Q99LF4	Q8C1X9;Q3U737;O35639;Q3TFK4;Q3TET3								Q99LB6	Q5FWJ9;Q3UDG5;Q3U2X1;Q3TFE2;Q63850;Q3UGJ7;Q3THR9	Q8C1Z9;F6V6T4;A2RS53;Q9R0Q3;Q3THL1;Q8BPI2
	O35654;A8Y5G7	P43274																Q564F2;Q64520								F8VQ28;Q8VI36-2;Q8VI36;Q3UG90	E9QN52;Q91WK0-2;Q91WK0	P70245;A2AC29								O55234	O55234	Q3TA69;E9Q912;E9Q6Q4;Q3TU36;Q3TPS9;Q8BKH0
	A0PJL3;Q6PDS3;Q6PDS3-3;Q6PDS3-2	Q9R0P4;D6RI64																E9PYJ7;Q6ZPQ6-2;Q6ZPQ6;Q6NS55;Q3UEE4								E0CYJ0;E0CXA9;Q3UGM5;Q6PEB6;G8JL35	Q9D7X8	Q8CIE6;Q8BTF0;F8WHL2;Q63ZW9								Q99J77;Q9JJH0;Q3TFB5	Q9D7S9	Q4KMM5;Q3TIZ8;Q91XA2;Q3UZG0
	Q3UMU9;Q3UMU9-3;Q3UMU9-4;Q3UMU9-2	A0PJL3;Q6PDS3;Q6PDS3-3;Q6PDS3-2																O70423;O70423-2;A2A4I8								Q9D7X8	Q9Z0H8-2;Q9Z0H8;Q6A090	Q3UN48								B2RSN3;Q9CWF2;Q99J49	P62196;Q99KR1;Q8K1K2	Q4FE56;P70398
	Q9ERB0	Q60668-3;Q60668;Q3UXC8																Q542V3;Q8VE97;Q8K3A8;A2A837								Q9QZD9;Q3T9Y8	E0CYJ0;E0CXA9;Q3UGM5;Q6PEB6;G8JL35	A1ILG8;Q8BX70;Q8BX70-3;Q8BX70-2								Q5FWJ9;Q3UDG5;Q3U2X1;Q3TFE2;Q63850;Q3UGJ7;Q3THR9	Q99J77;Q9JJH0;Q3TFB5	Q91WM3
	Q60932-2;Q3U6K8;Q3TIG8;Q3THL7;Q60932;F2Z471	Q8N7N5;Q8N7N5-2																P62774								Q9Z0H8-2;Q9Z0H8;Q6A090	Q9QZD9;Q3T9Y8	Q2KN98;Q6GQV8;Q8CI53;Q8C9Q9								P62196;Q99KR1;Q8K1K2	B2RSN3;Q9CWF2;Q99J49	Q3UMR5;Q3UMR5-2
	Q3ULH5;Q3TXW2;Q3TVV6;Q8VEK3;O88568;G3XA10;Q3TWN5;Q3TGN5;Q3TS50	Q3U8Y7;Q3TKG4;O88685;Q3TKC2;A2AGN7;B7ZCF1;A0A087WPH7;Q3UD94																Q9WV92-7								Q7TQH0-2;Q7TQH0-3;Q7TQH0;Q3TGG2;E9Q5Q0;Q3TYH7	Q7TQH0-2;Q7TQH0-3;Q7TQH0;Q3TGG2;E9Q5Q0;Q3TYH7	E9PVP3;Q5F2B1;Q8C9V6;Q8R0J2;F6XX36;Q9R0Q9								Q059U9;Q9DBR0	P46471;Q3UIH5;Q8BVQ9;Q3U5V3	Q78IS1
	Q9R0P4;D6RI64	O88845;Q3TR91;O88845-3																Q3UMT1								Q6ZWX6	Q6ZWX6	E9QAH1;E9PVZ8;B2RWW2;Q571K1								Q60951;Q3UBT1;P62960;Q71V06;Q810K5;Q60950	P99028	Q3TDD9
	P63280;Q8CFZ0;G3UYP0	P63280;Q8CFZ0;G3UYP0																O88809;Q6PGI2;Q8C852;Q3V349;Q9CXL6								Q8BGD8	P70122;F6TN03	Q8C7F9;Q8C6H4;Q542E4;P58021;Q3TWB8								P46471;Q3UIH5;Q8BVQ9;Q3U5V3	Q059U9;Q9DBR0	B9EJ97;A2AG68;Q64430
	Q3TLQ4;P58064	P31750;Q8BS26;D3Z783;D3YXX3																Q91ZX7;Q3U454								P70122;F6TN03	Q8BGD8	Q8CHW4								P57759	Q60951;Q3UBT1;P62960;Q71V06;Q810K5;Q60950	Q3U5F9;Q9JJA2;Q3U184
	Q3UCF2;Q6A068;Q05DT4	D3Z7X0;D3Z2B3																Q80X48;Q99P88;Q3UL43;Q6ZQ45;Q8BUA6								Q1HFZ0;H3BKN0;Q1HFZ0-2	Q1HFZ0;H3BKN0;Q1HFZ0-2	P52875								P99028	P57759	A0A077K846;Q3TZM9;Q3TZM9-2;Q3TZM9-3
	Q99MR8	Q3U3H5;Q68FH4;Q8BUU7;Q3U728;Q8BWB2																Q9WV55								Q9CQ49;D3Z3D2	Q99JP4	Q925B0;Q925B0-2								Q3UTJ2	Q3UTJ2	Q0PD49;P61028;Q8BKQ0
	Q9Z2E1	Q8BH95;F6T930																V9GX40;V9GXD9;Q5SV85;Q5SV85-2								Q99JP4	Q8CGA0	P56375								Q9D0L8;Q9D0L8-2;Q9D0L8-3;D3YYS7;D3Z478	Q9D0L8;Q9D0L8-2;Q9D0L8-3;D3YYS7;D3Z478	Q9CYA0
	Q60668-3;Q60668;Q3UXC8	E9Q4D5;Q8VEL9;Q8VEL9-2																Q4FK79;Q9DCF9-2;Q9DCF9;Q3TS69								Q8CGA0	Q9CQ49;D3Z3D2	Q91WG2;Q91WG2-2;Q91WG2-1;Q3TZJ2								Q8VDC3;P28271	Q8BWR2;B1AV57;Q8BWR2-2	Q9DBU8;Q9JKC8;H7BWY2
	Q8K0U4;Q3TNR3	Q9WVJ3-2;Q9WVJ3;Q3U496																Q3UNZ1;Q99J23;Q3TT56;Q3UXS5								Q8C1B7-3;Q8C1B7-2;Q8C1B7	Q8C1B7-3;Q8C1B7-2;Q8C1B7	Q2TBE6								E0CYJ0;E0CXA9;Q3UGM5;Q6PEB6;G8JL35	Q8VDC3;P28271	Q3THH1;Q922R8
	Q9D0B6;Q9D0B6-2	Q8C570;Q8CBU3																Q6PB44-2;Q6PB44								D0EW11;Q8K5B2;Q99KV4;D3Z6A4;D3Z1G3	P48678;P48678-2;P48678-3	Q9D1M7								Q8BWR2;B1AV57;Q8BWR2-2	E0CYJ0;E0CXA9;Q3UGM5;Q6PEB6;G8JL35	P35283;A2CG35
	Q566K0;P17095;Q3TE85	Q9D287;Q05CL7;Q3U5M2																Q3TFP8;Q3TXU8;Q3TH84;O55022								P48678;P48678-2;P48678-3	D0EW11;Q8K5B2;Q99KV4;D3Z6A4;D3Z1G3	Q3TM85;Q3U3W2;B2RVR2;Q80TD8								B2CY77;P14206	B2CY77;P14206	Q8C0L8
	P70122;F6TN03	Q9CZX8;Q5M9P3;D3YUT3;D3Z722;D3Z5R8;D3YUG3																E9Q7H5;Q0VG47;J3QNY1;Q8BG05-2;Q6PFA7;B2RXM2								Q9DBE7;A2A5S3;Q3TWP5;Q641P2;Q3TJ07;Q3UTC8;Q3TU43;Q3TWA1;Q3UKX3;A2A5R8;Q3U8D3;Q9Z108;V9GX87;Q3U7A6;Q6TNG5	Q9DBE7;A2A5S3;Q3TWP5;Q641P2;Q3TJ07;Q3UTC8;Q3TU43;Q3TWA1;Q3UKX3;A2A5R8;Q3U8D3;Q9Z108;V9GX87;Q3U7A6;Q6TNG5	Q9CYW4								E9Q983;Q8K4L2;E9Q3Z5;Q8K4L3;E3VVQ8	P31750;Q8BS26;D3Z783;D3YXX3	Q6DI95;Q6P2B1;Q571K5;Q6P2B1-2;Q3UL39
	Q99JB2;A2AG39;F6WI02	Q91W39;Q8BX12;B7ZC24																Q8R332-2;Q6ZQC2;Q3UZQ6;Q8R332-4;Q8R332-3;Q8R332								Q3UK83;Q3U7F3;Q3TIK8;Q5EBP8;P49312;Q3TFB1;P49312-2	Q3UK83;Q3U7F3;Q3TIK8;Q5EBP8;P49312;Q3TFB1;P49312-2	Q3UKA4;P00329								P31750;Q8BS26;D3Z783;D3YXX3	E9Q983;Q8K4L2;E9Q3Z5;Q8K4L3;E3VVQ8	Q5PPQ7;Q499X7;Q9WUM4;Q3TF74;Q3TEU8
	Q9WUM5	O35654;A8Y5G7																P63024								Q61699;Q61699-2;E9Q0U7	Q61699;Q61699-2;E9Q0U7	B9EKJ3;Q80TL7-2;Q80TL7								F8VQ28;Q8VI36-2;Q8VI36;Q3UG90	F8VQ28;Q8VI36-2;Q8VI36;Q3UG90	Q80UU9
	Q3UZ58;Q61578	Q3UCF2;Q6A068;Q05DT4																D3YXZ5;Q91WT8;Q91WT8-2;D3Z113								O70251;A0A087WS46	O70251;A0A087WS46	A2AN37;P52623;F7CBX2								Q99KP6;Q99KP6-2;Q4ADG5;Q99KP6-3	Q99KP6;Q99KP6-2;Q4ADG5;Q99KP6-3	Q4TVN0;Q9CXF4;Q7TPU5
	Q91W39;Q8BX12;B7ZC24	Q9QZE7;Q3TXK6																Q3U0T9;Q6PHN9								Q3U8Y7;Q3TKG4;O88685;Q3TKC2;A2AGN7;B7ZCF1;A0A087WPH7;Q3UD94	Q3U8Y7;Q3TKG4;O88685;Q3TKC2;A2AGN7;B7ZCF1;A0A087WPH7;Q3UD94	Q4FJY3;Q62313								B2RRE0;Q9WTQ5;Q9WTQ5-2	Q7TMN7	Q8R1H0
	P50516;P50516-2	D3YZ62;D3Z4J3;Q99104																Q78JW9;Q9CYA9								Q3U647;Q60967;Q6NZM8;Q3TUA8	Q3U647;Q60967;Q6NZM8;Q3TUA8	Q3UW53;E9PYV4;Q3TDH5								Q7TMN7	B2RRE0;Q9WTQ5;Q9WTQ5-2	F8VPK0;Q6ZQC8
	O88845;Q3TR91;O88845-3	Q3U8D2;Q99L47;Q3U9V1;Q3U3N7;F8WJK8;Q3TGW8																Q3TTF6;H3BKU1;Q8BIX1;G3UWS4;Q7TNP2;H3BLQ0;H3BLE7;H3BIV7								Q9CRB6;Q1JPR8	Q8CAJ7;Q3U3I6;Q3TVK3;Q9Z2W0;Q8BPW9	A8DUK4;A8DUK7;A8DUQ5;A8DUQ1;A8DUL2;A8DUL0;A8DUP0;A8DUL7								Q9DC07	Q3ULG4;O35226-2;O35226-3;O35226-5	R4H4V1;R4H4Y7;Q9EQC5
	Q6P6I7;A2AL12;Q5FB19;Q3UZG3;Q8BG05;Q5U3M2	Q3UJR8;Q64152-2;Q64152																P60898;D3Z3Z8;D3YYI3								Q8CAJ7;Q3U3I6;Q3TVK3;Q9Z2W0;Q8BPW9	Q9CRB6;Q1JPR8	Q0PD49;P61028;Q8BKQ0								Q3ULG4;O35226-2;O35226-3;O35226-5	Q9DC07	Q3TGM7;Q69ZS7;Q3UJ02;Q69ZS7-2
	Q8QZT1;Q3TQP7	Q99JP4																Q9EQU5-2;A2BE93;Q3T9S3;Q9EQU5;A2BE92;Q5U445								O70194	G3UYV7;Q059I1;P62858	Q9D1M4								Q3TJ01;Q99LF4	Q6ZWX6	Q3TTF6;H3BKU1;Q8BIX1;G3UWS4;Q7TNP2;H3BLQ0;H3BLE7;H3BIV7
	Q9QZE7;Q3TXK6	Q9D881;P19536																E9PXX7;Q3TEE8;Q91W90;Q3UBW8;Q3UWX1								G3UYV7;Q059I1;P62858	O70194	Q8CI32								Q6ZWX6	Q3TJ01;Q99LF4	Q80W22
	Q3U8Y7;Q3TKG4;O88685;Q3TKC2;A2AGN7;B7ZCF1;A0A087WPH7;Q3UD94	P57759																B2RPW5;G3X9A7;Q8BLJ3								Q8BTX5;Q5M9L0;Q3TII2;Q91WK2;Q3THW7;Q3TIK5	Q8BTX5;Q5M9L0;Q3TII2;Q91WK2;Q3THW7;Q3TIK5	Q4PJX1;Q4PJX1-3;Q4PJX1-2								Q9QZD9;Q3T9Y8	Q8QZZ7;G3X9K8	Q8CIE6;Q8BTF0;F8WHL2;Q63ZW9
	Q9Z315	Q3UMU9;Q3UMU9-3;Q3UMU9-4;Q3UMU9-2																I6L960;G3X9Y5;Q6A0C5;E9Q735								A2A5Y6;P10637;P10637-6	A2A5Y6;P10637;P10637-6	Q8K0F1								Q8QZZ7;G3X9K8	Q9QZD9;Q3T9Y8	Q8C4C9;Q9QYI4;D6RHR9
	D3YZ62;D3Z4J3;Q99104	Q3ULH5;Q3TXW2;Q3TVV6;Q8VEK3;O88568;G3XA10;Q3TWN5;Q3TGN5;Q3TS50																Q505D7								Q61655	Q61655	Q9WVP1-2								E9QN52;Q91WK0-2;Q91WK0	P70122;F6TN03	Q8C1X9;Q3U737;O35639;Q3TFK4;Q3TET3
	Q6F4J1;P83887;Q6F4J0;Q8VCK3	Q3UZ58;Q61578																Q9D365								Q80T06;Q91VK2;P57776;E9QN08;D3YY68;D3YUQ9;D3YZT9	Q80T06;Q91VK2;P57776;E9QN08;D3YY68;D3YUQ9;D3YZT9	A2AA71;Q3U2P1								P70122;F6TN03	E9QN52;Q91WK0-2;Q91WK0	E9QQ99;D3Z1Y1;Q9DBY1;D3YZH4;Q9DBY1-2
	Q3UJR8;Q64152-2;Q64152	F6ZDS4																Q922Q1;F6UB20								P54775;Q569X4;Q3TFA5;Q8BKU2;Q3TJ97;Q3UBF0;Q52L53	P54775;Q569X4;Q3TFA5;Q8BKU2;Q3TJ97;Q3UBF0;Q52L53	Q9JKY0								Q7TQH0-2;Q7TQH0-3;Q7TQH0;Q3TGG2;E9Q5Q0;Q3TYH7	Q7TQH0-2;Q7TQH0-3;Q7TQH0;Q3TGG2;E9Q5Q0;Q3TYH7	B1AZI6;Q3US09
	Q9D1I5	Q91VR5;Q922B8;Q3V1Z7																Q544Z6;Q3TXJ7;Q07813;Q8K3J2										A2AQ53;O88840;Q61554;Q60784								Q9CQ49;D3Z3D2	Q9D7X8	E9QMU3;D3YWN7;O88735-2
	Q3TDE6	Q60932-2;Q3U6K8;Q3TIG8;Q3THL7;Q60932;F2Z471																Q61686										A2RRJ4;Q924C1								Q9D7X8	Q9Z0H8-2;Q9Z0H8;Q6A090	Q9EQU5-2;A2BE93;Q3T9S3;Q9EQU5;A2BE92;Q5U445
	P31750;Q8BS26;D3Z783;D3YXX3	Q6F4J1;P83887;Q6F4J0;Q8VCK3																Q9CYA0										Q8CD95;Q3U3C3;E9QKQ5;Q80XT6;Q91ZP3-2;Q91ZP3;Q8CFH3								Q9Z0H8-2;Q9Z0H8;Q6A090	D0EW11;Q8K5B2;Q99KV4;D3Z6A4;D3Z1G3	Q3U0D7;P62331
	Q9CZX8;Q5M9P3;D3YUT3;D3Z722;D3Z5R8;D3YUG3	Q9Z315																A2AGL5;Q496S6;Q496R6;Q9D9K3										Q0VGN4								D0EW11;Q8K5B2;Q99KV4;D3Z6A4;D3Z1G3	Q9CQ49;D3Z3D2	Q8BU30
	Q4VBX4;Q9D2M8;A6X925;Q9D2M8-2	Q9WUM5																Q9CQ28;Q9CQ28-3;Q9CQ28-2										Q8BP47								Q8C1B7-3;Q8C1B7-2;Q8C1B7	Q99JP4	A2AN08-3;A2AN08;A2AN08-5;A2AN08-2
	Q8C570;Q8CBU3	Q8K0U4;Q3TNR3																R4H4V1;R4H4Y7;Q9EQC5										Q9JIK5;Q6PCP0;Q3ULC7;Q9CWZ5;Q8K2L4								Q99JP4	Q8CGA0	A2AGL5;Q496S6;Q496R6;Q9D9K3
	Q3UJB0;Q3UAI4;Q80W39;Q3UBH2;Q3UQU5;Q8BL33	Q9D1I5																Q545I9;P14069										Q14DR9;Q8R2E9								Q8CGA0	Q8C1B7-3;Q8C1B7-2;Q8C1B7	Q3UNI1;Q53Z05;Q923E4;A7MCT8;Q923E4-2
	D3YYT1;Q922P9	Q9Z2E1																Q9D394-2										Q9CXR1								Q8BGD8	Q8BGD8	Q8R3L2;B2ZAC8;Q8R3L2-3;Q8R3L2-2;Q8R3L2-5;Q8R3L2-4;Q80TL2
	B1GX80;B1GX81;Q61036-2;Q61036;A3KGC5	Q3UK33;O08908;F7CB91																Q4V9Z5-3;Q4V9Z5-2;Q4V9Z5										Q6DFZ1;Q6A099								P48678;P48678-2;P48678-3	P48678;P48678-2;P48678-3	Q9DBZ6;Q3U645;P55096;Q3UNS0
	P57759	P50516;P50516-2																Q3UHH0;Q3UHJ3;F8WHB1;D5L240;Q9R0K7;S4R1C4										P98203-3;P98203-4;P98203-5;P98203-2;P98203								Q9DBE7;A2A5S3;Q3TWP5;Q641P2;Q3TJ07;Q3UTC8;Q3TU43;Q3TWA1;Q3UKX3;A2A5R8;Q3U8D3;Q9Z108;V9GX87;Q3U7A6;Q6TNG5	Q9DBE7;A2A5S3;Q3TWP5;Q641P2;Q3TJ07;Q3UTC8;Q3TU43;Q3TWA1;Q3UKX3;A2A5R8;Q3U8D3;Q9Z108;V9GX87;Q3U7A6;Q6TNG5	H3BJU7;H3BJX8;H3BJ45;H3BJ40;H3BKH9;Q60875-5;Q60875-4;Q60875;Q3TYZ4;Q60875-2;Q60875-3
	F6ZDS4	Q3UJB0;Q3UAI4;Q80W39;Q3UBH2;Q3UQU5;Q8BL33																Q3UD03;Q3U199;Q3TCV9;Q6NSR8										P27612								Q3UK83;Q3U7F3;Q3TIK8;Q5EBP8;P49312;Q3TFB1;P49312-2	Q1HFZ0;H3BKN0;Q1HFZ0-2	A3KMJ8;P61759;Q3TIR6
	Q9CSS1;E9PZM7;Q6ZPE9;Q7TML8	Q566K0;P17095;Q3TE85																Q91XB7										Q4PZA2-3;Q4PZA2-4;Q4PZA2;Q4PZA2-2								Q1HFZ0;H3BKN0;Q1HFZ0-2	Q3UK83;Q3U7F3;Q3TIK8;Q5EBP8;P49312;Q3TFB1;P49312-2	P99027
	Q99JP4	Q9D0B6;Q9D0B6-2																Q99K23										B2RQC6;E9QAI5;G3UWN2;B2RQC6-2;Q6P9L1								O70251;A0A087WS46	O70251;A0A087WS46	Q9ES64-3;H3BIZ2;H3BLC4;D6RIM8;Q6XA19;E9PYX1;E9QMN1;Q9ES64-2;Q9ES64
	Q91VR5;Q922B8;Q3V1Z7	Q9CWJ9																Q9CQ88										Q6NXL1;Q80V21;Q8R0M3								Q61699;Q61699-2;E9Q0U7	Q61699;Q61699-2;E9Q0U7	Q0VBU4;Q9D024-2;Q9D024;F7C265;Q9D024-3
	B2RQS1;Q9ERG2	D3YYT1;Q922P9																Q501L4;Q3UAY3;Q8BMQ2;Q3UJL1;E9Q2B0;Q8BMQ2-2										Q5RKN9;Q3UAS2;Q3UJV2								Q8CAJ7;Q3U3I6;Q3TVK3;Q9Z2W0;Q8BPW9	Q8CAJ7;Q3U3I6;Q3TVK3;Q9Z2W0;Q8BPW9	Q80U95
	Q9D287;Q05CL7;Q3U5M2	Q99LX0;A2A813;A2A815																F8VPK0;Q6ZQC8										Q4TVN0;Q9CXF4;Q7TPU5								O70194	O70194	Q3UXD9;Q99MZ7
	Q9CU62;A0JLM6	B2RQS1;Q9ERG2																P19096;Q3UHT6;Q3TB22										Q8BSX8;Q9EQG9-2;Q9EQG9;Q9EQG9-3								Q3U647;Q60967;Q6NZM8;Q3TUA8	Q3U647;Q60967;Q6NZM8;Q3TUA8	Q8BLV3;Q8BLV3-2
	Q9CWJ9	Q4VBX4;Q9D2M8;A6X925;Q9D2M8-2																E9Q8T1										Q9JI78								G3UYV7;Q059I1;P62858	G3UYV7;Q059I1;P62858	B9EIX2;Q80U49
	P63038	E0CY18;A0A087WPF5;Q91X58																Q9D0I9;Q3TVC5;Q3UAZ3										Q9DBQ7;Q9DBQ7-3								Q3U8Y7;Q3TKG4;O88685;Q3TKC2;A2AGN7;B7ZCF1;A0A087WPH7;Q3UD94	Q3U8Y7;Q3TKG4;O88685;Q3TKC2;A2AGN7;B7ZCF1;A0A087WPH7;Q3UD94	B2RTB0;Q3UHX2;Q1WWJ8
	Q9Z2H7	Q9CXI0																Q544T5;P00375										Q8C1Z9;F6V6T4;A2RS53;Q9R0Q3;Q3THL1;Q8BPI2								Q8BTX5;Q5M9L0;Q3TII2;Q91WK2;Q3THW7;Q3TIK5	Q8BTX5;Q5M9L0;Q3TII2;Q91WK2;Q3THW7;Q3TIK5	Q8C1D0;Q6ZWQ7
	Q78XF5	E9QN44;Q8CIM3																Q6ZWR6-4;Q6ZWR6										P19096;Q3UHT6;Q3TB22								Q9CRB6;Q1JPR8	Q9CRB6;Q1JPR8	Q99J27
	Q3U0F3;Q91VK4;A0A087WRM2	Q8QZT1;Q3TQP7																Q8BMA6;A2AAN2;Q8K258										Q9JIS5								Q80T06;Q91VK2;P57776;E9QN08;D3YY68;D3YUQ9;D3YZT9	Q80T06;Q91VK2;P57776;E9QN08;D3YY68;D3YUQ9;D3YZT9	E9Q3Y4;Q9ESE1;Q9ESE1-2;Q9ESE1-3
	E0CY18;A0A087WPF5;Q91X58	Q8BTX9																Q62261										A2AQL0;Q9Z1W9;G1JLS7;Q3V256								A2A5Y6;P10637;P10637-6	A2A5Y6;P10637;P10637-6	Q9CXK3;Q497E4;P68033;Q3UIJ3;Q3TG92;Q61275;P68134;Q61264;Q61272
	E9QN44;Q8CIM3	Q9CU62;A0JLM6																Q9CPY7-2;Q9CPY7										Q9JJ06								Q61655	Q61655	Q3UU20;Q8R1F6-2;Q8R1F6
	P08030	B1GX80;B1GX81;Q61036-2;Q61036;A3KGC5																E9QP59;D3YU56;Q9WU40;Q9WU40-2										Q3U344;P84078;P61205								P54775;Q569X4;Q3TFA5;Q8BKU2;Q3TJ97;Q3UBF0;Q52L53	P54775;Q569X4;Q3TFA5;Q8BKU2;Q3TJ97;Q3UBF0;Q52L53	B2RSC8;P46935
	A2ACL9;Q62443;Q3UST4	Q99MR8																Q6ZWY3;D6RH49;D3YYB0										Q8BIL5;Q8BIL5-2										Q6PD19;Q6PD19-2
	Q99K87;Q3TFD0;Q9CZN7	Q9CSS1;E9PZM7;Q6ZPE9;Q7TML8																Q9ES64-3;H3BIZ2;H3BLC4;D6RIM8;Q6XA19;E9PYX1;E9QMN1;Q9ES64-2;Q9ES64										E9Q411;Q6GQV6;Q80XK8;Q6PGH6										Q8K2C7
	Q9CXI0	Q3TDE6																Q571I9;D3Z0B9										Q9CQ28;Q9CQ28-3;Q9CQ28-2										Q6P1B9;O08539-2;O08539
	Q5SUT0;Q3UI30;Q6NVA3;Q5SUS9;Q61545;Q9CRS5	E9Q4Q2;D3YZC9;D3YZD0;Q3UK67;Q3UI45;Q64213-2;Q64213-3;Q64213;Q3TZI3;D3YVH4																H7BX26;Q6A065										Q5PPQ7;Q499X7;Q9WUM4;Q3TF74;Q3TEU8										Q7TNI6;Q923U0;A6PWP3;Q923U0-3
	S4R2J9;Q3TLH4-5;Q3TLH4;S4R294	Q5SUT0;Q3UI30;Q6NVA3;Q5SUS9;Q61545;Q9CRS5																Q8C9S4										Q9CQB5										Q8BKE6;Q80Y48
	B1AU76;B1AU75;Q99MD9-2;Q99MD9	Q3URU2;Q3URU2-2;Q0P5Y8																Q8BHE8										A5A8K4;D3Z118;P97411;P97411-2;S4R217;D3Z376;D3Z119										I7HPY1;I7HLV5;Q9D8T0;I7HJS7;J3JS95
	Q9JMH6-2;Q9JMH6	P60335																Q3UIA4;Q9JHW9										Q4V9Z5-3;Q4V9Z5-2;Q4V9Z5										Q3TI70;Q8BGR2
	P49813	Q99K87;Q3TFD0;Q9CZN7																Q3UW53;E9PYV4;Q3TDH5										Q61510										Q6DFZ1;Q6A099
	Q8BTX9	P08030																Q569X3;Q62241										Q9DBU8;Q9JKC8;H7BWY2										D4AFX6;Q6ZQK5;Q6ZQK5-2
	P50429;B2RWQ7;P50429-2	Q9Z2H7																Z4YJW0;A1L2Z3;Q8C7X2-2;Q8C7X2										Q14CH7										Q80X80;Q8CAA2;Q3U590;Q9DBJ2;Q6PHC0;Q80U48;Q8CFV7
	E9Q4Q2;D3YZC9;D3YZD0;Q3UK67;Q3UI45;Q64213-2;Q64213-3;Q64213;Q3TZI3;D3YVH4	F7DEU6;P50096;E0CYE2																Q545R0;Q3TGQ3;P26231;Q6NV50										J3KMG3										G5E896;Q3UJB9;D6RE33;Q3UJB9-2
	P18608;D3Z607;Q8CEW1	P49813																H3BKT0;H3BJN3;Q6AXG1;Q9JJB6;H3BJ26;H3BLJ7										Q8BTY8;Q3UPD0;Q8BTY8-2;Q3UXF7;D3Z4T4										Q8VD04;A2AEW8;A2AEW9;A2AEW5;A2AEW6
	Q2TPA8;Q9D015;Q99JH2;B1AX78	P62077																Q3TCH7;Q8R1T2;Q3UD60										Q3TFE8;Q7TSZ6;P70168;Q3UHW8										E9PVP3;Q5F2B1;Q8C9V6;Q8R0J2;F6XX36;Q9R0Q9
	P97300;P97300-1;H3BIX4;Z4YLB7;P97300-3	Q2TPA8;Q9D015;Q99JH2;B1AX78																Q5SUC3;P35564;Q3TXE5										F8VPK0;Q6ZQC8										Q9CXW4;E9PYL9;Q8VC94;A2BH06
	Q2M2Q8;Q3TE41;Q920Q6-3;Q920Q6-2;Q920Q6;B1AT13;Q8CD63;Q32LZ4	S4R2J9;Q3TLH4-5;Q3TLH4;S4R294																B2RY56;S4R2B0										Q9JKK7;Q9JKK7-2										Q3U706;Q91XC8;A0A087WR57
	Q99LX0;A2A813;A2A815	Q8K2H2																Q9DBR1-2;Q9DBR1										D3Z5I1;Q3UPF5-2;Q3UPF5;G3X9X5;Q8K302										Q6ZWY3;D6RH49;D3YYB0
	P60335	Q9JJE1;Q3U3F4;Q3TMJ8;P31938;Q3UK05;Q3TMW4																Q3UKU3;Q9NWG9										P17426-2;P17426										Q9BCZ4
	Q8VDM1;F7C2Y9	Q9DBF1-2;Q9DBF1;G3UYR8																Q9JKB3-2;Q68G78;Q9JKB3;Q61478;Q64369;Q8BPG0										Q8C5F9;A9CLV6;Q9QZI8										Q99LL5;E9QAL6;Q9CTC0;Q9CSK2;Q8BW04
	Q3UK33;O08908;F7CB91	P63038																Q61206;Q8BTA2										Q8BFW6										O88630;Q80UU0
	P62077	Q6P1J1;Q3TXY0;P97427;Q3TY94																Q8BJ71										Q4FK14;Q3UQ93;Q3ULV0;Q3UAT2;Q91V04;Q9CVJ6										Q8CBB7;Q3UKX8;P22892;Q8CC03
	Q9CQ92;G3X9U9	Q3UK83;Q3U7F3;Q3TIK8;Q5EBP8;P49312;Q3TFB1;P49312-2																Q0VBU4;Q9D024-2;Q9D024;F7C265;Q9D024-3										Q14C53;A0A068BIT0;Q31125										P68368
	Q3UGB5;Q9JII5-2;Q9JII5;Q3U878;D3Z4J1	Q78XF5																G3X9K3;D3YYK9										Q99JW5										E9PXX7;Q3TEE8;Q91W90;Q3UBW8;Q3UWX1
	Q3URU2;Q3URU2-2;Q0P5Y8	P18608;D3Z607;Q8CEW1																Q99J27										Z4YJR1;Q3U3R4-2;Q3U3R4;Q3U3R4-3										Q8K221
	Q9JJE1;Q3U3F4;Q3TMJ8;P31938;Q3UK05;Q3TMW4	Q8BK67																B9EKQ1;A3KGB4										F6UIS1;Q9CQE7;Q9CQE7-2;F6RK81										Q9CQU3
	Q8VDM6-2;Q8VDM6	Q3U0F3;Q91VK4;A0A087WRM2																Q3UDC8;P58252;Q8BMA8;Q3UZ14;Q3UMI7;Q3TX47;Q3TK17;Q6P9L9;Q3TWX1;Q3TLB1;Q3TJZ1;Q8C153;Q3UBL9;Q3TW58										Q9EPE9;Q69Z96										Q3TFQ1;Q3UBW1
	Q8BK67	B1AU76;B1AU75;Q99MD9-2;Q99MD9																Q8CCP0;Q8CCP0-2;Q8CCP0-3										O54692										Q3U944;Q9D0F3
	Q8BV13;Q3TDL0	Q8VDM6-2;Q8VDM6																Q8CGB3;Q8CGB3-3;Q8CIA8;Q8CGB3-2										Q8BH01-3;Q8BH01-2;Q8BH01										Q3TJD0;P61620
	F7DEU6;P50096;E0CYE2	Q9CQ92;G3X9U9																Q8C561-2;Q8C561;Q8C561-3										A2ACP1-2;A2ACP1										Q9QZE5
	P80316	Q9QZ83																E9QAS4;E9QAS5;Q5DTP7;Q6PDQ2;Q99JM0										E9Q8T1										Q9D1D4
	Q8K4Z5;Q3TVM1	A2ACL9;Q62443;Q3UST4																Q540P4;Q9EPC5;F6R1Y3										Q3UIP1;A2AER4;Q9R0M8										Q91XB7
	Q505L1;Q3TF62;Q9Z2N8	Q2M2Q8;Q3TE41;Q920Q6-3;Q920Q6-2;Q920Q6;B1AT13;Q8CD63;Q32LZ4																Q6DI95;Q6P2B1;Q571K5;Q6P2B1-2;Q3UL39										Q8R1F1										F8WGX5;Q6PNC0
	Q8R086	Q9EQF6																P28651										Q9JK38;Q3THZ8										H3BK48;H3BKH2;E9Q3S2;H3BJS0;Q8R311;H3BL19;Q3TZZ3;H3BJI6;H3BK44;E9PY90;H3BKL6;H3BJ71
	Q8R4X3;Q6ZQ53;F6YJB6;V9GXJ1	Q52KC5;Q9CQP3																G3UXW9;Q3MIA8;Q99LD4;B1ATU4;Q99LD4-2										P47856-2;P47856										Q9D8Y1
	Q8K2H2	Q8K4Z5;Q3TVM1																Q6GQU1;Q3UPC4;Q3TJE3;P17710-3;Q3UE51;G3UVV4;P17710-4;P17710;P17710-2;Q3TTB4										Q544R7;Q3U6W4;O70252;D3YX62										A2A9Q2;Q8BHG1;Q8R320;A6PWC3;Q8CIJ0;Q8R1H1
	Q99K28;Q99K28-2	Q3UGB5;Q9JII5-2;Q9JII5;Q3U878;D3Z4J1																G5E8C4;Q8BRH0										O08529;Q3U3A8;Q3U8S5;Q8R486;Q8BPV9										P81117
	Q9QZ83	Q5SUR0																Q3TI70;Q8BGR2										O54774;Q3U237;Q3UR54;Q8CGH7;Q05CQ3										Q68FH8;Q61466-2;Q61466
	B2RTM0;P62806	Q8R050-2;Q8R050;Q8CCV1;Q8BPH0;Q3UL02																Q3U5X7;Q3TXN3;Q921V5;Q3TBY6										Q8BI84;Q8BI84-2										Q6NV83-2;Q6NV83
	Q9DBF1-2;Q9DBF1;G3UYR8	Q9JMH6-2;Q9JMH6																Q9Z186										Q8BJT9;Q8BJR2;Q91VV3;Q8BK85										Q921M8;Q3TEX8;P35123;Q6NXV6;Q5DTK8;Q3TPN5
	Q5SUR0	P97300;P97300-1;H3BIX4;Z4YLB7;P97300-3																Q3UCW0;Q61187;Q3UK08										E9Q3Y4;Q9ESE1;Q9ESE1-2;Q9ESE1-3										P50544;B1AR28;Q3UJR6
	Q9WVA2	Q9CPQ1																Q3UD58;Q6PAM1;Q3UXT5;Q6PAM1-2										Q62277;A4FUR8										Q5XJF6;P53026;Q3U561
	Q9EQF6	P80316																Q4ACU6;Q4ACU6-2;Q4ACU6-3										Q9ERI6;Q569U9;Q3UQM5										Q6ZPJ3
	Q9CPQ1	Q8R4X3;Q6ZQ53;F6YJB6;V9GXJ1																Q6PDL0										S4R1X1;Q7TMQ7										Q5RKN9;Q3UAS2;Q3UJV2
	Q8R050-2;Q8R050;Q8CCV1;Q8BPH0;Q3UL02	P70333																Q3UQM7;Q9Z127;Q3UG45										E9PVU0;E9Q175;E9Q3L1;B2RWR8										Q8CHW4
	Q3UK83;Q3U7F3;Q3TIK8;Q5EBP8;P49312;Q3TFB1;P49312-2	P50429;B2RWQ7;P50429-2																Q8BTY8;Q3UPD0;Q8BTY8-2;Q3UXF7;D3Z4T4										Q0PD50;Q3UHW5;P55258										Q99LG2;Q3U316;E9PV58;Q3U1S0
	Q3UMF0-3;B1AZ15;B1AZ14;Q3UMF0-4;Q3UMF0-2;Q3UMF0	Q8VDM1;F7C2Y9																Q8CBB7;Q3UKX8;P22892;Q8CC03										E9Q512;H3BJG4										Q99M51;Q8BH99;Q8BMV0;Q8BZ27;A0A087WSB1
	Q52KC5;Q9CQP3	B2RTM0;P62806																Q9D187;F8WHV1										B2RSC8;P46935										Q8K0F1
	Q91VM5	Q505L1;Q3TF62;Q9Z2N8																P68368										Q9QXB9										B9EKJ3;Q80TL7-2;Q80TL7
	Q6P1J1;Q3TXY0;P97427;Q3TY94	Q9CSH3;Q8R2P7																A2CES4;Q9CQI7										Q3U896;Q9Z2D0										Q3UG80;Q8R307;Q69ZI9;Q8CFS5;Q8BLK7;Q3U7D9
	Q9CSH3;Q8R2P7	Q8BV13;Q3TDL0																E9PV45;B1AY13										P06745;B7ZWL9										S4R1P5;Q91ZU6-4;E9Q9X1;Q91ZU6;Q91ZU6-3;A0A087WSP0;Q91ZU6-2
	B2CY77;P14206	Q78HU3																Q3UIG0;P60229;Q9CT23										Q9CTE8;Q9DB25										Q99LG0;D3YVU1
	Q78HU3	B2CY77;P14206																Q5DQR4-4;Q5DQR4-3;Q5DQR4-5;Q5DQR4-2;Q5DQR4;B2RQE5;B7ZN50;B7ZN48;B7ZN49;Q5DQR4-6										Q9CR60										Q9CXR1
	Q5DTL0;Q9EQG7;Q5FWJ8	Q3TH46;Q3U111;P26043;Q7TSG6;Q8C2N4;Q05CE6																Q9Z2X8;Q05DM3;Q3UWI4										Q61025;Z4YJL9;Q61025-2										B1ARU4;E9PVY8;E9QA63;Q9QXZ0;E9QNP1;Q9QXZ0-3;Q9QXZ0-2;Q9QXZ0-4;F6Q750
	Q9JMG7;Q9JMG7-2;Q3TR90	Q3UMF0-3;B1AZ15;B1AZ14;Q3UMF0-4;Q3UMF0-2;Q3UMF0																Q8VC31;G3X927;D3YW42										Q8BYA0										A2AFS3
	Q8K0D5	Q9WVA2																Q8BU30										B9EHY2;Q80W54										D3Z780;Q61749;Q61749-2
	P61022;B0R091	P99028																A2AQ53;O88840;Q61554;Q60784										Q3TFP8;Q3TXU8;Q3TH84;O55022										Q8BWV2;G3X8X7;Q920Q4;Q920Q4-2;Q8C016
	Q8K370;Q9CRH8	Q91VM5																G5E8R4;Q922D4-2;Q922D4;Q922D4-3;Q922D4-4										Q4FJX4;P97315										E9Q3B9;D3YYS6;O35678;Q3UFX6;Q3UFN1
	Q3TH46;Q3U111;P26043;Q7TSG6;Q8C2N4;Q05CE6	Q99K28;Q99K28-2																Q922Q8;Q3TF84										E9PVC5;Q6PD42										P28740-2;E0CZ72;P28740;P28740-1
	Q8K209	Q8K209																Q99LI7;Q3TXN6										B1ARU4;E9PVY8;E9QA63;Q9QXZ0;E9QNP1;Q9QXZ0-3;Q9QXZ0-2;Q9QXZ0-4;F6Q750										A2AA71;Q3U2P1
	P99028	Q9JMG7;Q9JMG7-2;Q3TR90																B2RSC8;P46935										Q3TDM8;E9Q855;Q3UK26;Q3UXS0;O35609;B2M0S2										Q8R3D5;P57016
	Q5SVF7;O55125;Q3UGS1;Q5SVG6	Q8R086																Q9CQT1;F6YY88;F8WI95										B7ZMR0;Q76LS9-2;Q76LS9										Q8CID3
	Q8CH18;Q8CH18-3	Q8K0D5																P49817;H3BKG0;H3BLK5;D3Z148;P49817-2										H3BL26;Q99L96;Q3TV84;O70401										Q3U311;Q03157;Q3TCA7;Q3TUB1
	P70333	Q6P1B6;Q6NZN9;Q8BH69																Q9CRC8;Q78KN5										Z4YJW0;A1L2Z3;Q8C7X2-2;Q8C7X2										Q6GTY4;Q9Z2G6-2;J3QJX3;Q5DTL8;Q9Z2G6
	E9Q1P8	Q61655																Q8R5J9										Q91XU3										Q9D0I9;Q3TVC5;Q3UAZ3
	Q8VDC3;P28271	P61022;B0R091																P84084										F8VPU2;Q8K2R0										Q9D8S3
	Q14AI7;O88544;D3YV99;F6QTS1;D3Z1R9	Q8CH18;Q8CH18-3																Q99LD8;O08972										Q3UD58;Q6PAM1;Q3UXT5;Q6PAM1-2										Q69ZX3;E9QPE7;Q8R384;O08638;O08638-2
	Q3UBA6;P63017;Q3U9L2;Q3TEK2;Q504P4;Q3TRH3;Q3TQ13;Q3ULM1;Q3TH56;Q3TZJ3;Q3KQJ4;Q3UDS0;Q3TH04;Q3TB63;Q3UXU1	Q8VDC3;P28271																Q4FE56;P70398										Q9QZE5										A0AUN0;Q4G0C0;G3X928
	Q7TMW1;Q6ZPH4;Q8C2E3;Q91YS2;P46061;Q3ULJ9	P34022;H7BX22;Q3U6M5																P52875										O35598;E9PYF2										Q8R2Y8
	Q9D6F9	Q9D6F9																Q923C1;A2AJ15;Q8BTW7										Q3TRK3;Q9QXS6-3;Q9QXS6;Q9QXS6-2										Q9CQ56;Q5I940;Q05CJ0;Q9CQ56-2
	Q3TJN2	Q3UBA6;P63017;Q3U9L2;Q3TEK2;Q504P4;Q3TRH3;Q3TQ13;Q3ULM1;Q3TH56;Q3TZJ3;Q3KQJ4;Q3UDS0;Q3TH04;Q3TB63;Q3UXU1																A2A9Q2;Q8BHG1;Q8R320;A6PWC3;Q8CIJ0;Q8R1H1										Q91W34;D6RDS0;Q91W34-2										Q3ULL6;Q80UI8;Q149I6;Q9CS15
	Q61655	Q9Z0H8-2;Q9Z0H8;Q6A090																G3X8Y3;Q80UM3										Q4FE56;P70398										D3YUW7;E9QMC1
	Q91ZZ3	Q9DBE7;A2A5S3;Q3TWP5;Q641P2;Q3TJ07;Q3UTC8;Q3TU43;Q3TWA1;Q3UKX3;A2A5R8;Q3U8D3;Q9Z108;V9GX87;Q3U7A6;Q6TNG5																E9Q411;Q6GQV6;Q80XK8;Q6PGH6										Q8BLF1										Q3TDN2;Q3TDN2-2;D3Z2H4
	Q14AR0;Q9D8T7;F8WHU8;Q9D8T7-2	Q5SVF7;O55125;Q3UGS1;Q5SVG6																Q8BYA0										A2A9Q2;Q8BHG1;Q8R320;A6PWC3;Q8CIJ0;Q8R1H1										P28651
	Q9R1Q8;Q9D6K2	Q5DTL0;Q9EQG7;Q5FWJ8																Q9CQU3										A2AFS3										Q9DBH5
	P62075	Q8BJF9																Q3TFQ1;Q3UBW1										Q8BKE6;Q80Y48										A0A087WQS2;Q9CQC6;A0A087WPF9
	Q3TPU5;O70378;Q8C988;Q3TTC9;M0QWY0;M0QWP2	Q3TPU5;O70378;Q8C988;Q3TTC9;M0QWY0;M0QWP2																Q571B0;Q9ET30;Q8C6F5;Q3UH23										F6QKK2;Q8VEH3										F6QKK2;Q8VEH3
	Q3UW40;Q8BP67;Q8BT08;Q9CS31	Q7TMW1;Q6ZPH4;Q8C2E3;Q91YS2;P46061;Q3ULJ9																Q5DTJ4;Q7TSC1										O35852;Q3UZW2;O35417										Q3USZ8;Q3TS89
	Q9Z0H8-2;Q9Z0H8;Q6A090	Q14AR0;Q9D8T7;F8WHU8;Q9D8T7-2																Q3TDN2;Q3TDN2-2;D3Z2H4										F6TLV3;Q8BX90										Q6NXL1;Q80V21;Q8R0M3
	P34022;H7BX22;Q3U6M5	Q8K370;Q9CRH8																Q6NXL1;Q80V21;Q8R0M3										Q3U9U5;Q61335										Q5NCK8;Q9WTU6-3;Q9WTU6-4;Q9WTU6-2;Q9WTU6;Q8C094
	Q6P1B6;Q6NZN9;Q8BH69	E9Q1P8																Q9JL35										Q8VHE0;Q80YG4										Q8BLF1
	Q3V0T8;Q9WTN0;Q9CZZ6	Q8BGT7;Q3TGV3																Q921T2;Q921T2-3										Q8R1V4;Q5SVW9										Q9CZX0;Q9CZX0-2
	Q8BJF9	Q91ZZ3																D3YVW2;Q8BXA1										Q8C7V8-2;Q8C7V8;Q3V212										Q99PB4;Q9ER67;Q3TFU3;A2AG46;A2AG48
	Q922Q9-2;Q922Q9;D3YWG2;G8JL55;Q9CRU8	Q14AI7;O88544;D3YV99;F6QTS1;D3Z1R9																Q99JX4;A2A702										Q99KE1;Q3TSD4										Q5RL55;Q6P542
	Q3TIC8;Q9CZ13;Q3THM1;Q8K2S8	Q7TMN7																Q9Z1F9										Q6PDC2;Q9CZL0;Q3TFU8;Q99KF1;Q3U7N8;Q8BLM5										Q05D44
	Q8R4R6;A2ATJ2	Q3UW40;Q8BP67;Q8BT08;Q9CS31																Q6PDC2;Q9CZL0;Q3TFU8;Q99KF1;Q3U7N8;Q8BLM5										Q9CQU3										Q0PD38;P35293
	Q8K3H0	Q8CIN4																Q0VGU0;Q9CQC9;Q3U281										A0A077K846;Q3TZM9;Q3TZM9-2;Q3TZM9-3										A0A087WQQ5;A0A087WS29;A0A087WNW3;A0A087WQI3;F8VQC7;A0A087WQF8;A0A087WS04;A0A087WQG4;A0A087WS23;A0A087WQ25;A0A087WRS1;A0A087WP85;A0A087WP14;A0A087WPX0;A0A087WP48;A0A087WQD0;A0A087WPW5
	Q8BGT7;Q3TGV3	P09411;S4R2M7																Q14A47;Q8K003										Q9JME5										Q9JK38;Q3THZ8
	Q14C24;Q9D883;G3UW94	Q9CPQ3;Q3UBW3																B9EKP5;B7FAU9;Q8BTM8;B7FAV1;Q6KAM8										Q9ES64-3;H3BIZ2;H3BLC4;D6RIM8;Q6XA19;E9PYX1;E9QMN1;Q9ES64-2;Q9ES64										G3X922;D4AFX7;Q3UX52;Q3UQJ7;Q8CHD7
	Q8CIN4	Q3TJN2																S4R1L5;S4R2P8;O88738-3;O88738-2;O88738										B0QZX9;Q8BHC4										Q8VBZ3
	Q9DBE7;A2A5S3;Q3TWP5;Q641P2;Q3TJ07;Q3UTC8;Q3TU43;Q3TWA1;Q3UKX3;A2A5R8;Q3U8D3;Q9Z108;V9GX87;Q3U7A6;Q6TNG5	P62075																Q9D7J9;A2AR43										Q9D0I9;Q3TVC5;Q3UAZ3										Z4YJW0;A1L2Z3;Q8C7X2-2;Q8C7X2
	A2ALF0;A2ALF2;Q6NZB0;A2ALF3;F6TQL3	Q9R1Q8;Q9D6K2																Q8CGC7										Q9JHH9;Q9CTG7;F2Z4A2										Q8BML9;Q8BU21;Q3TN94;D3Z158;Q3TIN2;Q8R1V9
	Q9DB77	Q14C24;Q9D883;G3UW94																Q3TLI6										Q3UU20;Q8R1F6-2;Q8R1F6										E0CXW2;E9PUK2;Q80V03-2;Q80V03
	P09411;S4R2M7	P46471;Q3UIH5;Q8BVQ9;Q3U5V3																Q8CD95;Q3U3C3;E9QKQ5;Q80XT6;Q91ZP3-2;Q91ZP3;Q8CFH3										Q9CW79-2;Q9CW79										Q8C7F9;Q8C6H4;Q542E4;P58021;Q3TWB8
	Q9CPQ3;Q3UBW3	Q8R4R6;A2ATJ2																Q3UN48										Q9JIF7										Q9JI78
	Q7TMN7	Q4FK11;Q3UM20;Q3TF40;Q99K48;Q3TTV7;Q3TFC2																Q3V3R4;Q3V391;Q05DI0										Q9Z186										Q8BTY8;Q3UPD0;Q8BTY8-2;Q3UXF7;D3Z4T4
	G5E924;Q3UMT7	Q922Q9-2;Q922Q9;D3YWG2;G8JL55;Q9CRU8																E9QAH1;E9PVZ8;B2RWW2;Q571K1										Q8K268										Q9CQ80;A8XY17;A2A4J8;A2A4K0;Q9CQ80-2
	A6H663;Q9JLV1;Q3TAM9	A2ALF0;A2ALF2;Q6NZB0;A2ALF3;F6TQL3																Q6A0A9										Q3U8S0;Q9DCR2										Q3TFP8;Q3TXU8;Q3TH84;O55022
	P46471;Q3UIH5;Q8BVQ9;Q3U5V3	Q3V0T8;Q9WTN0;Q9CZZ6																E0CZE0;Q3UK27;Q8VBW6;Q3TS59										Q9EPC1;Q3UF75;Q8C5R4										E9Q2B2;Q5PRE9;Q5RIM6;Q60974-2;Q60974;F7C134;Q8VDE8;E9Q9Y2;Q8CHB6
	Q8R1Q3	Q3TIC8;Q9CZ13;Q3THM1;Q8K2S8																Q99JI4;Q8C1T2										Q497Z4;Q8BWR8										P47856-2;P47856
	Q8BMF4	Q8K3H0																Q548W7;P31786;M0QWU8										Q3UYM1;P54729;A0PJ90;A0JLP6										Q9D8V7;Q8BM48
	Q4FK11;Q3UM20;Q3TF40;Q99K48;Q3TTV7;Q3TFC2	A6H663;Q9JLV1;Q3TAM9																P09055;P09055-2										Q3UB66;Q0PD67;P62821										Q9CQ28;Q9CQ28-3;Q9CQ28-2
	Q80UJ8;B2RWI2;Q9EP89	Q8R1Q3																Q91YR7;Q91YR7-2										Q922Q8;Q3TF84										Q3UYM1;P54729;A0PJ90;A0JLP6
	E9QLB8;Q566J8	Q8QZZ7;G3X9K8																Q9D964										Q921M8;Q3TEX8;P35123;Q6NXV6;Q5DTK8;Q3TPN5										Q7TQD5;Q3UGT1;P97742;A8ASF5
	Q544R9;G5E920;O54879;A2AP78	Q8C298;E9Q179;Q8C5Q4																Q80X80;Q8CAA2;Q3U590;Q9DBJ2;Q6PHC0;Q80U48;Q8CFV7										H3BJU7;H3BJX8;H3BJ45;H3BJ40;H3BKH9;Q60875-5;Q60875-4;Q60875;Q3TYZ4;Q60875-2;Q60875-3										Q6DFW4
	P61965;Q3UNQ3;F6Q3W0	Q3U9V4;P62880;E9QKR0;D3YZX3;D3Z1M1;D3Z1T4																A2AE27;Q9DBT5										Q6PD19;Q6PD19-2										P84084
	Q3U9V4;P62880;E9QKR0;D3YZX3;D3Z1M1;D3Z1T4	Q544R9;G5E920;O54879;A2AP78																B9EIX2;Q80U49										Q8BML9;Q8BU21;Q3TN94;D3Z158;Q3TIN2;Q8R1V9										Q3TK92;Q9Z1K6
	Q8BM84;P70372;Q8BVF8;Q8BTQ1;Q3UFF9	Q9DB77																Q9D1H7;D3Z4J5;Q9D1H7-2										Q9CQ80;A8XY17;A2A4J8;A2A4K0;Q9CQ80-2										B2RQC6;E9QAI5;G3UWN2;B2RQC6-2;Q6P9L1
	Q3TVP0;P17095-1	G5E924;Q3UMT7																Q8BU33;Q8BU33-3;Q8BU33-2										Q8R1H0										E9QAH1;E9PVZ8;B2RWW2;Q571K1
	Q52KG9;Q3TIX8;Q3TI05;P80317;Q3TW97;Q3TI62;E9QPA6;Q8VEI1	Q3TVP0;P17095-1																Q60803;Q3UHM2;Q3UHJ1										Q8C3X8										Z4YJT3;Q6ZQ58
	Q542X7;P80314;Q9JJD8	E9QLB8;Q566J8																Q80U72;Q80U72-4;Q80U72-2;Q80U72-3;F6RIN9										Q7TMC8;Q8C7W3;Q7TSB1;Q8CI18;Q6KAP2										Q3B7Z2;Q3B7Z2-2
	Q80Y09	P61965;Q3UNQ3;F6Q3W0																Q8R010;Q8R3V2										P84084										B9EKP5;B7FAU9;Q8BTM8;B7FAV1;Q6KAM8
	Q545L9;F7D432;E9PWE0;E0CYV0;P23506;P23506-2;Q8BPI6;F6V9F1	Q8BM84;P70372;Q8BVF8;Q8BTQ1;Q3UFF9																Q3UA32;Q6PB93;Q3UM52;Q6PB93-2										Q6NV83-2;Q6NV83										Q5EBQ6;P51410;Q5M9J5;D3Z629
	Q8BQ47;D3Z0T5	Q80YU9;A2AN96;O88851																G3UXA6;G8JL74;Q8BHD7-2;G3UZ01										B9EKQ1;A3KGB4										B2RSU7;E9PWI6;Q8CHG3;E0CYI9
	Q80VD1	Q542X7;P80314;Q9JJD8																Q99LX5										Q3TGM7;Q69ZS7;Q3UJ02;Q69ZS7-2										O89079;D3Z315;F6YFR7
	P16546	P68369																Q3U9U5;Q61335										Q0PD38;P35293										Q8VDN4;D3YUR9
	Q8QZZ7;G3X9K8	Q9Z2I8;C6EQH3;Q9Z2I8-2																Q9CTE8;Q9DB25										Q8R1G2										Q80ZP8;Q3TMX5;A8C1V1;Q9CXI5;F6USD5;F6T4L3;E0CXA8
	Q9Z2I8;C6EQH3;Q9Z2I8-2	Q810A7;Q810A7-2																Q0VDL6;Q04899;Q0VDL5										Q3UUH0;Q91YI0;E0CXM2;E0CY49										Q62277;A4FUR8
	Q922D8;Q3TW74;Q3UZH3;Q8BXX7	Q8BQ47;D3Z0T5																Q544Q7;P97370;Q3UFH4;Q1WWL1										Q8BXR1;D3YY38										Q99JW5
	Q810A7;Q810A7-2	Q545L9;F7D432;E9PWE0;E0CYV0;P23506;P23506-2;Q8BPI6;F6V9F1																Q0PD50;Q3UHW5;P55258										I7HPY1;I7HLV5;Q9D8T0;I7HJS7;J3JS95										P08003
	E0CXZ1;J3QM95;F8WGT4;Q8BYN5-2;Q8BYN5	Q9D0L8;Q9D0L8-2;Q9D0L8-3;D3YYS7;D3Z478																Q6GTX3;Q4FK40;Q3UBS0;Q3TXU4;P08226;Q3TX45;Q3UEE7;G3UWN5										F8WIA4;Q8VCZ6										Q9D958
	Q8C298;E9Q179;Q8C5Q4	Q8BMF4																B7ZNH7;K3W4R4;Q80X19-2;Q80X19										Q3UMR5;Q3UMR5-2										Q5SUH7;Q3UPG6;Q99KN9;Q3UGL3
	O88428;Q9QYS0	Q99KQ9;Q9ES93;Q9R013;A4FUP7																Z4YJT3;Q6ZQ58										Q80Y14										D3Z2E9;D3Z7G3;D3YYX8;Q9D882
	Q3TST0;Q8K1R3;Q3UNL5;Q3TN29;Q8K1R3-2	Q80UJ8;B2RWI2;Q9EP89																Q3U944;Q9D0F3										Q8CC06;Q6PEE8;Q80ZI8;Q61739-2;Q61739;Q3TWK2;Q8BR82;F6VSK8										Q9EPE9;Q69Z96
	Q8BGT8;F7D3N3;Q8BGT8-2;F6U6Z2	E0CXZ1;J3QM95;F8WGT4;Q8BYN5-2;Q8BYN5																P48193;A2A841;P48193-2;A2A842;A2AD32;B6ZHC8										Q9CZX0;Q9CZX0-2										Q8CE96;Q8CE96-3
	Q9JIA1	Q80Y09																Q540I4;Q3TJS0;O08917;G3UYU4										Q9Z1Z0;Q9Z1Z0-2;Q9Z1Z0-4										Q8C5F9;A9CLV6;Q9QZI8
	P50396	O88428;Q9QYS0																Q9EPE9;Q69Z96										Q9D8C2										Q8BXJ6;Q8BGV0;D3YV21
	Q99KQ9;Q9ES93;Q9R013;A4FUP7	Q80VD1																F8WGX5;Q6PNC0										Q14AC7;P61211;Q9D7H9;Q3TIR2;F8WIB1;Q4V9U3										Q8BM55;D3Z6S1;Q8BM55-3;Q8BM55-2
	P68369	Q52KG9;Q3TIX8;Q3TI05;P80317;Q3TW97;Q3TI62;E9QPA6;Q8VEI1																Q3TDQ1										Q99KW9										E9Q411;Q6GQV6;Q80XK8;Q6PGH6
	P52480	P16546																Q8BY87-2;Q8BY87										Q0VGU0;Q9CQC9;Q3U281										E9PZ87;Q8BJG6
	Q80YU9;A2AN96;O88851	P17751;H7BXC3																P47811;B2KF35;Q5U421;P47811-2;P47811-3;B2KF34										D3YVW2;Q8BXA1										O54692
	Q9D0L8;Q9D0L8-2;Q9D0L8-3;D3YYS7;D3Z478	Q6ZWM4																Q9D8V7;Q8BM48										Q8VCH8;Q3UFS2;Q05C23										P11679
	Q99M46;P97760;Q9DB22;Q3UUX3	B3V097;Q8BIQ5;Q8BIQ5-2;A2AEK1;B3V099																Q9CQ56;Q5I940;Q05CJ0;Q9CQ56-2										Q52L50;Q99JI6										Q9ESP1
	Q564F4;Q3TII0;P80315;Q3UJZ8;G5E839	Q3TT94;Q6P1F6;Q571J7;Q3TPC5;Q9CWU3																Q3U8F5;Q9D8W5;B1AT36;Q3TRH2										Q8BXL7;E9PZK7										Q3UD03;Q3U199;Q3TCV9;Q6NSR8
	O08749;Q3TIE8	Q922D8;Q3TW74;Q3UZH3;Q8BXX7																B7ZWL1;B2RXR3;Q6ZQ08-2;Q6ZQ08;Q6ZQ08-4										Q8C0L8										Q3TDM8;E9Q855;Q3UK26;Q3UXS0;O35609;B2M0S2
	Q9CSU0-2;Q9CSU0;Q9CSU0-3;F6YB25	Q1HL32;Q9CW03;Q6P5E5;Q6PIE1;Q6PFZ4;Q3UNU2																Q3UG16;P35585										G3X922;D4AFX7;Q3UX52;Q3UQJ7;Q8CHD7										Q99JZ4;Q3TXJ4;P36536
	Q1HL32;Q9CW03;Q6P5E5;Q6PIE1;Q6PFZ4;Q3UNU2	P50396																Q9D1Q4										Q548W7;P31786;M0QWU8										Q80WW9
	D3Z3A0;Q9DCL8;Q8BVM6;Q9CT86	P52480																E9QQ10										Q8BH24;Q14B57										Q3U9U5;Q61335
	G3XA13;Q99NH2;B2RUK1;B7ZNY3;F6S7Z1;A5D6P2;Q99NH2-2;E0CXR8;E0CZE2;E0CZ83;E0CXL4;Q99NH2-4;Q8BPQ6;Q8BPQ4;E9PYJ2;F6TSJ9;Q99NH2-3;E0CX45;E0CY24;Q99NH2-5;F6UGU7	Q9JIA1																Q810U3;E9Q171;A0A087WR56;E9PW06;Q6ZQ54;A0A087WPX3;A0A087WNW2										Q8R010;Q8R3V2										Q8BXL7;E9PZK7
	Q6ZWM4	Q8BGT8;F7D3N3;Q8BGT8-2;F6U6Z2																Q9D1M4										Q922Q1;F6UB20										Q3UKQ5;Q3UF03;P24668
	B3V097;Q8BIQ5;Q8BIQ5-2;A2AEK1;B3V099	Q99M46;P97760;Q9DB22;Q3UUX3																Q9BCZ4										Q5I012-3;J3QNE8;Q5I012;Q99JV6;Q7TMR2										A2RRJ4;Q924C1
	Q3TT94;Q6P1F6;Q571J7;Q3TPC5;Q9CWU3	Q8VE22;F7ARZ1;Q3TI14;Q3THH3;Q99LZ4;Q5SXC9;A7M7Q8																G5E8V9;E9Q3G5										B1AZI6;Q3US09										Q99KV1
	B2RUK5;Q3ULD5;Q6PD20	Q3TST0;Q8K1R3;Q3UNL5;Q3TN29;Q8K1R3-2																Q6NV83-2;Q6NV83										Q99KR7										Q9Z186
	Q3U2G2;Q571M2;Q61316	Q3U2G2;Q571M2;Q61316																P27612										O89001										Q6ZPS0
	Q80X54;Q91YJ2	Q91V47;Q3UK94;Q684Q9;P21126;B2M0S0;B2M0R9																Q9Z2I0										Q9QXK3-4;Q9QXK3;Q9QXK3-3										Q540I4;Q3TJS0;O08917;G3UYU4
	P17751;H7BXC3	O08749;Q3TIE8																Q9DBZ6;Q3U645;P55096;Q3UNS0										A2AE27;Q9DBT5										Q3UMT1
	Q91V47;Q3UK94;Q684Q9;P21126;B2M0S0;B2M0R9	Q80X54;Q91YJ2																E9Q8L9;Q9D620										A3KMJ8;P61759;Q3TIR6										Q9EPC1;Q3UF75;Q8C5R4
	Q99KF5;P00493	D3Z3A0;Q9DCL8;Q8BVM6;Q9CT86																Q3U6E4;Q0VGU2;P26350;Q8C2T3;Q3U8X6;Q3UA54;Q8CAQ5										Q5SUC3;P35564;Q3TXE5										Q3UDR8
	Q4FZG2;Q545P3;P46656;Q3UG56	Q9CSU0-2;Q9CSU0;Q9CSU0-3;F6YB25																Q790I0;Q9Z1Q9;Q7TPT7;Q3U3D3;G3UY93;Q3TII4										P27046										E9PVC5;Q6PD42
	Q71LX8;P11499	Q4FZG2;Q545P3;P46656;Q3UG56																Q99M51;Q8BH99;Q8BMV0;Q8BZ27;A0A087WSB1										Q9DBH5										Q3UE92;Q3UKF5;S4R1I3;Q6P1B1;Q3TL27;Q8VDK8;Q8BKH1
	Q5SW18;P63005;Q3UH92;Q3UGR6;Q3TJG1;Q3UHM0;P63005-2;Q3TIK0	Q564F4;Q3TII0;P80315;Q3UJZ8;G5E839																Q99LL5;E9QAL6;Q9CTC0;Q9CSK2;Q8BW04										B9EJ97;A2AG68;Q64430										Q5SUC3;P35564;Q3TXE5
	Q5EBG8	Q5EBG8																E9Q035;P47758;Q542X6										Q91XE8										Q9EPJ9;Q3TGS9;Q05DE0;V9GXM1;Q9EPJ9-2;V9GWV1;Q6PB94;Q05BC5
	A2APY7;A2APY7-2	Q99KP6;Q99KP6-2;Q4ADG5;Q99KP6-3																Q3UGY8										Q9CQK7										Q9CYN2
	P70670;Q60817;Q3UK68	G3XA13;Q99NH2;B2RUK1;B7ZNY3;F6S7Z1;A5D6P2;Q99NH2-2;E0CXR8;E0CZE2;E0CZ83;E0CXL4;Q99NH2-4;Q8BPQ6;Q8BPQ4;E9PYJ2;F6TSJ9;Q99NH2-3;E0CX45;E0CY24;Q99NH2-5;F6UGU7																B2RXR6;E9QNQ2;J3QK13										Q9JI90;G3XA54										Q8BP47
	O54988	O54988																Q2KN98;Q6GQV8;Q8CI53;Q8C9Q9										Q3TQZ7;Q80W82;Q80W81;Q78GB8;Q8C9D4;Q80W80;E9QN59;Q61831-2;Q61831;Q544A0;A6P3E4;Q7TSJ7;G3X8U9;Q91Y86										Q3U2W2;Q7TPV4;Q3TLF6
	Q3TVS6;P10605;Q3TC17;Q6LAF6	O88291;D3YXQ7																Q8C7F9;Q8C6H4;Q542E4;P58021;Q3TWB8										D3Z2E9;D3Z7G3;D3YYX8;Q9D882										A5A8K4;D3Z118;P97411;P97411-2;S4R217;D3Z376;D3Z119
	Q8VE22;F7ARZ1;Q3TI14;Q3THH3;Q99LZ4;Q5SXC9;A7M7Q8	A2RRK3;O54988-2																Q8BZS9-2										P52479;P52479-2										Q548W7;P31786;M0QWU8
	A7VMV2;Q99KP3	Q99KF5;P00493																Q91VR8										Q8R3I3										G5E8R1;G5E8R0;E9Q455
	Q7TNV0;Q3U4W4;E9Q8Y1;D3YVJ6;Q9CVL7	Q71LX8;P11499																Q9JIF7										E9PWG2;Q8BJI6;E9PY51;Q69ZT3										Q3THK3;Q8BVJ2
	A2RRK3;O54988-2	Q5SW18;P63005;Q3UH92;Q3UGR6;Q3TJG1;Q3UHM0;P63005-2;Q3TIK0																Q8VCT3;E9PYF1;Q8BMH2										O35153;I6L979										Q3U506;Q3TLJ5;Q99LM2;Q3TSS9
	Q99KP6;Q99KP6-2;Q4ADG5;Q99KP6-3	A0A087WRE5;Q6P3D0																A2AF58;Q80T23;Q80T23-2										Q3TFQ1;Q3UBW1										Q8CCP0;Q8CCP0-2;Q8CCP0-3
	Q64374	Q64374																H9KV00;Q9QX47-3;Q9QX47;H9KV15;H9KV01;Q9QX47-4;Q9QX47-2										Q545I9;P14069										Q8BFU3;Q8BFU3-4;Q8BFU3-3;Q8BQY0;Q8C8I5;Q8BFU3-5;Q8BFU3-2
	A0A087WRE5;Q6P3D0	Q9ERT9																Q3TK92;Q9Z1K6										Q3UDR8										Q6P2L7;E9PZJ6;Q6P2L7-2;Q6P2L7-3;A2AR60
	Q9D2U9;Q8CGP0	B2RUK5;Q3ULD5;Q6PD20																Q5RL55;Q6P542										Q0P5W2;Q8C0L0;A2ARI0										Q8CD95;Q3U3C3;E9QKQ5;Q80XT6;Q91ZP3-2;Q91ZP3;Q8CFH3
	Q3TF14;P50247;Q3U4D1;Q5M9P0;Q3U5U5;Q8BPI7	A3KMF2;Q5DTZ3;G3X8R8;P59759																E9QB02;Q68FL6										Q99K01-2										J3KMG3
	Q9ERT9	Q9D2U9;Q8CGP0																P47856-2;P47856										P11352										Q9JKK7;Q9JKK7-2
	A3KMF2;Q5DTZ3;G3X8R8;P59759	Q7TNV0;Q3U4W4;E9Q8Y1;D3YVJ6;Q9CVL7																Q8K2L8;Q3UGE1;Q8C0C3										Q8BLV3;Q8BLV3-2										Q3TW51;Q78PY7;Q3UZI3;Q3TRW3
	O88291;D3YXQ7	Q3TF14;P50247;Q3U4D1;Q5M9P0;Q3U5U5;Q8BPI7																Q9DBU8;Q9JKC8;H7BWY2										E9PZJ8										Q3UQ26;A2AI52;Q80U87;Q3UZ62;Q58E42
	Q3THQ5;Q60864	A2APY7;A2APY7-2																Q4PJX1;Q4PJX1-3;Q4PJX1-2										D3YWH4;D3Z6X7;Q9DBU0;D6RGM8;D3Z279										Q8CB77
	Q9ERD7;Q9CRT0	Q3TVS6;P10605;Q3TC17;Q6LAF6																Q9Z1Z0;Q9Z1Z0-2;Q9Z1Z0-4										P70699										F6TLV3;Q8BX90
	Q9DC36;Q8CDE0;Q5SS83;Q3UEG9;Q60634-3;Q60634-2;Q60634	A7VMV2;Q99KP3																Q9JI78										B9EIC7;Q8K0S0										Q9Z1Z0;Q9Z1Z0-2;Q9Z1Z0-4
	P62311	P70670;Q60817;Q3UK68																Q3UDP8;Q9JJZ4;F6SPK0;Q3TV38;B1AWT7										Q6P2L7;E9PZJ6;Q6P2L7-2;Q6P2L7-3;A2AR60										Q9JI90;G3XA54
	P57722;P57722-2;E9Q7D8;Q8CFQ6	Q3THQ5;Q60864																Q544H0;Q9Z1D1;Q3THA0										Q3UKQ5;Q3UF03;P24668										Q58E29;Q0VEW4;Q9R1Q7
	Q03517	Q9DC36;Q8CDE0;Q5SS83;Q3UEG9;Q60634-3;Q60634-2;Q60634																A0A087WQQ5;A0A087WS29;A0A087WNW3;A0A087WQI3;F8VQC7;A0A087WQF8;A0A087WS04;A0A087WQG4;A0A087WS23;A0A087WQ25;A0A087WRS1;A0A087WP85;A0A087WP14;A0A087WPX0;A0A087WP48;A0A087WQD0;A0A087WPW5																				Q9D7E4
	Q1HFZ0;H3BKN0;Q1HFZ0-2	Q1HFZ0;H3BKN0;Q1HFZ0-2																P68510																				E9QQ10
	Q3UIG8;Q9JIF0-2;Q8C2D7;Q3TPF5;Q80WB1;Q80WV6;Q9JIF0-3;Q9JIF0;D3Z0A2;F8WH01;D3Z3N0;Q9CX58	Q60973;A2AFI9;A2AFJ1;Q3UJI2;Q3UX53;Q8C5H3																B1ARU4;E9PVY8;E9QA63;Q9QXZ0;E9QNP1;Q9QXZ0-3;Q9QXZ0-2;Q9QXZ0-4;F6Q750																				Q8VHE0;Q80YG4
	E9QB01;P13595-2;E9Q589;P13595-3;P13595-4	Q3UIG8;Q9JIF0-2;Q8C2D7;Q3TPF5;Q80WB1;Q80WV6;Q9JIF0-3;Q9JIF0;D3Z0A2;F8WH01;D3Z3N0;Q9CX58																Q0PD49;P61028;Q8BKQ0																				Q8BJT9;Q8BJR2;Q91VV3;Q8BK85
	B2RRH9;Q3THK7	Q3SXD3																Q9QZE5																				Q9JLJ1
	Q9DC07	E9QB01;P13595-2;E9Q589;P13595-3;P13595-4																B2RUA5;Q7TSI3																				Q922Q8;Q3TF84
	Q60973;A2AFI9;A2AFJ1;Q3UJI2;Q3UX53;Q8C5H3	Q9ERD7;Q9CRT0																Q80UI9;Q3TDI2;P56695;Q3UN10																				F8VPU2;Q8K2R0
	Q3SXD3	Q03517																Q6ZPS0																				H3BKT0;H3BJN3;Q6AXG1;Q9JJB6;H3BJ26;H3BLJ7
	Q9CQU1	B2RRH9;Q3THK7																Q14CH7																				Q3UD58;Q6PAM1;Q3UXT5;Q6PAM1-2
	O88952;Q3TTY6;Q3TS99	P62311																Q5U4C1;Q6PD32;Q5U4C1-2																				P70699
	Q1WIL9;E9PYN1;Q8R5M8-4;Q8R5M8-3;Q8R5M8-2;Q8R5M8;Q8R5M8-7;Q8R5M8-6;E0CY16;Q8R5M8-5;Q9QYL3;Q9QYL4	Q1WIL9;E9PYN1;Q8R5M8-4;Q8R5M8-3;Q8R5M8-2;Q8R5M8;Q8R5M8-7;Q8R5M8-6;E0CY16;Q8R5M8-5;Q9QYL3;Q9QYL4																Q9CW79-2;Q9CW79																				E9PVD1
	Q9WV98	Q9CQU1																P63154																				Q3UZJ4;Q61151
	P11983;P11983-2	Q9DC07																A0A087WQS2;Q9CQC6;A0A087WPF9																				P61961;H7BWZ1;D3YW97
	P57774	P57722;P57722-2;E9Q7D8;Q8CFQ6																Q3UXM3;Q9QYH6;Q3UIL5;Q91W72;Q571N9																				Q9JIF7
	P21619	O88952;Q3TTY6;Q3TS99																Q3UG80;Q8R307;Q69ZI9;Q8CFS5;Q8BLK7;Q3U7D9																				Q3UIP1;A2AER4;Q9R0M8
	P97930;Q6GRA7;P97930-2	Q9WV98																E9PVC5;Q6PD42																				Q9CTE8;Q9DB25
	P30416;F6S2D5;D6RDE2	P21619																Q5EBQ6;P51410;Q5M9J5;D3Z629																				A2AVJ7;Q99PL5
	Q3U741;Q501J6;Q3TU25;Q501J6-2	P11983;P11983-2																B9EIV8;Q9WVL3-2;Q9WVL3																				Q91VW5
	Q99LB6	P97930;Q6GRA7;P97930-2																Q8VHK9;A0JLR3																				Q4PJX1;Q4PJX1-3;Q4PJX1-2
	Q99JF8;A2BI12;Q99JF8-2;Q05CD2	Q3U741;Q501J6;Q3TU25;Q501J6-2																Q8K0F1																				Q3UPH1
	Q9QZX7-2;Q9QZX7	Q99LB6																Q9ERU9																				Q14C53;A0A068BIT0;Q31125
	Q3UKV4;D3Z5N6;Q61103;F8WIP7	P57774																G3UZ60;G3UWI9;G3UWX9;Q9Z172;G3UZA7;Q9Z172-2																				Q545I9;P14069
	Q3U0V1	Q99JF8;A2BI12;Q99JF8-2;Q05CD2																Q5DTH1;E9QKT1;Q8CE29																				Q0VDL6;Q04899;Q0VDL5
	Q9JJV2-3;Q9JJV2;D3YWS3;Q9JJV2-2	P30416;F6S2D5;D6RDE2																Q99KK2;Q99KK2-2																				Q8CC06;Q6PEE8;Q80ZI8;Q61739-2;Q61739;Q3TWK2;Q8BR82;F6VSK8
	Q8R326-2;Q8R326	Q3UKV4;D3Z5N6;Q61103;F8WIP7																P11679																				A2AF58;Q80T23;Q80T23-2
	A7YY80;D0VYV7;B6ZHD1;V6BQR3;Q8BGK4	Q3U0V1																Q3UZJ4;Q61151																				Q9QXW9
	Q9JKF6	Q9QZX7-2;Q9QZX7																Q8C1D0;Q6ZWQ7																				E9QKT0;Q63943-2;Q921S6;Q63943;Q3URR2;E9Q5E0
	Q3UID0;Q6PDG5-2;Q6PDG5	Q9JJV2-3;Q9JJV2;D3YWS3;Q9JJV2-2																F8WIE5;Q69ZR2																				Q9CQK7
	P48722;P48722-2;E0CY23	P24529;Q3UTB3;E9Q9G5																O54692																				Q8BMP6;Q6P9T6;Q3TJW1
	P24529;Q3UTB3;E9Q9G5	A7YY80;D0VYV7;B6ZHD1;V6BQR3;Q8BGK4																Q3UXD9;Q99MZ7																				Q3TM85;Q3U3W2;B2RVR2;Q80TD8
	Q6NXZ0;Q3UDD5	Q3UID0;Q6PDG5-2;Q6PDG5																Q9QXW9																				Q9D394-2
	P36552;Q3U029	P48722;P48722-2;E0CY23																Q9ES28-4;Q9ES28-2;Q9ES28-7;Q9ES28;Q9ES28-3;Q9ES28-6;Q9ES28-5																				E9PZJ8
	Q9Z2X1;Q9Z2X1-2;J3QM80;J3QMT0	Q6NXZ0;Q3UDD5																Q8R1V4;Q5SVW9																				P37804
	Q99J57;Q3THS6;Q3TSS0;Q3UZA2;Q3TED1;Q3UAP7;Q6PE05	Q8R326-2;Q8R326																Q3U506;Q3TLJ5;Q99LM2;Q3TSS9																				B0QZX9;Q8BHC4
	P31324	Q9Z2X1;Q9Z2X1-2;J3QM80;J3QMT0																Q5FWB6;E9Q070;D3YVM5																				B9EKQ1;A3KGB4
	Q3U4U6;P80318;E9Q133;Q3U0I3;F6Q609	Q9JKF6																Q8VDC1																				Q8BI84;Q8BI84-2
	Q99NF7;Q5BKS2	Q99J57;Q3THS6;Q3TSS0;Q3UZA2;Q3TED1;Q3UAP7;Q6PE05																Q9JLI8																				B7ZMR0;Q76LS9-2;Q76LS9
	B9EHZ5;Q9JLB0-2;Q3UN60;Q9JLB0;Q6NSS8;Q811G2	P36552;Q3U029																Q545H7;P97352																				Q4V9Z5-3;Q4V9Z5-2;Q4V9Z5
	Q3V275;Q99N23	P31324																Q8VCQ8;E9QA16;E9Q0M9;D3Z6I7;E9QA15;S4R1T7;Q3UGC3																				I6L960;G3X9Y5;Q6A0C5;E9Q735
	Q64737;Q3UJP8;Q3TH49;Q64737-2	Q3U4U6;P80318;E9Q133;Q3U0I3;F6Q609																Q6NVE8																				A0A067XG53;B9EJ23;B7ZP42;O70589-3;O70589-4;O70589-5;O70589;O70589-2
		B9EHZ5;Q9JLB0-2;Q3UN60;Q9JLB0;Q6NSS8;Q811G2																P23116;Q6A0B9;Q3UL99;Q3UM46;Q3TKF9;Q3UEK3																				D3Z7V3;H7BX64;Q3URD3-2;Q3URD3;F8WIH0;F6UV57;F6YCM8;Q3URD3-5
		Q99NF7;Q5BKS2																O08807																				F6UIS1;Q9CQE7;Q9CQE7-2;F6RK81
		Q3V275;Q99N23																Q9JI90;G3XA54																				Q8VCQ8;E9QA16;E9Q0M9;D3Z6I7;E9QA15;S4R1T7;Q3UGC3
		Q64737;Q3UJP8;Q3TH49;Q64737-2																Q9D375;Q8R2Y0-2;Q8R2Y0																				Q9CW79-2;Q9CW79
																		P83741-4;P83741-5;P83741;P83741-2;P83741-3;Q6SLK2;P83741-6																				P63254;Q8C2N7;Q6P3B4
																		Q91XI1																				Q6A028
																		E9Q3Y4;Q9ESE1;Q9ESE1-2;Q9ESE1-3																				Q4FJX4;P97315
																		Q6PGC1																				O70423;O70423-2;A2A4I8
																		Q8R1B4;Q66JU1																				Q3TQZ7;Q80W82;Q80W81;Q78GB8;Q8C9D4;Q80W80;E9QN59;Q61831-2;Q61831;Q544A0;A6P3E4;Q7TSJ7;G3X8U9;Q91Y86
																		Q8C4N0;Q91WR9;Q3TMN9;Q9JJK5;Q6A0E4																				Q8C4N0;Q91WR9;Q3TMN9;Q9JJK5;Q6A0E4
																		Q3TM85;Q3U3W2;B2RVR2;Q80TD8																				Q99KK2;Q99KK2-2
																		Q8VBT0																				Q3TRK3;Q9QXS6-3;Q9QXS6;Q9QXS6-2
																		Q6R891																				Q9D1M4
																		Q14C53;A0A068BIT0;Q31125																				A2AE27;Q9DBT5
																		P70336;P70336-2																				P56375
																		Z4YJR1;Q3U3R4-2;Q3U3R4;Q3U3R4-3																				A2AQ53;O88840;Q61554;Q60784
																		Q6WVG3;Q69ZA6																				Q3UFV9;Q91YW3;Q3UKA1
																		Q9Z2P7;Q91XH6;O88384;Q3TUP8																				Q8R1V4;Q5SVW9
																		Q8C0Y0;Q8C0Y0-3;Q8C0Y0-2																				Q4FK14;Q3UQ93;Q3ULV0;Q3UAT2;Q91V04;Q9CVJ6
																		Q8K273																				Q9JIK5;Q6PCP0;Q3ULC7;Q9CWZ5;Q8K2L4
																		E9PV41;Q5DTQ4;E9PXV7;O08808;Q6NS79;D3Z074																				Q6PDC2;Q9CZL0;Q3TFU8;Q99KF1;Q3U7N8;Q8BLM5
																		Q3U0D7;P62331																				Q9D8C2
																		Q8C0E2																				Q4FJY3;Q62313
																		Q7TSZ3;Q8BMJ2																				E9Q512;H3BJG4
																		Q7M759																				Q8R010;Q8R3V2
																		Q8CHW4																				Q0VGU0;Q9CQC9;Q3U281
																		Q8R550-3;Q3TA88;Q8R550-2;Q8R550;Q3TSX2;E9Q0C1;Q8R550-5;Q8R550-4;Q8R550-6																				Q6PGC1
																		Q9CXW4;E9PYL9;Q8VC94;A2BH06																				B9EIC7;Q8K0S0
																		Q3UH60;D3Z5G8;Q3UH60-2																				Q99KE1;Q3TSD4
																		Q3TDD9																				Q60803;Q3UHM2;Q3UHJ1
																		Q8BWV2;G3X8X7;Q920Q4;Q920Q4-2;Q8C016																				D3Z2U7;F6U9F5;F6Q346;F6W4F5;E9PWV9;D3Z7M6;F6QKL8;P27699-10;P27699-2;P27699-8;P27699-7;P27699-6;P27699-5;D3Z7P7;D3Z326;Q78Z98;F6VJ22;D3Z6A5;F6QWT6;P27699-11
																		G5E896;Q3UJB9;D6RE33;Q3UJB9-2																				Q2KN98;Q6GQV8;Q8CI53;Q8C9Q9
																		Q8BVE3																				D3YWH4;D3Z6X7;Q9DBU0;D6RGM8;D3Z279
																		Q9CYN2																				P52875
																		Q8VHE0;Q80YG4																				Z4YJR1;Q3U3R4-2;Q3U3R4;Q3U3R4-3
																		Q6ZPJ3																				D3YVW2;Q8BXA1
																		Q99KE1;Q3TSD4																				Q8VCH8;Q3UFS2;Q05C23
																		D3Z7V3;H7BX64;Q3URD3-2;Q3URD3;F8WIH0;F6UV57;F6YCM8;Q3URD3-5																				Q9R0A0;Q9QX52
																		Q06180-2;Q06180;D3Z6W2																				Q9CPY7-2;Q9CPY7
																		Q80WW9																				Q9D1M7
																		Q9R0A0;Q9QX52																				Q922Q1;F6UB20
																		A2AL50;Q8C0I1;H3BKN2;A2AL49																				Q8R3I3
																		Q99PT1																				Q3UW53;E9PYV4;Q3TDH5
																		Q58E29;Q0VEW4;Q9R1Q7																				Q3UIA4;Q9JHW9
																		A2AVJ7;Q99PL5																				Q9JHH9;Q9CTG7;F2Z4A2
																		D3Z030;Q6EDY6-3;Q6EDY6;F7AI27																				Q0PD50;Q3UHW5;P55258
																		Q9D958																				Q3UN48
																		F6TLV3;Q8BX90																				E9Q8T1
																		E9Q2B2;Q5PRE9;Q5RIM6;Q60974-2;Q60974;F7C134;Q8VDE8;E9Q9Y2;Q8CHB6																				Q14CH7
																		Q8BM55;D3Z6S1;Q8BM55-3;Q8BM55-2
																		Q3TJZ6;Q8BL36
																		E9Q9M5;J3KMM1;Q3UJD6-2;Q3UJD6
																		Q8BHS6
																		E9QKT0;Q63943-2;Q921S6;Q63943;Q3URR2;E9Q5E0
																		Q5RKN9;Q3UAS2;Q3UJV2
																		E9PVD1
																		Q4FK14;Q3UQ93;Q3ULV0;Q3UAT2;Q91V04;Q9CVJ6
																		Q8C5F9;A9CLV6;Q9QZI8
																		Q3USZ8;Q3TS89
																		Q3TSU7;B2RTN5;Q91YM2
																		Q9JKE5;Q03141-2;Q03141-3;Q03141;Q5DTG3
																		Z4YKC4;Q80XI3-2;Q80XI3-4;A2AMI2;Q80XI3;Q80XI3-3;A2AMI7;Q6DI78
																		Q8BGW6-2;Q8BGW6
																		Q8BHN3
																		Q6IRU2
																		Q9D8Z1
																		Q8CBP1;Q8C762;Q3TJI7;Q04736;D3YZ57;P39688-2;P39688
																		P35283;A2CG35
																		E9QAQ7;A2BH40-3;A2BH40;A2BH40-4;A2BH40-2
																		Q3TKP3;P28658;Q8BWX1
																		Q3B7Z2;Q3B7Z2-2
																		Q8VDD5;Q3UFT0
																		Q3UKM9;Q3U3A7;E9Q794;A4FTZ3;Q6ZPV1;Q3UII8;Q924K8-2;Q924K8;Q3TY62;H3BLE1
																		O35566
																		E9Q3B9;D3YYS6;O35678;Q3UFX6;Q3UFN1
																		Q8CD26;A4FUQ6
																		Q8C129;Q3TTA8;Q8BZ14
																		Q8C419
																		Q0VGB7;A4QMV1
																		Q80WJ7;F6QHD1;F6ZSG0
																		Q3TJD0;P61620
																		Q8VBZ3
																		Q3U706;Q91XC8;A0A087WR57
																		Q99JY4;E9Q7A5;E9Q8R5;Q8CF50
																		Q9DC51;Q3TJH1
																		Q8BTX6;Q9CZU3;Q91YT4;Q6ZQK1;Q8BVI7
																		Q3U8R9;Q8CDN6;Q3UNH3;Q3UBF4
																		Q8BXA5
																		Q684Q8;B1AUY7;Q540H0;Q9QY36;B1AUY8;B1AUY9;B1AUZ1
																		Q8BXJ6;Q8BGV0;D3YV21
																		Q5NCK8;Q9WTU6-3;Q9WTU6-4;Q9WTU6-2;Q9WTU6;Q8C094
																		Q8R3L2;B2ZAC8;Q8R3L2-3;Q8R3L2-2;Q8R3L2-5;Q8R3L2-4;Q80TL2
																		Q8R4H9;Q9JKN2;Q8C2T4;Q05C53
																		Q3UYM1;P54729;A0PJ90;A0JLP6
																		G3X9H5;P42859;P42859-2
																		Q05D44
																		Q68FH8;Q61466-2;Q61466
																		Q3UJC3;O70310
																		B1AT03;Q3UC82;Q3U1F0;Q80ZH7;K4DI59;P97386-2;P97386;Q3TJN5
																		Q6PHQ8;F7A8R0
																		Q3U868;Q921K2;Q3TX36;Q3TM68;Q3TIV3;Q3TF18;Q3UJ03;P11103
																		Q3UMB9
																		A0A067XG53;B9EJ23;B7ZP42;O70589-3;O70589-4;O70589-5;O70589;O70589-2
																		Q3THK3;Q8BVJ2
																		Q9Z0W3;Q9Z0W3-2
																		Q99L04;Q3TVU9
																		G3X9N6;B9EJ86;Q69ZJ4
																		Q99JW5

## Sheet: Uniprot_IDs_anticorrelated
Trait	8G 1st freq.	8G 2nd freq.	8G 1st freq. ampl.	8G 2nd freq. ampl.	8G/QLA 1st freq.	8G/QLA 2nd freq.	8G/QLA 1st freq. ampl.	8G/QLA 2nd freq. ampl.	8G/QLA/GIP 1st freq.	8G/QLA/GIP 2nd freq.	8G/QLA/GIP 1st freq. ampl.	8G/QLA/GIP 2nd freq. ampl.	8G Baseline	8G Peak	8G PF	8G AD	8G PD	8G SP	8G Avg Ca2+	8G Avg Ca2+ change from basal	8G Detrended avg Ca2+	8G Detrended avg Ca2+ change from basal	8G/QLA Baseline	8G/QLA Peak	8G/QLA PF	8G/QLA AD	8G/QLA PD	8G/QLA SP	8G/QLA Avg Ca2+	8G/QLA Avg Ca2+ change from basal	8G/QLA Detrended avg Ca2+	8G/QLA Detrended avg Ca2+ change from basal	8G/QLA/GIP Baseline	8G/QLA/GIP Peak	8G/QLA/GIP PF	8G/QLA/GIP AD	8G/QLA/GIP PD	8G/QLA/GIP SP	8G/QLA/GIP Avg Ca2+	8G/QLA/GIP Avg Ca2+ change from basal	8G/QLA/GIP Detrended avg Ca2+	8G/QLA/GIP Detrended avg Ca2+ change from basal	Basal Ca2+ Avg Ca2+
Protein IDs	Q91YL3	Q2TBE6	Q3U647;Q60967;Q6NZM8;Q3TUA8	Q3U647;Q60967;Q6NZM8;Q3TUA8	Q5SSW2	Q5SSW2	Q9CZX8;Q5M9P3;D3YUT3;D3Z722;D3Z5R8;D3YUG3	Q9CZX8;Q5M9P3;D3YUT3;D3Z722;D3Z5R8;D3YUG3	A2AQL0;Q9Z1W9;G1JLS7;Q3V256	Q06138	Q3U647;Q60967;Q6NZM8;Q3TUA8	Q9CZX8;Q5M9P3;D3YUT3;D3Z722;D3Z5R8;D3YUG3	Q64471;Q9DCY6;D3Z3X5	Q8C1B7-3;Q8C1B7-2;Q8C1B7	F8VQ95;Q6Y685;Q6Y685-2	U5LK19;E9Q5B0;Q80VC9-2;Q80VC9;U5LGS1;U5LHW1;U5LK70;U5LK15;U5LHT8;U5LGR7;U5LGT0;U5LHW9;U5LK79;U5LK24;U5LHU4;U5LGS5;U5LHW4;U5LK74	Q91XU0;Q91XU0-2	Q8C605;Q9WUA3;Q9WUA3-2	Q9R1C7-2;Q9R1C7	F7BJK1;Q2TJI9	Q9R1C7-2;Q9R1C7	Q9R1C7-2;Q9R1C7	Q3UW32;Q9EST5;Q9EST5-2	Q8C1B7-3;Q8C1B7-2;Q8C1B7	Q64685;Q9JJM6	Q64685;Q9JJM6	Q64685;Q9JJM6	Q8C5R8;Q32M04;Q9CVZ1	Q9R1C7-2;Q9R1C7	F7BJK1;Q2TJI9	Q3TLE4;Q8BQ46;F6QCI0	Q3TLE4;Q8BQ46;F6QCI0	Q9D820;Q9D820-2	Q3TLE4;Q8BQ46;F6QCI0	Q64685;Q9JJM6	Q64685;Q9JJM6	Q64685;Q9JJM6	P40630-2	Q9CQQ8	F7BJK1;Q2TJI9	Q3TLE4;Q8BQ46;F6QCI0	Q3TLE4;Q8BQ46;F6QCI0	Q6P069-2;Q6P069
	Q2TBE6	Q91YL3	Q80T06;Q91VK2;P57776;E9QN08;D3YY68;D3YUQ9;D3YZT9	Q80T06;Q91VK2;P57776;E9QN08;D3YY68;D3YUQ9;D3YZT9	Q3UFK0;Q3TSZ8;Q3TI59;P21995	Q3URE1	Q9D0R8	Q9D0R8	Q3TDI5;Q8VCI5;Q8VCI5-2	P60904;G5E8T0;A2AUE1;Q921J3	Q8CGA0	Q8CGA0	Q9JM14;A2A9X5	Q8C0C7;E9PWY9;Q8BJG2;Q8BXN0;Q4FJQ2	Q64685;Q9JJM6	Q91XU0;Q91XU0-2	U5LK19;E9Q5B0;Q80VC9-2;Q80VC9;U5LGS1;U5LHW1;U5LK70;U5LK15;U5LHT8;U5LGR7;U5LGT0;U5LHW9	Q9QZ06;Q8BQL7;A9JEI5;Q8C5G6	Q3TGF2	P97855;Q571F9;Q3UR88	Q00PI9	Q00PI9	Q7TMY4;Q7TMY4-2	Q3TLE4;Q8BQ46;F6QCI0	Q5SUC8;P52624;E9Q5K7	P97807-2;P97807	P97807-2;P97807	O88569;O88569-2;O88569-3;B7ZP22	Q9CQQ8	P97855;Q571F9;Q3UR88	Q9R1C7-2;Q9R1C7	Q9R1C7-2;Q9R1C7	E9Q7L3;D3Z1W6;E9Q7L2;D3Z1N4;E9Q4Y5;F8VQD1;Q8BSQ9-2;Q8BSQ9;D3YYF2;D6RIL0;D6RI94;D3Z3R4;F6THL5	Q9D820;Q9D820-2	Q5SUC8;P52624;E9Q5K7	Q5SUC8;P52624;E9Q5K7	Q5SUC8;P52624;E9Q5K7	Q9CQR6	Q9R1C7-2;Q9R1C7	Q3TLE4;Q8BQ46;F6QCI0	F7BJK1;Q2TJI9	F7BJK1;Q2TJI9	Q8BME2;Q7TMF3
	Q8BQW4;A2AH25;Q5FWK3;Q8C5A0	Q8BQW4;A2AH25;Q5FWK3;Q8C5A0	Q61699;Q61699-2;E9Q0U7	A2AEX8;A2AEX6;P97447;A2AEX7;A2AEY1;A2AEY2;P97447-2	Q3URE1	Q3UFK0;Q3TSZ8;Q3TI59;P21995	Q9DC23	Q9DC23	Q5D0A4;Q497P1;O35526;D6RFB9	Q3UE19;Q3TVV9;Q6P5E6;Q6P5E6-2	Q80T06;Q91VK2;P57776;E9QN08;D3YY68;D3YUQ9;D3YZT9	Q3U647;Q60967;Q6NZM8;Q3TUA8	Q8BUY8	E9Q1G8;Q8C2A3;E9Q9F5;O55131;Q3UNN1;Q5DTS3	Q3U186	Q543N3;Q61792;A2A6H0;A2A6G9;A2A6G7;A2A6G8;A2A6G6;A2A6H1;A2A6G5;E9Q0N6;A2A6G0;A2A6G4	Q543N3;Q61792;A2A6H0;A2A6G9;A2A6G7;A2A6G8;A2A6G6	Q3UKQ3;Q3U6Q1;Q923D5;Q3TXH8	Q00PI9	F6ZDS4	Q9R060	Q9R060	Q9D820;Q9D820-2	D3Z589;D3YU22;D3YU59;Q3UH68-3;Q3UH68;Q8CGB7;Q3UH68-2	Q91YL3	Q5SUC8;P52624;E9Q5K7	Q5SUC8;P52624;E9Q5K7	Q9CSU0-2;Q9CSU0;Q9CSU0-3;F6YB25	Q3TGF2	F6ZDS4	A2RRK3;O54988-2	A2RRK3;O54988-2	P97855;Q571F9;Q3UR88	Q9CQQ8	P17156;B7U582	P97807-2;P97807	P97807-2;P97807	Q8C5R8;Q32M04;Q9CVZ1	Q3TGF2	P97855;Q571F9;Q3UR88	A2RRK3;O54988-2	Q8BK29;B1AT82;Q9D0M1;B1AT83	Q9DAS9
	O08529;Q3U3A8;Q3U8S5;Q8R486;Q8BPV9	O08529;Q3U3A8;Q3U8S5;Q8R486;Q8BPV9	A2AEX8;A2AEX6;P97447;A2AEX7;A2AEY1;A2AEY2;P97447-2	Q8C1B7-3;Q8C1B7-2;Q8C1B7	V9GXE6;I6L9E0;Q3U3J6;A2ALA6;P09925	V9GXE6;I6L9E0;Q3U3J6;A2ALA6;P09925	Q3TDD8;Q3TSY9;Q8BGD9;Q3UGC0;Q3THB0;Q922K6;B2RWE8	Q8CGA0	P60904;G5E8T0;A2AUE1;Q921J3	Q9CQD1	Q9CZX8;Q5M9P3;D3YUT3;D3Z722;D3Z5R8;D3YUG3	E9Q1G8;Q8C2A3;E9Q9F5;O55131;Q3UNN1;Q5DTS3	Q9CXN7;D3Z2D7	Q80T06;Q91VK2;P57776;E9QN08;D3YY68;D3YUQ9;D3YZT9	Q9D927	A2AW05;Q05DR5;Q08943;Q08943-2	A2AW05;Q05DR5;Q08943;Q08943-2	P12968	F6ZDS4	Q6WVG3;Q69ZA6	F6ZDS4	F6ZDS4	G3UZY2;P97493	Q9D820;Q9D820-2	P17156;B7U582	Q9EP52	Q9EP52	Q8C2Q3;Q3U6A2;E9QL13;Q8C2Q3-2;Q62019	Q00PI9	A2RRK3;O54988-2	Q8BK29;B1AT82;Q9D0M1;B1AT83	Q8BK29;B1AT82;Q9D0M1;B1AT83	Q5FWB6;E9Q070;D3YVM5	D3Z589;D3YU22;D3YU59;Q3UH68-3;Q3UH68;Q8CGB7;Q3UH68-2	Q91YL3	Q8R0F3;E9Q265;E9Q0Z7	Q8R0F3;E9Q265;E9Q0Z7	Q542U7;P62313	Q8CA98;Q8C535;O54786-2;O54786	F6ZDS4	Q8BQ47;D3Z0T5	A2RRK3;O54988-2	Q91VD9;Q3TIU7;Q3UIQ2
	Q3UUH0;Q91YI0;E0CXM2;E0CY49	Q3UUH0;Q91YI0;E0CXM2;E0CY49	Q8CAJ7;Q3U3I6;Q3TVK3;Q9Z2W0;Q8BPW9	E9Q1G8;Q8C2A3;E9Q9F5;O55131;Q3UNN1;Q5DTS3	Q3TMH3;Q3TEZ2;Q99ME2;Q8R539	Q3TMH3;Q3TEZ2;Q99ME2;Q8R539	Q8CGA0	Q3TDD8;Q3TSY9;Q8BGD9;Q3UGC0;Q3THB0;Q922K6;B2RWE8	Q8R5C0;F7C846;D3Z3F4;P47802;D3YVW0;G3XA75;G3UYJ5;G3UXX9	Q8R5C0;F7C846;D3Z3F4;P47802;D3YVW0;G3XA75;G3UYJ5;G3UXX9	E9Q1G8;Q8C2A3;E9Q9F5;O55131;Q3UNN1;Q5DTS3	Q80T06;Q91VK2;P57776;E9QN08;D3YY68;D3YUQ9;D3YZT9	Q6P5D8	Q8CAJ7;Q3U3I6;Q3TVK3;Q9Z2W0;Q8BPW9	Q5SUC8;P52624;E9Q5K7	Q9ME04;Q7JCY6;P03911;W0TGY1;F1JVR2;A9UIX0;Q3UQ59;A0A075DCI1;Q3UPP3	Q4VBC9;O09111	P10853;A0JLV3;B2RVD5;Q8CBB6;Q921L4;Q8CGP1;Q8CGP2;Q8CGP2-2;A0JNS9;P70696	Q9R060	Q9R1C7-2;Q9R1C7	A2RRK3;O54988-2	Q6WVG3;Q69ZA6	Q99JR8-2;Q99JR8;Q3TXH6;Q3TM59	Q91VR5;Q922B8;Q3V1Z7	P97807-2;P97807	Q8R0F3;E9Q265;E9Q0Z7	Q8R0F3;E9Q265;E9Q0Z7	I1E4X7;Q9JI46;H3BLR8;B2KF67	F6ZDS4	Q3TLE4;Q8BQ46;F6QCI0	F6ZDS4	F6ZDS4	Q3TLE4;Q8BQ46;F6QCI0	Q8BK29;B1AT82;Q9D0M1;B1AT83	Q3TCE7;Q91Z25;Q9WV32;Q3U094;Q3TBA2	P17156;B7U582	P17156;B7U582	D3YUM1;Q91YT0;D3Z1U9	Q9D820;Q9D820-2	E9Q7L3;D3Z1W6;E9Q7L2;D3Z1N4;E9Q4Y5;F8VQD1;Q8BSQ9-2;Q8BSQ9;D3YYF2;D6RIL0;D6RI94;D3Z3R4;F6THL5	Q9CQQ8	Q8BQ47;D3Z0T5	P52760
	D3Z5I1;Q3UPF5-2;Q3UPF5;G3X9X5;Q8K302	D3Z5I1;Q3UPF5-2;Q3UPF5;G3X9X5;Q8K302	Q8C1B7-3;Q8C1B7-2;Q8C1B7	Q61699;Q61699-2;E9Q0U7	Q9JM62;Q9JM62-2	Q545I6;Q9WUU7;Q9ES94	Q8C1L7;Q9CQR2	Q8C1L7;Q9CQR2	Q06138	Q3TB24;Q9QYI5;Q9QYI5-2	Q9D881;P19536	Q8C1L7;Q9CQR2	Q922H4;Q3UNC0	Q76MZ3;Q8C2E1;Q7TMX2	Q64471;Q9DCY6;D3Z3X5	Q4VBC9;O09111	Q9ME04;Q7JCY6;P03911;W0TGY1;F1JVR2;A9UIX0;Q3UQ59;A0A075DCI1	A4FUS1;P14131;Q641N3;Q5CZY9	P49443;Q9EQE2;Q9EQE3;Q8R4T7	E9Q7L3;D3Z1W6;E9Q7L2;D3Z1N4;E9Q4Y5;F8VQD1;Q8BSQ9-2;Q8BSQ9;D3YYF2;D6RIL0;D6RI94;D3Z3R4;F6THL5	F7BJK1;Q2TJI9	A2RRK3;O54988-2	Q00PI9	Q80T06;Q91VK2;P57776;E9QN08;D3YY68;D3YUQ9;D3YZT9	D3Z5I1;Q3UPF5-2;Q3UPF5;G3X9X5;Q8K302	Q9QWR8	Q9QWR8	Q545L9;F7D432;E9PWE0;E0CYV0;P23506;P23506-2;Q8BPI6;F6V9F1	Q9D820;Q9D820-2	Q9R1C7-2;Q9R1C7	F7BJK1;Q2TJI9	D3Z589;D3YU22;D3YU59;Q3UH68-3;Q3UH68;Q8CGB7;Q3UH68-2	Q8BK29;B1AT82;Q9D0M1;B1AT83	Q8C1B7-3;Q8C1B7-2;Q8C1B7	O78207;W5XQG0;Q792Z7;P01899;Q31168;Q31167;O78206;O19467;Q569W0	Q60520;Q60520-1	Q60520;Q60520-1	P56391	Q00PI9	A2RRK3;O54988-2	Q8BK29;B1AT82;Q9D0M1;B1AT83	F6ZDS4	D3Z5B1;Q8CEW7;B2RPU8;Q9D1L0
	Q3TMB8;P54822;E9Q242;E9Q3T7	Q3TMB8;P54822;E9Q242;E9Q3T7	E9Q1G8;Q8C2A3;E9Q9F5;O55131;Q3UNN1;Q5DTS3	Q8CAJ7;Q3U3I6;Q3TVK3;Q9Z2W0;Q8BPW9	Q3UJ95;Q80XI4;Q91XU2	Q3V100;Q924M7	Q5M9P7;Q9CR86;Q3UD53;Q3U434	Q5M9P7;Q9CR86;Q3UD53;Q3U434	B7ZN52;F6TFN2	B7ZN52;F6TFN2	Q61655	Q8VBT9;Q8VBT9-3;Q8VBT9-2	Q8K2T8	Q3U647;Q60967;Q6NZM8;Q3TUA8	Q6PAC1;P13020-2;Q3UCW8;P13020;Q3U9Q8;Q3TGJ9	Q3TC72	Q9CQZ5	Q8CFV9	Q99LX5	A2RRK3;O54988-2	Q6WVG3;Q69ZA6	Q8BK29;B1AT82;Q9D0M1;B1AT83	P70288;Q8BQ10;Q3UXH8	Q3TH46;Q3U111;P26043;Q7TSG6;Q8C2N4;Q05CE6	Q80WM4	Q60520;Q60520-1	Q60520;Q60520-1	Q8BTV2-2;Q8BTV2	Q8K4Z5;Q3TVM1	Q8BK29;B1AT82;Q9D0M1;B1AT83	D3Z589;D3YU22;D3YU59;Q3UH68-3;Q3UH68;Q8CGB7;Q3UH68-2	F7BJK1;Q2TJI9	Q9EQU5-2;A2BE93;Q3T9S3;Q9EQU5;A2BE92;Q5U445	Q91VR5;Q922B8;Q3V1Z7	Q9CZS7;Q544E3;O70172;F6RJE8	D3Z5I1;Q3UPF5-2;Q3UPF5;G3X9X5;Q8K302	D3Z5I1;Q3UPF5-2;Q3UPF5;G3X9X5;Q8K302	P12787	F6ZDS4	Q8BK29;B1AT82;Q9D0M1;B1AT83	Q8K1Z0;F6SFF5	Q8K1Z0;F6SFF5	O88986;Q9CZ08;E9PWY6
	Q64685;Q9JJM6	Q64685;Q9JJM6	Q8BGD8	P48678;P48678-2;P48678-3	Q8BGU5-2;Q8BGU5	Q91W40;D3Z710	A2BGI8;Q4G0C5;Q3UWH9;Q9D868-2;Q3UY37;Q9D868;A2BGI9	A2BGI8;Q4G0C5;Q3UWH9;Q9D868-2;Q3UY37;Q9D868;A2BGI9	Q3TB24;Q9QYI5;Q9QYI5-2	Q3TDI5;Q8VCI5;Q8VCI5-2	Q059U9;Q9DBR0	Q3TDD8;Q3TSY9;Q8BGD9;Q3UGC0;Q3THB0;Q922K6;B2RWE8	E9PXB7;G3X9H8;Q3TQK9;Q8CFI0-3;Q8CFI0;Q641N8;Q8CFI0-2	Q9CXW4;E9PYL9;Q8VC94;A2BH06	P42232	Q9CQ54;Q9D846	Q91VD9;Q3TIU7;Q3UIQ2	P08249	Q9D820;Q9D820-2	Q8BK29;B1AT82;Q9D0M1;B1AT83	Q8BK29;B1AT82;Q9D0M1;B1AT83	F7BJK1;Q2TJI9	Q9R1C7-2;Q9R1C7	P11031	Q5SW83;P61161;Q8BMA4	P17156;B7U582	P17156;B7U582	Q9D6F9	A2RRK3;O54988-2	E9Q7L3;D3Z1W6;E9Q7L2;D3Z1N4;E9Q4Y5;F8VQD1;Q8BSQ9-2;Q8BSQ9;D3YYF2;D6RIL0;D6RI94;D3Z3R4;F6THL5	Q00PI9	Q00PI9	D3Z589;D3YU22;D3YU59;Q3UH68-3;Q3UH68;Q8CGB7;Q3UH68-2	Q8BQ47;D3Z0T5	D3Z5I1;Q3UPF5-2;Q3UPF5;G3X9X5;Q8K302	Q9QWR8	Q9QWR8	Q99LC5	F7BJK1;Q2TJI9	Q80W65	F6ZDS4	P97855;Q571F9;Q3UR88	P52503
	A9E3L2;Q9Z2I2;Q80YE1;Q810R7	Q3T9Z2;Q91Z53	P48678;P48678-2;P48678-3	Q5SWJ8;P60060;G3UWH0	Q545I6;Q9WUU7;Q9ES94	Q8K4P0	Q8VBT9;Q8VBT9-3;Q8VBT9-2	P62077	O08601;O08601-2;Q3UWK4	A2AQL0;Q9Z1W9;G1JLS7;Q3V256	A2BGI8;Q4G0C5;Q3UWH9;Q9D868-2;Q3UY37;Q9D868;A2BGI9	Q9D881;P19536	Q8C7V8-2;Q8C7V8;Q3V212	Q63918	Q8R409;Q8VDF7	Q11011;E9Q039;F6QYF8;E9Q6F4;F7ANF4;F6V7K3;F2Z3V5	Q8BXZ1	Q3U484;Q62095	F7BJK1;Q2TJI9	P97868-2;P97868	D3Z589;D3YU22;D3YU59;Q3UH68-3;Q3UH68;Q8CGB7;Q3UH68-2	P97855;Q571F9;Q3UR88	Q3UX26;Q9DCE5	Q9R1C7-2;Q9R1C7	Q9CZS7;Q544E3;O70172;F6RJE8	B2RUS7;Q8BNE2;Q6PGE2;Q9Z2P1	Q9CPS6;F8WH96	Q8BGH2	P49443;Q9EQE2;Q9EQE3;Q8R4T7	D3Z589;D3YU22;D3YU59;Q3UH68-3;Q3UH68;Q8CGB7;Q3UH68-2	Q9D820;Q9D820-2	Q9D820;Q9D820-2	Q80W65	A2RRK3;O54988-2	Q3UKA4;P00329	Q91YL3	Q91YL3	Q8CFV9	Q99LP6;Q3UTB8	Q9R1C7-2;Q9R1C7	P97855;Q571F9;Q3UR88	Q9CQQ8	Q9JHU9
	Q3V384;F6VT60	A9E3L2;Q9Z2I2;Q80YE1;Q810R7	Q5SWJ8;P60060;G3UWH0	Q8BGD8	Q3V100;Q924M7	Q91V01	P62077	Q8VBT9;Q8VBT9-3;Q8VBT9-2	Q69Z43;Q8K1R7	B2RQR5;Q3TDT4;Q8BPQ7;D3Z7V4;D3YUT7	P62077	Q61655	Q99JT9;F7ARY2	Q4FJU3;Q9DCT8	B7ZP20	O08847;P08775;Q3TC95	A4FUT9;D3YUP9;D6QSS8;Q9R1V6-19;Q9R1V6-2;Q9R1V6-18;Q9R1V6-21;Q9R1V6-20;Q9R1V6-1;Q9R1V6-9;Q9R1V6-5;Q9R1V6-4;Q9R1V6-17;Q9R1V6-16;Q9R1V6-6;Q9R1V6;Q9R1V6-7;Q9R1V6-10;Q9R1V6-13;Q9R1V6-15;Q9R1V6-8;Q9R1V6-14;Q9R1V6-11;Q9R1V6-12;D3YUQ0	Q9D6R2;Q9D6R2-2	Q540P4;Q9EPC5;F6R1Y3	Q00PI9	P97855;Q571F9;Q3UR88	D3Z589;D3YU22;D3YU59;Q3UH68-3;Q3UH68;Q8CGB7;Q3UH68-2	P97855;Q571F9;Q3UR88	Q9CXI0	Q3TCE7;Q91Z25;Q9WV32;Q3U094;Q3TBA2	Q9CPS6;F8WH96	B2RUS7;Q8BNE2;Q6PGE2;Q9Z2P1	Q3UGB5;Q9JII5-2;Q9JII5;Q3U878;D3Z4J1	F7BJK1;Q2TJI9	Q00PI9	Q3TH46;Q3U111;P26043;Q7TSG6;Q8C2N4;Q05CE6	P97855;Q571F9;Q3UR88	Q7TT04;Q3UJY4;P59235;Q3URN3	Q9R1C7-2;Q9R1C7	Q99K01-2	Q9EP52	Q9EP52	Q9CPP6;Q9CX78	Q8K4Z5;Q3TVM1	Q8BQ47;D3Z0T5	D3Z4U0;B2RRT9;D3Z4T9;Q9R020;E9PUD0	Q80W65	Q102J0;Q8R242;Q8R242-2
	Q3T9Z2;Q91Z53	Q3V384;F6VT60	Q3U2G2;Q571M2;Q61316	Q3U2G2;Q571M2;Q61316	Q91W40;D3Z710	P70698	Q80T06;Q91VK2;P57776;E9QN08;D3YY68;D3YUQ9;D3YZT9	Q9QZD9;Q3T9Y8	Q9DBJ3	Q99J39;Q99J39-2;Q569V6	Q8C1L7;Q9CQR2	P62077	Q8K3X6	Q5FWB6;E9Q070;D3YVM5	Q8K212;Q3TAB8;Q3TP27	Q9CQZ5	Q9CQ54;Q9D846	Q91WS0	Q99JT9;F7ARY2	Q9CXW4;E9PYL9;Q8VC94;A2BH06	Q9D820;Q9D820-2	Q5FWB6;E9Q070;D3YVM5	Q3UMM1;Q922F4;Q3U9U3;Q9CUN8	A2ADR8;Q8R3G1	Q9QWR8	D3Z5I1;Q3UPF5-2;Q3UPF5;G3X9X5;Q8K302	D3Z5I1;Q3UPF5-2;Q3UPF5;G3X9X5;Q8K302	Q8BTI8-3;Q8BTI8;Q8BTI8-2	Q8CA98;Q8C535;O54786-2;O54786	O54988	P51859;E0CXA0	P51859;E0CXA0	G3UZY2;P97493	F6ZDS4	A0A068BIT8;P28063;G3UZW8	Q9ER58;F6SLR4;Q80U51;Q6PAN0	Q2M4G8;O35239	Q8CAQ8-2;Q3TVZ5;Q3TQL4;Q3U7N2	Q8BQ47;D3Z0T5	Q4VA29;Q9CQE8;J3QNB0	E9Q7L3;D3Z1W6;E9Q7L2;D3Z1N4;E9Q4Y5;F8VQD1;Q8BSQ9-2;Q8BSQ9;D3YYF2;D6RIL0;D6RI94;D3Z3R4;F6THL5	E9Q7L3;D3Z1W6;E9Q7L2;D3Z1N4;E9Q4Y5;F8VQD1;Q8BSQ9-2;Q8BSQ9;D3YYF2;D6RIL0;D6RI94;D3Z3R4;F6THL5	Q99LC3
	P60766;Q3UL78	P60766;Q3UL78	P11031	P11031	Q8K4P0	Q3TDI5;Q8VCI5;Q8VCI5-2	Q9QZD9;Q3T9Y8	Q80T06;Q91VK2;P57776;E9QN08;D3YY68;D3YUQ9;D3YZT9	Q3UE19;Q3TVV9;Q6P5E6;Q6P5E6-2	G5E8J9;Q8CFE4	Q3UTJ2	Q059U9;Q9DBR0	Q8CI51;Q8CI51-2	A2AEX8;A2AEX6;P97447;A2AEX7;A2AEY1;A2AEY2;P97447-2	O08847;P08775	Q9CZD3;Q9DBT1	O08847;P08775	Q0VDY5;Q3UFJ9;Q924A4	Q9WVA3	Q5FWB6;E9Q070;D3YVM5	Q5FWB6;E9Q070;D3YVM5	Q3U6P5;Q9Z204;Q9Z204-5	Q3TUI3;Q8K2F0;Q05DR7;Q4G5Y4;Q5CCJ9;Q8K2F0-2;A2AKA9;Q53TY6	A2RRK3;O54988-2	O78207;W5XQG0;Q792Z7;P01899;Q31168;Q31167;O78206;O19467;Q569W0	Q9ER58;F6SLR4;Q80U51;Q6PAN0	P42232	Q8K0D5	Q9WVA3	P51859;E0CXA0	P97855;Q571F9;Q3UR88	Q3TH46;Q3U111;P26043;Q7TSG6;Q8C2N4;Q05CE6	Q99JR8-2;Q99JR8;Q3TXH6;Q3TM59	P11031	Q2M4G8;O35239	Q4FJQ8;Q3UAX2;Q8C562;Q3UC81;Q3UB98;Q3UB54;Q3U841;Q3U784;Q3U5U0;P11152;Q3UCZ2;Q3UCD4;Q3UC44;Q3UBE9;Q3U715;Q3UCH4;Q3U6S8	Q9ER58;F6SLR4;Q80U51;Q6PAN0	Q923B1	A2RRK3;O54988-2	O54988	Q80W65	Q9R1C7-2;Q9R1C7	P56379
	Q9JM62;Q9JM62-2	Q9JM62;Q9JM62-2	Q91VR5;Q922B8;Q3V1Z7	Q8C4Q6;Q8C4Q6-2	Q3TDI5;Q8VCI5;Q8VCI5-2	Q9JM62;Q9JM62-2	H7BWX9;D3Z794;P61957	H7BWX9;D3Z794;P61957	Q9CXL3	Q5D0A4;Q497P1;O35526;D6RFB9	Q8VBT9;Q8VBT9-3;Q8VBT9-2	Q9QZD9;Q3T9Y8	Q548T0;Q64324;Q99J48;F8WGM5	Q60951;Q3UBT1;P62960;Q71V06;Q810K5;Q60950	Q544F6;Q9CQI6	Q8BXZ1	Q3TC72	Q60930;G3UX26;D3YZT5	A2RRK3;O54988-2	Q9EQU5-2;A2BE93;Q3T9S3;Q9EQU5;A2BE92;Q5U445	Q3U6P5;Q9Z204;Q9Z204-5	Q9D820;Q9D820-2	Q3UNF2;P97470	Q61699;Q61699-2;E9Q0U7	Q3TDA1;Q8BX94;Q571D2	Q4FJQ8;Q3UAX2;Q8C562;Q3UC81;Q3UB98;Q3UB54;Q3U841;Q3U784;Q3U5U0;P11152;Q3UCZ2;Q3UCD4;Q3UC44;Q3UBE9;Q3U715;Q3UCH4;Q3U6S8	Q9ER58;F6SLR4;Q80U51;Q6PAN0	D3Z4U5;D3Z555;G3UYZ9;Q8BVL9	Q8CIN4	Q6WVG3;Q69ZA6	Q9CQQ8	P11031	Q9CXW4;E9PYL9;Q8VC94;A2BH06	Q9CXI0	Q8BP21;Q545C3;P30285;E9Q9E4;E9PZX7;Q9D193	Q2M4G8;O35239	Q8R121;Q8R121-2	Q8BTV2-2;Q8BTV2	P49443;Q9EQE2;Q9EQE3;Q8R4T7	P97868-2;P97868	Q9R1C7-2;Q9R1C7	D3Z4U0;B2RRT9;D3Z4T9;Q9R020;E9PUD0	Q9D880
	Q99K01-2	Q8BXR1;D3YY38	Q1HFZ0;H3BKN0;Q1HFZ0-2	Q1HFZ0;H3BKN0;Q1HFZ0-2	B2RQR5;Q3TDT4;Q8BPQ7;D3Z7V4;D3YUT7	Q9CR60	D3YWX2;E9Q803;F6YTL8;Q9R0I7	B2RXW8;B2RXQ2;B8QI33	Q80WQ2;Q8CCX6;Q8C907	Q3ZAW0;Q104P0;B7ZP48;O35659	Q8BWR2;B1AV57;Q8BWR2-2	A2BGI8;Q4G0C5;Q3UWH9;Q9D868-2;Q3UY37;Q9D868;A2BGI9	Q8K268	Q3TYL7;Q3TU79;Q3TIT6;Q9QYJ3	Q50HX4;Q50HX2;Q91V41;Q50HX0;Q50HX3;Q50HX1;A2AL34;Q50HW9	Q91VD9;Q3TIU7;Q3UIQ2;A0A087WQR0;A0A087WP77;A0A087WQ77;A0A087WR47	Q80W12;Q3TJ75;O08848;Q8R562	Q3UFJ3;P35486	Q9CQQ8	O54988	Q9CXW4;E9PYL9;Q8VC94;A2BH06	Q9CXW4;E9PYL9;Q8VC94;A2BH06	Q9D7F5;Q9D1S1;Q4QQL2;Q3U5V6;P61079;Q05CK8	P51859;E0CXA0	Q8BP21;Q545C3;P30285;E9Q9E4;E9PZX7;Q9D193	P42232	Q8BP21;Q545C3;P30285;E9Q9E4;E9PZX7;Q9D193	Q9JHQ5;Q8CDG8;Q3UHL8;F6VG18;F6VTH5	Q540P4;Q9EPC5;F6R1Y3	Q8BQ47;D3Z0T5	P11031	Q8K4Z5;Q3TVM1	Q9DCY1;P24369	Q8K1Z0;F6SFF5	Q3TDA1;Q8BX94;Q571D2	Q102J0;Q8R242;Q8R242-2	Q9Z2C9;G3V027;I6L9A6;G3UYB7;G3UYZ2	Q0P6B2;Q3TUE1;Q3UUU2;Q91WJ8;Q91WJ8-2;Q3TIS5	Q9D0R8	D3Z589;D3YU22;D3YU59;Q3UH68-3;Q3UH68;Q8CGB7;Q3UH68-2	Q9D820;Q9D820-2	Q9D820;Q9D820-2	Q9DC70
	Q8BXR1;D3YY38	Q99K01-2	Q99KD6;Q3UDK5;E9PZS8;Q61387;Q3U7R2	Q99KD6;Q3UDK5;E9PZS8;Q61387;Q3U7R2	P70698	Q8BGU5-2;Q8BGU5	B2RXW8;B2RXQ2;B8QI33	Q8CE80;P51125-3;P51125-2;P51125-6;P51125;Q921U7;Q8C281;P51125-7;Q8CE04;Q8CB83	A1BN54;Q7TPR4	Q3TRJ1;Q9EQH3;Q3TKU6;Q3TJ43;Q3UQJ1	Q9QZD9;Q3T9Y8	Q8C1B7-3;Q8C1B7-2;Q8C1B7	Q9ES64-3;H3BIZ2;H3BLC4;D6RIM8;Q6XA19;E9PYX1;E9QMN1;Q9ES64-2;Q9ES64	F6ZDS4	P51655	Q8BH59;V9GXX9	C7G3P2;Q61136;Q8BPG8	D2KHZ9;P16858;S4R257;D3YYI5	Q8CIN4	Q4VA29;Q9CQE8;J3QNB0	Q3TGF2	Q3UCW0;Q61187;Q3UK08	P48193;A2A841;P48193-2;A2A842;A2AD32;B6ZHC8	F6ZDS4	P48036	D3Z6J0;Q6SKR2;Q6PRU9;Q4KMV5;E9PXT7	D3Z6J0;Q6SKR2;Q6PRU9;Q4KMV5;E9PXT7	Q8R326-2;Q8R326	A2ADR8;Q8R3G1	Q3TH46;Q3U111;P26043;Q7TSG6;Q8C2N4;Q05CE6	Q8K4Z5;Q3TVM1	Q8BQ47;D3Z0T5	Q8BQ47;D3Z0T5	Q3TH46;Q3U111;P26043;Q7TSG6;Q8C2N4;Q05CE6	Q6P6M7;Q3U597	Q8R121;Q8R121-2	Q102J0;Q8R242;Q8R242-2	D3Z0M9	Q8CIN4	Q9D820;Q9D820-2	D3Z589;D3YU22;D3YU59;Q3UH68-3;Q3UH68;Q8CGB7;Q3UH68-2	D3Z589;D3YU22;D3YU59;Q3UH68-3;Q3UH68;Q8CGB7;Q3UH68-2	Q545V6;P60041
	Q3UKA4;P00329	Q8VD31	Q8C4Q6;Q8C4Q6-2	Q63918	Q3TWV4;Q5FWI9;P84091;Q3TH69;Q6A0C9;Q3UCW9	P97467;F8VQA4;E9Q704;Q3V1A8	Q8CE80;P51125-3;P51125-2;P51125-6;P51125;Q921U7;Q8C281;P51125-7;Q8CE04;Q8CB83	Q9D0J2;Q4FK74;Q9D3D9;Q9DCZ0	Q3UJ95;Q80XI4;Q91XU2	F8WIE1;Q8BWY6;Q3ZCX9;Q91W89;E9PZ88;Q3TBQ3;E9PYM7	Q8C0C7;E9PWY9;Q8BJG2;Q8BXN0;Q4FJQ2	Q8C0C7;E9PWY9;Q8BJG2;Q8BXN0;Q4FJQ2	Q3TXR9;P20060	Q00PI9	Q5FWA0;Q9CQ01	Q9ERS2	Q11011;E9Q039;F6QYF8;E9Q6F4	Q9CQR6	Q3TYX5;L7N466;Q9D110;B2KF83;Q8R1G5	Q80W65	O54988	Q3TGF2	Q921W2;Q545C1;P70318;D6RGU1	Q8BK29;B1AT82;Q9D0M1;B1AT83	G3UXZ5;Q5HZK3;P97371;G3UXY0;G3X9K9;G3UWN9	Q8BP21;Q545C3;P30285;E9Q9E4;E9PZX7;Q9D193	Q4FJQ8;Q3UAX2;Q8C562;Q3UC81;Q3UB98;Q3UB54;Q3U841;Q3U784;Q3U5U0;P11152;Q3UCZ2;Q3UCD4;Q3UC44;Q3UBE9;Q3U715;Q3UCH4;Q3U6S8	Q3TPZ5;Q99KJ8	Q8BQ47;D3Z0T5	Q9D820;Q9D820-2	Q9CXI0	Q9CXI0	Q569X3;Q62241	F7BJK1;Q2TJI9	Q64471;Q9DCY6;D3Z3X5	P42232	P42232	Q569Y6;Q9CZY3;B7ZBY7;E9PY39;Q9CZY3-2	Q3TLE4;Q8BQ46;F6QCI0	A0MNP4;Q9ERF3;Q8BVQ0;D6RDC7	P70158	O54988	Q9CQZ5
	Q8VD31	Q3UKA4;P00329	Q3UK83;Q3U7F3;Q3TIK8;Q5EBP8;P49312;Q3TFB1;P49312-2	Q5SUT0;Q3UI30;Q6NVA3;Q5SUS9;Q61545;Q9CRS5	P97467;F8VQA4;E9Q704;Q3V1A8	Q99KI3	Q5HZY7;Q9CR51;Q3U7E0	Q3U647;Q60967;Q6NZM8;Q3TUA8	F8WIE1;Q8BWY6;Q3ZCX9;Q91W89;E9PZ88;Q3TBQ3;E9PYM7	A2AKI5;P43406;Q3U4C8	O70194	Q3TUF3;O35887;Q3UG11;Q3TQD1;G3UWV3;G3UWR0;G3UY49	Q3ULF7;Q3TWJ4;Q3TGW0;Q99JY9;Q3TGE1	Q4FK54;P61290;A2A4J1	Q9EQH2;Q8C9W5;Q8C4S7	C7G3P2;Q61136;Q8BPG8;Q8C5G1	Q9ERS2	Q3U2Z6;Q3TDY6;O89023	Q3UVI9;Q99LE6	D3Z589;D3YU22;D3YU59;Q3UH68-3;Q3UH68;Q8CGB7;Q3UH68-2	Q3UCW0;Q61187;Q3UK08	O54988	P51859;E0CXA0	Q8BP60;Q99JX7;V9GXF3;V9GXW3	Q3U186	Q3TCD4;Q9WUR2-2;Q9WUR2;E9PYC6;E9Q858;E9PUY9;E9PYA9;E9PVM6;E9Q7A8	Q9Z2C9;G3V027;I6L9A6;G3UYB7;G3UYZ2	Q3TDV0;P62700;Q65Z92;Q3TMG7	Q3TYX5;L7N466;Q9D110;B2KF83;Q8R1G5	Q4VA29;Q9CQE8;J3QNB0	Q8BQ47;D3Z0T5	O54988	Q9R1C7-2;Q9R1C7	P62627;A2AVR9	Q4V9W8;Q91ZR1;Q3USC3	Q9Z2C9;G3V027;I6L9A6;G3UYB7;G3UYZ2	Q4FJQ8;Q3UAX2;Q8C562;Q3UC81;Q3UB98;Q3UB54;Q3U841;Q3U784;Q3U5U0;P11152;Q3UCZ2;Q3UCD4;Q3UC44;Q3UBE9;Q3U715;Q3UCH4;Q3U6S8	O35381;D3Z7M9;D3YYE1;F6UFG6	Q8BFR5;D3YVN7;Q8BFR5-2	Q6WVG3;Q69ZA6	A0MNP4;Q9ERF3;Q8BVQ0;D6RDC7	A0MNP4;Q9ERF3;Q8BVQ0;D6RDC7	Q9D023
	Q3TCD4;Q9WUR2-2;Q9WUR2;E9PYC6;E9Q858;E9PUY9;E9PYA9;E9PVM6;E9Q7A8	Q8R1G2	Q5SUT0;Q3UI30;Q6NVA3;Q5SUS9;Q61545;Q9CRS5	Q3UK83;Q3U7F3;Q3TIK8;Q5EBP8;P49312;Q3TFB1;P49312-2	Q9CR60	Q91XF0	Q9D0J2;Q4FK74;Q9D3D9;Q9DCZ0	D3YWX2;E9Q803;F6YTL8;Q9R0I7	O35598;E9PYF2	Q3UJ95;Q80XI4;Q91XU2	Q8C1B7-3;Q8C1B7-2;Q8C1B7	Q8BTX5;Q5M9L0;Q3TII2;Q91WK2;Q3THW7;Q3TIK5	P52479;P52479-2	Q3UD26;O35593;Q9CSU2	Q9CPS6;F8WH96	D3YXR8;Q80U40-2;Q80U40	Q9CR61	Q8CGC4;Q4KL69;Q8BM41	Q9WVQ5	Q99LB4;Q3UJ44;D3YTL5;Q3TNN6;P24452;D3YZN3;D3YU77	Q3TUF3;O35887;Q3UG11;Q3TQD1;G3UWV3;G3UWR0;G3UY49	Q3UW32;Q9EST5;Q9EST5-2	E9QJV4;A0PJ46;Q8K2Z2	Q9CQQ8	Q3UKA4;P00329	Q9Z2C9;G3V027;I6L9A6;G3UYB7;G3UYZ2	P56376;Q4VAF0;E9QJT5	D3YUM1;Q91YT0;D3Z1U9	Q9CXI0	P97868-2;P97868	O54988	Q9CQQ8	Q3UW32;Q9EST5;Q9EST5-2	Q80T06;Q91VK2;P57776;E9QN08;D3YY68;D3YUQ9;D3YZT9	G3UXZ5;Q5HZK3;P97371;G3UXY0;G3X9K9;G3UWN9	Q542R8;O70443;Q3UYF9	Q542R8;O70443;Q3UYF9	O88569;O88569-2;O88569-3;B7ZP22	Q3TYX5;L7N466;Q9D110;B2KF83;Q8R1G5	Q99LB4;Q3UJ44;D3YTL5;Q3TNN6;P24452;D3YZN3;D3YU77	O54988	Q4VA29;Q9CQE8;J3QNB0	Q3UD98;Q91VU6;Q3TYA0;D3Z4U8;Q91VU6-2;D6RCG5;D3YVR5;D3Z2V1
	Q8K064	Q8K064	Q63918	Q3TJ01;Q99LF4	Q3U8S0;Q9DCR2	D3Z4P2;P59481	Q3U647;Q60967;Q6NZM8;Q3TUA8	Q8BH44;G3UW48	Q3V100;Q924M7	Q8BGG0	Q3TDD8;Q3TSY9;Q8BGD9;Q3UGC0;Q3THB0;Q922K6;B2RWE8	Q8BWR2;B1AV57;Q8BWR2-2	Q8BRM2;A0A087WQS3	Q9R1C7-2;Q9R1C7	Q543B9;Q9QUR6;Q3TCS0;Q8C6A3;Q3TQ97	Q5SW83;P61161;Q8BMA4	Q99LC3	Q8K2B3	Q8CA98;Q8C535;O54786-2;O54786	Q9R060	P51859;E0CXA0	Q3TUF3;O35887;Q3UG11;Q3TQD1;G3UWV3;G3UWR0;G3UY49	Q922Z3;Q3UPJ8;Q3TK29;Q9CQN1;Q922R9;Q3TSG8	P62077	D3Z6J0;Q6SKR2;Q6PRU9;Q4KMV5;E9PXT7	A2AKH7;Q8JZX5;Q9CSK4;Q9D1G5	Q542R8;O70443;Q3UYF9	Q8BK67	Q9WVQ5	Q8CIN4	A2ADR8;Q8R3G1	Q8K1L5	P97868-2;P97868	Q8K1L5	Q5SVP3;P97372;G3X9V0;E0CZ90	Q9CPS6;F8WH96	Q9CPS6;F8WH96	Q80W12;Q3TJ75;O08848;Q8R562	Q9WVQ5	Q3TH46;Q3U111;P26043;Q7TSG6;Q8C2N4;Q05CE6	Q4VA29;Q9CQE8;J3QNB0	P70158	D3Z3N4;D3YWT1
	Q9Z2C9;G3V027;I6L9A6;G3UYB7;G3UYZ2	Q6PAC1;P13020-2;Q3UCW8;P13020;Q3U9Q8;Q3TGJ9	Q3TJ01;Q99LF4	Q76MZ3;Q8C2E1;Q7TMX2	Q91V01	P00920	Q8BH44;G3UW48	Q5HZY7;Q9CR51;Q3U7E0	Q8R1U1;G3UWH9;Q7TSQ9	Q8BGU5-2;Q8BGU5	P70122;F6TN03	P70122;F6TN03	Q544F6;Q9CQI6	Q3TUF3;O35887;Q3UG11;Q3TQD1;G3UWV3;G3UWR0;G3UY49	Q501L4;Q3UAY3;Q8BMQ2;Q3UJL1;E9Q2B0;Q8BMQ2-2	A4FUT9;D3YUP9;D6QSS8;Q9R1V6-19;Q9R1V6-2;Q9R1V6-18;Q9R1V6-21;Q9R1V6-20;Q9R1V6-1;Q9R1V6-9;Q9R1V6-5;Q9R1V6-4;Q9R1V6-17;Q9R1V6-16;Q9R1V6-6;Q9R1V6;Q9R1V6-7;Q9R1V6-10;Q9R1V6-13;Q9R1V6-15;Q9R1V6-8;Q9R1V6-14;Q9R1V6-11;Q9R1V6-12;D3YUQ0;F7CDH3	Q32MU0;P63239	Q6ZWV7;G3UWD7	Q8K4Z5;Q3TVM1	B7ZCL8;Q542P4;P70290;Q684Q6;A2AN84;B7ZCL9	Q3UW32;Q9EST5;Q9EST5-2	Q9EQU5-2;A2BE93;Q3T9S3;Q9EQU5;A2BE92;Q5U445	Q5FWB6;E9Q070;D3YVM5	F8WIG4;Q3TI08;Q3TY03;Q62384;F8WHU9;Q9JJA1;Q3TIH8;Q9CUE2;Q8C8U3	Q9CPS6;F8WH96	P56376;Q4VAF0;E9QJT5	Q3TCD4;Q9WUR2-2;Q9WUR2;E9PYC6;E9Q858;E9PUY9;E9PYA9;E9PVM6;E9Q7A8	P62075	Q3TLE4;Q8BQ46;F6QCI0	Q80W65	Q8K1L5	A2ADR8;Q8R3G1	Q6XLQ8;Q3TL33	Q4VA29;Q9CQE8;J3QNB0	Q9Z0P5-2;Q9Z0P5	P56376;Q4VAF0;E9QJT5	B2RUS7;Q8BNE2;Q6PGE2;Q9Z2P1	Q61425	Q9WVA3	P51859;E0CXA0	Q3TH46;Q3U111;P26043;Q7TSG6;Q8C2N4;Q05CE6	Q3TH46;Q3U111;P26043;Q7TSG6;Q8C2N4;Q05CE6	P97290;A2ATR8
	Q6PAC1;P13020-2;Q3UCW8;P13020;Q3U9Q8;Q3TGJ9	Q9Z2C9;G3V027;I6L9A6;G3UYB7;G3UYZ2	Q61655	Q61655	D3Z4P2;P59481	B2RQR5;Q3TDT4;Q8BPQ7;D3Z7V4;D3YUT7	Q91V55;P97461;D3YYM6	Q9D287;Q05CL7;Q3U5M2	B7ZW94;Q8C3F2;Q8C3F2-3;Q3V3X9	Q3UGC5;Q3TNR7;P59017	Q3TUF3;O35887;Q3UG11;Q3TQD1;G3UWV3;G3UWR0;G3UY49	Q3UHW2;Q3TT11;P51660	Q9R0E1	Q5EAT0;P49962;Q3UIK3;D3YZX8	Q3U1J4;Q91YC8	Q99LC3;A0A087WR38	D3YXR8;Q80U40-2;Q80U40	Q58EA6;P62852	P45952;Q91WS8	Q3TUF3;O35887;Q3UG11;Q3TQD1;G3UWV3;G3UWR0;G3UY49	Q3TH46;Q3U111;P26043;Q7TSG6;Q8C2N4;Q05CE6	P51859;E0CXA0	Q542K0;Q3U5I9;Q9R078	Q3UIJ2;Q3TML6;Q9Z0N1;Q3UDF8;Q9CRE9;Q3U5H6;A2AAW9	Q5SVP3;P97372;G3X9V0;E0CZ90	F8VQ95;Q6Y685;Q6Y685-2	F8VQ95;Q6Y685;Q6Y685-2	Q9CWJ9	P51859;E0CXA0	Q3TUF3;O35887;Q3UG11;Q3TQD1;G3UWV3;G3UWR0;G3UY49	Q8C1B7-3;Q8C1B7-2;Q8C1B7	Q8C1B7-3;Q8C1B7-2;Q8C1B7	A0MNP4;Q9ERF3;Q8BVQ0;D6RDC7	P51859;E0CXA0	Q52L66;Q91W67	B2RUS7;Q8BNE2;Q6PGE2;Q9Z2P1	P56376;Q4VAF0;E9QJT5	P26443;Q3TSQ7	Q3UVI9;Q99LE6	Q8CIN4	Q3TUF3;O35887;Q3UG11;Q3TQD1;G3UWV3;G3UWR0;G3UY49	Q3TUF3;O35887;Q3UG11;Q3TQD1;G3UWV3;G3UWR0;G3UY49	H7BWY6;Q00724;Q3TF08
	Q8R1G2	Q3UDP0	E9Q4Q2;D3YZC9;D3YZD0;Q3UK67;Q3UI45;Q64213-2;Q64213-3;Q64213;Q3TZI3;D3YVH4	Q91VR5;Q922B8;Q3V1Z7	Q91XF0	Q3U8S0;Q9DCR2	Q9D287;Q05CL7;Q3U5M2	Q8BWR2;B1AV57;Q8BWR2-2	Q545I6;Q9WUU7;Q9ES94	Q9JI39	Q3TLQ4;P58064	Q5HZY7;Q9CR51;Q3U7E0	Q91YT7;Q3UNH5	Q9DBE7;A2A5S3;Q3TWP5;Q641P2;Q3TJ07;Q3UTC8;Q3TU43;Q3TWA1;Q3UKX3;A2A5R8;Q3U8D3;Q9Z108;V9GX87;Q3U7A6;Q6TNG5	Q9Z1T1;Q3TQ33;Q3UPG0	Q32MU0;P63239;Q8BRQ2	Q9CZD3	Q545I7;P01325	Q99LB4;Q3UJ44;D3YTL5;Q3TNN6;P24452;D3YZN3;D3YU77	Q3TTF6;H3BKU1;Q8BIX1;G3UWS4;Q7TNP2;H3BLQ0;H3BLE7;H3BIV7	Q9EQU5-2;A2BE93;Q3T9S3;Q9EQU5;A2BE92;Q5U445	Q4FK54;P61290;A2A4J1	Q569X3;Q62241	Q8K1L5	Q64471;Q9DCY6;D3Z3X5	P24638;Q3UZN1;Q3U4F3	A2AKH7;Q8JZX5;Q9CSK4;Q9D1G5	Q58EV5;P63158;Q8C7C4;Q8BNM0;Q6P202;Q497Z6;Q8BQ02;Q3UBK2;Q3UJK0;D3YZ18	Q9WTP6-2;Q9WTP6	Q5FWB6;E9Q070;D3YVM5	P62627;A2AVR9	P62627;A2AVR9	Q61171;Q5M9N9;D3Z4A4	P97855;Q571F9;Q3UR88	Q9Z2C9;G3V027;I6L9A6;G3UYB7;G3UYZ2	Q3TCD4;Q9WUR2-2;Q9WUR2;E9PYC6;E9Q858;E9PUY9;E9PYA9;E9PVM6;E9Q7A8	Q3TCD4;Q9WUR2-2;Q9WUR2;E9PYC6;E9Q858;E9PUY9;E9PYA9;E9PVM6;E9Q7A8	Q9D0M3-2;Q9D0M3	P45952;Q91WS8	Q6XLQ8;Q3TL33	Q9CQ92;G3X9U9	P51859;E0CXA0	Q8BP40
	Q3UDP0	Q3TCD4;Q9WUR2-2;Q9WUR2;E9PYC6;E9Q858;E9PUY9;E9PYA9;E9PVM6;E9Q7A8	B3V097;Q8BIQ5;Q8BIQ5-2;A2AEK1;B3V099	E9Q4Q2;D3YZC9;D3YZD0;Q3UK67;Q3UI45;Q64213-2;Q64213-3;Q64213;Q3TZI3;D3YVH4	Q9DB15	Q61768;E9QAK5	Q059U9;Q9DBR0	Q91V55;P97461;D3YYM6	Q3URE1	Q3URE1	Q8CAJ7;Q3U3I6;Q3TVK3;Q9Z2W0;Q8BPW9	Q3TLQ4;P58064	Q9JJF0;Q9CTE1	Q922E1;Q8C1W8;Q61941;Q3TWH2;Q3TGH1;Q8C9V5;Q8BGK0;Q8C3H2;E9Q8F4	D3Z656;Q8CHC4;E9Q7S0;F7BQW7	Q3UD98;Q91VU6;Q3TYA0;D3Z4U8;Q91VU6-2;D6RCG5;D3YVR5;D3Z2V1;D3YZ95;D3YZ04;D3YWI9;D6REI5	Q8BH59	P58281-2;H7BX01;P58281;Q80TX7;E0CXD1	Q9CXW2	Q3TLE4;Q8BQ46;F6QCI0	Q3TLE4;Q8BQ46;F6QCI0	P48193;A2A841;P48193-2;A2A842;A2AD32;B6ZHC8	A3KG93;Q6ZQ88	E9Q1G8;Q8C2A3;E9Q9F5;O55131;Q3UNN1;Q5DTS3	Q9DBL2;Q9DBL2-2	Q542R8;O70443;Q3UYF9	P24638;Q3UZN1;Q3U4F3	Q9WUM5	Q8BP60;Q99JX7;V9GXF3;V9GXW3	P62627;A2AVR9	Q3TUF3;O35887;Q3UG11;Q3TQD1;G3UWV3;G3UWR0;G3UY49	Q3TUF3;O35887;Q3UG11;Q3TQD1;G3UWV3;G3UWR0;G3UY49	Q3UCW0;Q61187;Q3UK08	D3Z4U0;B2RRT9;D3Z4T9;Q9R020;E9PUD0	P97807-2;P97807	F8VQ95;Q6Y685;Q6Y685-2	F8VQ95;Q6Y685;Q6Y685-2	E0CYB9;Q6PCP5-3;Q6PCP5;F7CTF8;E0CYI3;Q6PCP5-4	Q540P4;Q9EPC5;F6R1Y3	Q3TUF3;O35887;Q3UG11;Q3TQD1;G3UWV3;G3UWR0;G3UY49	Q9CY58;Q3UJK2;Q9CY58-2;Q3UMP4;Q3UEI6;Q9CY58-3;Q3V274;Q9CY58-4	Q8K1L5	P17665
	P48774;E9PVM7;E9PV63	Q8BLV3;Q8BLV3-2	Q76MZ3;Q8C2E1;Q7TMX2	Q9QZ83	P60766;Q3UL78	Q3TEF1;P97494;Q3UNA7	Q9D7E3	Q9D881;P19536	Q3TRJ1;Q9EQH3;Q3TKU6;Q3TJ43;Q3UQJ1	Q9DBJ3	Q3UYP2;Q3TVT6;Q9CQF9;Q99JK4	Q3TGU7;P50580;Q05BN2;Q3UMW2;D3YVH7	H7BXB9;F8WIU1;Q9D1K7	Q64727	Q2M4G8;O35239	Q60520;Q60520-1;Q3UVS7	B7ZNK7;Q3TYD9;P63002;P63002-2	Q3UK24;Q8CBE3	Q921X9	Q7TT04;Q3UJY4;P59235;Q3URN3	Q4FK54;P61290;A2A4J1	Q58E65;Q3UI33;O08663;Q3TMN1	Q61171;Q5M9N9;D3Z4A4	Q921W2;Q545C1;P70318;D6RGU1	Q9EP53-4;Q9EP53-3;Q9EP53-2;Q9EP53	Q91YL3	Q8R121;Q8R121-2	Q0P6B2;Q3TUE1;Q3UUU2;Q91WJ8;Q91WJ8-2;Q3TIS5	Q8R1N0;F8QZ85	Q8C1B7-3;Q8C1B7-2;Q8C1B7	E9Q7L3;D3Z1W6;E9Q7L2;D3Z1N4;E9Q4Y5;F8VQD1;Q8BSQ9-2;Q8BSQ9;D3YYF2;D6RIL0;D6RI94;D3Z3R4;F6THL5	E9Q7L3;D3Z1W6;E9Q7L2;D3Z1N4;E9Q4Y5;F8VQD1;Q8BSQ9-2;Q8BSQ9;D3YYF2;D6RIL0;D6RI94;D3Z3R4;F6THL5	P51859;E0CXA0	Q3TUF3;O35887;Q3UG11;Q3TQD1;G3UWV3;G3UWR0;G3UY49	Q6PAC1;P13020-2;Q3UCW8;P13020;Q3U9Q8;Q3TGJ9	Q64471;Q9DCY6;D3Z3X5	P24638;Q3UZN1;Q3U4F3	Q3TH57;Q8CGF7-2;Q8CGF7;Q8CGF7-3	Q9CXI0	Q00PI9	Q8K1L5	Q9CY58;Q3UJK2;Q9CY58-2;Q3UMP4;Q3UEI6;Q9CY58-3;Q3V274;Q9CY58-4	Q9Z1P6
	Q8BLV3;Q8BLV3-2	P48774;E9PVM7;E9PV63	Q3UTJ2	Q3UTJ2	O08601;O08601-2;Q3UWK4	Q3UJ95;Q80XI4;Q91XU2	Q8BWR2;B1AV57;Q8BWR2-2	Q9CQQ8	B6YY24;Q3UVG3	B7ZW94;Q8C3F2;Q8C3F2-3;Q3V3X9	Q8BTX5;Q5M9L0;Q3TII2;Q91WK2;Q3THW7;Q3TIK5	Q9EQS3;Q3V1X1;Q8C5M8;A2A7K5	S4R2L4;B7ZNU2;S4R265;A2RTL5;S4R1M5	Q3TH46;Q3U111;P26043;Q7TSG6;Q8C2N4;Q05CE6	Q80U56	Q9EPK2-4	Q9QYI6	Q3UYN1;Q544R1;Q9Z2Y8;Q6P8V7	Q8R1N0;F8QZ85	Q9D820;Q9D820-2	A2ADR8;Q8R3G1	Q3TH46;Q3U111;P26043;Q7TSG6;Q8C2N4;Q05CE6	Q8R5L1;O35658	Q9EQS3;Q3V1X1;Q8C5M8;A2A7K5	Q3TCD4;Q9WUR2-2;Q9WUR2;E9PYC6;E9Q858;E9PUY9;E9PYA9;E9PVM6;E9Q7A8	B2RPS1;Q0PD56;P61021;Q8C458	Q91YL3	Q9CW46	P45952;Q91WS8	Q8K1L5	Q8K1Z0;F6SFF5	Q921W2;Q545C1;P70318;D6RGU1	Q6WVG3;Q69ZA6	B9EKE9;Q3TQX5;Q62167;B7ZWF1;B9EIA2;P16381	Q9DBL2;Q9DBL2-2	Q50HX4;Q50HX2;Q91V41;Q50HX0;Q50HX3;Q50HX1;A2AL34;Q50HW9	Q64471;Q9DCY6;D3Z3X5	Q68G54;Q9QYB2-2;Q9QYB2;Q3UTV2	Q8R1N0;F8QZ85	Q9CQQ8	Q9CXI0	Q99LB4;Q3UJ44;D3YTL5;Q3TNN6;P24452;D3YZN3;D3YU77	Q8K2F8
	P70704-2;A1L332;F6WYQ5;P70704-3;Q5DTG0;P70704;Q8CA15;Q52KQ7	P27046	Q9CRB6;Q1JPR8	Q3TLQ4;P58064	Q8K1E0;I1E4X1;Q8K1E0-2;H3BJE3;H3BKJ7;H3BJ02;H3BKP0	O08601;O08601-2;Q3UWK4	Q3TGU7;P50580;Q05BN2;Q3UMW2;D3YVH7	Q9D7E3	Q3U8S0;Q9DCR2	Q9CXL3	Q9Z0H8-2;Q9Z0H8;Q6A090	Q9Z0H8-2;Q9Z0H8;Q6A090	Q543K2;Q9WU84	Q4FZL1;Q5F2A7;P60843;Q3UXC2;Q3TGK7;Q3TFG3;Q3TLL6;Q3U8I0;Q78WR5	Q3U4S1;Q9WV80;Q3TI63	Q9QYI6	A2ASZ8-4;A2ASZ8-5;A2ASZ8-2;A2ASZ8-3;A2ASZ8	Q9CWI9;Q9CZI5;P62267;Q9CSN9;Q497E1	A2ADR8;Q8R3G1	Q8CIN4	Q58E65;Q3UI33;O08663;Q3TMN1	Q3TLE4;Q8BQ46;F6QCI0	P16882-2;Q920Z4;Q61652;Q3UP14;Q3UNY8;P16882	A2AEX8;A2AEX6;P97447;A2AEX7;A2AEY1;A2AEY2;P97447-2	Q60520;Q60520-1	Q8R121;Q8R121-2	Q102J0;Q8R242;Q8R242-2	Q566K0;P17095;Q3TE85	Q3TWW8	Q9EQU5-2;A2BE93;Q3T9S3;Q9EQU5;A2BE92;Q5U445	Q921W2;Q545C1;P70318;D6RGU1	Q5EAT0;P49962;Q3UIK3;D3YZX8	Q8BK37;Q5SWZ0;Q8R574;Q05BD4	Q9EQS3;Q3V1X1;Q8C5M8;A2A7K5	Q4FJX8;Q3UNP9;O35955	P24638;Q3UZN1;Q3U4F3	B2RXC1	Q8C2Q3;Q3U6A2;E9QL13;Q8C2Q3-2;Q62019	A2ADR8;Q8R3G1	P62627;A2AVR9	B9EKE9;Q3TQX5;Q62167;B7ZWF1;B9EIA2;P16381	Q9CQ92;G3X9U9	E9QAJ9;Q3UIA2;Q3UIA2-4;Q3UIA2-3;Q3UIA2-2
	P27046	P70704-2;A1L332;F6WYQ5;P70704-3;Q5DTG0;P70704;Q8CA15;Q52KQ7	Q9DBE7;A2A5S3;Q3TWP5;Q641P2;Q3TJ07;Q3UTC8;Q3TU43;Q3TWA1;Q3UKX3;A2A5R8;Q3U8D3;Q9Z108;V9GX87;Q3U7A6;Q6TNG5	Q9CPQ1	B7ZN52;F6TFN2	Q3TWV4;Q5FWI9;P84091;Q3TH69;Q6A0C9;Q3UCW9	Q8C0C7;E9PWY9;Q8BJG2;Q8BXN0;Q4FJQ2	Q059U9;Q9DBR0	Q9CQD1	Q5SWU9-2;Q5SWU9	Q9D287;Q05CL7;Q3U5M2	Q9D2U5-2;Q9D2U5	Q8K215	P97855;Q571F9;Q3UR88	D3Z6J0;Q6SKR2;Q6PRU9;Q4KMV5;E9PXT7	Q8C7K6	Q8VED9	Q3TX38;Q3TTN3;Q60931;J3QMG3	Q497K3;P62307;Q3UX80	Q6XLQ8;Q3TL33	P48193;A2A841;P48193-2;A2A842;A2AD32;B6ZHC8	Q3TUI3;Q8K2F0;Q05DR7;Q4G5Y4;Q5CCJ9;Q8K2F0-2;A2AKA9;Q53TY6	D3Z589;D3YU22;D3YU59;Q3UH68-3;Q3UH68;Q8CGB7;Q3UH68-2	P62627;A2AVR9	Q9Z0P5-2;Q9Z0P5	Q50HX4;Q50HX2;Q91V41;Q50HX0;Q50HX3;Q50HX1;A2AL34;Q50HW9	Q2M4G8;O35239	Q9WV03;Q05AF0	Q9R060	Q6XLQ8;Q3TL33	Q5EAT0;P49962;Q3UIK3;D3YZX8	Q6WVG3;Q69ZA6	Q3TF02;Q3TDF8;Q8BWY3;Q3TL10;Q3U6V5;P70199	Q61699;Q61699-2;E9Q0U7	O08797	Q3UKA4;P00329	Q8BP21;Q545C3;P30285;E9Q9E4;E9PZX7;Q9D193	Q8BFZ9	Q3TWW8	Q5FWB6;E9Q070;D3YVM5	P51859;E0CXA0	B9EKE9;Q3TQX5;Q62167;B7ZWF1;B9EIA2;P16381	Q91X83
	Q80Y14	A2AN37;P52623;F7CBX2	Q7TQH0-2;Q7TQH0-3;Q7TQH0;Q3TGG2;E9Q5Q0;Q3TYH7	Q059U9;Q9DBR0	Q8CI71;Q8CI71-2;Q8CI71-3;V9GXD1;Q9D9P9	B7ZN52;F6TFN2	Q61249	Q9EQS3;Q3V1X1;Q8C5M8;A2A7K5	Q91V01	B7ZP47;Q65Z40;F6YCH1	Q9EQS3;Q3V1X1;Q8C5M8;A2A7K5	Q9D287;Q05CL7;Q3U5M2	Q99KG5-3;Q99KG5-2;Q99KG5;D3YYU9	G3UYV7;Q059I1;P62858	Q4FK38;Q3UDJ2;Q8R0X7;Q69ZN1;D6REF7	B2RRX2;P63328-2;P63328;Q4V9X0;Q8C649	B2RRX2;P63328-2;P63328;Q4V9X0	Q9DAA6;Q9DAA6-2	Q6WVG3;Q69ZA6	Q5EAT0;P49962;Q3UIK3;D3YZX8	P62627;A2AVR9	E9QJV4;A0PJ46;Q8K2Z2	Q9WTP6-2;Q9WTP6	Q8BQ47;D3Z0T5	A0A068BIT8;P28063;G3UZW8	Q2M4G8;O35239	Q14BZ3;P70202	Q8BH95;F6T930	B9EKE9;Q3TQX5;Q62167;B7ZWF1;B9EIA2;P16381	Q99LB4;Q3UJ44;D3YTL5;Q3TNN6;P24452;D3YZN3;D3YU77	Q6WVG3;Q69ZA6	Q8K1Z0;F6SFF5	Q542K0;Q3U5I9;Q9R078	P62077	Q9D880	B2RXC1	Q50HX4;Q50HX2;Q91V41;Q50HX0;Q50HX3;Q50HX1;A2AL34;Q50HW9	G5E8R3;E9QPD7;Q3TCQ3;Q3T9S7;Q05920;Q3UFS6;Q62043;Q8BP54	B9EKE9;Q3TQX5;Q62167;B7ZWF1;B9EIA2;P16381	Q8K1L5	Q91VR5;Q922B8;Q3V1Z7	Q9CXI0	Q8VC72;Q5M9P5;Q8K3J1;Q3UY05
	Q5MJS3	Q80Y14	Q9CPQ1	Q2TPA8;Q9D015;Q99JH2;B1AX78	Q99KC8	Q80WQ2;Q8CCX6;Q8C907	Q9EQS3;Q3V1X1;Q8C5M8;A2A7K5	Q3TGU7;P50580;Q05BN2;Q3UMW2;D3YVH7	E9Q6R7	D3YVE8	Q5HZY7;Q9CR51;Q3U7E0	G3UYV7;Q059I1;P62858	E9Q394;E9Q474	Q3UIJ2;Q3TML6;Q9Z0N1;Q3UDF8;Q9CRE9;Q3U5H6;A2AAW9	Q8K0E2;Q6KAR6;Q8BIT7	Q544U7;Q9ERI2;Q549X4;Q4VA90;Q99P58;Q05D38	V9GX42;Q2VPQ9;Q2VPQ9-2	Q8BT60;Q3UJS6	Q8K0V4;Q6A015	P62627;A2AVR9	E9QJV4;A0PJ46;Q8K2Z2	Q5EAT0;P49962;Q3UIK3;D3YZX8	Q4FK54;P61290;A2A4J1	P97855;Q571F9;Q3UR88	Q3UGS9;Q3URM1;Q3U3U6;Q8CCN6;Q60649;Q3TXD4;E9PY58	Q102J0;Q8R242;Q8R242-2	B2RPS1;Q0PD56;P61021;Q8C458	Q3U741;Q501J6;Q3TU25;Q501J6-2	Q3UVI9;Q99LE6	Q5EAT0;P49962;Q3UIK3;D3YZX8	Q91VR5;Q922B8;Q3V1Z7	Q5FWB6;E9Q070;D3YVM5	Q3UNF2;P97470	E9Q7L3;D3Z1W6;E9Q7L2;D3Z1N4;E9Q4Y5;F8VQD1;Q8BSQ9-2;Q8BSQ9;D3YYF2;D6RIL0;D6RI94;D3Z3R4;F6THL5	Q4FJP2;Q3UJ82;O35309	D3Z6J0;Q6SKR2;Q6PRU9;Q4KMV5;E9PXT7	D3Z6J0;Q6SKR2;Q6PRU9;Q4KMV5;E9PXT7	Q4VAE8;Q9CQC7;Q9DBH2	Q9Z0U1	B9EKE9;Q3TQX5;Q62167;B7ZWF1;B9EIA2;P16381	Q99LB4;Q3UJ44;D3YTL5;Q3TNN6;P24452;D3YZN3;D3YU77	P62627;A2AVR9	Q78IK4;Q9CZB4;B1AV14
	A2AN37;P52623;F7CBX2	Q5MJS3	Q2TPA8;Q9D015;Q99JH2;B1AX78	B3V097;Q8BIQ5;Q8BIQ5-2;A2AEK1;B3V099	P00920	Q8K265;Q4VBE8	Q9D881;P19536	Q61655	G5E8J9;Q8CFE4	O08601;O08601-2;Q3UWK4	G3UYV7;Q059I1;P62858	Q3UTJ2	Q3U4S1;Q9WV80;Q3TI63	Q6PDL0	Q80TB8;Q8BL94	Q9D023;Q8BWL4;E9PY67;Q925J5;Q925J4	Q9JJQ6;Q3TLS9;Q8CCG9;Q00558	Q9CWK0;Q9CR57	Q9JJF0;Q9CTE1	Q3UD26;O35593;Q9CSU2	Q5EAT0;P49962;Q3UIK3;D3YZX8	Q3UQB4;A2BFB1;Q8K0H8;A2BFB0;O08609-3;O08609;A2BFB2;O08609-2	Q9EQU5-2;A2BE93;Q3T9S3;Q9EQU5;A2BE92;Q5U445	Q00PI9	O08797	Q14BZ3;P70202	Q50HX4;Q50HX2;Q91V41;Q50HX0;Q50HX3;Q50HX1;A2AL34;Q50HW9	Q9CPP6;Q9CX78	Q9Z0U1	Q61171;Q5M9N9;D3Z4A4	D3Z4U0;B2RRT9;D3Z4T9;Q9R020;E9PUD0	Q61171;Q5M9N9;D3Z4A4	Q3UQB4;A2BFB1;Q8K0H8;A2BFB0;O08609-3;O08609;A2BFB2;O08609-2	A2ADR8;Q8R3G1	Q3U186	Q8BP21;Q545C3;P30285;E9Q9E4;E9PZX7;Q9D193	Q3UKA4;P00329	Q91XU0;Q91XU0-2	Q544T5;P00375	B7ZCL8;Q542P4;P70290;Q684Q6;A2AN84;B7ZCL9	Q8C1B7-3;Q8C1B7-2;Q8C1B7	P97868-2;P97868	Q3U5F4
	Q8BP01	Q8CG03;Q8BJ62	Q059U9;Q9DBR0	Q9CRB6;Q1JPR8	Q3TEF1;P97494;Q3UNA7	Q8VI75;Q5U4C5	Q8C1B7-3;Q8C1B7-2;Q8C1B7	Q8C0C7;E9PWY9;Q8BJG2;Q8BXN0;Q4FJQ2	Q9CQW1	Q8BU20;Q9CQH3;D3Z568;F6Y6V5;D3YX99;D3Z6W9	Q9D7X8	Q9CPQ1	Q6P1F1;E9Q6B6;E9Q6E0;Q8CHB5;Q6NV54;Q3UHB5;J3QNR6;K3W4S4;Q9ESN9-2;Q9ESN9-3;Q9ESN9-5;Q9ESN9-4;Q9ESN9;Q9ESN9-6	Q6WVG3;Q69ZA6	Q91X78	Q9CR61	Q60770;Q60770-2	Q6ZWQ5;Q3TGS7;Q3V2H3;Q99M52;O70493	Q4VA29;Q9CQE8;J3QNB0	Q6PEM5;Q5D0B0;Q6ZY49;Q52KI7;Q3TL96;Q8K295;P55302;Q6PB52;Q8C252	Q1WIL9;E9PYN1;Q8R5M8-4;Q8R5M8-3;Q8R5M8-2;Q8R5M8;Q8R5M8-7;Q8R5M8-6;E0CY16;Q8R5M8-5;Q9QYL3;Q9QYL4	P62627;A2AVR9	Q9WUB4;D3Z6H3;D3Z4E5	Q8CIN4	Q2M4G8;O35239	Q6PAJ1;A2RRK7	Q6PAJ1;A2RRK7	Q569Y6;Q9CZY3;B7ZBY7;E9PY39;Q9CZY3-2	Q9D0R8	B9EKE9;Q3TQX5;Q62167;B7ZWF1;B9EIA2;P16381	Q8CIN4	Q8CIN4	Q00PI9	Q5EAT0;P49962;Q3UIK3;D3YZX8	A9E3L2;Q9Z2I2;Q80YE1;Q810R7	Q6PAC1;P13020-2;Q3UCW8;P13020;Q3U9Q8;Q3TGJ9	Q6PAC1;P13020-2;Q3UCW8;P13020;Q3U9Q8;Q3TGJ9	P58281-2;H7BX01;P58281;Q80TX7;E0CXD1	Q9CRA5;Q3UWP6;Q3TIL4;Q05BZ0	Q8K1Z0;F6SFF5	P62627;A2AVR9	Q8K4Z5;Q3TVM1	Q91WD5;D3YXT0;F6RJ83
	Q8CG03;Q8BJ62	Q8BH01-3;Q8BH01-2;Q8BH01	Q99JP4	A2AWN8;P59326;Q3TH60	Q148W0	Q60936;F7B1B6;Q60936-2	Q61655	Q9WVA4	Q9JM62;Q9JM62-2	F6RJV6;Q9JJK2	Q61249	Q61249	Q3UW32;Q9EST5;Q9EST5-2	Q9WTX8;Q9WTX8-2	Q9CZS7;Q544E3;O70172;F6RJE8	Q6NSU3;Q7TNU1;Q6NSU3-2	Q6PEV3;D3Z0K7	Q9D1A2;Q3TG71;Q6KAT3	E9Q7L3;D3Z1W6;E9Q7L2;D3Z1N4;E9Q4Y5;F8VQD1;Q8BSQ9-2;Q8BSQ9;D3YYF2;D6RIL0;D6RI94;D3Z3R4;F6THL5	P51859;E0CXA0	Q3TVW1;Q8R1X6;D3Z3F8;Q8R1X6-2	A2ADR8;Q8R3G1	Q7TT04;Q3UJY4;P59235;Q3URN3	Q61171;Q5M9N9;D3Z4A4	Q9Z2C9;G3V027;I6L9A6;G3UYB7;G3UYZ2	Q64471;Q9DCY6;D3Z3X5	Q3UCY7;Q3TWN7;Q571E2;Q9R1Q9;Q3TT23;Q3THZ3;Q3UWN7;Q3TKX1	Q3UJB0;Q3UAI4;Q80W39;Q3UBH2;Q3UQU5;Q8BL33	Q99LX5	A0MNP4;Q9ERF3;Q8BVQ0;D6RDC7	Q5FWB6;E9Q070;D3YVM5	A2A5N2;Q9CQV8;A2A5N1	Q5EAT0;P49962;Q3UIK3;D3YZX8	A0MNP4;Q9ERF3;Q8BVQ0;D6RDC7	Q8K064	A9E3L2;Q9Z2I2;Q80YE1;Q810R7	A9E3L2;Q9Z2I2;Q80YE1;Q810R7	Q8BTI8-3;Q8BTI8;Q8BTI8-2	Q8C1W2;E9QAC6	Q9EQU5-2;A2BE93;Q3T9S3;Q9EQU5;A2BE92;Q5U445	Q8K4Z5;Q3TVM1	Q6XLQ8;Q3TL33	Q9DCT2
	P11352	Q99KC8	A2AWN8;P59326;Q3TH60	Q9DBE7;A2A5S3;Q3TWP5;Q641P2;Q3TJ07;Q3UTC8;Q3TU43;Q3TWA1;Q3UKX3;A2A5R8;Q3U8D3;Q9Z108;V9GX87;Q3U7A6;Q6TNG5	Q8R1G2	Q3TWN8;Q9Z110-2;Q9Z110;Q3UGW8;Q3UZ27	Q5BLK0;P35979;Q8C2K0;Q3TIQ2	Q5SW18;P63005;Q3UH92;Q3UGR6;Q3TJG1;Q3UHM0;P63005-2;Q3TIK0	Q9D0R2;Q3U630	B6YY24;Q3UVG3	Q9CPQ1	O70194	Q3UKA4;P00329	Q4VA29;Q9CQE8;J3QNB0	Q91W86;Q8C027	Q8BKR5;Q8R3Q5	Q5SW83;P61161;Q8BMA4	O08553	Q922H4;Q3UNC0	Q3TPU5;O70378;Q8C988;Q3TTC9;M0QWY0;M0QWP2	Q3TUI3;Q8K2F0;Q05DR7;Q4G5Y4;Q5CCJ9;Q8K2F0-2;A2AKA9;Q53TY6	P97868-2;P97868	Q9R060	Q3TVW1;Q8R1X6;D3Z3F8;Q8R1X6-2	A9E3L2;Q9Z2I2;Q80YE1;Q810R7	Q3UCY7;Q3TWN7;Q571E2;Q9R1Q9;Q3TT23;Q3THZ3;Q3UWN7;Q3TKX1	Q64471;Q9DCY6;D3Z3X5	P50396	Q99LP6;Q3UTB8	Q8K4Z5;Q3TVM1	A2A5N2;Q9CQV8;A2A5N1	D3Z4U0;B2RRT9;D3Z4T9;Q9R020;E9PUD0	F6ZDS4	Q61171;Q5M9N9;D3Z4A4	Q3TCD4;Q9WUR2-2;Q9WUR2;E9PYC6;E9Q858;E9PUY9;E9PYA9;E9PVM6;E9Q7A8	A2AKH7;Q8JZX5;Q9CSK4;Q9D1G5	B7ZP20	I1E4X7;Q9JI46;H3BLR8;B2KF67	Q0VDQ3;Q9D733;Q9D6X7	Q8C1B7-3;Q8C1B7-2;Q8C1B7	P99028	Q91VR5;Q922B8;Q3V1Z7	Q3UGS9;Q3URM1;Q3U3U6;Q8CCN6;Q60649;Q3TXD4;E9PY58
	Q9EQT6	Q8BP01	Q9QZ83	Q7TQH0-2;Q7TQH0-3;Q7TQH0;Q3TGG2;E9Q5Q0;Q3TYH7	A2AFQ0;Q7TMY8;Q4JG03;Q7TMY8-4;Q7TMY8-2	Q53WR6;Q61543;F8WHM5	Q5SW18;P63005;Q3UH92;Q3UGR6;Q3TJG1;Q3UHM0;P63005-2;Q3TIK0	Q61249	Q5SWU9-2;Q5SWU9	Q4FJL0;P61027;Q3U621	Q9CSS1;E9PZM7;Q6ZPE9;Q7TML8	Q9DC23	Q91WG2;Q91WG2-2;Q91WG2-1;Q3TZJ2	Q61206;Q8BTA2	Q61037-6;Q61037-7;Q61037-4;Q61037-5;Q61037;Q61037-2;Q3TBX9;Q3UG84	P52503	Q78IK4;Q9CZB4;B1AV14	Q3URS8;Q3UNV7;Q99KX1	Q8BQ47;D3Z0T5	Q99LX5	Q540P4;Q9EPC5;F6R1Y3	Q3TTF6;H3BKU1;Q8BIX1;G3UWS4;Q7TNP2;H3BLQ0;H3BLE7;H3BIV7	Q9DCY1;P24369	F7BJK1;Q2TJI9	Q6P6M7;Q3U597	P10649;A2AE89	Q8K3X4	Q3TVP0;P17095-1	Q544T5;P00375	Q9CXI0	Q61171;Q5M9N9;D3Z4A4	Q91VR5;Q922B8;Q3V1Z7	Q7TMY4;Q7TMY4-2	Q8K4Z5;Q3TVM1	Q9JJV1	B7ZP20	A2AKH7;Q8JZX5;Q9CSK4;Q9D1G5	Q5FWX7;Z4YJX3;Q8VDM5;Q8R0G3;E9Q6C1;F6UHR6;E9PXZ2;A2A8Z1-2;A2A8Z1	Q9WTP6-2;Q9WTP6	Q9CQ92;G3X9U9	P11031	Q8C1B7-3;Q8C1B7-2;Q8C1B7	Q3UNZ8;Q3UNZ8-2
	Q571E4;Q8CC47	O35153;I6L979	Q3UD26;O35593;Q9CSU2	O88712-2;O88712;O88712-3	Q8VI75;Q5U4C5	B1AZ42;B1AZ39;P0C0A3;B1AZ41;Q3TS10	Q9CQQ8	Q8C1B7-3;Q8C1B7-2;Q8C1B7	A2AKI5;P43406;Q3U4C8	Q3V100;Q924M7	Q80XC2	Q8CAJ7;Q3U3I6;Q3TVK3;Q9Z2W0;Q8BPW9	Q9DBU8;Q9JKC8;H7BWY2	Q8BK29;B1AT82;Q9D0M1;B1AT83	Q5SW83;P61161;Q8BMA4	Q60770;Q60770-2;Q45Z54;E9Q6R9	Q3UD98;Q91VU6;Q3TYA0;D3Z4U8;Q91VU6-2;D6RCG5;D3YVR5;D3Z2V1	Q9DCC4	Q8C1W2;E9QAC6	Q5F258;Q68FF6	E9Q7L3;D3Z1W6;E9Q7L2;D3Z1N4;E9Q4Y5;F8VQD1;Q8BSQ9-2;Q8BSQ9;D3YYF2;D6RIL0;D6RI94;D3Z3R4;F6THL5	Q1WIL9;E9PYN1;Q8R5M8-4;Q8R5M8-3;Q8R5M8-2;Q8R5M8;Q8R5M8-7;Q8R5M8-6;E0CY16;Q8R5M8-5;Q9QYL3;Q9QYL4	Q9CWZ3-2;A0A023T672;Q9CWZ3	B9EKE9;Q3TQX5;Q62167;B7ZWF1;B9EIA2;P16381	Q50HX4;Q50HX2;Q91V41;Q50HX0;Q50HX3;Q50HX1;A2AL34;Q50HW9	Q8K3X4	P10649;A2AE89	Q3TH57;Q8CGF7-2;Q8CGF7;Q8CGF7-3	Q8K1L5	B7ZCL8;Q542P4;P70290;Q684Q6;A2AN84;B7ZCL9	B9EKE9;Q3TQX5;Q62167;B7ZWF1;B9EIA2;P16381	Q9R060	P49586	O54988	Q8R0F3;E9Q265;E9Q0Z7	B2RPS1;Q0PD56;P61021;Q8C458	B2RPS1;Q0PD56;P61021;Q8C458	E9Q4M4;Q91VN4;Q9DA45;Q3TJS8;Q8C2Z6	Q9CQ92;G3X9U9	Q9CXI0	P97868-2;P97868	Q00PI9	Q543N3;Q61792;A2A6H0;A2A6G9;A2A6G7;A2A6G8;A2A6G6
	Q8BH01-3;Q8BH01-2;Q8BH01	Q91W34;D6RDS0;Q91W34-2	Q542K0;Q3U5I9;Q9R078	Q3UD26;O35593;Q9CSU2	Q80WQ2;Q8CCX6;Q8C907	Q921G7;Q6PF96	Q9WVA4	Z4YJU8;Q5DTL1;E9PUQ5;Q921M4-2;Q921M4	D3YVE8	Q923F9;E9QPX3;Q9CXZ1;Q9CTT4	D3Z1F6;B9EK90;Q8VDU5	Q1HFZ0;H3BKN0;Q1HFZ0-2	P49442	Q8BGD8	Q9ME04;Q7JCY6;P03911;W0TGY1;F1JVR2;A9UIX0;Q3UQ59;A0A075DCI1	Q3U4S1;Q9WV80;Q3TI63	Q6NSU3	Q9ERS2	H3BKM2;Q3TI64;Q80YV2;D3Z3D0;Q80YV2-2	Q3UMP2;P38060	Q8CIN4	Q3TVW1;Q8R1X6;D3Z3F8;Q8R1X6-2	Q545R3;Q3TSR4;B7ZWC0;Q62433;Q3TD08	Q3TUF3;O35887;Q3UG11;Q3TQD1;G3UWV3;G3UWR0;G3UY49	Q4V9W8;Q91ZR1;Q3USC3	Q3TXR9;P20060	B2RXC1	P12787	Q9CQ92;G3X9U9	Q9CXW4;E9PYL9;Q8VC94;A2BH06	Q9CQ92;G3X9U9	B9EKE9;Q3TQX5;Q62167;B7ZWF1;B9EIA2;P16381	Q3U0D7;P62331	Q3UIJ2;Q3TML6;Q9Z0N1;Q3UDF8;Q9CRE9;Q3U5H6;A2AAW9	Q9CPS6;F8WH96	Q14BZ3;P70202	Q14BZ3;P70202	Q58E49;O09106;D3YYI8	Q8BP60;Q99JX7;V9GXF3;V9GXW3	Q9CY58;Q3UJK2;Q9CY58-2;Q3UMP4;Q3UEI6;Q9CY58-3;Q3V274;Q9CY58-4	Q6XLQ8;Q3TL33	P11031	Q4FJQ8;Q3UAX2;Q8C562;Q3UC81;Q3UB98;Q3UB54;Q3U841;Q3U784;Q3U5U0;P11152;Q3UCZ2;Q3UCD4;Q3UC44;Q3UBE9;Q3U715;Q3UCH4;Q3U6S8
	O35153;I6L979	Q9ER72;Q3UXN3	Q3THQ5;Q60864	E9Q983;Q8K4L2;E9Q3Z5;Q8K4L3;E3VVQ8	Q99KI3	Q148W0	Q8R344	Q5BLK0;P35979;Q8C2K0;Q3TIQ2	Q3ZAW0;Q104P0;B7ZP48;O35659	Q6PHU5;Q6PHU5-2	Q3UHW2;Q3TT11;P51660	P32020;P32020-2	Q9QUP5	Q059U9;Q9DBR0	A6H630-2;A6H630;A6H630-4;A6H630-3	A2AKH7;Q8JZX5;Q9CSK4;Q9D1G5;Q9CTX7;B0R031	P08752	Q3V235;O35129;F6QPR1	P51859;E0CXA0	Q3UQB4;A2BFB1;Q8K0H8;A2BFB0;O08609-3;O08609;A2BFB2;O08609-2	P97868-2;P97868	Q540P4;Q9EPC5;F6R1Y3	Q9CXW2	Q5EAT0;P49962;Q3UIK3;D3YZX8	Q52L66;Q91W67	Q64521;A2AQR0	Q3TXR9;P20060	Q99LX0;A2A813;A2A815	Q4VA29;Q9CQE8;J3QNB0	A2ADR8;Q8R3G1	Q9R060	Q4VA29;Q9CQE8;J3QNB0	Q9R060	Q9CY58;Q3UJK2;Q9CY58-2;Q3UMP4;Q3UEI6;Q9CY58-3;Q3V274;Q9CY58-4	Q8R121;Q8R121-2	Q99K01-2	Q9CZS7;Q544E3;O70172;F6RJE8	Q3TLU0	Q99LB4;Q3UJ44;D3YTL5;Q3TNN6;P24452;D3YZN3;D3YU77	Q7TT04;Q3UJY4;P59235;Q3URN3	Q00PI9	P99028	Q3UZV3;Q547J8;Q3TT48;P21661;Q3TYM6
	Q99KC8	P11352	Q3UIJ2;Q3TML6;Q9Z0N1;Q3UDF8;Q9CRE9;Q3U5H6;A2AAW9	P54775;Q569X4;Q3TFA5;Q8BKU2;Q3TJ97;Q3UBF0;Q52L53	Q6PD19;Q6PD19-2	G3X8R5;Q3UA37;Q922W2	Q4FZE6;P62082;F6SVV1	Q4FZE6;P62082;F6SVV1	Q99J39;Q99J39-2;Q569V6	Q64735-2;Q64735;Q62479	Q61935;A0A087WRZ7;Q545G5;E9PWG4;Q6PCW9;Q545T7;P05977-2;P05977;P09542	Q8BJF9	Q91XU3	D3Z589;D3YU22;D3YU59;Q3UH68-3;Q3UH68;Q8CGB7;Q3UH68-2	Q7TMK6;Q3UWV9;Q3TKK8	V9GX42;Q2VPQ9;Q2VPQ9-2;V9GXH6;B1ASC8	Q8BME2;Q7TMF3	G5E8R3;E9QPD7;Q3TCQ3;Q3T9S7;Q05920;Q3UFS6;Q62043;Q8BP54	Q3UMP2;P38060	Q8BQ47;D3Z0T5	Q8K4Z5;Q3TVM1	E9Q7L3;D3Z1W6;E9Q7L2;D3Z1N4;E9Q4Y5;F8VQD1;Q8BSQ9-2;Q8BSQ9;D3YYF2;D6RIL0;D6RI94;D3Z3R4;F6THL5	Q3TF02;Q3TDF8;Q8BWY3;Q3TL10;Q3U6V5;P70199	Q9DBE7;A2A5S3;Q3TWP5;Q641P2;Q3TJ07;Q3UTC8;Q3TU43;Q3TWA1;Q3UKX3;A2A5R8;Q3U8D3;Q9Z108;V9GX87;Q3U7A6;Q6TNG5	Q99K01-2	B2RXC1	Q64521;A2AQR0	Q99JF8;A2BI12;Q99JF8-2;Q05CD2	Q8BFR5;D3YVN7;Q8BFR5-2	Q3UD26;O35593;Q9CSU2	Q3TVW1;Q8R1X6;D3Z3F8;Q8R1X6-2	Q3TVW1;Q8R1X6;D3Z3F8;Q8R1X6-2	A2RRK3;O54988-2	Q9CQ92;G3X9U9	O08847;P08775	Q6PAJ1;A2RRK7	Q3U186	Q9WV03;Q05AF0	Q99LX5	P68040	Q8CIN4	Q8CIN4	A2AQW0
	Q91W34;D6RDS0;Q91W34-2	Q5I012-3;J3QNE8;Q5I012;Q99JV6;Q7TMR2	Q3TLQ4;P58064	Q9D0B6;Q9D0B6-2	Q53WR6;Q61543;F8WHM5	D3YVE8	Q5SU48;Q7TN98-4;Q7TN98-5;Q7TN98-3;Q7TN98-2;Q7TN98;Q5SU47;Q9D5G2;Q9D5F3;F6T0J8;A1A562;D3YUJ4;E9Q5X2;E9Q969;Q812E0	Q8R344	Q3TMH3;Q3TEZ2;Q99ME2;Q8R539	G5E8J3;Q8K1X1	Q9DC23	Q9CSS1;E9PZM7;Q6ZPE9;Q7TML8	Q6ZWY7;Q9WU28;E9PVG3;E9PZ62	Q1HFZ0;H3BKN0;Q1HFZ0-2	Q60770;Q60770-2	Q8BME2;Q7TMF3	Q9CRB9;Q91VG6	Q3UGC8;Q91ZA3	P42128	Q60951;Q3UBT1;P62960;Q71V06;Q810K5;Q60950	Q3UQB4;A2BFB1;Q8K0H8;A2BFB0;O08609-3;O08609;A2BFB2;O08609-2	Q9CXW2	Q9CXW4;E9PYL9;Q8VC94;A2BH06	Q8VDP4	P24638;Q3UZN1;Q3U4F3	A9E3L2;Q9Z2I2;Q80YE1;Q810R7	A9E3L2;Q9Z2I2;Q80YE1;Q810R7	Q8R1S0;D3YW66	A6H663;Q9JLV1;Q3TAM9	Q7TT04;Q3UJY4;P59235;Q3URN3	Q4VA29;Q9CQE8;J3QNB0	Q9EQU5-2;A2BE93;Q3T9S3;Q9EQU5;A2BE92;Q5U445	Q8K1L5	Q5FWB6;E9Q070;D3YVM5	P70303;P70303-2;P70303-3	Q3U186	Q99K01-2	Q8VE92	E9Q7L3;D3Z1W6;E9Q7L2;D3Z1N4;E9Q4Y5;F8VQD1;Q8BSQ9-2;Q8BSQ9;D3YYF2;D6RIL0;D6RI94;D3Z3R4;F6THL5	Q8K4Z5;Q3TVM1	P68040	Q5FWB6;E9Q070;D3YVM5	Q8BK30
	Q8R121;Q8R121-2	Q9EQT6	Q9DC07	Q3UIJ2;Q3TML6;Q9Z0N1;Q3UDF8;Q9CRE9;Q3U5H6;A2AAW9	Q9CXL3	Q8R1G2	Z4YJU8;Q5DTL1;E9PUQ5;Q921M4-2;Q921M4	E9PV44;O35143	Q3UGC5;Q3TNR7;P59017	Q80WQ2;Q8CCX6;Q8C907	Q5SWJ8;P60060;G3UWH0	P99028	Q3U054;Q9D153;Q60772	A2RRK3;O54988-2	Q3V117;Q91V92;Q3TED3;Q3UEA1	Q6PAJ1;A2RRK7;Q61223;Q80UP7	Q8C7K6	Q3V424;P62309	A6H663;Q9JLV1;Q3TAM9	Q3TH46;Q3U111;P26043;Q7TSG6;Q8C2N4;Q05CE6	Q9CXW2	Q8CIN4	Q8BK29;B1AT82;Q9D0M1;B1AT83	Q3U647;Q60967;Q6NZM8;Q3TUA8	B2RUS7;Q8BNE2;Q6PGE2;Q9Z2P1	B7ZP20	P47867	Q99LC5	E9Q7L3;D3Z1W6;E9Q7L2;D3Z1N4;E9Q4Y5;F8VQD1;Q8BSQ9-2;Q8BSQ9;D3YYF2;D6RIL0;D6RI94;D3Z3R4;F6THL5	Q9CQQ8	P62077	Q9CQ92;G3X9U9	Q9CQK7	Q8CIN4	P06745;B7ZWL9	Q9CZS7;Q544E3;O70172;F6RJE8	Q6PAJ1;A2RRK7	Q9ERS2	E0CY91;E0CYW1;E0CY38;E9QJZ1;E0CZB3;Q9EPV8	D3Z4U0;B2RRT9;D3Z4T9;Q9R020;E9PUD0	Q5FWB6;E9Q070;D3YVM5	Q5EAT0;P49962;Q3UIK3;D3YZX8	Q3UM57;Q6ZQ73
	Q9ER72;Q3UXN3	Q9CZS7;Q544E3;O70172;F6RJE8	Q5NCJ9;Q8R1I1	Q8C2Q8;Q9D9D7;Q3UD06;Q91VR2;A2AKU9;Q9ERA8;A2AKV2;A2AKV3;A2AKV1	Q921G7;Q6PF96	Q8CI71;Q8CI71-2;Q8CI71-3;V9GXD1;Q9D9P9	E9PV44;O35143	Q5SU48;Q7TN98-4;Q7TN98-5;Q7TN98-3;Q7TN98-2;Q7TN98;Q5SU47;Q9D5G2;Q9D5F3;F6T0J8;A1A562;D3YUJ4;E9Q5X2;E9Q969;Q812E0	Q80TB8;Q8BL94	O54781;Q8CBI1;Q8C9R8	P54775;Q569X4;Q3TFA5;Q8BKU2;Q3TJ97;Q3UBF0;Q52L53	Q7TQE2;Q8CBM0;Q3TCR9;Q62523;Q8CD55	Q4FK85;Q3U607;A0A087WQT6;O89110	Q6ZWQ6;P61087;Q3TL77;D3Z4U3	O08579;Q3THM8;I7HJS1;B7FAU5	Q91YT8;E0CX44;E0CXM3	Q9R226	Q58E49;O09106;D3YYI8	Q3TPC7;Q3TGP3;O35386	Q9DCJ1	Q3TTF6;H3BKU1;Q8BIX1;G3UWS4;Q7TNP2;H3BLQ0;H3BLE7;H3BIV7	Q8K4Z5;Q3TVM1	Q8BQ47;D3Z0T5	Q8K4Z5;Q3TVM1	B7ZP20	Q9CQ54;Q9D846	Q9CQ54;Q9D846	Q542X7;P80314;Q9JJD8	P11031	Q9R060	Q9WTP6-2;Q9WTP6	Q9WTP6-2;Q9WTP6	Q99LL5;E9QAL6;Q9CTC0;Q9CSK2;Q8BW04	Q921W2;Q545C1;P70318;D6RGU1	D3Z6J0;Q6SKR2;Q6PRU9;Q4KMV5;E9PXT7	Q64521;A2AQR0	Q64521;A2AQR0	Q3V235;O35129;F6QPR1	P51859;E0CXA0	Q5EAT0;P49962;Q3UIK3;D3YZX8	Q5EAT0;P49962;Q3UIK3;D3YZX8	Q6WVG3;Q69ZA6	Q99LY9;B1ARW4
	Q9CZS7;Q544E3;O70172;F6RJE8	Q571E4;Q8CC47	Q8C2Q8;Q9D9D7;Q3UD06;Q91VR2;A2AKU9;Q9ERA8;A2AKV2;A2AKV3;A2AKV1	Q542K0;Q3U5I9;Q9R078	Q06138	P60766;Q3UL78	Q921W4;D3YZD6;D3Z6I4;Q921W4-2;D3YU21;F7BGV1	Q9D2U5-2;Q9D2U5	Q8K1E0;I1E4X1;Q8K1E0-2;H3BJE3;H3BKJ7;H3BJ02;H3BKP0	Q6ZQ84;Q9JLV5;E9Q4T8	Q9ER73;A2A414	Q91V55;P97461;D3YYM6	Q9CYW4	A2AWN8;P59326;Q3TH60	B2RXR2;Q8VD65;B2RY05	P08752;Q8JZT4;Q922Y6	Q9D023	Q3U9R7;Q3UB84;P47791-2;P47791;Q3UAS7;Q3TXK9;Q3TWI5;Q91Z57	Q6GTY5;Q8BMX2;Q9EPR2-2;Q9EPR2	Q8C1B7-3;Q8C1B7-2;Q8C1B7	Q6P1B6;Q6NZN9;Q8BH69	Q6P1B6;Q6NZN9;Q8BH69	Q3UCD9;Q3U7P0;Q3TWR6;Q3TWD0;P18242;Q3U8W5;Q3U651;Q3TJN3;Q8C243;Q3TWL1;Q3U7I9;Q3UCW4;Q3TXL5;Q3UC89;Q3TIR0;Q3UAQ1;Q8VCK2;F8WIR1	Q3UK83;Q3U7F3;Q3TIK8;Q5EBP8;P49312;Q3TFB1;P49312-2	P70303;P70303-2;P70303-3	P47867	B7ZP20	Q8CAQ8-2;Q3TVZ5;Q3TQL4;Q3U7N2	Q99LB4;Q3UJ44;D3YTL5;Q3TNN6;P24452;D3YZN3;D3YU77	Q9CQ92;G3X9U9	Q1WIL9;E9PYN1;Q8R5M8-4;Q8R5M8-3;Q8R5M8-2;Q8R5M8;Q8R5M8-7;Q8R5M8-6;E0CY16;Q8R5M8-5;Q9QYL3;Q9QYL4	E9QJV4;A0PJ46;Q8K2Z2	P48193;A2A841;P48193-2;A2A842;A2AD32;B6ZHC8	P68040	P42232	Q3UM57;Q6ZQ73	Q6NSU3	Q3UK24;Q8CBE3	D3Z4U0;B2RRT9;D3Z4T9;Q9R020;E9PUD0	Q61171;Q5M9N9;D3Z4A4	Q6WVG3;Q69ZA6	P68040	Q9D1E6
	Q5I012-3;J3QNE8;Q5I012;Q99JV6;Q7TMR2	Q8R121;Q8R121-2	Q9D0B6;Q9D0B6-2	Q99JP4	Q9ER72;Q3UXN3	Q6PD19;Q6PD19-2	Q9D2U5-2;Q9D2U5	Q921W4;D3YZD6;D3Z6I4;Q921W4-2;D3YU21;F7BGV1	Q64735-2;Q64735;Q62479	Q9D0R2;Q3U630	Q3TGU7;P50580;Q05BN2;Q3UMW2;D3YVH7	Q9D7X8	P15105	Q3TET1;Q3UI47;B1AQZ2;P28741;Q80UK1;Q3TSP1;Q3TTS7;Q8CGJ1	Q8VDQ8;Q8VDQ8-2;Q3UJK6;Q8VDQ8-3;Q8VDQ8-4	P48036	Q5XKN4	Q496X5;Q3UW05;P10601	O88809;Q6PGI2;Q8C852;Q3V349;Q9CXL6	Q3UCW0;Q61187;Q3UK08	Q8C1B7-3;Q8C1B7-2;Q8C1B7	Q5F258;Q68FF6	Q6HAA1;Q00422;Q91YY8;Q6WJ14	Q6PDL0	Q8R0F3;E9Q265;E9Q0Z7	Q3UKA4;P00329	Q3UKA4;P00329	Q91V47;Q3UK94;Q684Q9;P21126;B2M0S0;B2M0R9	Q8C1B7-3;Q8C1B7-2;Q8C1B7	Q3TPU5;O70378;Q8C988;Q3TTC9;M0QWY0;M0QWP2	Q80Y09	Q3UD26;O35593;Q9CSU2	P70288;Q8BQ10;Q3UXH8	Q6WVG3;Q69ZA6	Q61037-6;Q61037-7;Q61037-4;Q61037-5;Q61037;Q61037-2;Q3TBX9;Q3UG84	Q3TXR9;P20060	Q3UM57;Q6ZQ73	Q3U484;Q62095	Q4VA29;Q9CQE8;J3QNB0	Q9CXW4;E9PYL9;Q8VC94;A2BH06	A2ADR8;Q8R3G1	Q9EQU5-2;A2BE93;Q3T9S3;Q9EQU5;A2BE92;Q5U445	B2RRX2;P63328-2;P63328;Q4V9X0
	P52479;P52479-2	Q3U487	O70251;A0A087WS46	G3UYV7;Q059I1;P62858	Q6NZR5;Q3TW36;Q8CDP6;O70349;Q8R3X0;Q3TE28	Q99KC8	Q8R404	Q3UIA1;P19426-2;P19426;G3UY39	Q3UZP4	Q9JM62;Q9JM62-2	Q1HFZ0;H3BKN0;Q1HFZ0-2	Q9CQQ8	Q9CY64	F7BJK1;Q2TJI9	P06745;B7ZWL9	Q80W12;Q3TJ75;O08848;Q8R562	Q9QXE7	B1AWE0;Q6PFA2;B1AWE1;B1AWD8;B1AWD9;O08585;Q3THU7	Q3TWW8	Q99JT9;F7ARY2	Q5F258;Q68FF6	Q8C1B7-3;Q8C1B7-2;Q8C1B7	Q5EAT0;P49962;Q3UIK3;D3YZX8	Q6WVG3;Q69ZA6	Q8BTS3	Q5SW83;P61161;Q8BMA4	Q5SW83;P61161;Q8BMA4	Q9WVJ3-2;Q9WVJ3;Q3U496	Q0VDQ3;Q9D733;Q9D6X7	A6H663;Q9JLV1;Q3TAM9	Q3UD26;O35593;Q9CSU2	Q9CXW4;E9PYL9;Q8VC94;A2BH06	B9EKE9;Q3TQX5;Q62167;B7ZWF1;B9EIA2;P16381	E9Q1G8;Q8C2A3;E9Q9F5;O55131;Q3UNN1;Q5DTS3	Q60710;F8WJE0;Q8C5C0;E9PYG9;Q3UDX7	Q8C4G3;Q8C288;Q505G9;A2AQC3;Q6DI68;O70228	Q8C4G3;Q8C288;Q505G9;A2AQC3;Q6DI68;O70228	P67778;Q5SQG5;Q3TV00	Q9JJF0;Q9CTE1	P99028	Q9R0H0-2;Q9R0H0;A2A848;Q8C168;Q8BW35	Q61171;Q5M9N9;D3Z4A4	Q9JJV1
	Q9CYW4	P52479;P52479-2	P54775;Q569X4;Q3TFA5;Q8BKU2;Q3TJ97;Q3UBF0;Q52L53	G3UVU2;Q7TN25;D3YW09;Q62203	B7ZW94;Q8C3F2;Q8C3F2-3;Q3V3X9	A2AFQ0;Q7TMY8;Q4JG03;Q7TMY8-4;Q7TMY8-2	A0A087WNP6;Q4VAA2-2;Q4VAA2;A0A087WRM0	Q3UE99;A2RTI3;O89017	Q8BZS9-2	Q8K4P0	Q3UE99;A2RTI3;O89017	Q9ER73;A2A414	Q542H7;P04117	Q3UW32;Q9EST5;Q9EST5-2	Q9Z2C9;G3V027;I6L9A6;G3UYB7;G3UYZ2	Q78IK4;Q9CZB4;B1AV14	Q91WN1;Q8BRQ6	Q9D8W7	Q99MR6-3;Q99MR6-4;Q99MR6-2;Q99MR6	Q58DZ3;P62889;Q497D7;Q5PR15	H3BKM2;Q3TI64;Q80YV2;D3Z3D0;Q80YV2-2	Q3UUF0;Q8C541;O08914;Q8BRM1	Q3TN07;P46467	Q8C0C7;E9PWY9;Q8BJG2;Q8BXN0;Q4FJQ2	Q3TXV7;Q3TW10;P29416;Q3THQ0;Q8BNS6;Q3UCP6;Q3U936;Q3TVI2;Q3TKF6	Q3U186	Q3U186	P31750;Q8BS26;D3Z783;D3YXX3	Q497K3;P62307;Q3UX80	Q5F258;Q68FF6	E9QJV4;A0PJ46;Q8K2Z2	P97868-2;P97868	D3YXZ5;Q91WT8;Q91WT8-2;D3Z113	Q8BP60;Q99JX7;V9GXF3;V9GXW3	Q3UUH0;Q91YI0;E0CXM2;E0CY49	P68404-2;P68404	P68404-2;P68404	Q3U9R7;Q3UB84;P47791-2;P47791;Q3UAS7;Q3TXK9;Q3TWI5;Q91Z57	P42128	P70158	Q542A1;Q61334	Q542A1;Q61334	Q3UDY1;P45376;Q5U415;Q3TCL2;D3YVJ7;Q3ULP0
	P06745;B7ZWL9	P06745;B7ZWL9	G3UYV7;Q059I1;P62858	Q9DC07	A1BN54;Q7TPR4	Q8K1E0;I1E4X1;Q8K1E0-2;H3BJE3;H3BKJ7;H3BJ02;H3BKP0	E9Q1G8;Q8C2A3;E9Q9F5;O55131;Q3UNN1;Q5DTS3	Q8C2Q8;Q9D9D7;Q3UD06;Q91VR2;A2AKU9;Q9ERA8;A2AKV2;A2AKV3;A2AKV1	Q8K4P0	Q91V01	P32020;P32020-2	I7HLV2;Q3THJ6;Q6ZWV3;P86048	Q99M51;Q8BH99;Q8BMV0;Q8BZ27;A0A087WSB1	Q3TLE4;Q8BQ46;F6QCI0	Q8C4G3;Q8C288;Q505G9;A2AQC3;Q6DI68;O70228	Q3U2G9;Q9QZ08;Q9D997;D3YXG2	Q3U2G9;Q9QZ08;Q9D997;D3YXG2	Q9D1R9	Q8K3X6	O09131	Q8K1L5	H3BKM2;Q3TI64;Q80YV2;D3Z3D0;Q80YV2-2	Q8BK37;Q5SWZ0;Q8R574;Q05BD4	Q8CAJ7;Q3U3I6;Q3TVK3;Q9Z2W0;Q8BPW9	P10649;A2AE89	Q11011;E9Q039;F6QYF8;E9Q6F4	Q11011;E9Q039;F6QYF8;E9Q6F4	Q3UIG8;Q9JIF0-2;Q8C2D7;Q3TPF5;Q80WB1;Q80WV6;Q9JIF0-3;Q9JIF0;D3Z0A2;F8WH01;D3Z3N0;Q9CX58	P62077	P68040	Q9CY58;Q3UJK2;Q9CY58-2;Q3UMP4;Q3UEI6;Q9CY58-3;Q3V274;Q9CY58-4	P62077	Q8R332-2;Q6ZQC2;Q3UZQ6;Q8R332-4;Q8R332-3;Q8R332	Q544T5;P00375	Q3UGS9;Q3URM1;Q3U3U6;Q8CCN6;Q60649;Q3TXD4;E9PY58	Q6NSU3	Q3TXR9;P20060	Q8BGH2	Q9DC23	Q3TPU5;O70378;Q8C988;Q3TTC9;M0QWY0;M0QWP2	Q9D1M0	Q9D1M0	Q9EQQ2
	P24638;Q3UZN1;Q3U4F3	Q9CYW4	O88712-2;O88712;O88712-3	P70122;F6TN03	B1AZ42;B1AZ39;P0C0A3;B1AZ41;Q3TS10	Q5SYD0;Q8K063;Q3UG58;B2RWZ2;Q5SYD0-2	Q3UIA1;P19426-2;P19426;G3UY39	E9Q1G8;Q8C2A3;E9Q9F5;O55131;Q3UNN1;Q5DTS3	Q544R7;Q3U6W4;O70252;D3YX62	Q8BIJ6;E9PWN2;Q8BIL6;E9PWN3	Q63918	P54775;Q569X4;Q3TFA5;Q8BKU2;Q3TJ97;Q3UBF0;Q52L53	Q6DIC9;B2RXY1;Q62288;Q8BM19;A0A087WPP6	B9EKE9;Q3TQX5;Q62167;B7ZWF1;B9EIA2;P16381	P17156;B7U582	Q3UA17;Q791V5;A2AFW6;Q9D050;Q05C68;D6RCZ1	Q9EPK2-4	Q9D823	Q544T5;P00375	Q540D7;Q9JII6;Q80XJ7;Q3UJW9;B1AXW3	Q3UUF0;Q8C541;O08914;Q8BRM1	Q8K1L5	Q3TGF2	Q5FWB6;E9Q070;D3YVM5	Q4FJP2;Q3UJ82;O35309	B0LAE4;Q3UBA1;Q3TQE3;Q8C1Y9;Q80ZW9;Q3TIC7;Q3THR3;Q9JKW0	D3YX15;Q61153;D6RDQ6	Q3UM45	P42128	Q921W2;Q545C1;P70318;D6RGU1	Q9EQU5-2;A2BE93;Q3T9S3;Q9EQU5;A2BE92;Q5U445	Q1WIL9;E9PYN1;Q8R5M8-4;Q8R5M8-3;Q8R5M8-2;Q8R5M8;Q8R5M8-7;Q8R5M8-6;E0CY16;Q8R5M8-5;Q9QYL3;Q9QYL4	Q5EBQ6;P51410;Q5M9J5;D3Z629	Q3UK83;Q3U7F3;Q3TIK8;Q5EBP8;P49312;Q3TFB1;P49312-2	Q5XW48;Q3U9A3;Q3TED6;Q9D679;Q91WI5;Q3TCU5;A0A068BIS1;Q9R233-2;Q9R233;Q5XW51;Q5XW49;Q5XW52;G3UZZ2;Q5XW46	D3YX15;Q61153;D6RDQ6	D3YX15;Q61153;D6RDQ6	Q91VD9;Q3TIU7;Q3UIQ2	G3XA13;Q99NH2;B2RUK1;B7ZNY3;F6S7Z1;A5D6P2;Q99NH2-2;E0CXR8;E0CZE2;E0CZ83;E0CXL4;Q99NH2-4;Q8BPQ6;Q8BPQ4;E9PYJ2;F6TSJ9;Q99NH2-3;E0CX45;E0CY24;Q99NH2-5;F6UGU7	Q9R0H0-2;Q9R0H0;A2A848;Q8C168;Q8BW35	Q61171;Q5M9N9;D3Z4A4	Q9R0H0-2;Q9R0H0;A2A848;Q8C168;Q8BW35	Q922B3;Q3UDC5
	Q4FK39;Q3UW00;Q9JL16-2;Q9JL16	Q4FK39;Q3UW00;Q9JL16-2;Q9JL16	F8WIG4;Q3TI08;Q3TY03;Q62384;F8WHU9;Q9JJA1;Q3TIH8;Q9CUE2;Q8C8U3	Q3THQ5;Q60864	A2AQL0;Q9Z1W9;G1JLS7;Q3V256	Q9DB15	Q9CSN5;Q9D3J1;Q9CXG3;Q9CSB0	Q8R404	A2AFQ0;Q7TMY8;Q4JG03;Q7TMY8-4;Q7TMY8-2	Q545I6;Q9WUU7;Q9ES94	I7HLV2;Q3THJ6;Q6ZWV3;P86048	Q3UYP2;Q3TVT6;Q9CQF9;Q99JK4	Q99K51;Q3UKB1;Q3UJG9;B1AX58	Q61699;Q61699-2;E9Q0U7	A2AJ23;Q925Q2;Q64322;A2AJ20;Q8CFL4;A2AJ21	A6H8H2-2;A6H8H2;E9Q449;Q3U2Y9	Q5U458;E9Q8B3	Q3TLU0	Q543K2;Q9WU84	Q3U6P5;Q9Z204;Q9Z204-5	D3YZ62;D3Z4J3;Q99104	D3YZ62;D3Z4J3;Q99104	Q3UI46;P29595;Q3TY05	Q9CQ92;G3X9U9	Q62426	P68404-2;P68404	P68404-2;P68404	Q99KQ9;Q9ES93;Q9R013;A4FUP7	O54988	Q8K1Z0;F6SFF5	Q3TGF2	Q9CY58;Q3UJK2;Q9CY58-2;Q3UMP4;Q3UEI6;Q9CY58-3;Q3V274;Q9CY58-4	Q99LB4;Q3UJ44;D3YTL5;Q3TNN6;P24452;D3YZN3;D3YU77	Q00PI9	Q3TJQ2;Q3U866;Q3U399;Q91ZN5-2;Q91ZN5	Q9CQ54;Q9D846	Q9CQ54;Q9D846	Q8VDB7;Q8VDB3;P63015-2;A2A409;Q8VDB6;Q8VDB4;Q8VBY9	P62077	A2ADR8;Q8R3G1	Q9EQU5-2;A2BE93;Q3T9S3;Q9EQU5;A2BE92;Q5U445	A2ADR8;Q8R3G1	Q4VBC9;O09111
[truncated: 644 more rows]

## Sheet: Enrichr_correlated
Enrichr Link	https://maayanlab.cloud/Enrichr/enrich?dataset=affcd1912271cd603ec6e26304ac789e	https://maayanlab.cloud/Enrichr/enrich?dataset=1c780e2bc6d537893887b41108b8e975	https://maayanlab.cloud/Enrichr/enrich?dataset=02d76770ec71dec961b14f8e0e3e43f7	https://maayanlab.cloud/Enrichr/enrich?dataset=5814dd85a2121c7c7b8fa1e9ceeee9fd	https://maayanlab.cloud/Enrichr/enrich?dataset=7c3f1843fc582d080a0d0865d1a1b898	https://maayanlab.cloud/Enrichr/enrich?dataset=ee5b12df64a5062905de5b115c5bbc9e	https://maayanlab.cloud/Enrichr/enrich?dataset=a078d455f506ee110921ba793ee36412	https://maayanlab.cloud/Enrichr/enrich?dataset=04973cd4f58fdc562cb60e4c28796c3f	https://maayanlab.cloud/Enrichr/enrich?dataset=b93baf1c6481acfc74bc4d3db26055b0	https://maayanlab.cloud/Enrichr/enrich?dataset=50b97a699ce269d9b94ebb4d21f4df24	https://maayanlab.cloud/Enrichr/enrich?dataset=bb265828775a8ce3b1ee7eb3a7a0cd37	https://maayanlab.cloud/Enrichr/enrich?dataset=40beab3b40302dae97f45d81e2486cf4	https://maayanlab.cloud/Enrichr/enrich?dataset=36bd8041e35c6a36675979b6b2df019b	https://maayanlab.cloud/Enrichr/enrich?dataset=8bc170e157ffe17f2885b29e1d95fe1b	https://maayanlab.cloud/Enrichr/enrich?dataset=adaf18fdc78e268cadda951f584137c0	https://maayanlab.cloud/Enrichr/enrich?dataset=83371fbf122799f59dca991e9df18d38	https://maayanlab.cloud/Enrichr/enrich?dataset=b8329446deed543ef04ca2d0cef298ca	https://maayanlab.cloud/Enrichr/enrich?dataset=157f4ed93a2ae57d74141c03db8e33f6	https://maayanlab.cloud/Enrichr/enrich?dataset=01c1a2257102a0822f2fb4187f81e70d	https://maayanlab.cloud/Enrichr/enrich?dataset=1354abd992348f36125749b1cc452c51	https://maayanlab.cloud/Enrichr/enrich?dataset=f38db4db2a25a80727295e93b66fbb14	https://maayanlab.cloud/Enrichr/enrich?dataset=cb7f0f65a0686da437129ca899589f2f	https://maayanlab.cloud/Enrichr/enrich?dataset=a7f63dd2fe9cdba5faea4603c60f5342	https://maayanlab.cloud/Enrichr/enrich?dataset=9e437dfc6459eeb0c9e78da2dbde686a	https://maayanlab.cloud/Enrichr/enrich?dataset=5e930262aaa3426d3ed3526877c6e5ce	https://maayanlab.cloud/Enrichr/enrich?dataset=ddf6f20f1e0b7d7a1536d353d599254b	https://maayanlab.cloud/Enrichr/enrich?dataset=6bdcfac8e8b8f8ce45b8d8f2cef1eca7	https://maayanlab.cloud/Enrichr/enrich?dataset=6f450776eb01c77c90e1adfde314bbcb	https://maayanlab.cloud/Enrichr/enrich?dataset=358c78f1ec40c8d44ceed59e53895394	https://maayanlab.cloud/Enrichr/enrich?dataset=d46471cccbd0899308bb064e5e2efa6d	https://maayanlab.cloud/Enrichr/enrich?dataset=af19dd95a7a4670943cce6540b89cf44	https://maayanlab.cloud/Enrichr/enrich?dataset=9c408b22526fb9d41cc0d7e4d90d9eee	https://maayanlab.cloud/Enrichr/enrich?dataset=2e91c8fef9f6dfab47c42ad73cb1e616	https://maayanlab.cloud/Enrichr/enrich?dataset=d7da6e86f68332ce4205be7c782ed16b	https://maayanlab.cloud/Enrichr/enrich?dataset=f096b1e58bed0dcdfaa0b9942666eb09	https://maayanlab.cloud/Enrichr/enrich?dataset=489c1bd4ca044529169659426d010f63	https://maayanlab.cloud/Enrichr/enrich?dataset=1074f084a27ee466dd537eafbc0e3420	https://maayanlab.cloud/Enrichr/enrich?dataset=376a2730d49ef09e95eeab1b2c43d691	https://maayanlab.cloud/Enrichr/enrich?dataset=8222ebf593cd381e38e462d673fd00a6	https://maayanlab.cloud/Enrichr/enrich?dataset=d5ab7341e7b0220da7ec723adee61348	https://maayanlab.cloud/Enrichr/enrich?dataset=535e00914faf0358086d135a1ed6e08b	https://maayanlab.cloud/Enrichr/enrich?dataset=b029abb37d3eff6679c4593fa14282a5	https://maayanlab.cloud/Enrichr/enrich?dataset=8575d6bbf87804bdee2389e291f5b172
[truncated: 879 more rows]

[truncated: 2 more sheets: Enrichr_anticorrelated, Key]
